# Supplementary material for: Service delivery models that promote linkages to PrEP for adolescent girls and young women and men in sub-Saharan Africa: a scoping review
Source: PubMed Central journal article supplement — BMJ Open. 2023 Mar 27;13(3):e061503. doi: 10.1136/bmjopen-2022-061503 (PMC10069497; doi:10.1136/bmjopen-2022-061503), 2023-03-27
Supplement: bmjopen-2022-061503.draft_revisions.pdf [file bmjopen-2022-061503.draft_revisions.pdf]

# BMJ Open

BMJ Open is committed to open peer review. As part of this commitment we make the peer review history of every article we publish publicly available.

When an article is published we post the peer reviewers' comments and the authors' responses online. We also post the versions of the paper that were used during peer review. These are the versions that the peer review comments apply to.

The versions of the paper that follow are the versions that were submitted during the peer review process. They are not the versions of record or the final published versions. They should not be cited or distributed as the published version of this manuscript.

BMJ Open is an open access journal and the full, final, typeset and author-corrected version of record of the manuscript is available on our site with no access controls, subscription charges or pay-per-view fees (<http://bmjopen.bmj.com>).

If you have any questions on BMJ Open's open peer review process please email [info.bmjopen@bmj.com](mailto:info.bmjopen@bmj.com)

# BMJ Open

## Service delivery models that promote linkages to PrEP for adolescent girls and young women and men in sub-Saharan Africa: A scoping review

|                               |                                                                                                                                                                                                                                                                                                                                                                                                                                                                                                                                                                                                                                                                                                                                                                                                                                                                                                                                                                                                                                                                                                                                                                                                                                                                                                                                                                                                                                                                                                                                                                  |
|-------------------------------|------------------------------------------------------------------------------------------------------------------------------------------------------------------------------------------------------------------------------------------------------------------------------------------------------------------------------------------------------------------------------------------------------------------------------------------------------------------------------------------------------------------------------------------------------------------------------------------------------------------------------------------------------------------------------------------------------------------------------------------------------------------------------------------------------------------------------------------------------------------------------------------------------------------------------------------------------------------------------------------------------------------------------------------------------------------------------------------------------------------------------------------------------------------------------------------------------------------------------------------------------------------------------------------------------------------------------------------------------------------------------------------------------------------------------------------------------------------------------------------------------------------------------------------------------------------|
| Journal:                      | <i>BMJ Open</i>                                                                                                                                                                                                                                                                                                                                                                                                                                                                                                                                                                                                                                                                                                                                                                                                                                                                                                                                                                                                                                                                                                                                                                                                                                                                                                                                                                                                                                                                                                                                                  |
| Manuscript ID                 | bmjopen-2022-061503                                                                                                                                                                                                                                                                                                                                                                                                                                                                                                                                                                                                                                                                                                                                                                                                                                                                                                                                                                                                                                                                                                                                                                                                                                                                                                                                                                                                                                                                                                                                              |
| Article Type:                 | Original research                                                                                                                                                                                                                                                                                                                                                                                                                                                                                                                                                                                                                                                                                                                                                                                                                                                                                                                                                                                                                                                                                                                                                                                                                                                                                                                                                                                                                                                                                                                                                |
| Date Submitted by the Author: | 02-Feb-2022                                                                                                                                                                                                                                                                                                                                                                                                                                                                                                                                                                                                                                                                                                                                                                                                                                                                                                                                                                                                                                                                                                                                                                                                                                                                                                                                                                                                                                                                                                                                                      |
| Complete List of Authors:     | Chirinda, Witness; South African Medical Research Council, Health Systems Research Unit<br>Ramraj, Trisha; South African Medical Research Council Durban, HIV Prevention Research Unit<br>Jonas, Kim; South African Medical Research Council, Health Systems Research<br>Govindasamy, D.; South African Medical Research Council, Health Systems Research Unit; University of Cape Town, Adolescent Health Research Unit<br>Jama, N.; South African Medical Research Council, Burden of Disease Research Unit<br>McClinton Appollis, Tracy; South African Medical Research Council, Health Systems Research Unit; University of Cape Town, Adolescent Health Research Unit<br>Zani, Babalwa; South African Medical Research Council, Burden of Disease Research Unit<br>Mukumbang, Ferdinand; South African Medical Research Council, Burden of Disease Research Unit<br>Basera, W.; South African Medical Research Council, Burden of Disease Research Unit<br>Hlongwa, Mbuzeleni ; South African Medical Research Council, Burden of Disease Research Unit<br>Turawa, Eunice; South African Medical Research Council, Burden of Disease Research Unit; Stellenbosch University Faculty of Medicine and Health Sciences, Community health<br>Mathews, C.; South African Medical Research Council, Health Systems Research Unit; University of Cape Town, Adolescent Health Research Unit<br>Nicol, Edward; South African Medical Research Council, Burden of Disease Research Unit, Tygerberg; Stellenbosch University, Faculty of Medicine and Health Sciences |
| Keywords:                     | PUBLIC HEALTH, HIV & AIDS < INFECTIOUS DISEASES, Public health < INFECTIOUS DISEASES                                                                                                                                                                                                                                                                                                                                                                                                                                                                                                                                                                                                                                                                                                                                                                                                                                                                                                                                                                                                                                                                                                                                                                                                                                                                                                                                                                                                                                                                             |
|                               |                                                                                                                                                                                                                                                                                                                                                                                                                                                                                                                                                                                                                                                                                                                                                                                                                                                                                                                                                                                                                                                                                                                                                                                                                                                                                                                                                                                                                                                                                                                                                                  |

1  
2  
3  
4  
5  
6  
7  
8  
9  
10  
11  
12  
13  
14  
15  
16  
17  
18  
19  
20  
21  
22  
23  
24  
25  
26  
27  
28  
29  
30  
31  
32  
33  
34  
35  
36  
37  
38  
39  
40  
41  
42  
43  
44  
45  
46  
47  
48  
49  
50  
51  
52  
53  
54  
55  
56  
57  
58  
59  
60

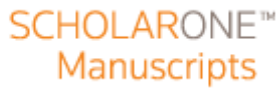

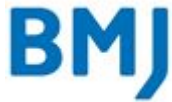

I, the Submitting Author has the right to grant and does grant on behalf of all authors of the Work (as defined in the below author licence), an exclusive licence and/or a non-exclusive licence for contributions from authors who are: i) UK Crown employees; ii) where BMJ has agreed a CC-BY licence shall apply, and/or iii) in accordance with the terms applicable for US Federal Government officers or employees acting as part of their official duties; on a worldwide, perpetual, irrevocable, royalty-free basis to BMJ Publishing Group Ltd ("BMJ") its licensees and where the relevant Journal is co-owned by BMJ to the co-owners of the Journal, to publish the Work in this journal and any other BMJ products and to exploit all rights, as set out in our [licence](#).

The Submitting Author accepts and understands that any supply made under these terms is made by BMJ to the Submitting Author unless you are acting as an employee on behalf of your employer or a postgraduate student of an affiliated institution which is paying any applicable article publishing charge ("APC") for Open Access articles. Where the Submitting Author wishes to make the Work available on an Open Access basis (and intends to pay the relevant APC), the terms of reuse of such Open Access shall be governed by a Creative Commons licence – details of these licences and which [Creative Commons](#) licence will apply to this Work are set out in our licence referred to above.

Other than as permitted in any relevant BMJ Author's Self Archiving Policies, I confirm this Work has not been accepted for publication elsewhere, is not being considered for publication elsewhere and does not duplicate material already published. I confirm all authors consent to publication of this Work and authorise the granting of this licence.

**Title**

Service delivery models that promote linkages to PrEP for adolescent girls and young women and men in sub-Saharan Africa: A scoping review

**Authors**

Witness Chirinda<sup>1</sup>; \*Trisha Ramraj<sup>2</sup>; Kim Jonas<sup>1,3</sup>; Darshini Govindasamy<sup>1,3</sup>; Ngcwalisa Jama<sup>4</sup>; Tracy McClinton Appollis<sup>1,3</sup>; Babalwa Zani<sup>4</sup>; Ferdinand Mukumbang<sup>4</sup>; Wisdom Basera<sup>4</sup>; Mbuzeleni Hlongwa<sup>4,5</sup>; Eunice Turawa<sup>4</sup>; Catherine Mathews<sup>1,3</sup>; Edward Nicol<sup>4,6</sup>

**Author Affiliations**

<sup>1</sup>Health Systems Research Unit, South Africa Medical Research Council, Cape Town, South Africa

<sup>2</sup>HIV Prevention Research Unit, South Africa Medical Research Council, Cape Town, South Africa

<sup>3</sup>Adolescent Health Research Unit, Division of Child and Adolescent Psychiatry, Faculty of Health Sciences, University of Cape Town, Cape Town, South Africa

<sup>4</sup>Burden of Disease Research Unit, South African Medical Research Council, Cape Town, South Africa

<sup>5</sup>School of Nursing and Public Health, University of KwaZulu-Natal, Durban, South Africa.

<sup>6</sup>Health Systems and Public Health Division, Faculty of Medicine and Health Sciences, Stellenbosch University, Cape Town, South Africa

**\*Corresponding author:** Trisha Ramraj, HIV Prevention Research Unit, South African Medical Research Council, 491 Peter Mokaba Road, Durban, 4093, South Africa.

*E-mail address:* [trisha.ramraj@mrc.ac.za](mailto:trisha.ramraj@mrc.ac.za)

Word count: 5353

## Abstract

**Objectives:** To synthesize and appraise the effectiveness and feasibility of pre-exposure prophylaxis (PrEP) service delivery models (SDMs) designed to promote linkage to PrEP care among AGYW and men in sub-Saharan Africa. The objectives were to a) summarize SDMs that promote PrEP initiation and b) explore users' perceptions, and barriers to, and facilitators of these models.

**Search Strategy:** This scoping review follows the methodology outlined in the Joanna Briggs Institute reviewers' manual. PubMed, Cochrane library, Scopus, Web of Science, and online-conference abstract archives were searched. We included quantitative and qualitative studies that described process outcomes (i.e., linkage to PrEP care) and barriers, facilitators, and user perceptions of PrEP SDMs.

**Results:** Of the 1204 identified records, 37 (27 studies and 10 conference abstracts) met the inclusion criteria. Health facility-based (HF-B) integrated models of PrEP delivery with family planning, maternal and child health (MCH) or sexual and reproductive services to AGYW resulted in PrEP initiation of 16-90%. Community-based drop-in centres (66%) was the preferred PrEP outlet for AGYW compared to public clinics (25%) and private clinics (9%). Most men preferred community-based delivery models. Among individuals who initiated PrEP, 50% were men, 62% were <35 years old and 97% were tested at health fairs compared to home testing. Integrated ART-PrEP delivery was favoured among serodiscordant couples with 82.9% of couples using PrEP or ART with no HIV seroconversions. PrEP uptake within healthcare facilities was increased by perceived client-friendly services and non-judgmental healthcare workers. Barriers to PrEP uptake included distance to travel to and time spent at health facilities and perceived community stigma.

**Conclusion:** PrEP SDMs for AGYW and men need to be tailored to the needs and preferences for each group. PrEP programme implementers should promote community-based SDMs to increase PrEP initiation among AGYW and men.

**Key words:** Pre-exposure prophylaxis, PrEP, linkage, adolescent girls, and young women, AGYW, men, sub-Saharan Africa

### Strengths and limitations of this study

- A comprehensive search strategy was developed, and the search was carried out across multiple databases and conference archives.
- The methodology used in the scoping review was robust and included double data screening, extraction and synthesis.
- All included studies underwent critical appraisal of sources of evidence using approved tools.
- Studies not conducted in SSA and that were published in non-English languages were excluded.
- Most of the included studies were from Kenya, Uganda, and South Africa limiting the generalizability of the results.

### Background

Recent reports indicate a decline in new HIV infections globally. However, this decline is occurring at a slower pace in regions with generalized HIV epidemics such as sub-Saharan Africa (SSA). In 2017, SSA accounted for 64% of new HIV infections globally.<sup>1</sup> Two underserved populations that are critical to drive the decline in new HIV infections are adolescent girls and young women (AGYW; 15-24 years) and men (25-65 years). AGYW are at substantial risk for HIV-infection with an estimated 310 000 new infections globally in 2018 – 86% of which was in SSA.<sup>1</sup> Men, on the other hand, account for more AIDS-related deaths globally than women – 400 000 deaths in men in 2018 compared to 270 000 in woman.<sup>1</sup>

For differing reasons, AGYW and men show lower health seeking behaviour because of interpersonal and structural factors. AGYW's access to health services is limited by stigma, negative attitudes from healthcare workers and inconvenient clinic operating hours.<sup>2</sup> However, 'man unfriendly clinics' are characterised by inaccessible clinic hours/locations, difficulty in engaging with female staff, and gender norms that discourage men from accessing health services.<sup>3,4</sup>

Amongst the 2020 Global Prevention Targets and Commitments is the reduction in the number of AGYW newly infected with HIV globally to below 100 000, and to ensure that 3 million people at substantial risk of contracting HIV have access to pre-exposure prophylaxis (PrEP).<sup>5</sup> To achieve these targets, primary prevention programmes should be structured around five central pillars: (1) combination prevention for AGYW; (2) combination prevention with key populations; (3) voluntary medical male circumcision (VMMC) and sexual and

1  
2  
3 reproductive health services (SRHS) for men and boys; (4) comprehensive condom  
4 programmes; and (5) rapid introduction of PrEP.<sup>5</sup> PrEP for HIV refers to the use of  
5 antiretroviral drugs among HIV-negative people to prevent the acquisition of HIV.<sup>6</sup>  
6  
7

8  
9 PrEP has shown effectiveness in reducing HIV acquisition among couples, sex workers, men  
10 who have sex with men (MSM), transgender and people who inject drugs and AGYW.<sup>7</sup> The  
11 impact of PrEP on the HIV epidemic depends on the extent of PrEP uptake among people at  
12 substantial risk for HIV infection (World Health Organization (WHO) defined substantial risk  
13 of HIV acquisition as HIV incidence of 3 per 100 person-years or higher in the absence of  
14 PrEP).<sup>7,8</sup> Since September 2015, the WHO recommended offering oral PrEP to every person  
15 at substantial risk of contracting HIV.<sup>7</sup> In the current South African guidelines for PrEP, specific  
16 populations considered to be at substantial risk of HIV infection include AGYW, MSM, people  
17 with more than one sexual partner, people who inject drugs, people with a recent history of  
18 sexually transmitted infections, people who recognise their own risk and request PrEP,  
19 serodiscordant couples if the HIV positive partner is not virally suppressed, and sex  
20 workers.<sup>9,10</sup>  
21  
22  
23  
24  
25  
26

27 Literature on PrEP has largely been focused on knowledge, attitudes, and interest in PrEP. As  
28 countries scale up use of PrEP as part of their combination prevention packages, evidence on  
29 SDMs that promote uptake and continuation on PrEP are needed especially among vulnerable  
30 and hard to reach populations such as AGYW and men. HIV prevention cascades have been  
31 proposed as a logical framework to monitor populations at substantial risk for HIV acquisition  
32 as they navigate the steps from HIV testing to assessing the risk of the individual to  
33 determining PrEP eligibility before PrEP initiation and continuation or discontinuation.  
34  
35  
36  
37

38 PrEP uptake represents a critical step in the PrEP cascade (Figure 1),<sup>8,10</sup> because it reflects  
39 people's awareness and interest in lowering their risk for HIV. Differentiated models, which  
40 are centred around clients' needs and expectations and relieving unnecessary burdens on the  
41 health system while targeting behavioural and structural determinants of AGYW and men,  
42 can potentially increase acceptability and accessibility of PrEP. These include innovative  
43 strategies that streamline HIV testing, link AGYW and men to HIV prevention services, provide  
44 differentiating medication access points, reduce stigma and barriers of parental consent for  
45 PrEP uptake.<sup>11</sup> PrEP SDMs should be designed with the populations being served central to  
46 the design.<sup>12</sup>  
47  
48  
49  
50  
51  
52  
53  
54  
55  
56  
57  
58  
59  
60



[Insert Figure 1 here]

**Figure 1: Oral PrEP cascade: Adapted from Dunbar et al (2018)<sup>8</sup>**

Following an HIV-negative diagnosis (step 1), an individual is assessed for risk of HIV (step 2). An individual at substantial risk of HIV acquisition or who requests pre-exposure prophylaxis (PrEP) is assessed for eligibility for PrEP (step 3). After documenting eligibility for PrEP use, several baseline clinical investigations are conducted (step 4 PrEP is initiated (step 5) on the same-day as HIV testing. The recommended regimen is TDF (Tenofovir) /FTC (emtricitabine) 1 tablet by mouth daily. PrEP continuation visits (step 6) include: month 1, every 3 months. PrEP is discontinued (step 7) if the individual tests HIV positive, develops renal disease, is non-adherent, does not want or need PrEP, no longer meets eligibility criteria, or if there are safety concerns.

PrEP is an emerging prevention implementation science (IS) research area. However, at present, there is a gap in knowledge on the characteristics of AGYW and men who initiate PrEP compared to those who do not initiate PrEP. This information is critical for informing national policies and implementation guidelines for PrEP roll-out. As such, the aim of this review was to synthesize and appraise the effectiveness and feasibility of PrEP SDMs designed to promote linkage to care among AGYW and men eligible for PrEP in SSA. The objectives were to a) summarize SDMs that promote PrEP initiation and b) explore users' perceptions, and barriers and facilitators of these models.

## Methods

We used a scoping review design to map existing literature, explore the research studies conducted and identify research and knowledge gaps in models used to deliver PrEP.<sup>13</sup> Scoping reviews can be of particular use when the topic has not yet been extensively reviewed or is of a complex or heterogeneous nature.<sup>14</sup> The research question was defined using the PICO (Population- Intervention-Comparison-Outcome) framework (Table 1). We defined our outcomes as i) Linkage to PrEP care (defined as the proportion of AGYW or men who are initiated on PrEP following an HIV-negative diagnosis, step 7 of Figure 1) and ii) perceptions, barriers, and facilitators of SDMs.

**Table 1:** Scoping review population, intervention, and outcome

|              |                                                                                                                                                      |
|--------------|------------------------------------------------------------------------------------------------------------------------------------------------------|
| Population   | Heterosexual females (15-24 years) and men (25-65 years)                                                                                             |
| Intervention | Interventions (SDMs) designed to improve PrEP uptake                                                                                                 |
| Comparison   | Not applicable                                                                                                                                       |
| Outcome      | Linkage to PrEP care (defined as the proportion of AGYW or men who are initiated on PrEP following a HIV-negative diagnosis) and perceptions on SDMs |

### Protocol and registration

This review was conducted and reported in line with the Joanna Briggs Institute (JBI) reviewer's manual and structured using the Preferred Reporting Items for Systematic Reviews and Meta-Analyses extension for scoping reviews (PRISMA-ScR).<sup>15,16</sup> A review protocol for this scoping review was registered with the Open Science Framework (DOI 10.17605/OSF.IO/EG9TD).

### Research ethics approval

The scoping review focuses on published research in the public domain therefore no ethics approval is required.

### Patient and public involvement

No patients or public were involved in the study.

### Eligibility criteria

We included primary studies on PrEP service delivery models for AGYW and men, with both qualitative and quantitative study designs published in English and conducted in SSA. No restrictions on the date of publication were applied. Table 2 details the inclusion criteria applied to studies. We excluded studies that were focused exclusively on key population groups in HIV programmes such as lesbian, gay, bisexual, MSM etc. and publication types (e.g., systematic reviews, case studies, etc).

**Table 2:** Eligibility criteria describing study inclusion criteria for the scoping review

|            |                                                                                                                                                                                                                                                                                  |
|------------|----------------------------------------------------------------------------------------------------------------------------------------------------------------------------------------------------------------------------------------------------------------------------------|
| Study type | Quantitative studies including randomized clinical trials (RCT), quasi-randomized, and non-RCTs, longitudinal observational (historical cohorts, prospective cohorts, case-control, and before-and-after studies), analytic cross-sectional studies, and non-comparative studies |
|            | Qualitative studies using any study design                                                                                                                                                                                                                                       |
| Population | Study population included heterosexual females (15-24 years) and males (25-65 years)                                                                                                                                                                                             |
| Outcomes   | Focus of research: PrEP SDMs i.e., service provision / IS / models of care / differentiated care / linkage to care / intervention                                                                                                                                                |
|            | Papers reporting on barriers and facilitators of PrEP SDMs                                                                                                                                                                                                                       |
|            | Papers on user perceptions of PrEP SDMs                                                                                                                                                                                                                                          |
| Setting    | Sub-Saharan African countries – based on the World Bank's country classification <sup>17</sup>                                                                                                                                                                                   |

### Information sources and search strategy

PubMed, Cochrane library, Scopus, and Web of Science including three online conference archives (AIDS conference, Conference on Retroviruses and Opportunistic Infections and International AIDS Society Conference on HIV Science) were searched. The three-step search strategy recommended by the JBI Reviewer's Manual was used.<sup>15</sup> During the first step, one author (WC) conducted an elementary search on PubMed to establish the volume of relevant articles on the topic. Two authors (WC and TR) then screened the title and abstract of the retrieved articles to identify keywords and index terms which were used to build a search strategy (see online supplementary appendix 1). The final search results were exported into EndNote,<sup>19</sup> and duplicates were removed.

### Selection of sources of evidence

Titles and abstracts were double screened in Rayyan<sup>18</sup> by any two of a group of eight independent authors (TR, WC, KJ, NJ, DG, TMA, MH, ET). There was no restriction placed on age range during the screening phase to ensure that articles with age disaggregated analysis were included. Full text articles and conference abstracts, including articles from the 2020 AIDS conference were retrieved and independently double screened by WC and TR.

### Data charting process and data items

Using a pre-designed data-charting form, key and relevant information were systematically extracted from full-text articles in REDCap<sup>20</sup> by any two of a group of ten independent authors (TR, WC, TMA, NJ, DG, BZ, CM, MH, ET, EN). We charted data on article characteristics, population characteristics, intervention characteristics, and key outcomes (Table 1).

### Critical appraisal of individual sources of evidence

Information for quality assessment was incorporated into the data charting form on REDCap.<sup>20</sup> Due to the different study designs and research methodologies adopted in the included studies, we used three different tools to appraise the articles. For comparative studies including randomised trials, non-randomised trials, interrupted time-series and controlled before-after-studies, we used the risk of bias criteria recommended by the Effective Practice and Organisation of Care (EPOC).<sup>21</sup> For qualitative studies, we used the Critical Appraisal Skills Programme (CASP) checklist.<sup>22</sup> For other studies we used the Ways of Evaluating Important and Relevant Data (WEIRD) tool.<sup>23</sup> Modelling studies were excluded from the appraisal step.

### Analysis

For quantitative studies we used a narrative analysis and tabulated data by gender and by SDM. We summarized the settings, populations, and sample for each group, along with the interventions and findings. For qualitative studies, we analysed themes, authors'

1  
2  
3 interpretations, and quotes and integrated these findings to support the quantitative data.  
4 We tabulated the data by SDMs (health facility, community, research, or mobile) and by  
5 population (AGYW only, men only, or models for both). Furthermore, we determined the  
6 existing gaps in the different categories of interventions that can be strengthened to promote  
7 uptake and continuation on PrEP among AGYW and men.  
8  
9  
10

## 11 12 13 **Results**

### 14 **Selection of sources of evidence**

15 Our search identified 1604 citations. After duplicates (413) were removed, a total of 1204  
16 titles and abstracts were identified from searches of electronic databases and 13 from other  
17 sources including conferences. The PRISMA flow diagram (Figure 2) illustrates the screening  
18 process to identify records that meet the study inclusion criteria. Based on the screening of  
19 title and abstracts, 1102 records were excluded, with 102 full text articles and conference  
20 abstracts to be retrieved and assessed for eligibility. From the review of full text articles 67  
21 were excluded for the following reasons: editorials/commentaries/reviews/protocols,  
22 interviews with stakeholders, articles on topical PrEP, wrong outcome and focus on key  
23 populations. During data charting, two additional articles were excluded. Four additional  
24 articles were added after the initial search process, these articles were identified following  
25 the 2020 AIDS conference in July. The final number of studies that were considered eligible  
26 for this scoping review were 37 (27 studies and 10 conference abstracts).  
27  
28  
29  
30  
31  
32  
33  
34

35 **[Insert Figure 2 here]**  
36  
37  
38

### 39 **Figure 2:** PRISMA flow diagram

40 Adapted from: Moher et al<sup>24</sup>  
41

### 42 **Description of sources of evidence**

43 A description of the characteristics, setting, SDMs and intervention modalities of the included  
44 studies are provided in online supplementary appendix 2. There was a mixture of quantitative  
45 (n=23), qualitative (n=11) and mixed method studies (n=3). Most studies were  
46 demonstration/IS projects (n=10) while other methodological approaches included  
47 randomised controlled trials (RCTs) (n=5) and cross-sectional studies (n=5). Most were  
48 conducted in Kenya (n=17), with the remainder conducted in Uganda (n=10), South Africa  
49 (n=10), Tanzania (n=3), Malawi (n=2), Mozambique (n=2), and Zimbabwe (n=1). These studies  
50 reported evidence on the following PrEP SDMs; health facility (6), mobile (1), research site  
51 (8), community (6), hybrid (10), and not described/not applicable (6). Thirteen studies focused  
52 on AGYW, 19 studies focused on AGYW and men, one study focused on men only, and four  
53 were classified as other (i.e., age categories were not specified). PrEP services were offered  
54 in 25 of the 37 studies whilst PrEP perceptions/opinions were assessed in the other 12 studies.  
55  
56  
57  
58  
59  
60

### Critical appraisal of evidence

Full text articles appraised using the WEIRD tool were mostly assessed as having either no or very minor or moderate concerns for items that were unclear in the article (see online supplementary appendix 3). Most of the qualitative studies or abstracts performed well on all items except on items 4 (the recruitment strategy was appropriate to the aims), 8 (the rigour of the data analysis) and 10 (the value of the research in terms of its contribution to the literature and/or policy and process). Due to limited information in the abstracts to clearly answer the items using the WEIRD tool, most of the abstracts were appraised as either having an unclear or serious risk of bias.<sup>31-33,36,43,51</sup>

### Results of sources of evidence

#### PrEP SDMs for AGYW

Amongst AGYW, PrEP SDMs included HF-B (n=6), hybrid (mobile clinic-healthcare facility or community-healthcare facility, n=3), research site (n=2) and mobile clinic (n=1)(see online supplementary appendix 2).

#### Health facility

Three studies from Kenya evaluated a HF-B delivery modality by integrating PrEP delivery into routine services. Mugwanya et al.<sup>26</sup> evaluated integrated delivery of PrEP in family planning (FP) clinics whilst Kinuthia et al. and Pintye et al. evaluated approaches to integrate PrEP into MCH clinics providing antenatal care (ANC) and post-natal care (PNC).<sup>27,28</sup> Integration of universal screening and counselling for PrEP in FP and MCH clinics resulted in PrEP uptake of 16% and 49.2% respectively among AGYW. Younger women ( $\leq 24$  years) who initiated PrEP at MCH clinics were significantly more likely to return for a PrEP refill at month 3 compared to women  $>24$  years (54.9% versus 45.1%) ( $p=0.05$ ).<sup>28</sup> These studies utilised nurses dedicated to providing PrEP services only, which may limit applicability in a sub-Saharan setting where facilities have a limited clinical workforce. A study by Ngure et al. which integrated PrEP with FP services found that PrEP dispensation was more frequent among those concurrently using effective contraception, (adjusted relative risk [aRR]=1.19; 95% confidence interval [CI]=1.08-1.32) and contraceptive use was more common among those on PrEP (aRR=1.63; 95% CI=1.18-2.25).<sup>59</sup> Pintye et al. found that participants who initiated PrEP at MCH clinics took an additional 18 minutes for PrEP related activities over and above the time spent at the clinic to receive routine MCH services. The additional time could deter AGYW from initiating and continuing PrEP and depending on healthcare facility size and patient volume integrating PrEP into these routine services could result in several additional hours of work for nurses.<sup>27</sup>

#### Hybrid (community-health facility)

Two studies evaluated the scaling up of PrEP in Kenya through integration into routine health services in drop-in centres (DICEs), public and private health facilities.<sup>32,35</sup> Ongwen et al. reported that within the context of the Jilinde project, which implements oral PrEP as a routine service at a public health scale in Kenya, 6.5% AGYW initiated PrEP, and DICEs were

1  
2  
3 the preferred PrEP outlet for adolescent girls with 66% accessing services in DICEs, 25% in  
4 public clinics and 9% in private clinics. Amongst AGYW who initiated PrEP, the entry channel  
5 into the PrEP pathway was through peer educators and networks (50%); community  
6 outreaches (20%); and within health facilities (30%).<sup>32</sup> Were et al. found that among all  
7 individuals eligible for PrEP in the study which included female sex workers and MSM, 11% of  
8 AGYW initiated PrEP.<sup>35</sup> The majority (81%) of clients initiated PrEP through DICEs, whereas  
9 14% and 5% were initiated through public and private facilities respectively. The majority of  
10 AGYW did not persist on PrEP use at month-1 (68% drop off) and month-3 (94% drop off)  
11 follow-ups. Qualitative evidence from this study found that AGYW who initiated PrEP in public  
12 and private health facilities reported insensitive referral and access to the PrEP delivery  
13 pathways where *"The (HIV) testing place is different from the place I was asked questions and*  
14 *the place for collecting the medicine is also different. We took long because we were walking*  
15 *form one place to another".<sup>35</sup>*

### 22 23 Research site

24 Delany-Moretlwe conducted an RCT in Tanzania and South Africa to evaluate whether  
25 empowerment clubs increased PrEP uptake and continuation among AGYW. Participants  
26 were randomised to SoC, which included comprehensive SRHS, with counselling and short  
27 message service (SMS) reminders for PrEP users, or to empowerment clubs plus SoC. Across  
28 both arms, 97% initiated PrEP. PrEP continuation did not vary significantly by study arm and  
29 diminished with time (73% at Month-1, 61% at Month-3 and 34% at Month-6).<sup>34</sup> Donnell et  
30 al. found that HIV incidence declined significantly after on-site provision of PrEP at the  
31 research sites.<sup>60</sup> Hill et al. found that epidemiologic HIV risk scores were positively associated  
32 with PrEP interest, and that high numbers of AGYW both above and below the high-risk cut-  
33 off were very interested in PrEP (68% vs. 63%).<sup>30</sup>

### 39 40 Mobile

41 A South African study found that integrating PrEP with SRHS and delivering it via an  
42 adolescent-friendly mobile clinic led to an increase in both PrEP initiation and contraception.  
43 AGYW who were using contraception were significantly more likely to initiate PrEP (76%) on  
44 the same-day compared to those who were not using contraception and declined PrEP (66%)  
45 (p=0.001). Contraception was initiated by 44% of AGYW on the same-day as PrEP initiation  
46 compared to 30% who declined PrEP (p=0.003).<sup>33</sup> No qualitative evidence on the acceptability  
47 and feasibility of mobile delivery models were identified.

### 52 53 **Overall perceptions of SDMs by AGYW**

54 In a study conducted in Malawi, Maseko et al found high levels of hypothetical PrEP  
55 acceptability among AGYW who reported that interest in PrEP depends on confidential access  
56 and discrete packaging (cartons or bottles that resemble treatment for common ailments) of  
57 the drug. Moreover, AGYW reported that youth-friendly delivery modalities such as schools  
58 and youth-friendly sections of health centres that provide *"...a place for the youths to be*  
59  
60

1  
2  
3 *comfortable getting these drugs...*” may facilitate the initiation of PrEP as a prevention  
4 strategy.<sup>25</sup>  
5  
6

### 7 **PrEP SDMs for men**

8 We found one mixed method study among young South African men. PrEP was not provided,  
9 but hypothetical perceptions, barriers and enablers of PrEP uptake were assessed. Whilst only  
10 11% of men were aware of PrEP, 62% reported that they were very likely to take it. The young  
11 men preferred to keep PrEP use a secret from their partners, friends, and family. Uptake of  
12 PrEP was also dependent on the SDM used. Receiving PrEP from the clinic was reported as a  
13 barrier to PrEP usage as this could incite community stigma. Young men reported that “...they  
14 (community) would immediately think that you are HIV positive already, not that you are  
15 taking the prevention one...”  
16  
17  
18  
19

### 20 **PrEP SDMs for AGYW and men**

21 We found 19 studies that assessed various SDMs for linkages to PrEP for AGYW and men.  
22 Amongst AGYW and men, PrEP SDMs included hybrid (research site-healthcare facility or  
23 community-healthcare facility, n=8), community (n=5) and research site (n=6). These studies  
24 either recruited serodiscordant couples or included AGYW and men as individual participants.  
25  
26  
27  
28  
29

### 30 Hybrid

31 We identified seven studies that used a hybrid model to deliver PrEP.<sup>38-42,44,49</sup>  
32

33 One study from Kenya and Uganda by Heffron et al. involved a hybrid (research site- health  
34 facility) model that integrated PrEP delivery into antiretroviral therapy (ART) treatment  
35 services for high-risk HIV serodiscordant couples.<sup>49</sup> The intervention was mainly couples-  
36 based and involved HIV prevention counselling; safer conception counselling or  
37 contraceptives; counselling and HIV testing for HIV-negative partner; PrEP  
38 initiation/prescription; and referral to a local health facility for the HIV infected partner for  
39 ART. The results showed high uptake of integrated PrEP and ART with an estimated 96%  
40 reduction in HIV incidence (82.9% of couples used PrEP or ART and there were no HIV  
41 seroconversions, 14.5% used some ART and/or PrEP and 2.6% used neither PrEP nor ART).<sup>49</sup>  
42  
43  
44  
45  
46  
47  
48

49 Qualitative evidence that explored HIV serodiscordant couple’s decision-making and  
50 motivations to initiate PrEP through this integrated ART-PrEP approach showed that a positive  
51 clinical encounter with a healthcare provider and client-friendly services played a critical role  
52 in the couple’s decisions to initiate and continue PrEP.<sup>38</sup> Clear messaging, in-depth  
53 counselling and friendly, non-judgmental/stigmatizing services provided by healthcare  
54 workers empowered, reassured and promoted PrEP uptake among HIV serodiscordant  
55 couples with some describing it as “*service beyond the medicine*’.<sup>38</sup> Furthermore, being at a  
56 place where service is offered to both couple (ART for the HIV positive partner and PrEP for  
57 the HIV-negative partner) motivated their decision.<sup>38</sup>  
58  
59  
60

1  
2  
3  
4  
5 Five studies used a hybrid mobile testing approach implemented at community health fairs,  
6 home, or local health facility.<sup>39-43</sup> Two studies from Kenya and Uganda showed that PrEP  
7 initiation was high (>75%) among individuals who received HIV testing on the same-day.<sup>39,40</sup>  
8 Mayer et al. found that 39% of participants initiated PrEP within 4 weeks of the community  
9 health campaign.<sup>41</sup> However, the distance between the participants and the healthcare  
10 provider influenced PrEP initiation.  
11  
12

13  
14 Koss et al. and Camlin et al. who explored barriers influencing uptake and continuation of  
15 PrEP using the hybrid (community-health facility) model,<sup>42,43</sup> found that PrEP initiation was  
16 hindered by HIV/ART-related stigma which emanated from the colour of the pill being the  
17 same as HIV treatment regimens, and access of PrEP services at the same facility where HIV  
18 care is provided.<sup>42</sup> Men reported that the “... majority of us fear to go to the health center...”  
19 and suggested alternatives such as designating a clinic day for PrEP or “...distribute [PrEP] to  
20 the people...”. Participants reported that healthcare workers should deliver PrEP or find  
21 delivery methods that are easily accessible by the community “...just like they did with  
22 condoms.” Young adults who attended school outside the community could not initiate PrEP  
23 given that PrEP was only provided within study communities. Furthermore, school attendance  
24 made initiating and continuing PrEP challenging.<sup>42,43</sup>  
25  
26  
27  
28  
29  
30

### 31 Community

32 Two South African studies conducted in a community setting explored the hypothetical  
33 opinions of PrEP among salon owners, stylists, and clients.<sup>45,46</sup> Ninety-five percent of owners  
34 and stylists and 77% of clients were comfortable with PrEP being offered at hair salons,<sup>45</sup>  
35 which provide a geographically convenient and conducive environment for receiving health  
36 services.<sup>45,46</sup> A third community-based study which used a 90-second PrEP demand creation  
37 video and informational brochures, found that 68% and 56% of young women respectively  
38 reported that they were definitely interested in learning more about and initiating PrEP. The  
39 study also found that young women preferred realistic visuals that they could identify with,  
40 rather than highly stylized models. Data evaluated by Lubwama et al. showed that 69.2% of  
41 key populations which included AGYW and serodiscordant couples were reached through  
42 drop-in centres and community-based outreach centres providing PrEP versus fixed public  
43 health facilities.<sup>47</sup> The proportion that returned for PrEP was higher among serodiscordant  
44 couples (3 months: 56.9%, 6 months: 46.8%) compared to sex workers (3 months: 37.5%, 6  
45 months: 26.3%).  
46  
47  
48  
49  
50  
51

### 52 Clinical Research Site

53 In three of the six studies conducted at a clinical research site,<sup>37,48-53</sup> PrEP was integrated with  
54 ART or with ART and other interventions such as VMMC.<sup>37,49,53</sup> Across the three studies, ≥95%  
55 of the HIV-negative partner within serodiscordant couples initiated PrEP. The use of PrEP in  
56 combination with ART or other prevention interventions (VMMC) or conception strategies  
57  
58  
59  
60



1  
2  
3 resulted in reduced HIV incidence. Serodiscordant couples found that the “couples-focused”  
4 services provided through the integrated PrEP-ART strategy strengthened their relationships.  
5  
6

### 7 **Overall perceptions of SDMs by AGYW and men**

8 Several studies explored factors that influence PrEP uptake, non-initiation and  
9 discontinuation in individuals who received PrEP through the different SDMs.<sup>38,42-44,50,51</sup>  
10 Motivators to initiate PrEP included: perception of high-risk, preference of PrEP over other  
11 HIV prevention methods, protection from unwanted/forced sexual encounters, love for one's  
12 partner, knowledge about PrEP and the belief it is effective, partner support belief that PrEP  
13 supported life goals and a positive clinical encounter.<sup>38,42-44,50,51,61</sup> Females preferred a  
14 product that was delivered at a health clinic over accessing it at a pharmacy.<sup>54</sup> Barriers to PrEP  
15 initiation included daily pill burden, side effects, mixed dosing messaging, living with parents  
16 or attending school, partners consent or partners reaction to use and HIV-related stigma.<sup>38,42-  
17 44,50,51,61</sup>  
18  
19  
20  
21  
22  
23

### 24 **Other models**

25 We identified four other studies that explored other methods of promoting PrEP uptake  
26 among AGYW and men.<sup>55-58</sup> Jani et al. explored male partners support for hypothetical PrEP  
27 use by AGYW.<sup>55</sup> Male partners highlighted that their support would be contingent on their  
28 early involvement in the decision-making process regarding PrEP which would alleviate  
29 suspicion of infidelity. AGYW suggested that not including male partners may result in social  
30 harms (partner violence, dissolution of relationships). Strategies recommended by male  
31 partners included couples counselling, educating, and providing PrEP to men and community  
32 sensitization. Makyao et al. explored parental support of AGYW's hypothetical use of PrEP.  
33 Parents supported PrEP availability acknowledging the risks faced by AGYW.<sup>56</sup> However,  
34 support was also influenced by social norms (promoting promiscuity or condoning sexual  
35 activity). Differential parenting roles influenced the type of support: mothers suggested  
36 providing a conducive environment (good diet) for PrEP use whilst fathers suggested  
37 providing operational support (transport money). Cremin et al. and Irungu et al. reported that  
38 providing time-limited PrEP during periods of increased exposure would be a novel, efficient  
39 and cost-effective strategy for providing PrEP.<sup>57,58</sup>  
40  
41  
42  
43  
44  
45  
46  
47  
48

## 49 **Discussion**

50  
51 The purpose of this review was to synthesize and appraise the effects on PrEP initiation and  
52 the acceptability and feasibility of PrEP SDMs designed to promote linkage to care among  
53 AGYW and men eligible for PrEP in SSA. Given the challenging interactions between AGYW  
54 and men and the health system, we reviewed evidence of PrEP initiation in a range of SDMs  
55 i.e., health facility-, mobile-, community- based or hybrid models, and we explored the  
56 perceptions, barriers, and facilitators of these models. This scoping review identified 27  
57 primary studies and 10 conference abstracts.  
58  
59  
60

1  
2  
3  
4  
5 Delivery of PrEP to AGYW included HF-B models which integrated PrEP into routine FP/MCH/  
6 SRH/ANC services, hybrid models which allowed AGYW to initiate PrEP either at community-  
7 based venues or private or public facilities and mobile models. Whereas integrated models  
8 provided at a public health facility offer a potential “one-stop” location for AGYW to initiate  
9 PrEP whilst accessing other services, the additional time spent on PrEP-related activities may  
10 deter AGYW from initiation. Integrated delivery of PrEP provides an opportunity to respond  
11 to potential syndemics in AGYW who are eligible for PrEP; however, we found mixed results  
12 regarding the effectiveness of integrated models on PrEP initiation. Two studies in which PrEP  
13 was initiated in an FP or MCH clinic showed PrEP initiation of <50% with uptake being higher  
14 in women >24 years.<sup>26,28</sup> A third multi-country study which integrated PrEP with SRHS at FP  
15 clinics showed 90% PrEP uptake.<sup>31</sup> These studies were primarily implementation studies  
16 without a comparator, and PrEP related activities were provided by a PrEP-dedicated nurse.  
17 This task-shifting strategy removed this additional service from the workload of already  
18 overburdened routine nurses; however, the feasibility of this approach requires further  
19 evaluation considering the human resources challenges in SSA.  
20  
21  
22  
23  
24  
25

26  
27 Adolescent-friendly clinics or adolescent-friendly sections within health facilities were also  
28 shown to promote uptake of PrEP.<sup>25,31,33</sup> However, a New York study of adolescents’ PrEP  
29 awareness showed that 86% of adolescents eligible for PrEP reported never being informed  
30 about PrEP by their healthcare professionals.<sup>64</sup> Taggart et al. found that provider attitudes  
31 and recommendations within a healthcare facility influence adolescents’ willingness or  
32 unwillingness to use PrEP.<sup>65</sup> Our results show that AGYW favour community-based youth-  
33 friendly delivery modalities of PrEP such as DICEs or schools over delivery via public and  
34 private health facilities. These findings concur with other studies which have shown that  
35 factors that influence US women's decision-making about the use of PrEP include the ease of  
36 accessing services and medication close to their homes.<sup>66,67</sup> Moreover, women highlighted  
37 the importance of community peers in influencing their decisions to initiate PrEP.<sup>67</sup>  
38  
39  
40  
41  
42  
43

44 We identified only one study among young, heterosexual men that explored the hypothetical  
45 perceptions of PrEP uptake. Men reported that if PrEP was available, they would use it.  
46 However, uptake was dependent on SDM and a HF-B model was not favoured due to  
47 community stigma.<sup>36</sup> Heterosexual men are not classified as a key or vulnerable population in  
48 the HIV prevention response, as such research that focuses on the uptake of PrEP or SDMs  
49 among heterosexual men is limited.  
50  
51  
52

53 In studies that targeted both women (including AGYW) and men, SDMs included a hybrid  
54 approach (research site-community or community-health facility), community-based models  
55 and those based at research sites. PrEP delivery to serodiscordant couples involved integrated  
56 models such as delivery of PrEP and ART to serodiscordant couples allows both partners to  
57 interact with the health system. In such models, PrEP is initiated and continued only until the  
58 HIV infected partner achieves viral suppression which may be a cost-effective approach if viral  
59  
60

1  
2  
3 suppression is achieved timeously.<sup>49</sup> However, in a sub-Saharan setting where <65% of people  
4 living with HIV have suppressed viral load (VL) (<1000 copies/mL) and there are health  
5 systems challenges with VL testing and turn-around-time, integrated delivery of PrEP and ART  
6 may not be feasible.<sup>1,68</sup> Our findings have shown that community-based models which involve  
7 same-day HIV testing and PrEP initiation are favourable especially among men.<sup>40</sup>  
8 Furthermore, the delivery of PrEP through innovative community-based venues such as hair  
9 salons which provided a comfortable and familiar environment yielded high interest in PrEP  
10 initiation.<sup>46</sup> Many participants reported the convenience of pharmacies located close to public  
11 transport routes, as many did not have access to cars or did not want to bear the cost of fuel  
12 incurred travelling to the clinic.<sup>69</sup>  
13  
14  
15  
16  
17

18 Both AGYW, men and serodiscordant couples have expressed that PrEP initiation is influenced  
19 by the setting i.e., a friendly environment and by the attitude of healthcare workers i.e., non-  
20 judgmental/non-stigmatizing.<sup>31,38</sup> This suggests that the successful delivery of PrEP to AGYW  
21 or men using HF-B models either through integrated or standalone approaches requires  
22 healthcare workers to play an essential role.<sup>62,63</sup> Structural barriers to PrEP initiation included:  
23 the distance to travel to and time spent at health facilities. To address these barriers, there  
24 is an increasing need for differentiated SDMs that provide alternative access options  
25 especially considering that PrEP is a prevention intervention delivered to individuals who are  
26 generally of good health and who may be disinclined to travel long distances and wait in long  
27 queues to access PrEP.<sup>70</sup>  
28  
29  
30  
31

### 32 *Policy and programme recommendations and future research areas*

33  
34 Notably, literature on PrEP SDMs for AGYW and more especially heterosexual men is limited  
35 thus calling for more research in these areas. In order to increase PrEP uptake, country  
36 programme implementers need to understand which SDM/s work for AGYW or men and to  
37 adapt these to best suit the unique needs of the users.<sup>71</sup> Opportunities exist for integrated  
38 strategies of PrEP delivery at a health facility or mobile clinic. However, we need to  
39 understand which integrated strategy (e.g., integration with ART, SRHS, or contraceptive  
40 services) is most acceptable and scalable for AGYW and men. Training and retraining of  
41 healthcare workers on PrEP guidelines is essential to equip them with the skills to ensure that  
42 PrEP is delivered in a friendly and safe space by non-stigmatizing healthcare workers. To  
43 mitigate the time burden and travel expenses incurred by AGYW and men, same-day initiation  
44 of PrEP to those eligible and multi-months dispensing of refills should be considered.<sup>11,70,72</sup>  
45  
46  
47  
48  
49

50 Furthermore, task-shifting among healthcare workers along the PrEP cascade will avoid  
51 additional burden on the health system. Further studies are required to evaluate the  
52 feasibility of PrEP-dedicated nurses. Differentiated SDMs are needed to take PrEP to where  
53 users live, socialise and work.<sup>11</sup> These models include home deliveries, pharmacies, DICES,  
54 salons, mobile clinics and tele-medicine-assisted models in both the public and private health  
55 sectors. Mobile clinics near schools could be successful but need to be regular, reliable, and  
56 sustainable. Furthermore, considering that eligibility for continuation on PrEP requires repeat  
57  
58  
59  
60

1  
2  
3 HIV testing, there is a need for interventions (e.g., HIV self-testing) to address this challenge  
4 when PrEP is delivered at non- HF-B settings.  
5  
6

### 7 **Limitations**

8 The strengths of this review include the inclusion of multiple databases across disciplines and  
9 broad inclusion criteria. We also used a comprehensive search strategy that followed the JBI  
10 reviewer's manual and structured using PRISMA-ScR guidelines, and robust methods that  
11 included double data screening, extraction, and review. Another strength is that we included  
12 grey literature and unpublished reports which minimizes the chances of missing studies with  
13 negative or null findings. Limitations include the exclusion of studies conducted in non-SSA  
14 and that were published in non-English languages. In addition, due to a lag in adding and  
15 indexing articles in various online databases, our review could fail to locate the most recent  
16 publications and research on SDMs for PrEP uptake. Another limitation was that most of the  
17 included studies were from 3 countries (Kenya, Uganda, and South Africa) hence the  
18 generalisability of the results to SSA might be limited. Furthermore, many of the studies  
19 evaluated the hypothetical perceptions of PrEP uptake which may not translate to actual  
20 realities.  
21  
22  
23  
24  
25  
26  
27

### 28 **Conclusions**

29 We conducted a scoping review on PrEP SDMs, summarising evidence on PrEP initiation using  
30 existing models among AGYW and men and explored the users' perceptions, and barriers and  
31 facilitators of these models. These models were mostly found to be hybrid approaches  
32 (research site-health facility or community-health facility), community-based or based at a  
33 research site. Community-based models at convenient locations were favoured by both  
34 AGYW and men. Integrated strategies delivered at friendly health facilities by non-  
35 stigmatising healthcare providers was also a preferred PrEP delivery channel. The successful  
36 uptake of PrEP by AGYW and men will be dependent on the service setting where it is offered  
37 and cannot be considered as a one size fits all approach. Care must be taken to find the  
38 delivery method best suited to each sub-population. Future research should focus on what  
39 differentiated SDMs work for AGYW and heterosexual men to identify which approach is most  
40 successful in improving PrEP uptake and to understand their individual needs when using  
41 these models.  
42  
43  
44  
45  
46  
47  
48  
49  
50  
51  
52  
53  
54  
55  
56  
57  
58  
59  
60

### **Funding**

This work was supported by the U.S. President's Emergency Plan for AIDS Relief (PEPFAR) through the Centers for Disease Control and Prevention, under the terms of Cooperative Agreement Number 1 NU2GGH002193-01-00.

### **Disclaimer**

The findings and conclusions in this manuscript are those of the authors and do not necessarily represent the official position of the US Centers for Disease Control and Prevention.

### **Author Contributions:**

All authors contributed to conceptualising and designing the study. WC and TR conducted the literature search. WC, TR, KJ, NJ, DG independently performed screening. WC, TR, CM, EN, ET, MH, TMA, NJ, DG, BZ independently performed data extraction. EN developed the data charting form on REDCap. WC and TR performed initial data synthesis and interpretation and all authors refined it. WC and TR drafted the manuscript. All authors contributed to writing and reviewing the manuscript.

**Competing Interests:** None declared

**Patient consent for publication:** Not required

**Data availability statement:** All data relevant to the study are included in the article or uploaded as supplementary information.

## References

1. UNAIDS. AIDSinfo 2020 [cited 2020 21 April]. Available from: <https://aidsinfo.unaids.org/> accessed 21 April 2020.
2. UNAIDS. We've got the power: Women, Adolescent girls and the HIV response 2019 [cited 2020 21 April]. Available from: [https://www.unaids.org/sites/default/files/media\\_asset/2020\\_women-adolescent-girls-and-hiv\\_en.pdf](https://www.unaids.org/sites/default/files/media_asset/2020_women-adolescent-girls-and-hiv_en.pdf) accessed 21 April 2020.
3. Pascoe L, Peacock D, Stemple L. Reaching men: addressing the blind spot in the HIV response. *Int J Mens Soc Comm Health* 2018;1(SP1):e57-e70.
4. Colvin CJ. Strategies for engaging men in HIV services. *Lancet HIV* 2019
5. UNAIDS. HIV prevention 2020 road map. Geneva: Joint United Nations Programme on HIV2017 [cited 2020 21 April]. Available from: [https://www.unaids.org/sites/default/files/media\\_asset/hiv-prevention-2020-road-map\\_en.pdf](https://www.unaids.org/sites/default/files/media_asset/hiv-prevention-2020-road-map_en.pdf) accessed 21 April 2020.
6. World Health Organization. Guidance on Pre-exposure oral prophylaxis (PrEP) for serodiscordant couples, men who have sex with men and transgender women at high risk of HIV. Geneva: World Health Organization, 2012.
7. World Health Organization. Consolidated guidelines on the use of antiretroviral drugs for treating and preventing HIV infection: recommendations for a public health approach. Geneva Switzerland: World Health Organization 2016.
8. Dunbar MS, Kripke K, Haberer J, et al. Understanding and measuring uptake and coverage of oral pre-exposure prophylaxis delivery among adolescent girls and young women in sub-Saharan Africa. *Sex Health* 2018;15(6):513-21.
9. Ajayi AI, Mudefi E, Yusuf MS, et al. Low awareness and use of pre-exposure prophylaxis among adolescents and young adults in high HIV and sexual violence prevalence settings. *Medicine* 2019;98(43)
10. Department of Health South Africa. Guidelines for Expanding Combination Prevention and Treatment Options: Oral Pre-Exposure Prophylaxis (PrEP) and Test and Treat (T&T), 2017.
11. O'Malley G, Barnabee G, Mugwanya K. Scaling-up PrEP Delivery in Sub-Saharan Africa: What Can We Learn from the Scale-up of ART? *Curr HIV/AIDS Rep* 2019;16(2):141-50.
12. Venter WD. Pre-exposure prophylaxis: the delivery challenge. *Front Public Health* 2018;6:188.
13. Arksey H, O'Malley L. Scoping studies: towards a methodological framework. *Int J Soc Res Methodol* 2005;8(1):19-32.
14. Mays N, Roberts E, Popay J. Synthesising research evidence 2001.
15. Aromataris E, Munn Z, (Editors). Joanna Briggs Institute Reviewer's Manual: The Joanna Briggs Institute, 2017.
16. Tricco AC, Lillie E, Zarin W, et al. PRISMA extension for scoping reviews (PRISMA-ScR): checklist and explanation. *Ann Intern Med* 2018;169(7):467-73.
17. World Bank. Sub-Saharan Africa 2019 [cited 2019 25 November]. Available from: <https://data.worldbank.org/region/sub-saharan-africa> accessed 25 November 2019.
18. Ouzzani M, Hammady H, Fedorowicz Z, et al. Rayyan—a web and mobile app for systematic reviews. *Systematic reviews* 2016;5(1):1-10.
19. EndNote [program]. EndNote X7 version. Philadelphia, PA: Clarivate, 2013.

- 1
  - 2
  - 3
  - 4
  - 5
  - 6
  - 7
  - 8
  - 9
  - 10
  - 11
  - 12
  - 13
  - 14
  - 15
  - 16
  - 17
  - 18
  - 19
  - 20
  - 21
  - 22
  - 23
  - 24
  - 25
  - 26
  - 27
  - 28
  - 29
  - 30
  - 31
  - 32
  - 33
  - 34
  - 35
  - 36
  - 37
  - 38
  - 39
  - 40
  - 41
  - 42
  - 43
  - 44
  - 45
  - 46
  - 47
  - 48
  - 49
  - 50
  - 51
  - 52
  - 53
  - 54
  - 55
  - 56
  - 57
  - 58
  - 59
  - 60
20. Harris PA, Taylor R, Thielke R, et al. Research electronic data capture (REDCap)—a metadata-driven methodology and workflow process for providing translational research informatics support. *J Biomed Inform* 2009;42(2):377-81.
21. Cochrane Effective Practice and Organisation of Care (EPOC). Suggested risk of bias criteria for EPOC reviews. EPOC Resources for review authors 2017 [cited 2020 01 April]. Available from: <https://protect-za.mimecast.com/s/vgZ1C8qzwAFjg8EMlndz5c> accessed 01 April 2020.
22. Critical Appraisal Skills Programme. Qualitative Checklist 2018 [cited 2020 01 April]. Available from: <https://casp-uk.net/casp-tools-checklists/> accessed 01 April 2020.
23. Lewin S, Langlois E, Tuncalp Ö, et al. WEIRD (Ways of Evaluating Important and Relevant Data) tool: Questions to guide assessment / critical appraisal of programme descriptions, implementation descriptions and other mainly descriptive types of evidence Oslo: Norwegian Institute of Public Health 2019 [cited 2020 01 April]. Available from: [https://epoc.cochrane.org/sites/epoc.cochrane.org/files/public/uploads/Resources-for-authors2017/weird\\_tool.pdf](https://epoc.cochrane.org/sites/epoc.cochrane.org/files/public/uploads/Resources-for-authors2017/weird_tool.pdf) accessed 01 April 2020.
24. Moher D, Liberati A, Tetzlaff J, et al. Preferred Reporting Items for Systematic Reviews and Meta-Analyses: The PRISMA Statement. *PLoS Med* 2009;6(7):e1000097. doi: 10.1371/journal.pmed.1000097
25. Maseko B, Hill LM, Phanga T, et al. Perceptions of and interest in HIV pre-exposure prophylaxis use among adolescent girls and young women in Lilongwe, Malawi. *PLoS One* 2020;15(1):e0226062. doi: <https://doi.org/10.1371/journal.pone.0226062>
26. Mugwanya KK, Pintye J, Kinuthia J, et al. Integrating preexposure prophylaxis delivery in routine family planning clinics: A feasibility programmatic evaluation in Kenya. *PLoS Med* 2019;16(9) doi: <https://doi.org/10.1371/journal.pmed.1002885>
27. Pintye J, Kinuthia J, Allen Roberts D, et al. Integration of PrEP services into routine antenatal and postnatal care: Experiences from an implementation program in western Kenya. *J Acquir Immune Defic Syndr* 2018;79(5):590-95.
28. Kinuthia J, Pintye J, Abuna F, et al. Pre-exposure prophylaxis uptake and early continuation among pregnant and post-partum women within maternal and child health clinics in Kenya: results from an implementation programme. *Lancet HIV* 2020;7(1):E38-E48. doi: [https://doi.org/10.1016/S2352-3018\(19\)30335-2](https://doi.org/10.1016/S2352-3018(19)30335-2)
29. Motivations for early PrEP discontinuation among Kenyan adolescent girls and young women: a qualitative analysis. IAS 2019; 2019; Mexico City, Mexico.
30. Hill LM, Maseko B, Chagomerana M, et al. HIV risk, risk perception, and PrEP interest among adolescent girls and young women in Lilongwe, Malawi: operationalizing the PrEP cascade. *J Int AIDS Soc* 2020;23:e25502.
31. Travill D, Bekker L, Delany-Moretlwe S, et al. Sexual behavior and PrEP uptake among young African women in a demonstration project about PrEP delivery [abstract]. AIDS 2018. Amsterdam, Netherlands, 2018.
32. Ong'wen P, Musau A, D W, et al. Adolescent girls on PrEP: Findings from Kenya's oral PrEP scale-up supported by Jilinde [abstract]. IAS 2019. Mexico City, Mexico, 2019.
33. Rousseau E, Baeten J, Morton J, et al. Association between contraceptive use and PrEP uptake and continuation in adolescent girls and young women in Cape Town, South Africa [abstract]. IAS 2019. Mexico City, Mexico, 2019.
34. Delany-Moretlwe S, Chersich M, Harvey S, et al. Empowerment clubs did not increase PrEP continuation among adolescent girls and young women in South Africa and

- 1  
2  
3 Tanzania - Results from the EMPOWER randomised trial [abstract]. AIDS 2018.  
4 Amsterdam, Netherlands, 2018.
- 5  
6 35. Were D, Musau A, Mutegi J, et al. Using a HIV prevention cascade for identifying missed  
7 opportunities in PrEP delivery in Kenya: results from a programmatic surveillance  
8 study. *J Int AIDS Soc* 2020;23:e25537.
- 9  
10 36. Bell J, Sharma S, Hasen N, et al. Awareness of PrEP and drivers and barriers to use  
11 among men aged 20-34 in Mpumalanga and KwaZulu-Natal, South Africa [abstract].  
12 IAS 2019. Mexico City, Mexico, 2019.
- 13  
14 37. Heffron R, Thomson K, Celum C, et al. Fertility Intentions, Pregnancy, and Use of PrEP  
15 and ART for Safer Conception Among East African HIV Serodiscordant Couples. *AIDS*  
16 *Behav* 2018;22(6):1758-65.
- 17  
18 38. Ngure K, Heffron R, Curran K, et al. I Knew I Would Be Safer. Experiences of Kenyan HIV  
19 Serodiscordant Couples Soon After Pre-Exposure Prophylaxis (PrEP) Initiation. *AIDS*  
20 *Patient Care STDS* 2016;30(2):78-83.
- 21  
22 39. Koss CA, Ayieko J, Mwangwa F, et al. Early Adopters of Human Immunodeficiency Virus  
23 Preexposure Prophylaxis in a Population-based Combination Prevention Study in  
24 Rural Kenya and Uganda. *Clin Infect Dis* 2018;67(12):1853-60. doi:  
25 <https://doi.org/10.1093/cid/ciy390>
- 26  
27 40. Koss CA, Charlebois ED, Ayieko J, et al. Uptake, engagement, and adherence to pre-  
28 exposure prophylaxis offered after population HIV testing in rural Kenya and Uganda:  
29 72-week interim analysis of observational data from the SEARCH study. *Lancet HIV*  
30 2020
- 31  
32 41. Mayer CM, Owaraganise A, Kabami J, et al. Distance to clinic is a barrier to PrEP uptake  
33 and visit attendance in a community in rural Uganda. *J Int AIDS Soc*  
34 2019;22(4):e25276.
- 35  
36 42. Camlin CS, Koss CA, Getahun M, et al. Understanding Demand for PrEP and Early  
37 Experiences of PrEP Use Among Young Adults in Rural Kenya and Uganda: A  
38 Qualitative Study. *AIDS Behav* 2020
- 39  
40 43. Koss CA, Ayieko J, Owaraganise A, et al. Survey of Early Barriers to PrEP Uptake among  
41 Clients and Community Members in the SEARCH Study in Rural Kenya and Uganda  
42 [abstract]. IAS 2017. Paris, France, 2017.
- 43  
44 44. Gombe M, Cakouros B, Ncube G, et al. Key barriers and enablers associated with uptake  
45 and continuation of oral pre-exposure prophylaxis (PrEP) in the public sector in  
46 Zimbabwe: Qualitative perspectives of general population clients at high risk for HIV.  
47 *PLoS One* 2020;15(1) doi: <https://doi.org/10.1371/journal.pone.0227632>
- 48  
49 45. Bassett IV, Xu A, Govere S, et al. Contraception and PrEP in South African Hair Salons:  
50 Owner, Stylist, and Client Views. *J Acquir Immune Defic Syndr* 2018;79(2):E78-E81.  
51 doi: <https://dx.doi.org/10.1097%2FQAI.0000000000001794>
- 52  
53 46. Bassett IV, Govere S, Millham L, et al. Contraception, HIV Services, and PrEP in South  
54 African Hair Salons: A Qualitative Study of Owner, Stylist, and Client Perspectives. *J*  
55 *Community Health* 2019;44(6):1150-59.
- 56  
57 47. Lubwama J, Alamo S, Ajulong C, et al. Preexposure Prophylaxis for Key Populations In  
58 Uganda: Early Scale-Up Lessons [abstract]. CROI 2019. Seattle, Washington, 2019.
- 59  
60 48. Morton JF, Myers L, Gill K, et al. Evaluation of a behavior-centered design strategy for  
creating demand for oral PrEP among young women in Cape Town, South Africa.  
*Gates Open Res* 2020;4



- 1
- 2
- 3
- 4 49. Heffron R, Ngure K, Odoyo J, et al. Pre-exposure prophylaxis for HIV-negative persons
- 5 with partners living with HIV: uptake, use, and effectiveness in an open-label
- 6 demonstration project in East Africa. *Gates Open Res* 2018;1:3. doi:
- 7 <https://dx.doi.org/10.12688/gatesopenres.12752.2>
- 8
- 9 50. Ware NC, Pisarski EE, Nakku-Joloba E, et al. Integrated delivery of antiretroviral
- 10 treatment and pre-exposure prophylaxis to HIV-1 serodiscordant couples in East
- 11 Africa: a qualitative evaluation study in Uganda. *J Int AIDS Soc* 2018;21(5):e25113.
- 12
- 13 51. Atujuna M, Newman PA, Wallace M, et al. Contexts of vulnerability and the acceptability
- 14 of new biomedical HIV prevention technologies among key populations in South
- 15 Africa: A qualitative study. *PLoS One* 2018;13(2):e0191251. doi:
- 16 <https://doi.org/10.1371/journal.pone.0191251>
- 17
- 18 52. Baeten JM, Heffron R, Kidoguchi L, et al. Integrated Delivery of Antiretroviral Treatment
- 19 and Pre-exposure Prophylaxis to HIV-1-Serodiscordant Couples: A Prospective
- 20 Implementation Study in Kenya and Uganda. *PLoS Med* 2016;13(8) doi:
- 21 <https://dx.doi.org/10.1371/journal.pmed.1002099>
- 22
- 23 53. Heffron R, Ngure K, Velloza J, et al. Implementation of a comprehensive safer conception
- 24 intervention for HIV-serodiscordant couples in Kenya: uptake, use and effectiveness.
- 25 *J Int AIDS Soc* 2019;22(4) doi: <https://doi.org/10.1002/jia2.25261>
- 26
- 27 54. Minnis AM, Atujuna M, Browne EN, et al. Preferences for long-acting Pre-Exposure
- 28 Prophylaxis (PrEP) for HIV prevention among South African youth: results of a
- 29 discrete choice experiment. *J Int AIDS Soc* 2020;23(6):e25528.
- 30
- 31 55. Jani N, Pilgrim N, Saria V, et al. Will male partners of adolescent girls and young women
- 32 (AGYW) support their PrEP use? A comparative analysis of AGYW and male partners
- 33 of AGYW views in Tanzania [abstract]. AIDS 2018. Amsterdam, Netherlands, 2018.
- 34
- 35 56. Makyao N, Saria V, Jani N, et al. How will social norms about parenting influence
- 36 parental support of adolescent girls and young women's (AGYW) use of PrEP?
- 37 Perspectives from parents in Tanzania [abstract]. AIDS 2018. Amsterdam,
- 38 Netherlands, 2018.
- 39
- 40 57. Cremin I, Morales F, Jewell BL, et al. Seasonal PrEP for partners of migrant miners in
- 41 southern Mozambique: a highly focused PrEP intervention. *J Int AIDS Soc*
- 42 2015;18(4):19946.
- 43
- 44 58. Irungu EM, Sharma M, Maronga C, et al. The Incremental Cost of Delivering PrEP as a
- 45 Bridge to ART for HIV Serodiscordant Couples in Public HIV Care Clinics in Kenya.
- 46 *AIDS Res Treat* 2019;2019 doi: <https://doi.org/10.1155/2019/4170615>
- 47
- 48 59. Ngure K, Velloza J, Patel RC, et al. Alignment of PrEP use and effective contraceptive use
- 49 among East African women in HIV serodiscordant partnerships. *International Journal*
- 50 *of STD and AIDS* 2020;31(13):1263-71. doi: 10.1177/0956462420951501
- 51
- 52 60. Donnell D, Beesham I, Welch JD, et al. Incorporating oral PrEP into standard prevention
- 53 services for South African women: a nested interrupted time-series study. *Arch Sex*
- 54 *Behav* 2021 doi: 10.1007/s10508-020-01880-y
- 55 10.1016/s2352-3018(21)00048-5 [published Online First: 2021/05/07]
- 56
- 57 61. Sack DE, De Schacht C, Paulo P, et al. Pre-exposure prophylaxis use among HIV
- 58 serodiscordant couples: a qualitative study in Mozambique. *Global Health Action*
- 59 2021;14(1) doi: 10.1080/16549716.2021.1940764
- 60
62. Rubtsova A, M Wingood G, Dunkle K, et al. Young adult women and correlates of
- potential adoption of pre-exposure prophylaxis (PrEP): results of a national survey. *Curr HIV Res* 2013;11(7):543-48.

- 1  
2  
3  
4  
5  
6  
7  
8  
9  
10  
11  
12  
13  
14  
15  
16  
17  
18  
19  
20  
21  
22  
23  
24  
25  
26  
27  
28  
29  
30  
31  
32  
33  
34  
35  
36  
37  
38  
39  
40  
41  
42  
43  
44  
45  
46  
47  
48  
49  
50  
51  
52  
53  
54  
55  
56  
57  
58  
59  
60
63. Wingood GM, Dunkle K, Camp C, et al. Racial differences and correlates of potential adoption of pre-exposure prophylaxis (PrEP): results of a national survey. *J Acquir Immune Defic Syndr* 2013;63(0 1):S95.
64. 1288. Adolescents' Knowledge and Acceptance of Pre-exposure Prophylaxis (PrEP) in the Capital District Region of New York. *Open Forum Infect Dis*; 2018. Oxford University Press.
65. Taggart T, Liang Y, Pina P, et al. Awareness of and willingness to use PrEP among Black and Latinx adolescents residing in higher prevalence areas in the United States. *PLoS One* 2020;15(7):e0234821.
66. Aaron E, Blum C, Seidman D, et al. Optimizing delivery of HIV preexposure prophylaxis for women in the United States. *AIDS Patient Care STDs* 2018;32(1):16-23.
67. Auerbach JD, Kinsky S, Brown G, et al. Knowledge, attitudes, and likelihood of pre-exposure prophylaxis (PrEP) use among US women at risk of acquiring HIV. *AIDS Patient Care STDs* 2015;29(2):102-10.
68. Lecher S, Williams J, Fonjongo PN, et al. Progress with scale-up of HIV viral load monitoring—seven sub-Saharan African countries, January 2015–June 2016. *Morbidity and Mortality Weekly Report* 2016;65(47):1332-35.
69. Smith DK, Toledo L, Smith DJ, et al. Attitudes and program preferences of African-American urban young adults about pre-exposure prophylaxis (PrEP). *AIDS Educ Prev* 2012;24(5):408-21.
70. Sullivan PS, Mena L, Elore L, et al. Implementation strategies to increase PrEP uptake in the South. *Curr HIV/AIDS Rep* 2019;16(4):259-69.
71. Mugo NR, Ngunjiri K, Kiragu M, et al. PrEP for Africa: what we have learnt and what is needed to move to program implementation. *Curr Opin HIV AIDS* 2016;11(1):80.
72. Siegler AJ, Steehler K, Sales JM, et al. A Review of HIV Pre-exposure Prophylaxis Streamlining Strategies. *Curr HIV/AIDS Rep* 2020:1-11.

1  
2  
3  
4  
5  
6  
7  
8  
9  
10  
11  
12  
13  
14  
15  
16  
17  
18  
19  
20  
21  
22  
23  
24  
25  
26  
27  
28  
29  
30  
31  
32  
33  
34  
35  
36  
37  
38  
39  
40  
41

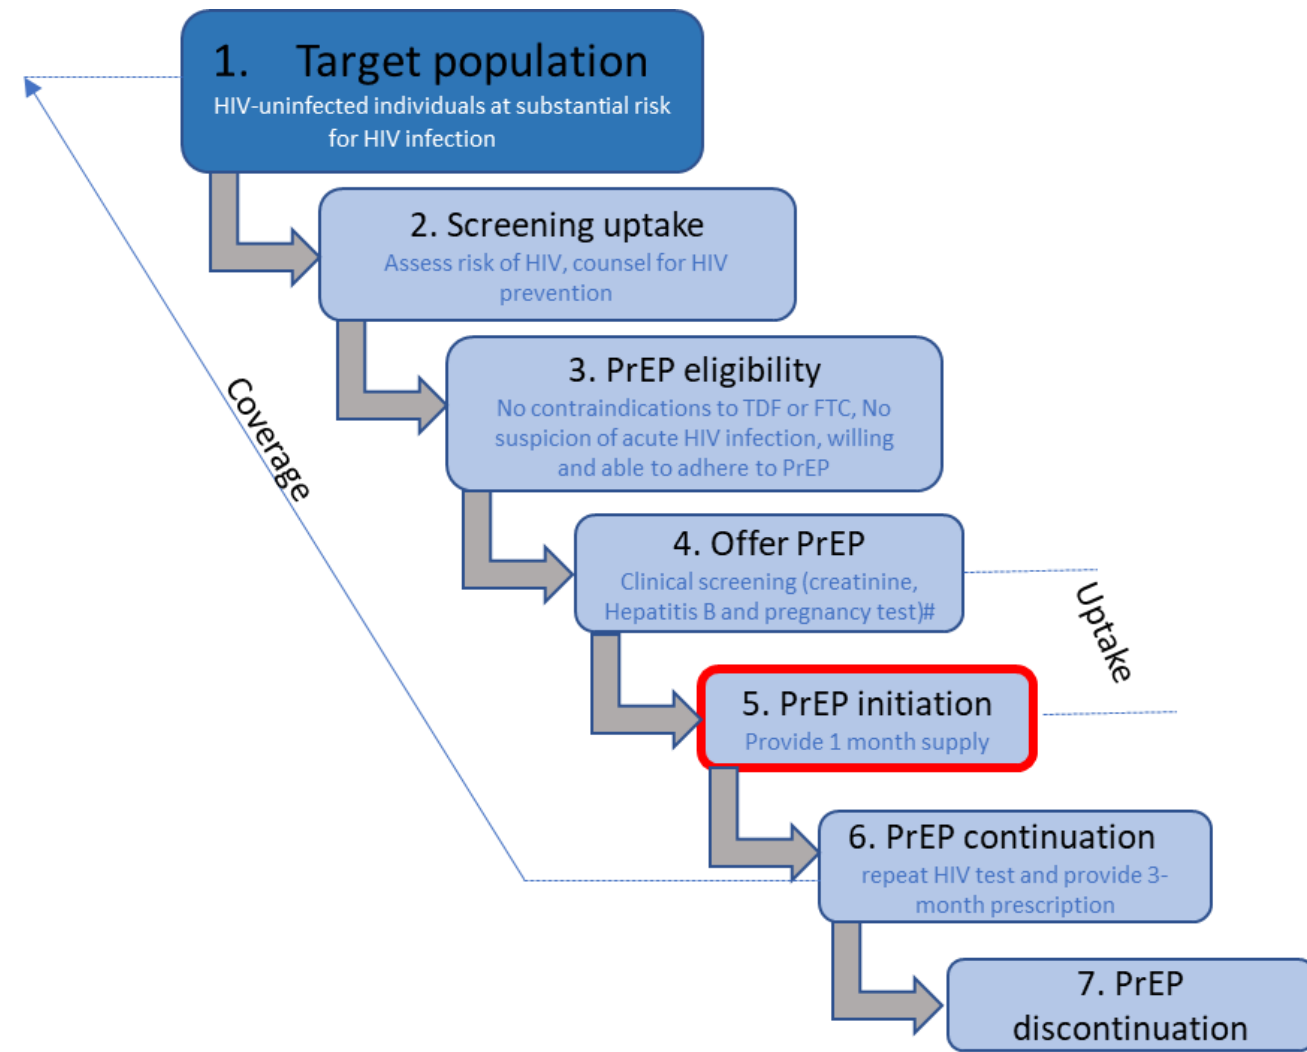

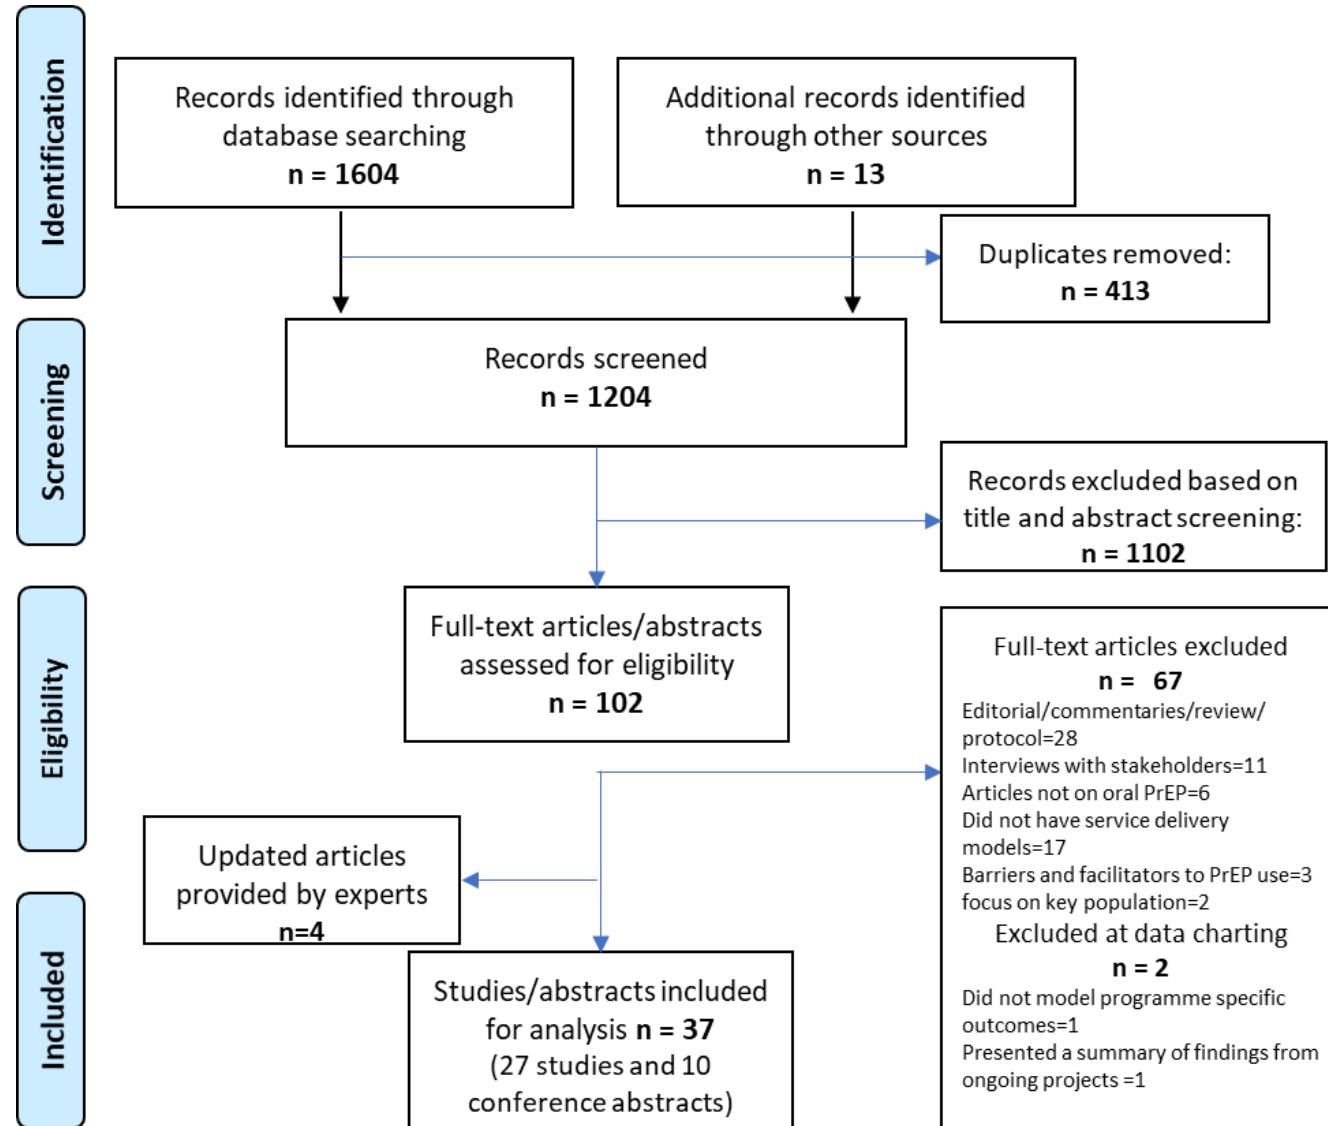

1  
2  
3  
4  
5  
6  
7  
8  
9  
10  
11  
12  
13  
14  
15  
16  
17  
18  
19  
20  
21  
22  
23  
24  
25  
26  
27  
28  
29  
30  
31  
32  
33  
34  
35  
36  
37  
38  
39  
40  
41

| SET |                                   | SEARCH TERMS                                                                     |
|-----|-----------------------------------|----------------------------------------------------------------------------------|
| 1   | <b>1 HIV</b>                      | HIV-1                                                                            |
| 2   |                                   | HIV                                                                              |
| 3   |                                   | Hiv                                                                              |
| 4   |                                   | Set 1- 3 will be combined with "or"                                              |
| 5   | <b>2 Pre-exposure Prophylaxis</b> | PRE-EXPOSURE PROPHYLAXIS                                                         |
| 6   |                                   | Pre-Exposure Prophylaxis                                                         |
| 7   |                                   | PrEP                                                                             |
| 8   |                                   | Set 5-7 will be combined with "or"                                               |
| 9   |                                   | Set 4 and 8 will be combined with "and"                                          |
| 10  | <b>3 Linkage to care</b>          | service provision                                                                |
| 11  |                                   | service delivery                                                                 |
| 12  |                                   | SDMs                                                                             |
| 13  |                                   | IMPLEMENTATION SCIENCE                                                           |
| 14  |                                   | model                                                                            |
| 15  |                                   | models of care                                                                   |
| 16  |                                   | differentiated care                                                              |
| 17  |                                   | linkage                                                                          |
| 18  |                                   | linkage to care                                                                  |
| 19  |                                   | intervention                                                                     |
| 20  |                                   | Set 10-19 will be combined with "or"                                             |
| 21  |                                   | Set 4, 9 and 20 will be combined with "and"                                      |
| 22  | <b>4 Country</b>                  | DEVELOPING COUNTRY                                                               |
| 23  |                                   | Sub-Saharan                                                                      |
| 24  |                                   | AFRICA SOUTH OF THE SAHARA                                                       |
| 25  |                                   | AFRICA                                                                           |
| 26  |                                   | <i>All sub-Saharan countries included as MeSH and text term combined with or</i> |
| 27  |                                   | Set 22-26 will be combined with "or"                                             |
| 28  |                                   | Set 4, 9, 20 and 27 will be combined with "and"                                  |

| Service Delivery Modality          | Author (Year) and study setting                   | Publication type and objectives                                                                                                                                                  | Study population and Sample                                                                                                                                                                                                                                                 | Intervention description                                                                                                                                                                                                                                                                                                                                                                                                                                                                                                                                                                                                                      | Detailed Description of Findings                                                                                                                                                                                                                                                                                                                                                                                                                                                                                                                                                                                                                                                                                                                                                                                                                                                                                                                                                                                |
|------------------------------------|---------------------------------------------------|----------------------------------------------------------------------------------------------------------------------------------------------------------------------------------|-----------------------------------------------------------------------------------------------------------------------------------------------------------------------------------------------------------------------------------------------------------------------------|-----------------------------------------------------------------------------------------------------------------------------------------------------------------------------------------------------------------------------------------------------------------------------------------------------------------------------------------------------------------------------------------------------------------------------------------------------------------------------------------------------------------------------------------------------------------------------------------------------------------------------------------------|-----------------------------------------------------------------------------------------------------------------------------------------------------------------------------------------------------------------------------------------------------------------------------------------------------------------------------------------------------------------------------------------------------------------------------------------------------------------------------------------------------------------------------------------------------------------------------------------------------------------------------------------------------------------------------------------------------------------------------------------------------------------------------------------------------------------------------------------------------------------------------------------------------------------------------------------------------------------------------------------------------------------|
| <b>Studies among AGYW</b>          |                                                   |                                                                                                                                                                                  |                                                                                                                                                                                                                                                                             |                                                                                                                                                                                                                                                                                                                                                                                                                                                                                                                                                                                                                                               |                                                                                                                                                                                                                                                                                                                                                                                                                                                                                                                                                                                                                                                                                                                                                                                                                                                                                                                                                                                                                 |
| <b>Health facility<sup>a</sup></b> | Maseko et al. (2020) <sup>25</sup><br><br>Malawi  | Manuscript<br><br>To understand knowledge of, interest in, concerns about, and delivery preferences for PrEP among AGYW enrolled in the Girl Power study.                        | <b>Study population:</b><br>Never been offered to use PrEP services (hypothetical opinions related to PrEP)<br><b>Sample</b><br><b>Sample size (total – N):</b> 40<br><b>Gender distribution:</b><br>Female: 100%<br><b>Age distribution:</b><br>15-19yrs: 21; 20-24yrs: 19 | <b>Nature of Intervention:</b> Four models of service-delivery were compared in four separate clinics: Model 1) standard of care (SoC), Model 2) Integrated youth-friendly health services; Model 3) Model 2 plus a small-group behavioural intervention on; and Model 4) Model 3 plus a cash transfer (\$5.50/month).<br>An explanation of PrEP was provided to 40 participants prior to IDI<br><b>Intervention components:</b> HIV testing, syndromic management of STIs, family planning, and condom distribution.<br><b>NB:</b> PrEP was not provided in this study, nor was it available in government clinics at the time of the study. | <ul style="list-style-type: none"> <li>• Interest in PrEP based on a belief that their HIV risk exposure was due to factors that were out of their control, including partners having concurrent relationships, challenges with condom negotiation/use, and rape.</li> <li>• Disinterest in PrEP included: perception of low risk because of abstinence or having a single partner, use of PrEP implying infidelity among married AGYW, taking pills daily implying HIV infection.</li> <li>• Interest in initiating PrEP depends upon: <ul style="list-style-type: none"> <li>- ease of accessing PrEP (confidential),</li> <li>- packaging attributes (discrete, cartons, packets, or bottles that would give the appearance of medications for common ailments preferred</li> <li>- delivery context (available in locations frequented by youth such as schools or youth friendly spaces because of ease of access and comfort in the absence of adult patients and family members).</li> </ul> </li> </ul> |
| <b>Health facility<sup>b</sup></b> | Mugwanya et al. (2019) <sup>26</sup><br><br>Kenya | Manuscript<br><br>To demonstrate the feasibility of integrating PrEP delivery within routine family planning clinics to reach at-risk AGYW for PrEP in HIV high burden settings. | <b>Study population:</b><br>Offered to use PrEP services<br><b>Sample</b><br><b>Sample size (total – N):</b> 1271<br><b>Gender distribution:</b><br>Female: 100%<br><b>Age distribution:</b><br>Median: 25 (22-29)<br><20: 105<br>20-24: 522<br>25-29: 356<br>30-34: 172    | <b>Nature of Intervention:</b> PrEP-dedicated nurse-led integrated delivery of PrEP in family planning clinics<br><b>Intervention components:</b> Newly hired nurses were trained on HIV risk assessment, counselling, and PrEP provision. These nurses performed only these duties at the FP clinic. Women attending FP clinics completed other services were then referred to the PrEP-dedicated nurse. This nurse counselled and assessed                                                                                                                                                                                                  | <ul style="list-style-type: none"> <li>• Of 1,271 women screened, 22% initiated PrEP, and 41% returned for at least one refill.</li> <li>• PrEP uptake was independently associated with reported male-partner HIV status (<math>p &lt; 0.001</math>) and marital status (<math>p = 0.04</math>).</li> <li>• More women &gt;24 years (26%) initiated PrEP compared to young women &lt;24 years (16%).</li> <li>• For women &gt;24 years, the likelihood of initiating PrEP increased by about 3% for each additional year of a woman's age (<math>p &lt; 0.001</math>).</li> </ul>                                                                                                                                                                                                                                                                                                                                                                                                                              |

|                                    |                                                   |                                                                                                                                                       |                                                                                                                                                                                                                                                  |                                                                                                                                                                                                                                                                                                                                                                                                                                                                                                                                                                                                                                                                                                                                                  |                                                                                                                                                                                                                                                                                                                                                                                                                                                                                                                                                                                                                                                                                                                                                                                                                                                                                                                                                                                                |
|------------------------------------|---------------------------------------------------|-------------------------------------------------------------------------------------------------------------------------------------------------------|--------------------------------------------------------------------------------------------------------------------------------------------------------------------------------------------------------------------------------------------------|--------------------------------------------------------------------------------------------------------------------------------------------------------------------------------------------------------------------------------------------------------------------------------------------------------------------------------------------------------------------------------------------------------------------------------------------------------------------------------------------------------------------------------------------------------------------------------------------------------------------------------------------------------------------------------------------------------------------------------------------------|------------------------------------------------------------------------------------------------------------------------------------------------------------------------------------------------------------------------------------------------------------------------------------------------------------------------------------------------------------------------------------------------------------------------------------------------------------------------------------------------------------------------------------------------------------------------------------------------------------------------------------------------------------------------------------------------------------------------------------------------------------------------------------------------------------------------------------------------------------------------------------------------------------------------------------------------------------------------------------------------|
|                                    |                                                   |                                                                                                                                                       | ≥35: 116                                                                                                                                                                                                                                         | willingness to consider PrEP (guided by a national guidelines and HIV risk assessment screening tool). Interested and medically eligible women were provided same-day PrEP initiation.                                                                                                                                                                                                                                                                                                                                                                                                                                                                                                                                                           | <ul style="list-style-type: none"> <li>• FP clinics can be an effective platform to efficiently reach HIV at-risk women who may benefit from PrEP.</li> <li>• Integration of PrEP delivery in FP clinics, makes this a potential "one-stop" location for FP and PrEP.</li> <li>• Although FP visits are busy, efficient implementation strategies such as less frequent PrEP visits and expanding the pool of providers who might be able to screen and provide PrEP beyond the few clinicians and nurses (e.g., training and empowering HIV testing counsellors and community health workers or peer educators) can be built into existing routine services.</li> </ul>                                                                                                                                                                                                                                                                                                                       |
| <b>Health facility<sup>b</sup></b> | Pintye et al. (2018) <sup>27</sup><br><br>Kenya   | Manuscript<br><br>To define approaches for integrating PrEP into routine antenatal and post-natal care (ANC/PNC) using PrIYA Program as a case study. | <b>Study population:</b> Offered to use PrEP services<br><b>Sample</b><br><b>Sample size (total – N):</b> 16 Health facilities; 40 program-supported nurses<br><b>Gender distribution:</b> Female 100%<br><b>Age distribution:</b> not described | <b>Nature of Intervention:</b> Nurse-led teams worked with maternal and child health (MCH) staff at 16 public, faith-based, and private facilities to determine optimal clinic flow for PrEP integration into antenatal (ANC) and postnatal (PNC) care. A program-dedicated nurse facilitated integration.<br><b>Intervention components:</b> All ANC/PNC clients received assessment for behavioural risk (completion of a questionnaire and willingness to consider PrEP, general informational counselling on PrEP depending on the client's awareness and interest in PrEP. Among clients who were willing to initiate PrEP, PrEP counselling also included information on how to use PrEP and adherence as well as medication dispensation. | <ul style="list-style-type: none"> <li>• Clinics developed two approaches for integrating PrEP delivery within ANC/PNC: 1) co-delivery: ANC/PNC and PrEP services delivered by same MCH nurse or 2) sequential services: PrEP services after ANC/PNC by a PrEP-specialized nurse.</li> <li>• 86 ANC/PNC visits were observed.</li> <li>• Clients who initiated PrEP took a median of 18 minutes (IQR 15-26) for PrEP-related activities (risk assessment, PrEP counselling, creatinine testing, dispensation, and documentation) in addition to other routine ANC/PNC activities.</li> <li>• For clients who declined PrEP, an additional 13 minutes (IQR 7-15) was spent on PrEP-related risk assessment and counselling.</li> <li>• PrEP-specific activities took &lt;20 minutes per client, the moderate additional time burden for PrEP initiation in MCH would likely decline with community awareness and innovations such as group/peer counselling or expedited dispensing.</li> </ul> |
| <b>Health facility</b>             | Kinuthia et al. (2020) <sup>28</sup><br><br>Kenya | Manuscript<br><br>We implemented and evaluated a novel programme                                                                                      | <b>Study population:</b> Offered to use PrEP services<br><b>Sample</b><br><b>Sample size (total – N):</b> 9376 women                                                                                                                             | <b>Nature of Intervention:</b> Integration of PrEP into existing structures at 16 maternal and child health clinics (public, faith-based, and private sector) At each facility,                                                                                                                                                                                                                                                                                                                                                                                                                                                                                                                                                                  | <ul style="list-style-type: none"> <li>• PrEP initiation: 2030 (21.7%) women-initiated PrEP: 79.3% women with partners living with HIV, 37.2% with partners of unknown HIV status, and 11.6% women with HIV-negative partners.</li> </ul>                                                                                                                                                                                                                                                                                                                                                                                                                                                                                                                                                                                                                                                                                                                                                      |

|                        |                                                 |                                                                                                                                       |                                                                                                                                                                                                                                                                                                                                                                           |                                                                                                                                                                                                                                                                                                                                                                                                                                                                                                                                                                                                                                                                                                                  |                                                                                                                                                                                                                                                                                                                                                                                                                                                                                                                                                                                                                                                                                                                                                                                                                                                                                                                                                                                                                                                                                                                                                                                                                                                                                                                        |
|------------------------|-------------------------------------------------|---------------------------------------------------------------------------------------------------------------------------------------|---------------------------------------------------------------------------------------------------------------------------------------------------------------------------------------------------------------------------------------------------------------------------------------------------------------------------------------------------------------------------|------------------------------------------------------------------------------------------------------------------------------------------------------------------------------------------------------------------------------------------------------------------------------------------------------------------------------------------------------------------------------------------------------------------------------------------------------------------------------------------------------------------------------------------------------------------------------------------------------------------------------------------------------------------------------------------------------------------|------------------------------------------------------------------------------------------------------------------------------------------------------------------------------------------------------------------------------------------------------------------------------------------------------------------------------------------------------------------------------------------------------------------------------------------------------------------------------------------------------------------------------------------------------------------------------------------------------------------------------------------------------------------------------------------------------------------------------------------------------------------------------------------------------------------------------------------------------------------------------------------------------------------------------------------------------------------------------------------------------------------------------------------------------------------------------------------------------------------------------------------------------------------------------------------------------------------------------------------------------------------------------------------------------------------------|
|                        |                                                 | to provide PrEP in maternal and child health clinics in Kenya                                                                         | <p><b>Gender distribution:</b><br/>Female:100%</p> <p><b>Age distribution:</b><br/>&lt;24: 5033<br/>Median age: 24 years (IQR: 21-28)</p>                                                                                                                                                                                                                                 | <p>they offered sensitisation sessions to introduce the programme, educate facility staff on PrEP, and seek advice on the best way to integrate PrEP delivery at the facility.</p> <p><b>Intervention components:</b><br/>Programme nurses approached all eligible women provided PrEP counselling as part of routine maternal and child health clinic processes. Risk was assessed using a using a risk assessment tool<br/>Women who did not know the HIV status of their partners were offered HIV self-testing kits, if they were willing to test with their partners at home. All women (regardless of risk factors) were informed that PrEP was available if they perceived they were at risk for HIV.</p> | <ul style="list-style-type: none"> <li>• 999 (49.2%) women who initiated PrEP were younger than 24 years</li> <li>• Reasons for initiating PrEP: having a partner living with HIV or of unknown HIV status and feeling at risk for acquiring HIV. Reasons for declining PrEP: need to consult partner and low perceived HIV risk<br/>Factors associated with initiation: being younger than 24 years, having a partner living with HIV or of unknown HIV status, gestational age less than 26 weeks among pregnant women, having experienced intimate partner violence in the previous 6 months, or sharing needles while engaging in injection drug use, diagnosed or treated for an STI, forced to have sex, and had recurrently used PEP.</li> <li>• PrEP continuation: 38.7% of 2030 women returned for PrEP refill at least 1 month after initiation</li> <li>• Factors associated with continuation: women with HIV-positive partners.</li> <li>• Reasons for discontinuation: side effects, no longer perceiving HIV risk, and partner known to be HIV-negative.</li> <li>• PrEP refills: 21.7% of women who initiated PrEP at least 3 months before this evaluation returned for PrEP refill. Of these 242 (54.9%) were younger than 24 years and 199 (45.1%) were aged 24 years or older (p=0.05).</li> </ul> |
| <b>Health facility</b> | Pintye et al. (2019) <sup>29</sup><br><br>Kenya | <p>Conference abstract</p> <p>To understand motivations for early PrEP discontinuation among AGYW and Adolescents (PrIYA) Program</p> | <p><b>Study population:</b><br/>Offered to use PrEP services</p> <p><b>Sample</b><br/><b>Sample size (total – N):</b><br/>69 AGYW<br/>69 in-depth interviews: 21 AGYW received, but never used PrEP • 24 discontinued PrEP within 1 month • 24 discontinued PrEP within 3 months</p> <p><b>Gender distribution:</b><br/>Females: 100%</p> <p><b>Age distribution:</b></p> | <p><b>Nature of Intervention:</b><br/>The PrIYA Program provides real world evidence on delivering PrEP to AGYW seeking routine ANC, PNC and family planning (FP) services within 16 MCH clinics in Kisumu County, Kenya</p> <p><b>Intervention components:</b><br/>N/A<br/>AGYW were identified by program nurses and purposively sampled based on 3 categories</p>                                                                                                                                                                                                                                                                                                                                             | <ul style="list-style-type: none"> <li>• Interest in initiating PrEP was heavily influenced by one-on-one interactions with a close friend, relative, or teacher/professor</li> <li>• Early PrEP discontinuation patterns were influenced by side effects (feared or experienced) and important life events AGYW frequently stopped PrEP after childbirth and found it challenging to remember to take PrEP during the complex transition to motherhood</li> <li>• AGYW reported that pre-initiation counselling focused on adherence; many were unaware that they could restart PrEP after stopping</li> </ul>                                                                                                                                                                                                                                                                                                                                                                                                                                                                                                                                                                                                                                                                                                        |



|                                                       |                                                                   |                                                                                                                                                                     |                                                                                                                                                                                                                                                                                                            |                                                                                                                                                                                                                                                                                                                                                                                                                                                                                                                                                                                                                                         |                                                                                                                                                                                                                                                                                                                                                                                                                                                                                                                                                                                                                                                                                                                                                                                                                                    |
|-------------------------------------------------------|-------------------------------------------------------------------|---------------------------------------------------------------------------------------------------------------------------------------------------------------------|------------------------------------------------------------------------------------------------------------------------------------------------------------------------------------------------------------------------------------------------------------------------------------------------------------|-----------------------------------------------------------------------------------------------------------------------------------------------------------------------------------------------------------------------------------------------------------------------------------------------------------------------------------------------------------------------------------------------------------------------------------------------------------------------------------------------------------------------------------------------------------------------------------------------------------------------------------------|------------------------------------------------------------------------------------------------------------------------------------------------------------------------------------------------------------------------------------------------------------------------------------------------------------------------------------------------------------------------------------------------------------------------------------------------------------------------------------------------------------------------------------------------------------------------------------------------------------------------------------------------------------------------------------------------------------------------------------------------------------------------------------------------------------------------------------|
|                                                       |                                                                   |                                                                                                                                                                     | Age (years) 22 (20-23)                                                                                                                                                                                                                                                                                     |                                                                                                                                                                                                                                                                                                                                                                                                                                                                                                                                                                                                                                         | <ul style="list-style-type: none"> <li>Messaging on stopping/restarting PrEP tailored to life events common among AGYW, such as childbirth and periods away from partners, could promote appropriate PrEP use</li> </ul>                                                                                                                                                                                                                                                                                                                                                                                                                                                                                                                                                                                                           |
| <b>Health facility<sup>a</sup></b>                    | Hill et al (2020) <sup>30</sup><br><br>Malawi                     | Manuscript<br><br>To understand the level of interest in PrEP among AGYW at highest HIV risk, and the potential role of perceived risk in motivating PrEP interest. | <p><b>Study population:</b><br/>Never been offered to use PrEP services (hypothetical opinions related to PrEP)</p> <p><b>Sample</b><br/><i>Sample size (total – N):</i> 825<br/><i>Gender distribution:</i><br/>Female: 100%<br/><i>Age distribution:</i><br/>Median: 20 [18 to 22] (range: 15 to 27)</p> | <p><b>Nature of Intervention:</b><br/>AGYW rated their potential interest in using PrEP after receiving this explanation: "PrEP is a medicine that can be used to prevent HIV for people who are HIV-negative. To be protected with PrEP, a pill is taken every day. These pills contain some of the same medicine used to treat people who already have HIV. PrEP is not currently available in Malawi."</p> <p><b>Intervention components:</b><br/>participants were enrolled and followed for one year.<br/><b>NB:</b> PrEP was not provided in this study, nor was it available in government clinics at the time of the study.</p> | <ul style="list-style-type: none"> <li>Epidemiologic risk scores were positively associated with PrEP interest, high numbers of AGYW both above and below the high-risk cut-off were very interested in PrEP (68% vs. 63%).</li> <li>Perceived risk partially explained the relationship between HIV risk and PrEP interest; greater epidemiologic HIV risk was associated with high perceived risk, which was in turn associated with PrEP interest.</li> <li>Many more high-risk AGYW were interested in PrEP (68%) than expressed a high level of perceived HIV risk (26%).</li> <li>High number of participants with risk scores below the high-risk cut-off who both expressed high perceived risk and interest in PrEP suggesting that demand for PrEP among AGYW may not be well aligned with epidemiologic risk</li> </ul> |
| <b>Mobile clinic/health facility<sup>c</sup></b>      | Travill et al. (2018) <sup>31</sup><br><br>Kenya and South Africa | Conference abstract<br><br>To assess PrEP uptake and sexual behaviour in the POWER cohort.                                                                          | <p><b>Study population:</b><br/>Offered to use PrEP services</p> <p><b>Sample</b><br/><i>Sample size (total – N):</i> 330<br/><i>Gender distribution:</i><br/>Female: 100%<br/><i>Age distribution:</i> Median age: 20.5 years (IQR:19-22)</p>                                                             | <p><b>Nature of Intervention:</b> PrEP was integrated with reproductive health services at family planning clinics (Kisumu, Kenya), an adolescent and youth-friendly clinic (Johannesburg, South Africa [SA]) and a mobile van for reproductive health services for youth (Cape Town, SA)</p> <p><b>Intervention components:</b> PrEP for AGYW</p>                                                                                                                                                                                                                                                                                      | <ul style="list-style-type: none"> <li>PrEP uptake at the initial visit was 90% across all sites.</li> <li>Two-thirds (68%) did not know their partners' HIV status and only 4% were in a known sero-discordant relationship.</li> <li>Main reasons for declining PrEP were fears of HIV stigma or partner reactions</li> <li>AGYW had evidence of high HIV risk using a risk score, indicating that women initiating PrEP would benefit from it.</li> <li>AGYW had high willingness to initiate PrEP when delivered in these youth-friendly settings.</li> </ul>                                                                                                                                                                                                                                                                  |
| <b>Hybrid (community-health facility)<sup>c</sup></b> | Ong'wen et al. (2018) <sup>32</sup><br><br>Kenya                  | Conference abstract<br><br>To know more about adolescent girls accessing                                                                                            | <p><b>Study population:</b><br/>Offered to use PrEP services</p> <p><b>Sample</b><br/><i>Sample size (total – N):</i> 1851<br/><i>Gender distribution:</i></p>                                                                                                                                             | <p><b>Nature of Intervention:</b><br/>PrEP integration through drop-in centres (DICEs), public and private clinics</p> <p><b>Intervention components:</b></p>                                                                                                                                                                                                                                                                                                                                                                                                                                                                           | <ul style="list-style-type: none"> <li>Among 28,268 clients initiating PrEP, 1851 (6.5%) were adolescent girls</li> <li>DICEs, clinics designed primarily for sex workers, were the preferred PrEP outlet for adolescent girls, with 66% accessing services in DICEs, 25% accessed</li> </ul>                                                                                                                                                                                                                                                                                                                                                                                                                                                                                                                                      |

|                                  |                                                                            |                                                                                                                                                                                  |                                                                                                                                                                                                       |                                                                                                                                                                                                                                                                                                                                                                                           |                                                                                                                                                                                                                                                                                                                                                                                                                                                                                                                                                                                                                                                                                                                                                                                                                          |
|----------------------------------|----------------------------------------------------------------------------|----------------------------------------------------------------------------------------------------------------------------------------------------------------------------------|-------------------------------------------------------------------------------------------------------------------------------------------------------------------------------------------------------|-------------------------------------------------------------------------------------------------------------------------------------------------------------------------------------------------------------------------------------------------------------------------------------------------------------------------------------------------------------------------------------------|--------------------------------------------------------------------------------------------------------------------------------------------------------------------------------------------------------------------------------------------------------------------------------------------------------------------------------------------------------------------------------------------------------------------------------------------------------------------------------------------------------------------------------------------------------------------------------------------------------------------------------------------------------------------------------------------------------------------------------------------------------------------------------------------------------------------------|
|                                  |                                                                            | routine PrEP services in the context of national scale-up programs.                                                                                                              | Females: 100%<br><b>Age distribution:</b><br>15-19 years                                                                                                                                              | The adolescents received either static or outreach services from 93 Jilinde supported clinics                                                                                                                                                                                                                                                                                             | PrEP services in public clinics and 9% in private clinics.<br><ul style="list-style-type: none"> <li>• Entry to PrEP was through peer educators and networks (50%); community outreaches (20%); and within health facilities (30%)</li> <li>• Efforts to make PrEP accessible to AGYW at risk of HIV acquisition should include restructuring the service delivery model</li> </ul>                                                                                                                                                                                                                                                                                                                                                                                                                                      |
| <b>Mobile clinic<sup>c</sup></b> | Rousseau et al. (2019) <sup>33</sup><br><br>South Africa                   | Conference abstract<br><br>Hypothesized that contraceptive use was associated with PrEP uptake and continuation in young women accessing sexual and reproductive health services | <b>Study population:</b><br>Offered to use PrEP services<br><b>Sample</b><br><b>Sample size (total – N):</b><br>1096<br><b>Gender distribution:</b><br>Female: 100%<br><b>Age distribution:</b> 16-25 | <b>Nature of Intervention:</b><br>Contraceptive use associated with PrEP uptake and continuation in AGYW accessing sexual and reproductive health services (SRHS) from a mobile clinic<br><b>Intervention components:</b> Sexual reproductive health service including HIV testing, contraception (oral, injectable and implant), and PrEP                                                | <ul style="list-style-type: none"> <li>• Among 1096 AGYW who accessed SRHS 31% initiated PrEP on the same day.</li> <li>• AGYW who were using contraception were significantly more likely to initiate PrEP on the same day compared to those who declined PrEP (76% vs 66% on contraception at that visit; p=0.001).</li> <li>• PrEP initiation was also significantly associated with contraception initiation; contraception was initiated by 44% of AGYW on the same day as PrEP initiation compared to 30% contraception starts in AGYW who declined PrEP (p=0.003).</li> <li>• AGYW's contraception use facilitated PrEP initiation and continuation, PrEP initiation also encouraged young women to initiate contraception use supporting the integration of SRHS with the provision of PrEP for AGYW.</li> </ul> |
| <b>Research site</b>             | Delany-Moretlwe et al. (2018) <sup>34</sup><br><br>South Africa & Tanzania | Conference abstract<br><br>To evaluate whether empowerment clubs increase PrEP uptake and continuation among AGYW.                                                               | <b>Study population:</b><br>Offered to use PrEP services<br><b>Sample</b><br><b>Sample size (total – N):</b><br>Female:100%<br><b>Age distribution:</b><br>Not mentioned                              | <b>Nature of Intervention:</b><br>Participants were randomised to standard of care (SoC), which included comprehensive sexual and reproductive health care, with counselling and SMS reminders for PrEP users, or to empowerment clubs plus SOC.<br><b>Intervention components:</b><br>Facilitators-led small group sessions and clinic follow-up visits for sexually active AGYW on PrEP | <ul style="list-style-type: none"> <li>• 431 AGYW enrolled and 213 randomised to clubs</li> <li>• 97% initiated PrEP</li> <li>• PrEP continuation did not vary significantly by study arm (p-value =0.31)</li> <li>• PrEP continuation was 73% at month 1, 61% at month 3 and 34% at month 6.</li> <li>• While PrEP uptake was high in this at-risk population, use diminished with time. Empowerment club participation was low and did not enhance PrEP continuation, contrary to experiences in the HIV treatment field.</li> </ul>                                                                                                                                                                                                                                                                                   |
| <b>Research Site</b>             | Donnell et al. (2021) <sup>34</sup>                                        | Manuscript<br><br>To assess the effect of on-site access to                                                                                                                      | <b>Study population:</b><br>Offered to use PrEP services<br><b>Sample</b>                                                                                                                             | <b>Nature of Intervention:</b><br>On-site PrEP access at nine trial sites provided by research staff                                                                                                                                                                                                                                                                                      | <ul style="list-style-type: none"> <li>• After on-site PrEP access began 543 (26%) out of 2124 reported PrEP use.</li> </ul>                                                                                                                                                                                                                                                                                                                                                                                                                                                                                                                                                                                                                                                                                             |

|                                                  |                                                    |                                                                                                                                                                                                                                      |                                                                                                                                                                                                                                                                                               |                                                                                                                                                                                                                                                                                                                                                                                                                                                                                                                                                                                                                                                                                                                                                         |                                                                                                                                                                                                                                                                                                                                                                                                                                                                                                                                                                                                                                                                                                                                                                                                                                                                                                                                                                                                                                                                                                                                                                                                                                                                                                                                                                                                                                                                                                                                            |
|--------------------------------------------------|----------------------------------------------------|--------------------------------------------------------------------------------------------------------------------------------------------------------------------------------------------------------------------------------------|-----------------------------------------------------------------------------------------------------------------------------------------------------------------------------------------------------------------------------------------------------------------------------------------------|---------------------------------------------------------------------------------------------------------------------------------------------------------------------------------------------------------------------------------------------------------------------------------------------------------------------------------------------------------------------------------------------------------------------------------------------------------------------------------------------------------------------------------------------------------------------------------------------------------------------------------------------------------------------------------------------------------------------------------------------------------|--------------------------------------------------------------------------------------------------------------------------------------------------------------------------------------------------------------------------------------------------------------------------------------------------------------------------------------------------------------------------------------------------------------------------------------------------------------------------------------------------------------------------------------------------------------------------------------------------------------------------------------------------------------------------------------------------------------------------------------------------------------------------------------------------------------------------------------------------------------------------------------------------------------------------------------------------------------------------------------------------------------------------------------------------------------------------------------------------------------------------------------------------------------------------------------------------------------------------------------------------------------------------------------------------------------------------------------------------------------------------------------------------------------------------------------------------------------------------------------------------------------------------------------------|
|                                                  | South Africa                                       | PrEP on HIV incidence.                                                                                                                                                                                                               | <p><b>Sample size (total – N):</b>2121</p> <p><b>Gender distribution:</b><br/>Female:100%</p> <p><b>Age distribution:</b><br/>16-35 years; median age: 23 years (IQR 20-27)</p>                                                                                                               | <p><b>Intervention components:</b> Research nurse provided PrEP</p>                                                                                                                                                                                                                                                                                                                                                                                                                                                                                                                                                                                                                                                                                     | <ul style="list-style-type: none"> <li>• HIV incidence was 2.16% after on-site PrEP access, compared with 4.65% before PrEP access (p=0.0085).</li> <li>• Future studies of HIV prevention should incorporate PrEP as part of the standard of prevention</li> </ul>                                                                                                                                                                                                                                                                                                                                                                                                                                                                                                                                                                                                                                                                                                                                                                                                                                                                                                                                                                                                                                                                                                                                                                                                                                                                        |
| <p><b>Hybrid (community-Health facility)</b></p> | <p>Were et al (2020)<sup>35</sup></p> <p>Kenya</p> | <p>Manuscript</p> <p>To describe the programmatic application of an oral PrEP cascade; to quantify progression across each step of the cascade for female sex workers (FSW), MSM and AGYW and, to identify missed opportunities.</p> | <p><b>Study population:</b><br/>Offered to use PrEP services</p> <p><b>Sample size (total – N):</b><br/>299,798</p> <p><b>Gender distribution:</b><br/>FSW: 211,927, MSM: 47,533 MSM and AGYW: 40,338</p> <p><b>Age distribution:</b><br/>AGYW: 15-24; FSW &gt;15 years; MSM:&gt;15 years</p> | <p><b>Nature of Intervention:</b><br/>Scaling up oral PrEP through integration into routine health services in drop-in centres (DICEs), public and private health facilities</p> <p><b>Intervention components:</b><br/>Individuals enter the PrEP pathway through community mobilization. Individuals who are interested in PrEP are referred to facilities providing PrEP, where they undergo HIV testing services. Clients who screen positive for substantial behavioural risk, or who request PrEP, are referred to an onsite clinician who conducts a clinical assessment and provides PrEP to clients who are eligible and opt-in. Clients are followed-up visit at the same facility one month following initiation and monthly thereafter.</p> | <p><b>Quantitative:</b></p> <ul style="list-style-type: none"> <li>• Among PrEP-eligible individuals, 2,900 (11%) AGYW, were initiated on PrEP. Of these clients, whereas 55% of AGYW were between 20 and 24 years.</li> <li>• Majority (81%) of clients-initiated PrEP through DICEs, whereas 14% and 5% were initiated through public and private facilities respectively.</li> <li>• PrEP cascade for AGYW aged 15-19 years: HIV-negative (99%), screened (22%), eligible (36%), initiation (95%), month 1 follow-up (31%), month 3 follow up (5%)</li> <li>• PrEP cascade for AGYW aged 20-24 years: HIV-negative (98%), screened (23%), eligible (34%), initiation (91%), month 1 follow-up (32%), month 3 follow up (5%)</li> <li>• AGYW had higher missed opportunities for screening (78%). Among those screened, a substantially higher proportion of AGYW (65%) were ineligible for PrEP.</li> <li>• Missed opportunities for PrEP initiation was 8% among AGYW.</li> <li>• Majority of AGYW did not persist on PrEP use at month-1 (68%) and month-3 (94%) follow-ups.</li> </ul> <p><b>Qualitative</b></p> <ul style="list-style-type: none"> <li>• Eligibility for PrEP: Poor rapport between AGYW and providers inhibits disclosure of risk behaviours. Peer mobilization and referral of low-risk individuals coupled with inadequate client education on PrEP.</li> <li>• Initiation of PrEP: Myths and misconceptions about PrEP and low risk perception among FSW, MSM and AGYW. Co-location of both PrEP and</li> </ul> |

|                                                            |                                                             |                                                                                                                                                       |                                                                                                                                                                                                                                                                                      |                                                                                                                                                                                                                                                                                                                                                     |                                                                                                                                                                                                                                                                                                                                                                                                                                                                                                                                                                                                                                                                                                                                                                                                                                                                                  |
|------------------------------------------------------------|-------------------------------------------------------------|-------------------------------------------------------------------------------------------------------------------------------------------------------|--------------------------------------------------------------------------------------------------------------------------------------------------------------------------------------------------------------------------------------------------------------------------------------|-----------------------------------------------------------------------------------------------------------------------------------------------------------------------------------------------------------------------------------------------------------------------------------------------------------------------------------------------------|----------------------------------------------------------------------------------------------------------------------------------------------------------------------------------------------------------------------------------------------------------------------------------------------------------------------------------------------------------------------------------------------------------------------------------------------------------------------------------------------------------------------------------------------------------------------------------------------------------------------------------------------------------------------------------------------------------------------------------------------------------------------------------------------------------------------------------------------------------------------------------|
|                                                            |                                                             |                                                                                                                                                       |                                                                                                                                                                                                                                                                                      |                                                                                                                                                                                                                                                                                                                                                     | HIV services in comprehensive care centres (HIV clinics) resulted in PrEP clients feeling stigmatized as HIV positive. Stigma-related discouragement from peers, family and friends for eligible users. Providers reluctance to prescribe PrEP associated with reluctance to increase provider workload; provider belief that client will not adhere to PrEP. Insensitive referral and access pathways in public and private health facilities.                                                                                                                                                                                                                                                                                                                                                                                                                                  |
| <b>Studies among Men</b>                                   |                                                             |                                                                                                                                                       |                                                                                                                                                                                                                                                                                      |                                                                                                                                                                                                                                                                                                                                                     |                                                                                                                                                                                                                                                                                                                                                                                                                                                                                                                                                                                                                                                                                                                                                                                                                                                                                  |
| <b>Not specified</b>                                       | Bell et al. (2019) <sup>36</sup><br><br>South Africa        | Conference abstract<br><br>To understand perceptions of PrEP, and barriers and enablers of uptake among young South African men.                      | <b>Study population:</b> Never been offered to use PrEP services (hypothetical opinions related to PrEP)<br><b>Sample</b><br><b>Sample size (total – N):</b> 2077 (Quantitative: 2019; Qualitative: 58)<br><b>Gender distribution:</b> Male: 100%<br><b>Age distribution:</b> 20-34  | <b>Nature of Intervention:</b> Perceptions of PrEP use and barriers and enablers of uptake. 58 IDIs<br><b>Intervention components:</b> N/A                                                                                                                                                                                                          | <ul style="list-style-type: none"> <li>• <b>Enablers to PrEP use:</b> <ul style="list-style-type: none"> <li>- Maintain an HIV-negative status</li> <li>- Avoid conflict and turmoil that HIV diagnosis would bring</li> <li>- High degree of enthusiasm towards the concept</li> </ul> </li> <li>• <b>Barriers to PrEP use:</b> <ul style="list-style-type: none"> <li>- Practical: remembering to take the pill daily, side effects and access to clinics.</li> <li>- Knowledge: Had basic information, confused PrEP with PEP</li> <li>- Psychological: perceived as "only for women" and health seeking behaviour is not the norm for men.</li> <li>- Social: Being seen at clinics by community members, as people will assume that they are HIV positive.</li> <li>- Interpersonal: Keep PrEP use a secret from their partners, friends and family.</li> </ul> </li> </ul> |
| <b>Studies among AGYW and Men</b>                          |                                                             |                                                                                                                                                       |                                                                                                                                                                                                                                                                                      |                                                                                                                                                                                                                                                                                                                                                     |                                                                                                                                                                                                                                                                                                                                                                                                                                                                                                                                                                                                                                                                                                                                                                                                                                                                                  |
| <b>Hybrid (research site- health facility)<sup>e</sup></b> | Heffron et al. (2018) <sup>37</sup><br><br>Kenya and Uganda | Manuscript<br><br>To explore fertility intentions, pregnancy, and evaluated the use of PrEP and ART as peri-conception HIV risk reduction strategies. | <b>Study population:</b> Offered to use PrEP services<br><b>Sample</b><br><b>Sample size (total – N):</b> 1013<br><b>Gender distribution:</b> HIV-infected females: 455; HIV-uninfected males: 224; HIV infected males: 110; HIV-uninfected females: 224<br><b>Age distribution:</b> | <b>Nature of Intervention:</b> The PrEP delivery model integrated PrEP into HIV treatment services. PrEP discontinuation was encouraged once the HIV-infected partner had used ART for at least 6 months (time to achieve HIV viral suppression).<br><br><b>Intervention components:</b> Couples-based HIV prevention counselling; safer conception | <ul style="list-style-type: none"> <li>• Uptake and adherence to integrated PrEP and ART strategy was high with an estimated 96% reduction in HIV incidence.</li> <li>• During the 6 months preceding pregnancy, 82.9% of couples used PrEP or ART and there were no HIV seroconversions, 14.5% used some ART and/or PrEP and 2.6% used neither PrEP nor ART.</li> <li>• Among the 81 couples who were using ART only (61 couples with HIV-infected women and 20 with HIV-infected men), 91.2% of the HIV-uninfected partners had discontinued PrEP due to sustained</li> </ul>                                                                                                                                                                                                                                                                                                  |

|                                                            |                                                          |                                                                                                                                                                             |                                                                                                                                                                                                                                                           |                                                                                                                                                                                                                                                                                                                                                                                                                                                                                                                                                             |                                                                                                                                                                                                                                                                                                                                                                                                                                                                                                                                                                                                                                                                                                                                                                                 |
|------------------------------------------------------------|----------------------------------------------------------|-----------------------------------------------------------------------------------------------------------------------------------------------------------------------------|-----------------------------------------------------------------------------------------------------------------------------------------------------------------------------------------------------------------------------------------------------------|-------------------------------------------------------------------------------------------------------------------------------------------------------------------------------------------------------------------------------------------------------------------------------------------------------------------------------------------------------------------------------------------------------------------------------------------------------------------------------------------------------------------------------------------------------------|---------------------------------------------------------------------------------------------------------------------------------------------------------------------------------------------------------------------------------------------------------------------------------------------------------------------------------------------------------------------------------------------------------------------------------------------------------------------------------------------------------------------------------------------------------------------------------------------------------------------------------------------------------------------------------------------------------------------------------------------------------------------------------|
|                                                            |                                                          |                                                                                                                                                                             | HIV-infected females: 26 (22-30);<br>HIV-uninfected males: 30 (26-37);<br>HIV-uninfected females: 29 (24-35);<br>HIV-infected males: 35 (30-42)                                                                                                           | counselling or contraceptives;<br>counselling and HIV testing for HIV-uninfected partner; PrEP initiation/prescription and adherence counselling; referral of HIV infected partner for ART                                                                                                                                                                                                                                                                                                                                                                  | (i.e., [6 months) ART use by their HIV infected partner.<br><ul style="list-style-type: none"> <li>• Integrated PrEP and ART was readily used by HIV serodiscordant couples.</li> <li>• Widespread scale-up of safer conception counselling and services is warranted to respond to strong desires for pregnancy among HIV-affected men and women.</li> </ul>                                                                                                                                                                                                                                                                                                                                                                                                                   |
| <b>Hybrid (research site- health facility)<sup>e</sup></b> | Ngure et al. (2016) <sup>38</sup><br><br>Kenya           | Manuscript<br><br>To gather insights into couples' decision-making, motivations for PrEP uptake, and experiences soon after PrEP initiation.                                | <b>Study population:</b> Offered to use PrEP services<br><b>Sample</b><br><b>Sample size (total – N):</b> 40<br><b>Gender distribution:</b> Female: 20; Male:20<br><b>Age distribution:</b> Females: 29.1 (20-43), Males: 36.6 (27-57)                    | <b>Nature of Intervention:</b> The PrEP delivery model integrated PrEP into HIV treatment services. PrEP discontinuation was encouraged once the HIV-infected partner had used ART for at least 6 months (time to achieve HIV viral suppression).<br><b>Intervention components:</b> At the time of interview: time since initiating PrEP was 6.3 months and time since initiating ART was 5.6 months                                                                                                                                                       | <ul style="list-style-type: none"> <li>• PrEP offered couples an additional strategy to reduce the risk of HIV transmission, meet their fertility desires, and cope with HIV serodiscordance.</li> <li>• Remaining HIV-negative at follow-up visits reinforced couples' decisions and motivated continued adherence to PrEP. Daily PrEP use supported the HIV-infected partners adherence to ART.</li> <li>• A positive clinical encounter (provider's advice and client-friendly services) motivated initiation and continuation of PrEP</li> </ul>                                                                                                                                                                                                                            |
| <b>Hybrid (community-health facility)<sup>d</sup></b>      | Koss et al. (2018) <sup>39</sup><br><br>Kenya and Uganda | Manuscript<br><br>To report on "early adopters" of PrEP in the Sustainable East Africa Research in Community Health (SEARCH) study in rural Uganda and Kenya. intervention. | <b>Study population:</b> Offered to use PrEP services<br><b>Sample</b><br><b>Population:</b> AGYW Men<br><b>Sample size (total – N):</b> 4064<br><b>Gender distribution:</b> 1934 females 2130 males<br>48% females 52% males<br><b>Age distribution:</b> | <b>Nature of Intervention:</b> PrEP education and discussions occurred on arrival at the health campaign, with HIV counsellors and clinicians. During home-based testing, 1 staff member conducted HIV testing and counselling and provided info about PrEP.<br><br><b>Intervention components:</b> 1-month community mobilization and sensitization activities on PrEP. PrEP risk score or was administered. Hybrid HIV and multi-disease testing was conducted (health campaigns & home-based) with counselling and health education discussions on PrEP. | <ul style="list-style-type: none"> <li>• Of 21 212 HIV-uninfected adults, 4064 were identified for PrEP (2991 by empiric risk score, 1073 by self-identified risk).</li> <li>• 739 individuals started PrEP within 30 days; 77% on the same day.</li> <li>• Among adults identified by risk score, predictors of early adoption included male sex (adjusted odds ratio 1.53; 95% confidence interval, 1.09-2.15), polygamy (1.92; 1.27-2.90), serodiscordant spouse (3.89; 1.18-12.76), self-perceived HIV risk (1.66; 1.28-2.14), and testing at health campaign versus home (5.24; 3.33-8.26).</li> <li>• Among individuals who self-identified for PrEP, predictors of early adoption included older age (2.30; 1.29-4.08) and serodiscordance (2.61; 1.01-6.76).</li> </ul> |

|                                                              |                                                                |                                                                                                                                                                     |                                                                                                                                                                                                                                                                                                                          |                                                                                                                                                                                                                                                                                                                                                                                                                                                                                                                                                                                                                                                                                                                                                                                                                                                                                                                                                                                                                                                                             |                                                                                                                                                                                                                                                                                                                                                                                                                                                                                                                                                                                                                                                                                                                                                                                                                                                                                                                                                                                            |
|--------------------------------------------------------------|----------------------------------------------------------------|---------------------------------------------------------------------------------------------------------------------------------------------------------------------|--------------------------------------------------------------------------------------------------------------------------------------------------------------------------------------------------------------------------------------------------------------------------------------------------------------------------|-----------------------------------------------------------------------------------------------------------------------------------------------------------------------------------------------------------------------------------------------------------------------------------------------------------------------------------------------------------------------------------------------------------------------------------------------------------------------------------------------------------------------------------------------------------------------------------------------------------------------------------------------------------------------------------------------------------------------------------------------------------------------------------------------------------------------------------------------------------------------------------------------------------------------------------------------------------------------------------------------------------------------------------------------------------------------------|--------------------------------------------------------------------------------------------------------------------------------------------------------------------------------------------------------------------------------------------------------------------------------------------------------------------------------------------------------------------------------------------------------------------------------------------------------------------------------------------------------------------------------------------------------------------------------------------------------------------------------------------------------------------------------------------------------------------------------------------------------------------------------------------------------------------------------------------------------------------------------------------------------------------------------------------------------------------------------------------|
| <p><b>Hybrid (community-health facility)<sup>d</sup></b></p> | <p>Koss et al. (2020)<sup>40</sup></p> <p>Kenya and Uganda</p> | <p>Manuscript</p> <p>To assess PrEP uptake and engagement after population-level HIV testing and universal PrEP access to characterise gaps in the PrEP cascade</p> | <p><b>Study population:</b> Offered to use PrEP services</p> <p><b>Sample</b></p> <p><b>Sample size (total – N):</b> 12935 (HIV-negative with elevated risk)</p> <p><b>Gender distribution:</b> Female: 6459; Male: 6476</p> <p><b>Age distribution:</b> 15-24: 4800; 25-34: 4712; 35-44: 1927; 45-54: 991; ≥55: 505</p> | <p><b>Nature of Intervention:</b> Population-level HIV and multi-disease testing using a hybrid mobile testing approach at community health fairs, home-based testing or facilities. PrEP initiation at health fairs or at local clinic.</p> <p><b>Intervention components:</b></p> <p><b>Community:</b> community sensitisation, HIV testing, PrEP counselling to HIV- negative people at elevated risk (serodifferent partnership, risk score, or self-identified risk); on-site PrEP start at health fairs or same-day PrEP initiation at local clinics. <b>Home:</b> home-based testing and PrEP counselling, offer of PrEP through local clinics.</p> <p><b>Local clinic:</b> Patients with HIV were asked to bring their HIV-negative or partners with unknown HIV status to the clinic for HIV testing and the offer of PrEP initiation.</p> <p><b>Follow up:</b> visits included supportive delivery system with options for visits at clinic, home, or community locations. Follow up visits included: HCT, PrEP refill blood tests and adherence measurements</p> | <ul style="list-style-type: none"> <li>• In 12935 (10% serodifferent partnership, 54% risk score, 36% self-identified risk) people at elevated risk, 27% initiated PrEP.</li> <li>• 82% initiated PrEP on the same day as HIV testing, 50% of whom were men</li> <li>• 19% of AGYW (15-24 years) initiated PrEP</li> <li>• PrEP uptake was lower among individuals aged 15-24 years and mobile individuals.</li> <li>• At week 4, 64% were engaged in the programme, 49% received medication refills, and 40% self-reported adherence.</li> <li>• At week 72, 56% were engaged, 33% received a refill, and 27% self-reported adherence.</li> <li>• Inclusive risk assessment (combining serodifferent partnership, an empirical risk score, and self-identification of HIV risk) was feasible and identified individuals who could benefit from PrEP.</li> <li>• The biggest gap in the PrEP cascade was PrEP uptake, particularly for young and mobile individuals.</li> <li>•</li> </ul> |
| <p><b>Hybrid (community-health facility)<sup>d</sup></b></p> | <p>Mayer et al. (2019)<sup>41</sup></p> <p>Uganda</p>          | <p>Manuscript</p> <p>To estimate the association between distance to clinic and other transportation-related barriers on PrEP uptake and initial clinic visit</p>   | <p><b>Study population:</b> Offered to use PrEP services</p> <p><b>Sample</b></p> <p><b>Sample size (total – N):</b> 701</p> <p><b>Gender distribution:</b> Female: 300; Male: 401</p> <p><b>Age distribution:</b> 15-24: 339; 25-34: 242;</p>                                                                           | <p><b>Nature of Intervention:</b> PrEP was given using a hybrid model and initiation was dependent on participant choice. PrEP could be initiated same day on-site at community health fairs or at local clinic). For those tested at home PrEP was offered within one to six months following the community campaign through local clinics.</p>                                                                                                                                                                                                                                                                                                                                                                                                                                                                                                                                                                                                                                                                                                                            | <ul style="list-style-type: none"> <li>• Of the 701 PrEP-eligible participants, 39% started PrEP within four weeks; of these, 17% were retained at four weeks.</li> <li>• Participants with a distance to clinic of ≥2 km were less likely to start PrEP (p = 0.012) and less likely to be retained on PrEP once initiated (p = 0.024)</li> <li>• Eligible participants (from home-based testing) who did not have the option of same-day PrEP initiation were also less likely to initiate PrEP (p &lt; 0.001).</li> </ul>                                                                                                                                                                                                                                                                                                                                                                                                                                                                |

|                                                       |                                                            |                                                                                                                                                                                                                               |                                                                                                                                                                                                                                                 |                                                                                                                                                                                                                                                                                                                                                                                                                                                                                                                                                                                                           |                                                                                                                                                                                                                                                                                                                                                                                                                                                                                                                                                                                                                                                                                                                                                                                                                                                                                                                                                                                                                                                             |
|-------------------------------------------------------|------------------------------------------------------------|-------------------------------------------------------------------------------------------------------------------------------------------------------------------------------------------------------------------------------|-------------------------------------------------------------------------------------------------------------------------------------------------------------------------------------------------------------------------------------------------|-----------------------------------------------------------------------------------------------------------------------------------------------------------------------------------------------------------------------------------------------------------------------------------------------------------------------------------------------------------------------------------------------------------------------------------------------------------------------------------------------------------------------------------------------------------------------------------------------------------|-------------------------------------------------------------------------------------------------------------------------------------------------------------------------------------------------------------------------------------------------------------------------------------------------------------------------------------------------------------------------------------------------------------------------------------------------------------------------------------------------------------------------------------------------------------------------------------------------------------------------------------------------------------------------------------------------------------------------------------------------------------------------------------------------------------------------------------------------------------------------------------------------------------------------------------------------------------------------------------------------------------------------------------------------------------|
|                                                       |                                                            |                                                                                                                                                                                                                               | 35-44:77;<br>45-54: 991;<br>≥45: 43                                                                                                                                                                                                             | <b>Intervention components:</b><br>Meetings with community stakeholders to sensitise them on PrEP, at community health campaigns (CHCs), eligible HIV-negative participants at elevated risk (serodifferent partnership, risk score, or self-identified risk) were directed to a PrEP education station where they were informed about how PrEP works, interested participants were offered referral to a linkage station to make an appointment at clinic for PrEP enrolment or same-day PrEP start or a clinic appointment at a later date.                                                             | <ul style="list-style-type: none"> <li>Barriers to PrEP use: daily use of PrEP, "low/no risk of getting HIV, transportation-related barriers (clinic is too far away and travel away from home).</li> </ul>                                                                                                                                                                                                                                                                                                                                                                                                                                                                                                                                                                                                                                                                                                                                                                                                                                                 |
| <b>Hybrid (community-health facility)<sup>d</sup></b> | Camlin et al. (2020) <sup>42</sup><br><br>Kenya and Uganda | Manuscript<br><br>To explore understandings of PrEP, elucidate factors influential of demand, decisions around PrEP uptake or non-initiation, and adherence and discontinuation in population subgroups at elevated HIV risk. | <b>Study population:</b><br>Offered to use PrEP services<br><b>Sample</b><br><b>Sample size (total – N):</b> 111<br><b>Gender distribution:</b><br>Females: 65;<br>Males: 46<br><b>Age distribution:</b><br>15-35, median age: 24 (range 17-35) | <b>Nature of Intervention:</b><br>Same day PrEP initiation on-site at community health campaigns or at health facilities. 8 FGDs (4 male, 4 female groups) each with 8-12 participants; 13 IDIs with PrEP initiators and 10 IDIs with PrEP decliners<br><b>Intervention components:</b> As per SEARCH study: Same day initiation of PrEP on-site at community health campaigns or health facilities. Transport to clinics for the PrEP initiation visit. Follow-up visits which occurred at local health facilities, participants' homes, or other community-based locations of the participant's choice. | <ul style="list-style-type: none"> <li>Gendered motivations for PrEP: young men viewed PrEP as a means to safely pursue multiple partners, while young women saw PrEP as a means to control risks in terms of engagement in transactional sex and difficulty in negotiating condom use and partner testing.</li> <li>Uptake was hindered by HIV/ART-related stigma (colour of pill same as ART, accessing PrEP at the same facility where HIV care was provided), the need for partners permission, distance to facilities, mixed messaging on the dosing of PrEP, taking daily medications, living with parents or were attending school, moral prohibitions against sex among young people, desire for "proof" of efficacy by peers</li> <li>Uptake was motivated by high perceived HIV risk, and beliefs that PrEP use supported life goals (completing schooling or having a family).</li> <li>Discontinuation of PrEP was due to dissolution of partnerships/changing risk, unsupportive partners/peers, or early side effects/pill burden.</li> </ul> |
| <b>Hybrid (community)</b>                             | Koss et al. (2017) <sup>43</sup>                           | Conference abstract                                                                                                                                                                                                           | <b>Study population:</b><br>Offered to use PrEP services (nested in SEARCH Trial)                                                                                                                                                               | <b>Nature of Intervention:</b><br>This is a cross sectional study based on SEARCH trial                                                                                                                                                                                                                                                                                                                                                                                                                                                                                                                   | <ul style="list-style-type: none"> <li>In communities that were offered targeted PrEP in this population-based study, multi-level barriers to the uptake of PrEP were identified.</li> </ul>                                                                                                                                                                                                                                                                                                                                                                                                                                                                                                                                                                                                                                                                                                                                                                                                                                                                |

|                                           |                                                   |                                                                                                                              |                                                                                                                                                                                                                                                                                                                                                                               |                                                                                                                                                                                                                                                                                                                                                      |                                                                                                                                                                                                                                                                                                                                                                                                                                                                                                                                                                                                                                                                                                                                                                                                                                                                |
|-------------------------------------------|---------------------------------------------------|------------------------------------------------------------------------------------------------------------------------------|-------------------------------------------------------------------------------------------------------------------------------------------------------------------------------------------------------------------------------------------------------------------------------------------------------------------------------------------------------------------------------|------------------------------------------------------------------------------------------------------------------------------------------------------------------------------------------------------------------------------------------------------------------------------------------------------------------------------------------------------|----------------------------------------------------------------------------------------------------------------------------------------------------------------------------------------------------------------------------------------------------------------------------------------------------------------------------------------------------------------------------------------------------------------------------------------------------------------------------------------------------------------------------------------------------------------------------------------------------------------------------------------------------------------------------------------------------------------------------------------------------------------------------------------------------------------------------------------------------------------|
| <b>y-health facility</b> <sup>d</sup>     | Kenya and Uganda                                  | To evaluate barriers to the uptake of open-label PrEP offered in a population-based context in high HIV prevalence settings. | <b>Sample Population:</b><br>Men. Women and youth<br><b>Sample size (total – N):</b><br>63 Community members:<br>40% men; 35% women;<br>25% youth<br>42 Clients who did not initiate PrEP: 38% women; 45% at risk for HIV by empiric score<br><b>Gender distribution:</b><br>16-53 years, median age of 28 years<br><b>Age distribution:</b><br>40% men, 35% women, 25% youth | <b>Intervention components:</b><br>n/a<br><b>Intervention delivery setting:</b><br>n/a                                                                                                                                                                                                                                                               | <ul style="list-style-type: none"> <li>- In addition to barriers identified in prior studies of targeted populations, such as aspects of pill-taking, concerns about effectiveness, and partner and household--level influence, concerns about access to PrEP via health facilities or at school, opportunity costs, mobility, and misconceptions about PrEP as barriers to uptake in SEARCH communities.</li> <li>• Strategies are needed to address these barriers, such as community sensitization, expanded provision of information on PrEP, and community--based delivery mechanisms to facilitate access to PrEP.</li> </ul>                                                                                                                                                                                                                            |
| <b>Hybrid (community-health facility)</b> | Gombe et al. (2020) <sup>44</sup><br><br>Zimbabwe | Manuscript<br><br>To understand the factors that motivate clients to accept, decline, continue, or discontinue PrEP.         | <b>Study population:</b><br>Offered to use PrEP services<br><b>Sample</b><br><b>Sample size (total – N):</b> 60<br><b>Gender distribution:</b><br>Female: 46; Male: 14<br><b>Age distribution:</b> 16-25: 20%; 26-40: 60%; >41: 20%                                                                                                                                           | <b>Nature of Intervention:</b> PrEP was integrated at two family planning clinics. 54 IDIs with PrEP acceptors and 6 IDIs with PrEP decliners<br><b>Intervention components:</b><br>HIV testing; screening for PrEP eligibility according to a tool; same day initiation of PrEP (one-month supply); follow-up visit at month 1 (three-month supply) | <ul style="list-style-type: none"> <li>• Motivators to accept PrEP: High HIV risk perception, preference for PrEP over other HIV prevention methods, perceived severity of living with HIV, confidence in PrEP</li> <li>• Barriers to accepting PrEP: fear of pill burden or impact of pills, wanting partners consent or fearing partner reaction to PrEP, feeling satisfied with current method of HIV prevention</li> <li>• Motivators to continue PrEP: focus on original motivation, establishing daily pill routine, accessible PrEP pill storage, planning ahead before travelling out of town, partner or facility support</li> <li>- Barriers to continuing PrEP: being unaccustomed to taking pills, religious issues, travel out of town, clinic schedule/hours, lack of transport funds, misunderstanding dosing guidance, side effects</li> </ul> |
| <b>Health facility</b>                    | Sack et al (2020) <sup>51</sup><br><br>Mozambique | Manuscript<br><br>To explore the perspectives, attitudes, and experiences of HIV serodiscordant partners taking              | <b>Study population:</b><br>Offered to use PrEP services<br><b>Sample</b><br><b>Sample size (total – N):</b> 20<br><b>Gender distribution:</b><br>Female: 11; Male: 9<br><b>Age distribution:</b> Median age 35, interquartile range                                                                                                                                          | <b>Nature of Intervention:</b> Stories will be presented to discordant couples to try to improve PrEP uptake and reduce incident HIV infections.<br><b>Intervention components:</b><br>Three oral stories designed to educate, empower, and normalize PrEP use.                                                                                      | <ul style="list-style-type: none"> <li>• Individual factors influencing PrEP uptake and adherence: love for one's partner, knowledge about PrEP and the belief it is effective, fear of HIV and PrEP stigma</li> <li>• Interpersonal factors affecting PrEP uptake: desire to protect family, partner support and relationship</li> </ul>                                                                                                                                                                                                                                                                                                                                                                                                                                                                                                                      |



|                  |                                                         |                                                                                                                                            |                                                                                                                                                                                                                                                                                                                                                                                                                                                                                                                                                               |                                                                                                                                 |                                                                                                                                                                                                                                                                                                                                                                                                                                                                                                                                                                |
|------------------|---------------------------------------------------------|--------------------------------------------------------------------------------------------------------------------------------------------|---------------------------------------------------------------------------------------------------------------------------------------------------------------------------------------------------------------------------------------------------------------------------------------------------------------------------------------------------------------------------------------------------------------------------------------------------------------------------------------------------------------------------------------------------------------|---------------------------------------------------------------------------------------------------------------------------------|----------------------------------------------------------------------------------------------------------------------------------------------------------------------------------------------------------------------------------------------------------------------------------------------------------------------------------------------------------------------------------------------------------------------------------------------------------------------------------------------------------------------------------------------------------------|
|                  |                                                         | PrEP and develop a messaging campaign to improve PrEP uptake in rural Mozambique to reduce HIV transmission among serodiscordant partners. | 26.5-37.5). Female: median age 32, interquartile range 25.5-36; male: median age 36, interquartile range 31-38.                                                                                                                                                                                                                                                                                                                                                                                                                                               |                                                                                                                                 | strength, Overcoming the fear of stigma to seek support from family and friends                                                                                                                                                                                                                                                                                                                                                                                                                                                                                |
| <b>Community</b> | Bassett et al. (2018) <sup>45</sup><br><br>South Africa | Manuscript<br><br>To assess the acceptability and feasibility of offering family planning and HIV prevention services at salons.           | <b>Study population:</b><br>Never been offered to use PrEP services (hypothetical opinions related to PrEP)<br><b>Sample Population:</b><br>17 hair salons, 92 stylists, 326 clients<br><b>Sample size (total – N):</b><br>Salons (N = 17), Owners (N = 17), Stylists (N = 92), Female clients (N = 326)<br><b>Gender distribution:</b><br>100% of salon clients were female 82% of stylists were female 65% of owners were female<br><b>Age distribution:</b><br>Median age (IQR): Salon clients: 28 (IQR 24 to 33); Stylists: 29 (26-32) Owners: 36 (33-43) | <b>Nature of Intervention:</b><br>n/a<br><b>Intervention components:</b><br>n/a<br><b>Intervention delivery setting:</b><br>n/a | <ul style="list-style-type: none"> <li>Overall, most owners, stylists, and clients were willing to receive contraception and PrEP from a nurse in hair salons in and around Umlazi Township.</li> <li>Frequent client visits and willingness of stylists to offer health education suggest that a stylist initiated, nurse-supported health intervention could be feasible in the salon setting.</li> <li>Hair salons represent a promising venue for reaching young women in sub-Saharan Africa at risk of unintended pregnancy and HIV infection.</li> </ul> |
| <b>Community</b> | Bassett et al. (2019) <sup>46</sup><br><br>South Africa | Manuscript<br><br>To assess the acceptability of nurse-offered contraceptive and PrEP services at                                          | <b>Study population:</b><br>Never been offered to use PrEP services (hypothetical opinions related to PrEP)<br><b>Sample Population:</b>                                                                                                                                                                                                                                                                                                                                                                                                                      | <b>Nature of Intervention:</b><br>n/a<br><b>Intervention components:</b><br>n/a<br><b>Intervention delivery setting:</b><br>n/a | <ul style="list-style-type: none"> <li>Participants felt that incentives would be beneficial to program enrolment, if not necessary, to garner interest among clients. One client noted that incentives have become an expected part of research</li> <li>Overall, participants liked the idea of receiving personal SMS messages and having WhatsApp</li> </ul>                                                                                                                                                                                               |

|                  |                                                   |                                                                                                                                                |                                                                                                                                                                                                                                                                                                                                                                                                                                                                                                                                                                                              |                                                                                                          |                                                                                                                                                                                                                                                                                                                                                                                                                                                                                                                                                                                                                                                                                                                                                                                                                                                                                                                                                                                 |
|------------------|---------------------------------------------------|------------------------------------------------------------------------------------------------------------------------------------------------|----------------------------------------------------------------------------------------------------------------------------------------------------------------------------------------------------------------------------------------------------------------------------------------------------------------------------------------------------------------------------------------------------------------------------------------------------------------------------------------------------------------------------------------------------------------------------------------------|----------------------------------------------------------------------------------------------------------|---------------------------------------------------------------------------------------------------------------------------------------------------------------------------------------------------------------------------------------------------------------------------------------------------------------------------------------------------------------------------------------------------------------------------------------------------------------------------------------------------------------------------------------------------------------------------------------------------------------------------------------------------------------------------------------------------------------------------------------------------------------------------------------------------------------------------------------------------------------------------------------------------------------------------------------------------------------------------------|
|                  |                                                   | hair salons in Durban, South Africa.                                                                                                           | <p>Clients of hair salons- Females, mean age 27 years, hair salon owners, hair stylists</p> <p><b>Sample size (total – N):</b><br/>Clients=42 (all female)<br/>Stylists=43 (40 female; 3 male) Salon owners=10 (8 female; 2 male)</p> <p><b>Gender distribution:</b><br/>Clients: 42 Females Stylists: 40 Females; 3 Males<br/>Owners: 8 Females; 2 Males</p> <p><b>Age distribution:</b><br/>Clients: M=27.1; SD=6.3<br/>Stylists: M=29.6; SD=5.1<br/>Owners: M=40.3; SD; 7.6</p>                                                                                                           |                                                                                                          | <p>groups as adherence supports. Clients preferred SMS messages for direct adherence motivation because they are more private.</p> <ul style="list-style-type: none"> <li>• One client felt that an SMS could also serve as an automated daily reminder for women on PrEP to take their medication. A few participants also noted that SMS would be more accessible than WhatsApp given data constraints.</li> <li>• Overall, participants were enthusiastic about the program. Convenience and a conducive environment were noted as facilitators to receiving health services in the hair salon; attention will have to be directed to establishing privacy and program legitimacy.</li> <li>• Hair salons represent an innovative venue for reaching young women at high-risk for unintended pregnancy and HIV infection.</li> </ul>                                                                                                                                         |
| <b>Community</b> | Lubwama et al. (2019) <sup>47</sup><br><br>Uganda | <p>Conference abstract</p> <p>A review of PrEP data from PEPFAR Data for Transparency Impact Monitoring (DATIM) for July 2017 to June 2018</p> | <p><b>Study population:</b><br/>Offered to use PrEP services</p> <p><b>Sample Population:</b> Key populations including sex workers (SW), men who have sex with men (MSM), transgender persons (TG) and other high-risk groups (fisher folk [FF], discordant couples [DC], truckers, adolescent girls and young women [AGYW] and people who inject drugs).</p> <p><b>Sample size (total – N):</b><br/>Initiated PrEP (6 sites)<br/>3,846<br/>PrEP clients (1 community):<br/>1538</p> <p><b>Gender distribution:</b><br/>Not mentioned</p> <p><b>Age distribution:</b><br/>Not mentioned</p> | <p><b>Intervention components:</b><br/>Drop-in centres (DINCs),<br/>Community based outreach centres</p> | <ul style="list-style-type: none"> <li>• 3,846 individuals-initiated PrEP; 2,568 (67.2%) SW, 327 (8.5%) MSM, 15 (0.4%) TG, and 918 (23.8%) other high-risk groups</li> <li>• One community had 1538 PrEP clients: 58.1% SW, 25.4% FF, 7.4% DC and 0.5% MSM.</li> <li>• Return rates for PrEP were higher among DC (3 months:56.9%, 6 months:46.8%) and low among SW (3 months 37.5%, 6 months 26.3%) and FF (3months 16.4%, 6months 14.2%).</li> <li>• The majority (69.2%, 1064/1538) were reached through outreach models versus fixed public health facilities</li> <li>• More SW than other KP and high-risk groups were reached with PrEP. Retention at 3 and 6 months was low for sex workers and fisherfolk, somewhat higher for discordant couples.</li> <li>• Outreach approaches should be scaled up to reach more KP clients with PrEP. Retention strategies should be strengthened, especially for sex workers and fisherfolk, who may be highly mobile.</li> </ul> |

|                             |                                                              |                                                                                                                                                                                                                              |                                                                                                                                                                                                                                                                                                                                                                                                                                                                                                                                                                                                                                                           |                                                                                                                                                                                                                                                                                                                                                                                                                                                                                                                                                                                                                                   |                                                                                                                                                                                                                                                                                                                                                                                                                                                                                                                                                                                                                                            |
|-----------------------------|--------------------------------------------------------------|------------------------------------------------------------------------------------------------------------------------------------------------------------------------------------------------------------------------------|-----------------------------------------------------------------------------------------------------------------------------------------------------------------------------------------------------------------------------------------------------------------------------------------------------------------------------------------------------------------------------------------------------------------------------------------------------------------------------------------------------------------------------------------------------------------------------------------------------------------------------------------------------------|-----------------------------------------------------------------------------------------------------------------------------------------------------------------------------------------------------------------------------------------------------------------------------------------------------------------------------------------------------------------------------------------------------------------------------------------------------------------------------------------------------------------------------------------------------------------------------------------------------------------------------------|--------------------------------------------------------------------------------------------------------------------------------------------------------------------------------------------------------------------------------------------------------------------------------------------------------------------------------------------------------------------------------------------------------------------------------------------------------------------------------------------------------------------------------------------------------------------------------------------------------------------------------------------|
| <p><b>Community</b></p>     | <p>Morton et al (2020)<sup>48</sup></p> <p>South Africa</p>  | <p>Manuscript</p> <p>To understand how to effectively create awareness, stimulate interest, and increase uptake of PrEP.</p>                                                                                                 | <p><b>Study population:</b><br/>Never been offered to use PrEP services (hypothetical opinions related to PrEP)</p> <p><b>Sample</b><br/><b>Sample size (total – N):</b> 385<br/>Quantitative: 320<br/>Qualitative: 28 key stakeholders; 11 PrEP-naïve young, 10 PrEP-experienced women, five older women living with HIV, four men, seven key informants</p> <p><b>Gender distribution:</b><br/>Female 100% in household surveys</p> <p><b>Age distribution:</b><br/>Quantitative: 20 (18, 23)<br/>Qualitative: PrEP-naïve young women (aged 16-25), PrEP-experienced women (aged 16-29), older women living with HIV (aged 26-32), men (aged 25-35)</p> | <p><b>Nature of Intervention:</b><br/>Young women were shown a 90-second PrEP demand creation video and two informational brochures and then asked to self-administer a short survey that included questions on demographics, sexual relationships, risk taking, HIV risk perception, PrEP interest and knowledge, and their opinions about the video..</p> <p><b>Intervention components:</b><br/>Research staff visited houses up to three times, requesting to speak with the young woman household resident. Young women who agreed to participate were shown the video and then asked to self-administer a short survey.</p> | <p><b>Quantitative</b></p> <ul style="list-style-type: none"> <li>• Most reported interest in learning more about PrEP (67.7% 'definitely interested' and 9.4% 'somewhat interested') and taking PrEP (56.4% 'definitely interested' and 12.5% 'somewhat interested').</li> <li>• Factors significantly associated with interest in taking PrEP were having a primary partner with whom they regularly have sex (80.0% vs. 65.2% without a primary partner; adjusted odds ratio (AOR)=3.1, 95% CI: 1.3, 7.0) and being in a sexual partnership for &lt;6 months (86.8% vs. 68.5% for &gt;12 months; AOR=3.0, 95% CI: 1.2, 7.3).</li> </ul> |
| <p><b>Research site</b></p> | <p>Heffron et al. (2018)<sup>49</sup></p> <p>East Africa</p> | <p>Manuscript</p> <p>To present estimates of effectiveness and patterns of PrEP use within a two-year demonstration project of PrEP for HIV- negative members of heterosexual HIV serodiscordant couples in East Africa.</p> | <p><b>Study population:</b><br/>Offered to use PrEP services</p> <p><b>Sample</b><br/><b>Population:</b><br/>Serodiscordant couples<br/><b>Sample size (total – N):</b> 1010 couples<br/><b>Gender distribution:</b><br/>Males: 1010<br/>Females 1010<br/><b>Age distribution:</b><br/>HIV-: Age, years 30 (26, 36)<br/>HIV+: Age, years 28 (23, 35)</p>                                                                                                                                                                                                                                                                                                  | <p><b>Nature of Intervention:</b><br/>PrEP was offered at enrolment at research site to all HIV-negative participants as PrEP with a daily dosing schedule; participants electing not to initiate PrEP at enrolment were offered PrEP initiation at subsequent visits</p> <p><b>Intervention components:</b> N/A</p> <p><b>Intervention delivery setting:</b><br/>Research site</p>                                                                                                                                                                                                                                               | <ul style="list-style-type: none"> <li>• 97% of HIV-negative partners-initiated PrEP.</li> <li>• Median duration of PrEP use was 12 months (IQR 6-18)</li> <li>• Adherence: 71% of HIV-negative participants took ≥80% of expected doses</li> <li>• 95% reduction (95% CI 86-98%, p&lt;0.0001) in HIV incidence, relative to estimated HIV incidence for the population in the absence of PrEP integrated into HIV treatment services.</li> </ul>                                                                                                                                                                                          |

|                                                                                            |                                                                                                                                                                                     |                                                                                                                                                                                                                                                                                                           |                                                                                                                                                                                                                                                                                                                                                                     |                                                                                                                                                                                                                                                                                                                                                                                                                                                                                                                                                                                                                                                                                                                                                                                                                                       |
|--------------------------------------------------------------------------------------------|-------------------------------------------------------------------------------------------------------------------------------------------------------------------------------------|-----------------------------------------------------------------------------------------------------------------------------------------------------------------------------------------------------------------------------------------------------------------------------------------------------------|---------------------------------------------------------------------------------------------------------------------------------------------------------------------------------------------------------------------------------------------------------------------------------------------------------------------------------------------------------------------|---------------------------------------------------------------------------------------------------------------------------------------------------------------------------------------------------------------------------------------------------------------------------------------------------------------------------------------------------------------------------------------------------------------------------------------------------------------------------------------------------------------------------------------------------------------------------------------------------------------------------------------------------------------------------------------------------------------------------------------------------------------------------------------------------------------------------------------|
| <b>Research site<sup>e</sup></b><br>Ware et al. (2018) <sup>50</sup><br>Uganda             | Manuscript<br>To evaluate the integrated strategy of delivering PrEP & ART to find out why it was successful.                                                                       | <b>Study population:</b><br>Offered to use PrEP services<br><b>Sample</b><br><i>Sample size (total – N):</i> 93 couples<br><b>Gender distribution:</b><br>Female HIV-uninfected partner: (46%)<br><b>Age distribution:</b><br>HIV uninfected partner: 31 (26 to 37)<br>HIV infected partner 31 (25 to 37) | <b>Nature of Intervention:</b> The integrated strategy offered time-limited PrEP to uninfected partners as a "bridge" to long-term ART in the infected partner. Uninfected partners were offered PrEP at baseline and encouraged to discontinue once infected partners had used ART for six months.<br><b>Intervention components:</b> PrEP was integrated with ART | <ul style="list-style-type: none"> <li>• Couples viewed in services as hope for staying together, attending joint follow up appointments together increased mutual support, and travelling and waiting room time provided an opportunity for discussion, reflection and joint decision making.</li> <li>• Concern for partner wellbeing was a reason for initiating ART whilst the simultaneous use of ARVs turned management of HIV into a shared experience</li> <li>• Couples devised joint strategies for adhering to PrEP and ART such as mutual reminders and emotional and material support for adherence.</li> </ul>                                                                                                                                                                                                          |
| <b>Research site</b><br>Atujuna et al. (2018) <sup>51</sup><br>South Africa                | Manuscript<br>To explore acceptability and preferences for New biomedical prevention technologies (NPTs) among key and other vulnerable populations in two South African townships. | <b>Study population:</b><br>Never been offered to use PrEP services (hypothetical opinions related to PrEP)<br><b>Sample</b><br><i>Sample size (total – N)</i><br>Adolescents=14<br><b>Gender distribution:</b><br>Heterosexual women=10<br>Heterosexual men=9                                            | <b>Nature of Intervention:</b><br>n/a<br><b>Intervention components:</b><br>n/a<br><b>Intervention delivery setting:</b><br>n/a                                                                                                                                                                                                                                     | <ul style="list-style-type: none"> <li>• Different product preferences and motivations emerged by population based on similarity to existing practices and contexts of vulnerability.</li> <li>• Adult women and female adolescents preferred a vaginal ring and HIV vaccine, motivated by longer duration of protection to mitigate feared repercussions from male partners, including threats to their marriage and safety, and a context of ubiquitous rape.</li> <li>• Male adolescents preferred an HIV vaccine, seen as protection in serodiscordant relationships and convenient in obviating the HIV stigma and cost involved in buying condoms.</li> <li>• Adult men preferred PrEP, given familiarity with oral medications and mistrust of injections, seen as enabling serodiscordant couples to have a child.</li> </ul> |
| <b>Research site<sup>e</sup></b><br>Baeten et al. (2016) <sup>52</sup><br>Kenya and Uganda | Manuscript<br>To understand the delivery feasibility and uptake of, as well as adherence to, an integrated package of ART and PrEP among high-risk heterosexual HIV-                | <b>Study population:</b><br>Offered to use PrEP services<br><b>Sample</b><br><i>Sample size (total – N)</i><br>1013 serodiscordant couples<br><b>Gender distribution:</b><br>HIV-1-uninfected partner Male: 679 (67%)<br><b>Age distribution:</b><br>HIV-1-uninfected partner Age <25 y=207 (20%),        | <b>Nature of Intervention:</b><br>HIV- partners were offered PrEP which was provided at the study sites, as PrEP was not available otherwise in Kenya and Uganda during the study period. ART was offered at the study site or by referral to another HIV-1 care center of their choice<br><b>Intervention components:</b>                                          | <ul style="list-style-type: none"> <li>• ART was initiated by 789 (78%) HIV-1-infected partners.</li> <li>• 960/1 013 (95%) HIV-uninfected partners-initiated PrEP at enrolment, and 2% initiated PrEP at a later visit.</li> <li>• Among those initiating PrEP at enrolment and attending the month 1 and 3 visits, 840 (97%) and 792 (94%) continued to receive PrEP.</li> <li>• Adherence to PrEP measured by pill counts of returned, unused pills, indicated that 95% of</li> </ul>                                                                                                                                                                                                                                                                                                                                              |

|                      |                                                       |                                                                                                                                                                                  |                                                                                                                                                                                                                                         |                                                                                                                                                                                                                                                                                                                                                                                                                                                                                                                                                                                                                                                                                                                                                                                                                                   |                                                                                                                                                                                                                                                                                                                                                                                                                                                                                                                                                                                                                                                                                                                                                                                                                                                                                                                                   |
|----------------------|-------------------------------------------------------|----------------------------------------------------------------------------------------------------------------------------------------------------------------------------------|-----------------------------------------------------------------------------------------------------------------------------------------------------------------------------------------------------------------------------------------|-----------------------------------------------------------------------------------------------------------------------------------------------------------------------------------------------------------------------------------------------------------------------------------------------------------------------------------------------------------------------------------------------------------------------------------------------------------------------------------------------------------------------------------------------------------------------------------------------------------------------------------------------------------------------------------------------------------------------------------------------------------------------------------------------------------------------------------|-----------------------------------------------------------------------------------------------------------------------------------------------------------------------------------------------------------------------------------------------------------------------------------------------------------------------------------------------------------------------------------------------------------------------------------------------------------------------------------------------------------------------------------------------------------------------------------------------------------------------------------------------------------------------------------------------------------------------------------------------------------------------------------------------------------------------------------------------------------------------------------------------------------------------------------|
|                      |                                                       | 1-serodiscordant couples                                                                                                                                                         | HIV-1-infected partner Age <25 y= 317 (31%)                                                                                                                                                                                             | <ul style="list-style-type: none"> <li>- Couples were offered antiretroviral medications</li> <li>- Counselling on HIV-1 prevention benefits</li> </ul> PrEP discontinued 6 months after the infected partner initiated antiretroviral treatment                                                                                                                                                                                                                                                                                                                                                                                                                                                                                                                                                                                  | dispensed pills had been taken as expected and 88% of periods between study visits had adherence >80%. <ul style="list-style-type: none"> <li>• 14 initially HIV-1-seronegative partners seroconverted during follow-up (12 were infected at the time of study enrolment).</li> </ul>                                                                                                                                                                                                                                                                                                                                                                                                                                                                                                                                                                                                                                             |
| <b>Research site</b> | Heffron et al. (2019) <sup>53</sup><br><br>Kenya      | Manuscript<br><br>To determine uptake, use and effectiveness of a comprehensive safer conception intervention among HIV-serodiscordant couples with immediate fertility desires. | <b>Study population:</b><br>Offered to use PrEP services<br><b>Sample Population:</b><br>Serodiscordant couples<br><b>Sample size (total – N):</b><br>74<br><b>Gender distribution:</b><br>HIV-negative females/HIV positive males= 54% | <b>Nature of Intervention:</b><br>Couples attended monthly visits at the study clinic prior to pregnancy and quarterly visits during pregnancy. Couples were followed for 12 months or until the end of pregnancy. During all visits, couples received counselling about HIV prevention, information about how to track women's menstrual cycles and identify peak fertility days and how to conduct vaginal self-insemination<br><b>Intervention components:</b><br>The intervention package included antiretroviral therapy (ART) for HIV-positive partners, oral pre-exposure prophylaxis (PrEP) for HIV-negative partners, daily fertility and sexual behaviour tracking via short message service (SMS) surveys, counselling on self-insemination, and referrals for voluntary medical male circumcision and fertility care. | <ul style="list-style-type: none"> <li>• Of the 74 enrolled couples, 54% were HIV-negative female/HIV-positive male couples.</li> <li>• Prior to pregnancy, 100% of partners living with HIV used ART and 100% of HIV-negative partners-initiated PrEP.</li> <li>• One-month preceding pregnancy, 80.9% of HIV-positive partners were virally suppressed and 81.4% of HIV-negative partners were highly adherent to PrEP.</li> <li>• 42.6% pregnancies were protected using all four strategies i.e., men were circumcised, high adherence to PrEP, ART and timed condomless sex.</li> <li>• In addition to male circumcision, seven pregnancies (14.9%) were also protected by high adherence to PrEP and ART, 5 (10.6%) were protected by PrEP and timed condomless sex.</li> <li>• 0 HIV seroconversions (95% CI 0.0 to 6.0 per 100-person years) were observed indicating a 100% reduction in HIV risk (p = 0.04).</li> </ul> |
| <b>Research Site</b> | Minnis et al (2020) <sup>54</sup><br><br>South Africa | Manuscript<br><br>Examined youths' preferences for key attributes of long-acting PrEP, with a focus on characteristics pertinent to product                                      | <b>Study population:</b><br>Never been offered to use PrEP services (hypothetical opinions related to PrEP)<br><b>Sample</b><br><b>Sample size (total – N):</b> 807<br><b>Gender distribution:</b><br>Female: 401 (50%);                | <b>Nature of Intervention:</b><br>Participants were asked to choose between two hypothetical PrEP products composed of five attributes product form (injection, implant); dosing frequency (two, six or twelve months); where to obtain the product (clinic, pharmacy, community distribution, mobile clinic - all                                                                                                                                                                                                                                                                                                                                                                                                                                                                                                                | <ul style="list-style-type: none"> <li>• All three subgroups had strong preference for a product with a one-year duration over two months (p &lt; 0.001).</li> <li>• MSW placed the most importance on dosing frequency, with it being five times more important than any other attribute.</li> <li>• Females had greater preference for a single injection over an implant compared to MSW (p ≤ 0.004).</li> </ul>                                                                                                                                                                                                                                                                                                                                                                                                                                                                                                               |

|                      |                                                  |                                                                                                                                                                                        |                                                                                                                                                                                                                                                                           |                                                                                                                                                                                                                                                                                                                                                                                                                                                                                                                                            |                                                                                                                                                                                                                                                                                                                                                                                                                                                                                                                                                                                                                                                                                                                                                                                                                                                                                                                                                                                                                        |
|----------------------|--------------------------------------------------|----------------------------------------------------------------------------------------------------------------------------------------------------------------------------------------|---------------------------------------------------------------------------------------------------------------------------------------------------------------------------------------------------------------------------------------------------------------------------|--------------------------------------------------------------------------------------------------------------------------------------------------------------------------------------------------------------------------------------------------------------------------------------------------------------------------------------------------------------------------------------------------------------------------------------------------------------------------------------------------------------------------------------------|------------------------------------------------------------------------------------------------------------------------------------------------------------------------------------------------------------------------------------------------------------------------------------------------------------------------------------------------------------------------------------------------------------------------------------------------------------------------------------------------------------------------------------------------------------------------------------------------------------------------------------------------------------------------------------------------------------------------------------------------------------------------------------------------------------------------------------------------------------------------------------------------------------------------------------------------------------------------------------------------------------------------|
|                      |                                                  | delivery alongside key modifiable product attributes.                                                                                                                                  | Men who have sex with women only (MSW): 216 (27%).<br>Men who have sex with men MSM): 190 (23%)<br><b>Age distribution:</b><br>Median age (IQR):<br>Female: 21 (19 to 22);<br>men who have sex with women only: 21 (19 to 22)<br>men who have sex with men: 20 (19 to 22) | models for current HIV prevention and contraceptive service delivery); pain involved with injection or insertion (mild, moderate) and delivery location on the body (arm, buttock, thigh).<br><b>Intervention components:</b><br>Participants completed interviews on a tablet computer. The survey first introduced each attribute individually with both visual and narrative descriptions. Participants were then presented with nine DCE choice questions, each one a unique choice<br><b>NB:</b> PrEP was not provided in this study. | <ul style="list-style-type: none"> <li>• Females and MSW expressed more preference for two injections compared with implants (<math>p \leq 0.009</math>).</li> <li>• Females preferred using a product that was offered at a health clinic over accessing it at a pharmacy (<math>p &lt; 0.001</math>).</li> <li>• All youth preferred product insertion in the arm (<math>p &lt; 0.001</math>).</li> <li>• Females disliked insertion in the thigh and both MSW and MSM disliked insertion on the buttocks (<math>p = 0.01</math>).</li> <li>• Youth indicated strong preferences for longer duration products.</li> </ul> <p>Each attribute nonetheless influenced preferences, offering insight into trade-offs that inform long-acting PrEP development.</p>                                                                                                                                                                                                                                                       |
| <b>Other</b>         |                                                  |                                                                                                                                                                                        |                                                                                                                                                                                                                                                                           |                                                                                                                                                                                                                                                                                                                                                                                                                                                                                                                                            |                                                                                                                                                                                                                                                                                                                                                                                                                                                                                                                                                                                                                                                                                                                                                                                                                                                                                                                                                                                                                        |
| <b>Not described</b> | Jani et al. (2018) <sup>55</sup><br><br>Tanzania | Conference abstract<br><br>To describe support for PrEP use among male partners of AGYW in Tanzania via a qualitative comparative analysis of AGYW's and male partners of AGYW's views | <b>Study population:</b><br>Never been offered to use PrEP services (hypothetical opinions related to PrEP)<br><b>Sample</b><br><b>Sample size (total – N):</b> not described<br><b>Gender distribution:</b> not described<br><b>Age distribution:</b> not described      | <b>Nature of Intervention:</b> Prior to IDIs and FGDs participants were acquainted with PrEP, by sharing a visual, standardized script of PrEP information with them. 24 IDIs and 4 FGDs with AGYW; 16 IDIs with men<br><b>Intervention components:</b> PrEP for AGYW                                                                                                                                                                                                                                                                      | <ul style="list-style-type: none"> <li>• AGYW and male partners agreed that most male partners would be willing to support PrEP use by AGYW.</li> <li>• However, male partner support might be contingent on their early involvement in the decision-making process regarding PrEP.</li> <li>• Early inclusion was perceived to remove suspicion of infidelity and alleviate negative consequences associated with late or inadvertent disclosure of PrEP use.</li> <li>• AGYW suggested potential social harms (relationship dissolution, loss of financial support, and verbal and physical violence) if male partners are not involved whilst male partners denied such potential extreme consequences.</li> <li>• Male participants recommended strategies on gaining men's support of PrEP including providing education to men on PrEP, equipping AGYW with skills to educate their partners, couples counselling by providers, provision of PrEP for men, and community education and sensitization.</li> </ul> |

|                 |                                                      |                                                                                                                                                                                           |                                                                                                                                                                                                                                                                                                                    |                                                                                                                                                                                                                                                                                   |                                                                                                                                                                                                                                                                                                                                                                                                                                                                                                                                                                                                                                                                                                                                                                                                                                                                                                                                     |
|-----------------|------------------------------------------------------|-------------------------------------------------------------------------------------------------------------------------------------------------------------------------------------------|--------------------------------------------------------------------------------------------------------------------------------------------------------------------------------------------------------------------------------------------------------------------------------------------------------------------|-----------------------------------------------------------------------------------------------------------------------------------------------------------------------------------------------------------------------------------------------------------------------------------|-------------------------------------------------------------------------------------------------------------------------------------------------------------------------------------------------------------------------------------------------------------------------------------------------------------------------------------------------------------------------------------------------------------------------------------------------------------------------------------------------------------------------------------------------------------------------------------------------------------------------------------------------------------------------------------------------------------------------------------------------------------------------------------------------------------------------------------------------------------------------------------------------------------------------------------|
|                 |                                                      |                                                                                                                                                                                           |                                                                                                                                                                                                                                                                                                                    |                                                                                                                                                                                                                                                                                   | <ul style="list-style-type: none"> <li>Educating male partners about PrEP and engaging them in implementation activities should be part of PrEP roll-out strategies for AGYW.</li> </ul>                                                                                                                                                                                                                                                                                                                                                                                                                                                                                                                                                                                                                                                                                                                                            |
| Not described   | Makyao et al. (2018) <sup>56</sup><br><br>Tanzania   | Conference abstract<br><br>To explore how social norms and gendered parenting roles might influence parental support of AGYW's PrEP use.                                                  | <b>Study population:</b><br>Never been offered to use PrEP services (hypothetical opinions related to PrEP)<br><b>Sample</b><br><b>Sample size (total – N):</b> 55<br><b>Gender distribution:</b><br>Female parents: 28; Male parents: 27<br><b>Age distribution:</b> not described                                | <b>Nature of Intervention:</b> Prior to IDIs and FGDs participants were acquainted with PrEP, by sharing a visual, standardized script of PrEP information with them. 4 FGDs with male parents and 4 FGDs with female parents<br><b>Intervention components:</b><br>PrEP for AGYW | <ul style="list-style-type: none"> <li>Parents supported PrEP availability recognizing AGYW's high risk of HIV due to limited power to negotiate preventative behaviours and frequent violence in sexual relationships.</li> <li>Differential parenting roles influenced the type of support. Men noted shame and embarrassment in communicating with their daughters about relationships and sex.</li> <li>Social norms around adolescent sexuality influenced parental support. Parents were wary of being viewed as condoning pre-marital sexual activity, while they worried that AGYW could be stigmatized as promiscuous.</li> <li>Parents recommended strategies for supporting their daughters PrEP use included: creating a supportive environment for PrEP use (e.g., ensuring good diet) while male parents described offering logistical and material support (e.g., providing transport to health centres).</li> </ul> |
| n/a (modelling) | Cremin et al. (2015) <sup>57</sup><br><br>Mozambique | Manuscript<br><br>The aim of this paper is to estimate the prevention impact and the cost effectiveness of providing time-limited PrEP to partners of migrant miners in Gaza, Mozambique. | <b>Study population:</b><br>Never been offered to use PrEP services (hypothetical opinions related to PrEP)<br><b>Sample</b><br><b>Population:</b><br>adult heterosexual<br><b>Sample size (total – N):</b><br>Note mentioned (modelling)<br><b>Gender distribution:</b><br>N/A<br><b>Age distribution:</b><br>N/A | <b>Nature of Intervention:</b><br>n/a<br><b>Intervention components:</b><br>n/a<br><b>Intervention delivery setting:</b><br>n/a                                                                                                                                                   | <ul style="list-style-type: none"> <li>Providing time-limited PrEP to partners of migrant miners in Gaza Province during periods of increased exposure would be a novel strategy for providing PrEP. This strategy would allow for a better prioritized intervention, with the potential to improve the efficiency of a PrEP intervention considerably, as well as providing important reproductive health benefits</li> </ul>                                                                                                                                                                                                                                                                                                                                                                                                                                                                                                      |
| n/a Modelling   | Irungu et al. (2019) <sup>58</sup><br>Kenya          | Manuscript<br><br>To provide estimates of the cost of delivering                                                                                                                          | <b>Study population:</b><br>Never been offered to use PrEP services (hypothetical opinions related to PrEP)<br><b>Sample</b>                                                                                                                                                                                       | <b>Nature of Intervention:</b><br>n/a<br><b>Intervention components:</b><br>n/a                                                                                                                                                                                                   | <ul style="list-style-type: none"> <li>Time-limited provision of PrEP to the HIV uninfected partner within HIV serodiscordant couples can be an affordable delivery model implemented in HIV care programs in Kenya and</li> </ul>                                                                                                                                                                                                                                                                                                                                                                                                                                                                                                                                                                                                                                                                                                  |

|                                     |                                                           |                                                                                                                                                                                    |                                                                                                                                                                                                                                                                          |                                                                                                                                                                                             |                                                                                                                                                                                                                                                                                                                                                                                                                                                                                                            |
|-------------------------------------|-----------------------------------------------------------|------------------------------------------------------------------------------------------------------------------------------------------------------------------------------------|--------------------------------------------------------------------------------------------------------------------------------------------------------------------------------------------------------------------------------------------------------------------------|---------------------------------------------------------------------------------------------------------------------------------------------------------------------------------------------|------------------------------------------------------------------------------------------------------------------------------------------------------------------------------------------------------------------------------------------------------------------------------------------------------------------------------------------------------------------------------------------------------------------------------------------------------------------------------------------------------------|
|                                     |                                                           | antiretroviral-based HIV prevention to HIV serodiscordant couples in public health facilities in Kenya and the incremental cost of providing PrEP as a component of this strategy. | <p><b>Population:</b><br/>Heterosexual couples</p> <p><b>Sample size (total – N):</b><br/>N/A</p> <p><b>Gender distribution:</b><br/>none provided</p> <p><b>Age distribution:</b><br/>No age disaggregation</p>                                                         |                                                                                                                                                                                             | similar settings. These costs can be used for budgetary planning and cost effectiveness analyses.                                                                                                                                                                                                                                                                                                                                                                                                          |
| n/a<br><b>Modelling<sup>e</sup></b> | Ngure et al. (2020) <sup>30</sup><br><br>Kenya and Uganda | Manuscript<br><br>To estimate the associations between effective contraceptive use and 1) PrEP dispensation 2) high effective PrEP use                                             | <p><b>Study population:</b><br/>Offered to use PrEP services</p> <p><b>Sample Population:</b><br/><b>Sample size (total – N):</b> 311</p> <p><b>Gender distribution:</b><br/>Female: 100%</p> <p><b>Age distribution:</b><br/>Median age: 29 years ([IQR] 24.0-35.0)</p> | <p><b>Nature of Intervention:</b><br/>HIV-uninfected women were provided with both PrEP and effective contraception</p> <p><b>Intervention components:</b> PrEP was integrated with ART</p> | <ul style="list-style-type: none"> <li>• PrEP dispensation was more frequent among those concurrently using effective contraception, (adjusted relative risk [aRR]=1.19; 95% confidence interval [CI]=1.08-1.32) and contraceptive use was more common among those on PrEP (aRR=1.63; 95% CI=1.18-2.25).</li> <li>• Healthcare delivery models that integrate the provision of family planning and PrEP may successfully promote both preventive products, especially long-acting contraception</li> </ul> |

a. Conducted in the context of the Girl Power study b. Conducted in the context of the PrEP Implementation in Young Women and Adolescents (PrYA) study c. Conducted in the context of the Prevention Option for Women Evaluation Research (POWER) project d. Conducted in the context of the Sustainable East Africa *Research* in Community Health (SEARCH) study e. Implemented within The Partners Demonstration Project



| Author                                                                                                                                                                                            | Item |   |   |   |   |     |   |   |   |    | 11 |
|---------------------------------------------------------------------------------------------------------------------------------------------------------------------------------------------------|------|---|---|---|---|-----|---|---|---|----|----|
|                                                                                                                                                                                                   | 1    | 2 | 3 | 4 | 5 | 6   | 7 | 8 | 9 | 10 |    |
| <b>Qualitative studies using the CASP Tool <sup>22</sup></b>                                                                                                                                      |      |   |   |   |   |     |   |   |   |    |    |
| Atujuna et al., 2018 <sup>51</sup>                                                                                                                                                                | +    | + | + | + | + | +   | + | + | + | +  |    |
| Bassett et al., 2019 <sup>46</sup>                                                                                                                                                                | +    | + | + | ? | + | ?   | + | + | + | +  |    |
| Bell et al., 2019 <sup>36*</sup>                                                                                                                                                                  | +    | + | + | ? | ? | -   | - | ? | - | ?  |    |
| Camlin et al., 2020 <sup>42</sup>                                                                                                                                                                 | +    | + | + | + | + | +   | + | + | + | +  |    |
| Gombe et al., 2020 <sup>44</sup>                                                                                                                                                                  | +    | + | ? | ? | + | +   | + | + | + | +  |    |
| Jani et al., <sup>55</sup>                                                                                                                                                                        | +    | + | + | ? | ? | -   | ? | ? | + | ?  |    |
| Makyao et al., <sup>56</sup>                                                                                                                                                                      | +    | + | + | ? | ? | -   | - | ? | ? | ?  |    |
| Maseko et al., <sup>25</sup>                                                                                                                                                                      | +    | ? | - | - | + | ?   | - | + | ? | ?  |    |
| Ngure et al., 2016 <sup>38</sup>                                                                                                                                                                  | +    | + | + | + | + | +   | + | + | + | +  |    |
| Pintye et al., 2019 <sup>29</sup>                                                                                                                                                                 | +    | + | + | ? | + | ?   | ? | ? | + | +  |    |
| Ware et al., 2018 <sup>50</sup>                                                                                                                                                                   | +    | + | + | + | + | ?   | + | ? | ? | ?  |    |
| Morton et al., 2020 <sup>48*</sup>                                                                                                                                                                | +    | + | + | + | + | -   | + | ? | + | +  |    |
| Were et al., 2020 <sup>35*</sup>                                                                                                                                                                  | +    | + | + | + | + | +   | + | + | + | +  |    |
| Sack et al., 2021 <sup>51</sup>                                                                                                                                                                   | +    | + | + | + | + | +   | + | + | + | +  |    |
| <b>Comparative studies including randomised trials, nonrandomised trials, interrupted time series and controlled-before after studies using the EPOC tool <sup>21</sup></b>                       |      |   |   |   |   |     |   |   |   |    |    |
| Delany-Moretlwe et al., 2018 <sup>34</sup>                                                                                                                                                        | ?    | ? | + | ? | ? | ?   | ? | ? | ? |    |    |
| Koss et al., 2018 <sup>39</sup>                                                                                                                                                                   | -    | ? | + | + | ? | +   | + | + | + |    |    |
| Donnell et al., 2021 <sup>34</sup>                                                                                                                                                                | ?    | ? | + | + | ? | ?   | ? | + | + |    |    |
| <b>Studies involving descriptions of interventions, implementation or policy processes with very limited empirical data and other non-conventional sources using the WEIRD tool <sup>23</sup></b> |      |   |   |   |   |     |   |   |   |    |    |
| Baetan et al., 2016 <sup>52</sup>                                                                                                                                                                 | +    | + | + | ! | + | N/A | ! | + | + | +  | +  |
| Bassett et al., 2018 <sup>45</sup>                                                                                                                                                                | +    | + | ? | + | + | +   | ? | + | + | +  | +  |
| Bell et al., 2019 <sup>36*</sup>                                                                                                                                                                  | !    | - | - | ? | ? | ?   | ? | - | ? | -  | -  |
| Heffron et al., 2018 <sup>49</sup>                                                                                                                                                                | +    | ? | ! | ? | ? | +   | ? | + | + | +  | +  |
| Heffron et al., 2018 <sup>37</sup>                                                                                                                                                                | +    | ! | ! | ! | - | !   | ? | ? | ? | +  | +  |

|                                    |   |   |   |   |     |     |   |   |   |   |   |
|------------------------------------|---|---|---|---|-----|-----|---|---|---|---|---|
| Kinuthia et al.,2020 <sup>28</sup> | + | + | + | ! | ?   | N/A | ! | ! | ! | + | + |
| Koss et al., 2020 <sup>40</sup>    | ? | ? | ? | ? | ?   | ?   | ? | ? | ? | ? | ? |
| Koss et al.,2017 <sup>43</sup>     | - | - | - | - | -   | +   | ? | ? | + | ? | - |
| Lubwama et al., 2019 <sup>47</sup> | - | + | - | ? | N/A | !   | - | - | ? | + | - |
| Mayer et al.,2019 <sup>41</sup>    | + | + | + | + | +   | N/A | ! | + | + | + | + |
| Mugwanya et al.,2019 <sup>26</sup> | + | + | ? | ? | !   | !   | ! | ! | ! | + | ! |
| Ongwen et al.,2019 <sup>32</sup>   | ! | ! | ? | ! | +   | N/A | ! | - | ! | ? | - |
| Pintye et al.,2018 <sup>27</sup>   | + | ! | ! | ! | ?   | ?   | ? | ! | ! | ? | ? |
| Rousseau et al.,2019 <sup>33</sup> | ? | ? | ? | ? | ?   | ?   | ? | ? | ? | ? | ? |
| Travill et al.,2018 <sup>31</sup>  | ! | ? | ? | ! | ?   | ?   | ? | - | - | - | - |
| Hill et al.,2020 <sup>30</sup>     | + | + | + | + | +   | +   | + | + | + | + | + |
| Morton et al.,2020 <sup>48*</sup>  | + | + | + | + | +   | +   | + | + | + | ! | + |
| Minnis et al.,2020 <sup>54</sup>   | + | + | + | + | +   | +   | + | + | + | + | + |
| Were et al.,2020 <sup>35*</sup>    | + | + | + | + | +   | +   | + | + | + | + | + |

+ = Yes/Low risk/No or very minor concerns; - = No/High risk/Serious concerns; ? = Can't tell/Unclear risk/Moderate concerns; ! = Minor concerns

\*Mixed methods study, Modelling studies were not appraised

## Preferred Reporting Items for Systematic reviews and Meta-Analyses extension for Scoping Reviews (PRISMA-ScR) Checklist

| SECTION                                               | ITEM | PRISMA-ScR CHECKLIST ITEM                                                                                                                                                                                                                                                                                  | REPORTED ON PAGE # |
|-------------------------------------------------------|------|------------------------------------------------------------------------------------------------------------------------------------------------------------------------------------------------------------------------------------------------------------------------------------------------------------|--------------------|
| <b>TITLE</b>                                          |      |                                                                                                                                                                                                                                                                                                            |                    |
| Title                                                 | 1    | Identify the report as a scoping review.                                                                                                                                                                                                                                                                   | 1                  |
| <b>ABSTRACT</b>                                       |      |                                                                                                                                                                                                                                                                                                            |                    |
| Structured summary                                    | 2    | Provide a structured summary that includes (as applicable): background, objectives, eligibility criteria, sources of evidence, charting methods, results, and conclusions that relate to the review questions and objectives.                                                                              | 2                  |
| <b>INTRODUCTION</b>                                   |      |                                                                                                                                                                                                                                                                                                            |                    |
| Rationale                                             | 3    | Describe the rationale for the review in the context of what is already known. Explain why the review questions/objectives lend themselves to a scoping review approach.                                                                                                                                   | 3-5                |
| Objectives                                            | 4    | Provide an explicit statement of the questions and objectives being addressed with reference to their key elements (e.g., population or participants, concepts, and context) or other relevant key elements used to conceptualize the review questions and/or objectives.                                  | 5                  |
| <b>METHODS</b>                                        |      |                                                                                                                                                                                                                                                                                                            |                    |
| Protocol and registration                             | 5    | Indicate whether a review protocol exists; state if and where it can be accessed (e.g., a Web address); and if available, provide registration information, including the registration number.                                                                                                             | 6                  |
| Eligibility criteria                                  | 6    | Specify characteristics of the sources of evidence used as eligibility criteria (e.g., years considered, language, and publication status), and provide a rationale.                                                                                                                                       | 6-7                |
| Information sources*                                  | 7    | Describe all information sources in the search (e.g., databases with dates of coverage and contact with authors to identify additional sources), as well as the date the most recent search was executed.                                                                                                  | 7                  |
| Search                                                | 8    | Present the full electronic search strategy for at least 1 database, including any limits used, such that it could be repeated.                                                                                                                                                                            | 7                  |
| Selection of sources of evidence†                     | 9    | State the process for selecting sources of evidence (i.e., screening and eligibility) included in the scoping review.                                                                                                                                                                                      | 7                  |
| Data charting process‡                                | 10   | Describe the methods of charting data from the included sources of evidence (e.g., calibrated forms or forms that have been tested by the team before their use, and whether data charting was done independently or in duplicate) and any processes for obtaining and confirming data from investigators. | 7                  |
| Data items                                            | 11   | List and define all variables for which data were sought and any assumptions and simplifications made.                                                                                                                                                                                                     | 7                  |
| Critical appraisal of individual sources of evidence§ | 12   | If done, provide a rationale for conducting a critical appraisal of included sources of evidence; describe the methods used and how this information was used in any data synthesis (if appropriate).                                                                                                      | 7                  |

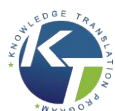

| SECTION                                       | ITEM | PRISMA-ScR CHECKLIST ITEM                                                                                                                                                                       | REPORTED ON PAGE # |
|-----------------------------------------------|------|-------------------------------------------------------------------------------------------------------------------------------------------------------------------------------------------------|--------------------|
| Synthesis of results                          | 13   | Describe the methods of handling and summarizing the data that were charted.                                                                                                                    | 8                  |
| <b>RESULTS</b>                                |      |                                                                                                                                                                                                 |                    |
| Selection of sources of evidence              | 14   | Give numbers of sources of evidence screened, assessed for eligibility, and included in the review, with reasons for exclusions at each stage, ideally using a flow diagram.                    | 8-9                |
| Characteristics of sources of evidence        | 15   | For each source of evidence, present characteristics for which data were charted and provide the citations.                                                                                     | 9-28               |
| Critical appraisal within sources of evidence | 16   | If done, present data on critical appraisal of included sources of evidence (see item 12).                                                                                                      | 29                 |
| Results of individual sources of evidence     | 17   | For each included source of evidence, present the relevant data that were charted that relate to the review questions and objectives.                                                           | 29-33              |
| Synthesis of results                          | 18   | Summarize and/or present the charting results as they relate to the review questions and objectives.                                                                                            | 29-33              |
| <b>DISCUSSION</b>                             |      |                                                                                                                                                                                                 |                    |
| Summary of evidence                           | 19   | Summarize the main results (including an overview of concepts, themes, and types of evidence available), link to the review questions and objectives, and consider the relevance to key groups. | 33-36              |
| Limitations                                   | 20   | Discuss the limitations of the scoping review process.                                                                                                                                          | 36                 |
| Conclusions                                   | 21   | Provide a general interpretation of the results with respect to the review questions and objectives, as well as potential implications and/or next steps.                                       | 36                 |
| <b>FUNDING</b>                                |      |                                                                                                                                                                                                 |                    |
| Funding                                       | 22   | Describe sources of funding for the included sources of evidence, as well as sources of funding for the scoping review. Describe the role of the funders of the scoping review.                 | 37                 |

JBI = Joanna Briggs Institute; PRISMA-ScR = Preferred Reporting Items for Systematic reviews and Meta-Analyses extension for Scoping Reviews.

\* Where *sources of evidence* (see second footnote) are compiled from, such as bibliographic databases, social media platforms, and Web sites.

† A more inclusive/heterogeneous term used to account for the different types of evidence or data sources (e.g., quantitative and/or qualitative research, expert opinion, and policy documents) that may be eligible in a scoping review as opposed to only studies. This is not to be confused with *information sources* (see first footnote).

‡ The frameworks by Arksey and O'Malley (6) and Levac and colleagues (7) and the JBI guidance (4, 5) refer to the process of data extraction in a scoping review as data charting.

§ The process of systematically examining research evidence to assess its validity, results, and relevance before using it to inform a decision. This term is used for items 12 and 19 instead of "risk of bias" (which is more applicable to systematic reviews of interventions) to include and acknowledge the various sources of evidence that may be used in a scoping review (e.g., quantitative and/or qualitative research, expert opinion, and policy document).

From: Tricco AC, Lillie E, Zarin W, O'Brien KK, Colquhoun H, Levac D, et al. PRISMA Extension for Scoping Reviews (PRISMA-ScR): Checklist and Explanation. *Ann Intern Med.* 2018;169:467–473. doi: [10.7326/M18-0850](https://doi.org/10.7326/M18-0850).

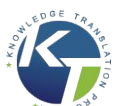

St. Michael's

Inspired Care.  
Inspiring Science.

For peer review only - <http://bmjopen.bmj.com/site/about/guidelines.xhtml>

# BMJ Open

## Service delivery models that promote linkages to PrEP for adolescent girls and young women and men in sub-Saharan Africa: A scoping review

|                                 |                                                                                                                                                                                                                                                                                                                                                                                                                                                                                                                                                                                                                                                                                                                                                                                                                                                                                                                                                                                                                                                                                                                                                                                                                                                                                                                                                                                                                                                                                                                                                                  |
|---------------------------------|------------------------------------------------------------------------------------------------------------------------------------------------------------------------------------------------------------------------------------------------------------------------------------------------------------------------------------------------------------------------------------------------------------------------------------------------------------------------------------------------------------------------------------------------------------------------------------------------------------------------------------------------------------------------------------------------------------------------------------------------------------------------------------------------------------------------------------------------------------------------------------------------------------------------------------------------------------------------------------------------------------------------------------------------------------------------------------------------------------------------------------------------------------------------------------------------------------------------------------------------------------------------------------------------------------------------------------------------------------------------------------------------------------------------------------------------------------------------------------------------------------------------------------------------------------------|
| Journal:                        | <i>BMJ Open</i>                                                                                                                                                                                                                                                                                                                                                                                                                                                                                                                                                                                                                                                                                                                                                                                                                                                                                                                                                                                                                                                                                                                                                                                                                                                                                                                                                                                                                                                                                                                                                  |
| Manuscript ID                   | bmjopen-2022-061503.R1                                                                                                                                                                                                                                                                                                                                                                                                                                                                                                                                                                                                                                                                                                                                                                                                                                                                                                                                                                                                                                                                                                                                                                                                                                                                                                                                                                                                                                                                                                                                           |
| Article Type:                   | Original research                                                                                                                                                                                                                                                                                                                                                                                                                                                                                                                                                                                                                                                                                                                                                                                                                                                                                                                                                                                                                                                                                                                                                                                                                                                                                                                                                                                                                                                                                                                                                |
| Date Submitted by the Author:   | 17-Oct-2022                                                                                                                                                                                                                                                                                                                                                                                                                                                                                                                                                                                                                                                                                                                                                                                                                                                                                                                                                                                                                                                                                                                                                                                                                                                                                                                                                                                                                                                                                                                                                      |
| Complete List of Authors:       | Chirinda, Witness; South African Medical Research Council, Health Systems Research Unit<br>Ramraj, Trisha; South African Medical Research Council Durban, HIV Prevention Research Unit<br>Jonas, Kim; South African Medical Research Council, Health Systems Research<br>Govindasamy, D.; South African Medical Research Council, Health Systems Research Unit; University of Cape Town, Adolescent Health Research Unit<br>Jama, N.; South African Medical Research Council, Burden of Disease Research Unit<br>McClinton Appollis, Tracy; South African Medical Research Council, Health Systems Research Unit; University of Cape Town, Adolescent Health Research Unit<br>Zani, Babalwa; South African Medical Research Council, Burden of Disease Research Unit<br>Mukumbang, Ferdinand; South African Medical Research Council, Burden of Disease Research Unit<br>Basera, W.; South African Medical Research Council, Burden of Disease Research Unit<br>Hlongwa, Mbuzeleni ; South African Medical Research Council, Burden of Disease Research Unit<br>Turawa, Eunice; South African Medical Research Council, Burden of Disease Research Unit; Stellenbosch University Faculty of Medicine and Health Sciences, Community health<br>Mathews, C.; South African Medical Research Council, Health Systems Research Unit; University of Cape Town, Adolescent Health Research Unit<br>Nicol, Edward; South African Medical Research Council, Burden of Disease Research Unit, Tygerberg; Stellenbosch University, Faculty of Medicine and Health Sciences |
| <b>Primary Subject Heading</b>: | HIV/AIDS                                                                                                                                                                                                                                                                                                                                                                                                                                                                                                                                                                                                                                                                                                                                                                                                                                                                                                                                                                                                                                                                                                                                                                                                                                                                                                                                                                                                                                                                                                                                                         |
| Secondary Subject Heading:      | Public health                                                                                                                                                                                                                                                                                                                                                                                                                                                                                                                                                                                                                                                                                                                                                                                                                                                                                                                                                                                                                                                                                                                                                                                                                                                                                                                                                                                                                                                                                                                                                    |
| Keywords:                       | PUBLIC HEALTH, HIV & AIDS < INFECTIOUS DISEASES, Public health < INFECTIOUS DISEASES                                                                                                                                                                                                                                                                                                                                                                                                                                                                                                                                                                                                                                                                                                                                                                                                                                                                                                                                                                                                                                                                                                                                                                                                                                                                                                                                                                                                                                                                             |

1  
2  
3  
4  
5  
6  
7  
8  
9  
10  
11  
12  
13  
14  
15  
16  
17  
18  
19  
20  
21  
22  
23  
24  
25  
26  
27  
28  
29  
30  
31  
32  
33  
34  
35  
36  
37  
38  
39  
40  
41  
42  
43  
44  
45  
46  
47  
48  
49  
50  
51  
52  
53  
54  
55  
56  
57  
58  
59  
60

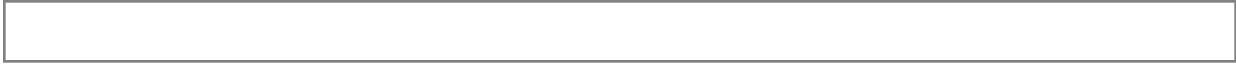

SCHOLARONE™  
Manuscripts



I, the Submitting Author has the right to grant and does grant on behalf of all authors of the Work (as defined in the below author licence), an exclusive licence and/or a non-exclusive licence for contributions from authors who are: i) UK Crown employees; ii) where BMJ has agreed a CC-BY licence shall apply, and/or iii) in accordance with the terms applicable for US Federal Government officers or employees acting as part of their official duties; on a worldwide, perpetual, irrevocable, royalty-free basis to BMJ Publishing Group Ltd ("BMJ") its licensees and where the relevant Journal is co-owned by BMJ to the co-owners of the Journal, to publish the Work in this journal and any other BMJ products and to exploit all rights, as set out in our [licence](#).

The Submitting Author accepts and understands that any supply made under these terms is made by BMJ to the Submitting Author unless you are acting as an employee on behalf of your employer or a postgraduate student of an affiliated institution which is paying any applicable article publishing charge ("APC") for Open Access articles. Where the Submitting Author wishes to make the Work available on an Open Access basis (and intends to pay the relevant APC), the terms of reuse of such Open Access shall be governed by a Creative Commons licence – details of these licences and which [Creative Commons](#) licence will apply to this Work are set out in our licence referred to above.

Other than as permitted in any relevant BMJ Author's Self Archiving Policies, I confirm this Work has not been accepted for publication elsewhere, is not being considered for publication elsewhere and does not duplicate material already published. I confirm all authors consent to publication of this Work and authorise the granting of this licence.

**Title**

Service delivery models that promote linkages to PrEP for adolescent girls and young women and men in sub-Saharan Africa: A scoping review

**Authors**

Witness Chirinda<sup>1</sup>; \*Trisha Ramraj<sup>2</sup>; Kim Jonas<sup>1,3</sup>; Darshini Govindasamy<sup>1,3</sup>; Ngcwalisa Jama<sup>4</sup>; Tracy McClinton Appollis<sup>1,3</sup>; Babalwa Zani<sup>4</sup>; Ferdinand Mukumbang<sup>4</sup>; Wisdom Basera<sup>4</sup>; Mbuzeleni Hlongwa<sup>4,5</sup>; Eunice Turawa<sup>4</sup>; Catherine Mathews<sup>1,3</sup>; Edward Nicol<sup>4,6</sup>

**Author Affiliations**

<sup>1</sup>Health Systems Research Unit, South Africa Medical Research Council, Cape Town, South Africa

<sup>2</sup>HIV Prevention Research Unit, South Africa Medical Research Council, Cape Town, South Africa

<sup>3</sup>Adolescent Health Research Unit, Division of Child and Adolescent Psychiatry, Faculty of Health Sciences, University of Cape Town, Cape Town, South Africa

<sup>4</sup>Burden of Disease Research Unit, South African Medical Research Council, Cape Town, South Africa

<sup>5</sup>School of Nursing and Public Health, University of KwaZulu-Natal, Durban, South Africa.

<sup>6</sup>Health Systems and Public Health Division, Faculty of Medicine and Health Sciences, Stellenbosch University, Cape Town, South Africa

**\*Corresponding author:** Trisha Ramraj, HIV Prevention Research Unit, South African Medical Research Council, 491 Peter Mokaba Road, Durban, 4093, South Africa.

*E-mail address:* [trisha.ramraj@mrc.ac.za](mailto:trisha.ramraj@mrc.ac.za)



## Abstract

**Background:** Pre-exposure prophylaxis (PrEP) is an emerging biomedical prevention intervention. Documenting PrEP service delivery models (SDMs) that promote linkage to and continuation of PrEP will inform guidelines and maximise roll out.

**Objectives:** To synthesize and appraise the effectiveness and feasibility of PrEP SDMs designed to promote linkage to PrEP care among adolescent girls and young women (AGYW) and men in sub-Saharan Africa (SSA).

**Eligibility criteria:** Primary quantitative and qualitative studies published in English and conducted in SSA were included. No restrictions on the date of publication were applied.

**Sources of evidence:** Methodology outlined in the Joanna Briggs Institute reviewers' manual was followed. PubMed, Cochrane library, Scopus, Web of Science, and online-conference abstract archives were searched.

**Charting methods:** Data on article, population, intervention characteristics and key outcomes was charted in REDCap.

**Results and Conclusion:** Of the 1204 identified records, 37 (met the inclusion criteria. Health facility-based integrated models of PrEP delivery with family planning, maternal and child health or sexual and reproductive services to AGYW resulted in PrEP initiation of 16-90%. Community-based drop-in centres (66%) was the preferred PrEP outlet for AGYW compared to public clinics (25%) and private clinics (9%). Most men preferred community-based delivery models. Among individuals who initiated PrEP, 50% were men, 62% were <35 years old and 97% were tested at health fairs compared to home testing. Integrated antiretroviral therapy (ART)-PrEP delivery was favoured among serodiscordant couples with 82.9% of couples using PrEP or ART with no HIV seroconversions. PrEP initiation within healthcare facilities was increased by perceived client-friendly services and non-judgmental healthcare workers. Barriers to PrEP initiation included distance to travel to and time spent at health facilities and perceived community stigma. PrEP SDMs for AGYW and men need to be tailored to the needs and preferences for each group. Programme implementers should promote community-based SDMs to increase PrEP initiation among AGYW and men.

**Key words:** Pre-exposure prophylaxis, PrEP, linkage, adolescent girls, and young women, AGYW, men, sub-Saharan Africa

### Strengths and limitations of this study

- A comprehensive search strategy was developed, and the search was carried out across multiple databases and conference archives.
- The methodology used in the scoping review was robust and included double data screening, extraction and synthesis.
- All included studies underwent critical appraisal of sources of evidence using approved tools.
- Studies not conducted in SSA and that were published in non-English languages were excluded.
- Most of the included studies were from Kenya, Uganda, and South Africa limiting the generalizability of the results.

### Background

Recent reports indicate a decline in new HIV infections globally. However, this decline is occurring at a slower pace in regions with generalized HIV epidemics such as sub-Saharan Africa (SSA). In 2017, SSA accounted for 64% of new HIV infections globally.<sup>1</sup> Two underserved populations that are critical to drive the decline in new HIV infections are adolescent girls and young women (AGYW; 15-24 years) and men (25-65 years). AGYW are at substantial risk for HIV-infection with an estimated 310 000 new infections globally in 2018 – 86% of which was in SSA.<sup>1</sup> Men, on the other hand, account for more AIDS-related deaths globally than women – 400 000 deaths in men in 2018 compared to 270 000 in woman.<sup>1</sup>

For differing reasons, AGYW and men show lower health seeking behaviour because of interpersonal and structural factors. AGYW's access to health services is limited by stigma, negative attitudes from healthcare workers and inconvenient clinic operating hours.<sup>2</sup> However, 'man unfriendly clinics' are characterised by inaccessible clinic hours/locations, difficulty in engaging with female staff, and gender norms that discourage men from accessing health services.<sup>3 4</sup>

Amongst the 2020 Global Prevention Targets and Commitments is the reduction in the number of AGYW newly infected with HIV globally to below 100 000, and to ensure that 3 million people at substantial risk of contracting HIV have access to pre-exposure prophylaxis (PrEP).<sup>5</sup> To achieve these targets, primary prevention programmes should be structured around five central pillars: (1) combination prevention for AGYW; (2) combination prevention with key populations; (3) voluntary medical male circumcision (VMMC) and sexual and reproductive health services (SRHS) for men and boys; (4) comprehensive condom

1  
2  
3 programmes; and (5) rapid introduction of PrEP.<sup>5</sup> PrEP for HIV refers to the use of  
4 antiretroviral drugs among HIV-negative people to prevent the acquisition of HIV.<sup>6</sup>  
5  
6

7 PrEP has shown effectiveness in reducing HIV acquisition among couples, sex workers, men  
8 who have sex with men (MSM), transgender and people who inject drugs and AGYW.<sup>7</sup> The  
9 impact of PrEP on the HIV epidemic depends on the extent of PrEP initiation among people  
10 at substantial risk for HIV infection (World Health Organization (WHO) defined substantial risk  
11 of HIV acquisition as HIV incidence of 3 per 100 person-years or higher in the absence of  
12 PrEP).<sup>7,8</sup> Since September 2015, the WHO recommended offering oral PrEP to every person  
13 at substantial risk of contracting HIV.<sup>7</sup> In the current South African guidelines for PrEP, specific  
14 populations considered to be at substantial risk of HIV infection include AGYW, MSM, people  
15 with more than one sexual partner, people who inject drugs, people with a recent history of  
16 sexually transmitted infections, people who recognise their own risk and request PrEP,  
17 serodiscordant couples if the HIV positive partner is not virally suppressed, and sex  
18 workers.<sup>9,10</sup>  
19  
20  
21  
22  
23  
24  
25

26 Literature on PrEP has largely been focused on knowledge, attitudes, and interest in PrEP. As  
27 countries scale up use of PrEP as part of their combination prevention packages, evidence on  
28 service delivery models (SDMs) that promote initiation and continuation on PrEP are needed  
29 especially among vulnerable and hard to reach populations such as AGYW and men. HIV  
30 prevention cascades have been proposed as a logical framework to monitor populations at  
31 substantial risk for HIV acquisition as they navigate the steps from HIV testing to assessing the  
32 risk of the individual to determining PrEP eligibility before PrEP initiation and continuation or  
33 discontinuation.  
34  
35  
36  
37

38 PrEP initiation represents a critical step in the PrEP cascade (Figure 1),<sup>8,10</sup> because it reflects  
39 people's awareness and interest in lowering their risk for HIV. Differentiated models, which  
40 are centred around clients' needs and expectations and relieving unnecessary burdens on the  
41 health system while targeting behavioural and structural determinants of AGYW and men,  
42 can potentially increase acceptability and accessibility of PrEP. These include innovative  
43 strategies that streamline HIV testing, link AGYW and men to HIV prevention services, provide  
44 differentiating medication access points, reduce stigma and barriers of parental consent for  
45 PrEP initiation.<sup>11</sup> PrEP SDMs should be designed with the populations being served central to  
46 the design.<sup>12</sup>  
47  
48  
49  
50  
51  
52  
53  
54  
55  
56  
57  
58  
59  
60

[Insert Figure 1 here]

**Figure 1: Oral PrEP cascade: Adapted from Dunbar et al (2018)<sup>8</sup>**

Following an HIV-negative diagnosis (step 1), an individual is assessed for risk of HIV (step 2). An individual at substantial risk of HIV acquisition or who requests pre-exposure prophylaxis (PrEP) is assessed for eligibility for PrEP (step 3). After documenting eligibility for PrEP use, several baseline clinical investigations are conducted (step 4) PrEP is initiated (step 5) on the same-day as HIV testing. The recommended regimen is Tenofovir (TDF) / emtricitabine (FTC) 1 tablet by mouth daily. PrEP continuation visits (step 6) include: month 1, every 3 months. PrEP is discontinued (step 7) if the individual tests HIV positive, develops renal disease, is non-adherent, does not want or need PrEP, no longer meets eligibility criteria, or if there are safety concerns.

PrEP is an emerging prevention implementation science (IS) research area. However, at present, there is a gap in knowledge on the characteristics of AGYW and men who initiate PrEP compared to those who do not initiate PrEP. This information is critical for informing national policies and implementation guidelines for PrEP roll-out. As such, the aim of this review was to synthesize and appraise the effectiveness and feasibility of PrEP SDMs designed to promote linkage to care among AGYW and men eligible for PrEP in SSA. The objectives were to a) summarize SDMs that promote PrEP initiation and b) explore users' perceptions, and barriers and facilitators of these models.

## Methods

We used a scoping review design to map existing literature, explore the research studies conducted and identify research and knowledge gaps in models used to deliver PrEP.<sup>13</sup> Scoping reviews can be of particular use when the topic has not yet been extensively reviewed or is of a complex or heterogeneous nature.<sup>14</sup> The research question was defined using the Population- Intervention-Comparison-Outcome (PICO) framework (Table 1). We defined our outcomes as i) Linkage to PrEP care (defined as the proportion of AGYW or men who are initiated on PrEP following an HIV-negative diagnosis, step 7 of Figure 1) and ii) perceptions, barriers, and facilitators of SDMs. The service delivery model was defined as the setting used for delivery of PrEP viz. facility-only, community-only, research-only, mobile-only and a hybrid model encompassing two or more of the above settings.

**Table 1:** Scoping review population, intervention, and outcome

|              |                                                                                                                                                      |
|--------------|------------------------------------------------------------------------------------------------------------------------------------------------------|
| Population   | Heterosexual females (15-24 years) and men (25-65 years)                                                                                             |
| Intervention | Interventions (SDMs) designed to improve PrEP initiation                                                                                             |
| Comparison   | Not applicable                                                                                                                                       |
| Outcome      | Linkage to PrEP care (defined as the proportion of AGYW or men who are initiated on PrEP following a HIV-negative diagnosis) and perceptions on SDMs |

### Protocol and registration

This review was conducted and reported in line with the Joanna Briggs Institute (JBI) reviewer's manual and structured using the Preferred Reporting Items for Systematic Reviews and Meta-Analyses extension for scoping reviews (PRISMA-ScR).<sup>15 16</sup> A review protocol for this scoping review was registered with the Open Science Framework (DOI 10.17605/OSF.IO/EG9TD).

### Research ethics approval

The scoping review focuses on published research in the public domain therefore no ethics approval is required.

### Patient and public involvement

No patients or public were involved in the study.

### Eligibility criteria

We included primary studies on PrEP service delivery models for AGYW and men, with both qualitative and quantitative study designs published in English and conducted in SSA. No restrictions on the date of publication were applied. Table 2 details the inclusion criteria applied to studies. We excluded studies that were focused exclusively on key population groups in HIV programmes such as lesbian, gay, bisexual, MSM etc. and publication types (e.g., systematic reviews, case studies, etc).

**Table 2:** Eligibility criteria describing study inclusion criteria for the scoping review

|            |                                                                                                                                                                                                                                                                                  |
|------------|----------------------------------------------------------------------------------------------------------------------------------------------------------------------------------------------------------------------------------------------------------------------------------|
| Study type | Quantitative studies including randomized clinical trials (RCT), quasi-randomized, and non-RCTs, longitudinal observational (historical cohorts, prospective cohorts, case-control, and before-and-after studies), analytic cross-sectional studies, and non-comparative studies |
|            | Qualitative studies using any study design                                                                                                                                                                                                                                       |
| Population | Study population included heterosexual females (15-24 years) and males (25-65 years)                                                                                                                                                                                             |
| Outcomes   | Focus of research: PrEP SDMs i.e., service provision / IS / models of care / differentiated care / linkage to care / intervention                                                                                                                                                |
|            | Papers reporting on barriers and facilitators of PrEP SDMs                                                                                                                                                                                                                       |
|            | Papers on user perceptions of PrEP SDMs                                                                                                                                                                                                                                          |
| Setting    | Sub-Saharan African countries – based on the World Bank's country classification <sup>17</sup>                                                                                                                                                                                   |

### Information sources and search strategy

PubMed, Cochrane library, Scopus, and Web of Science including three online conference archives (AIDS conference, Conference on Retroviruses and Opportunistic Infections and International AIDS Society Conference on HIV Science) were searched. The reference list of systematic reviews was checked to identify relevant primary studies. The three-step search strategy recommended by the JBI Reviewer's Manual was used.<sup>15</sup> During the first step, one author (WC) conducted an elementary search on PubMed to establish the volume of relevant articles on the topic. Two authors (WC and TR) then screened the title and abstract of the retrieved articles to identify keywords and index terms which were used to build a search strategy (see online supplementary appendix 1). The final search results were exported into EndNote,<sup>18</sup> and duplicates were removed.

### Selection of sources of evidence

Titles and abstracts were double screened in Rayyan<sup>19</sup> by any two of a group of eight independent authors (TR, WC, KJ, NJ, DG, TMA, MH, ET). There was no restriction placed on age range during the screening phase to ensure that articles with age disaggregated analysis were included. Full text articles and conference abstracts, including articles from the 2020 AIDS conference were retrieved and independently double screened by WC and TR.

### Data charting process and data items

Using a pre-designed data-charting form, key and relevant information were systematically extracted from full-text articles in REDCap<sup>20</sup> by any two of a group of ten independent authors (TR, WC, TMA, NJ, DG, BZ, CM, MH, ET, EN). We charted data on article characteristics, population characteristics, intervention characteristics, and key outcomes (Table 1).

### Critical appraisal of individual sources of evidence

Information for quality assessment was incorporated into the data charting form on REDCap.<sup>20</sup> Due to the different study designs and research methodologies adopted in the included studies, we used three different tools to appraise the articles. For comparative studies including randomised trials, non-randomised trials, interrupted time-series and controlled before-after-studies, we used the risk of bias criteria recommended by the Effective Practice and Organisation of Care (EPOC).<sup>21</sup> For qualitative studies, we used the Critical Appraisal Skills Programme (CASP) checklist.<sup>22</sup> For other studies we used the Ways of Evaluating Important and Relevant Data (WEIRD) tool.<sup>23</sup> Modelling studies were excluded from the appraisal step.

### Analysis

For quantitative studies we used a narrative analysis and tabulated data by gender and by SDM. We summarized the settings, populations, and sample for each group, along with the

1  
2  
3 interventions and findings. For qualitative studies, we did a thematic analysis that resulted in  
4 organising the data into themes, authors' interpretations, and quotes and integrated these  
5 findings to support the quantitative data. We tabulated the data by SDMs (health facility,  
6 community, research, or mobile) and by population (AGYW only, men only, or models for  
7 both). Furthermore, we determined the existing gaps in the different categories of  
8 interventions that can be strengthened to promote initiation and continuation on PrEP among  
9 AGYW and men.  
10  
11  
12  
13  
14  
15

## 16 Results

### 17 Selection of sources of evidence

18 Our search identified 1604 citations. After duplicates (413) were removed, a total of 1204  
19 titles and abstracts were identified from searches of electronic databases and 13 from other  
20 sources including conferences. The PRISMA flow diagram (Figure 2) illustrates the screening  
21 process to identify records that meet the study inclusion criteria. Based on the screening of  
22 title and abstracts, 1102 records were excluded, with 102 full text articles and conference  
23 abstracts to be retrieved and assessed for eligibility. From the review of full text articles 67  
24 were excluded for the following reasons: editorials/commentaries/reviews/protocols,  
25 interviews with stakeholders, articles on topical PrEP, wrong outcome and focus on key  
26 populations. During data charting, two additional articles were excluded. Four additional  
27 articles were added after the initial search process, these articles were identified following  
28 the 2020 AIDS conference in July. The final number of studies that were considered eligible  
29 for this scoping review were 37 (27 studies and 10 conference abstracts).  
30  
31  
32  
33  
34  
35  
36  
37

38 [Insert Figure 2 here]

### 39 Figure 2: PRISMA flow diagram

40 Adapted from: Moher et al<sup>24</sup>

### 41 Description of sources of evidence

42 A description of the characteristics, setting, SDMs and intervention modalities of the included  
43 studies are provided in online supplementary appendix 2. There was a mixture of quantitative  
44 (n=23), qualitative (n=11) and mixed method studies (n=3). Most studies were  
45 demonstration/IS projects (n=10) while other methodological approaches included  
46 randomised controlled trials (RCTs) (n=5) and cross-sectional studies (n=5). Most were  
47 conducted in Kenya (n=17), with the remainder conducted in Uganda (n=10), South Africa  
48 (n=10), Tanzania (n=3), Malawi (n=2), Mozambique (n=2), and Zimbabwe (n=1). These studies  
49 reported evidence on the following PrEP SDMs; health facility (6), mobile (1), research site  
50 (8), community (6), hybrid (10), and not described/not applicable (6). Thirteen studies focused  
51 on AGYW, 19 studies focused on AGYW and men, one study focused on men only, and four  
52  
53  
54  
55  
56  
57  
58  
59  
60

1  
2  
3 were classified as other (i.e., age categories were not specified). PrEP services were offered  
4 in 25 of the 37 studies whilst PrEP perceptions/opinions were assessed in the other 12 studies.  
5  
6

### 7 **Critical appraisal of evidence**

8 Full text articles appraised using the WEIRD tool were mostly assessed as having either no or  
9 very minor or moderate concerns for items that were unclear in the article (see online  
10 supplementary appendix 3). Most of the qualitative studies or abstracts performed well on all  
11 items except on items 4 (the recruitment strategy was appropriate to the aims), 8 (the rigour  
12 of the data analysis) and 10 (the value of the research in terms of its contribution to the  
13 literature and/or policy and process). Due to limited information in the abstracts to clearly  
14 answer the items using the WEIRD tool, most of the abstracts were appraised as either having  
15 an unclear or serious risk of bias.<sup>25-30</sup>  
16  
17  
18  
19  
20  
21

### 22 **Results of sources of evidence**

#### 23 **PrEP SDMs for AGYW**

24 Amongst AGYW, PrEP SDMs included HF-B (n=6), hybrid (mobile clinic-healthcare facility or  
25 community-healthcare facility, n=3), research site (n=2) and mobile clinic (n=1) (see online  
26 supplementary appendix 2).  
27  
28  
29

#### 30 Health facility

31 Three studies from Kenya evaluated a HF-B delivery modality by integrating PrEP delivery into  
32 routine services. Mugwanya et al.<sup>31</sup> evaluated integrated delivery of PrEP in family planning  
33 (FP) clinics whilst Kinuthia et al. and Pintye et al. evaluated approaches to integrate PrEP into  
34 maternal and child health (MCH) clinics providing antenatal care (ANC) and post-natal care  
35 (PNC).<sup>32 33</sup> Integration of universal screening and counselling for PrEP in FP and MCH clinics  
36 resulted in PrEP initiation of 16% and 49.2% respectively among AGYW. Younger women ( $\leq 24$   
37 years) who initiated PrEP at MCH clinics were significantly more likely to return for a PrEP  
38 refill at month 3 compared to women  $>24$  years (54.9% versus 45.1%) ( $p=0.05$ ).<sup>32</sup> These  
39 studies utilised nurses dedicated to providing PrEP services only, which may limit applicability  
40 in a sub-Saharan setting where facilities have a limited clinical workforce. A study by Ngunjiri et  
41 al. which integrated PrEP with FP services found that PrEP dispensation was more frequent  
42 among those concurrently using effective contraception, (adjusted relative risk [aRR]=1.19;  
43 95% confidence interval [CI]=1.08-1.32) and contraceptive use was more common among  
44 those on PrEP (aRR=1.63; 95% CI=1.18-2.25).<sup>34</sup> Pintye et al. found that participants who  
45 initiated PrEP at MCH clinics took an additional 18 minutes for PrEP related activities over and  
46 above the time spent at the clinic to receive routine MCH services. The additional time could  
47 deter AGYW from initiating and continuing PrEP and depending on healthcare facility size and  
48 patient volume integrating PrEP into these routine services could result in several additional  
49 hours of work for nurses.<sup>33</sup>  
50  
51  
52  
53  
54  
55  
56  
57  
58  
59

#### 60 Hybrid (community-health facility)



Two studies evaluated the scaling up of PrEP in Kenya through integration into routine health services in drop-in centres (DICEs), public and private health facilities.<sup>28 35</sup> Ongwen et al. reported that within the context of the Jilinde project, which implements oral PrEP as a routine service at a public health scale in Kenya, 6.5% AGYW initiated PrEP, and DICEs were the preferred PrEP outlet for adolescent girls with 66% accessing services in DICEs, 25% in public clinics and 9% in private clinics. Amongst AGYW who initiated PrEP, the entry channel into the PrEP pathway was through peer educators and networks (50%); community outreaches (20%); and within health facilities (30%).<sup>28</sup> Were et al. found that among all individuals eligible for PrEP in the study which included female sex workers and MSM, 11% of AGYW initiated PrEP.<sup>35</sup> The majority (81%) of clients initiated PrEP through DICEs, whereas 14% and 5% were initiated through public and private facilities respectively. The majority of AGYW did not persist on PrEP use at month-1 (68% drop off) and month-3 (94% drop off) follow-ups. Qualitative evidence from this study found that AGYW who initiated PrEP in public and private health facilities reported insensitive referral and access to the PrEP delivery pathways where *"The (HIV) testing place is different from the place I was asked questions and the place for collecting the medicine is also different. We took long because we were walking from one place to another"*.<sup>35</sup>

#### Research site

Delany-Moretlwe conducted an RCT in Tanzania and South Africa to evaluate whether empowerment clubs increased PrEP initiation and continuation among AGYW. Participants were randomised to the standard of care (SoC), which included comprehensive SRHS, with counselling and short message service (SMS) reminders for PrEP users, or to empowerment clubs plus SoC. Across both arms, 97% initiated PrEP. PrEP continuation did not vary significantly by study arm and diminished with time (73% at Month-1, 61% at Month-3 and 34% at Month-6).<sup>36</sup> Donnell et al. found that HIV incidence declined significantly after on-site provision of PrEP at the research sites.<sup>37</sup> Hill et al. found that epidemiologic HIV risk scores were positively associated with PrEP interest, and that high numbers of AGYW both above and below the high-risk cut-off were very interested in PrEP (68% vs. 63%).<sup>38</sup>

#### Mobile

A South African study found that integrating PrEP with SRHS and delivering it via an adolescent-friendly mobile clinic led to an increase in both PrEP initiation and contraception. AGYW who were using contraception were significantly more likely to initiate PrEP (76%) on the same-day compared to those who were not using contraception and declined PrEP (66%) ( $p=0.001$ ). Contraception was initiated by 44% of AGYW on the same-day as PrEP initiation compared to 30% who declined PrEP ( $p=0.003$ ).<sup>29</sup> No qualitative evidence on the acceptability and feasibility of mobile delivery models were identified.

#### **Overall perceptions of SDMs by AGYW**

1  
2  
3 In a study conducted in Malawi, Maseko et al found high levels of hypothetical PrEP  
4 acceptability among AGYW who reported that interest in PrEP depends on confidential access  
5 and discrete packaging (cartons or bottles that resemble treatment for common ailments) of  
6 the drug. Moreover, AGYW reported that youth-friendly delivery modalities such as schools  
7 and youth-friendly sections of health centres that provide *"...a place for the youths to be*  
8 *comfortable getting these drugs..."* may facilitate the initiation of PrEP as a prevention  
9 strategy.<sup>39</sup>  
10  
11  
12  
13

#### 14 **PrEP SDMs for men**

15 We found one mixed method study among young South African men. PrEP was not provided,  
16 but hypothetical perceptions, barriers and enablers of PrEP initiation were assessed. Whilst  
17 only 11% of men were aware of PrEP, 62% reported that they were very likely to take it. The  
18 young men preferred to keep PrEP use a secret from their partners, friends, and family. PrEP  
19 initiation was also dependent on the SDM used. Receiving PrEP from the clinic was reported  
20 as a barrier to PrEP usage as this could incite community stigma. Young men reported that  
21 *"...they (community) would immediately think that you are HIV positive already, not that you*  
22 *are taking the prevention one..."*  
23  
24  
25  
26  
27  
28

#### 29 **PrEP SDMs for AGYW and men**

30 We found 19 studies that assessed various SDMs for linkages to PrEP for AGYW and men.  
31 Amongst AGYW and men, PrEP SDMs included hybrid (research site-healthcare facility or  
32 community-healthcare facility, n=8), community (n=5) and research site (n=6). These studies  
33 either recruited serodiscordant couples or included AGYW and men as individual participants.  
34  
35  
36  
37

#### 38 Hybrid

39 We identified seven studies that used a hybrid model to deliver PrEP.<sup>40-46</sup>  
40  
41

42 One study from Kenya and Uganda by Heffron et al. involved a hybrid (research site- health  
43 facility) model that integrated PrEP delivery into antiretroviral therapy (ART) treatment  
44 services for high-risk HIV serodiscordant couples.<sup>40</sup> The intervention was mainly couples-  
45 based and involved HIV prevention counselling; safer conception counselling or  
46 contraceptives; counselling and HIV testing for HIV-negative partner; PrEP  
47 initiation/prescription; and referral to a local health facility for the HIV infected partner for  
48 ART. The results showed high uptake of integrated PrEP and ART with an estimated 96%  
49 reduction in HIV incidence (82.9% of couples used PrEP or ART and there were no HIV  
50 seroconversions, 14.5% used some ART and/or PrEP and 2.6% used neither PrEP nor ART).<sup>40</sup>  
51  
52  
53  
54  
55

56 Qualitative evidence that explored HIV serodiscordant couple's decision-making and  
57 motivations to initiate PrEP through this integrated ART-PrEP approach showed that a positive  
58 clinical encounter with a healthcare provider and client-friendly services played a critical role  
59 in the couple's decisions to initiate and continue PrEP.<sup>45</sup> Clear messaging, in-depth  
60

1  
2  
3 counselling and friendly, non-judgmental/stigmatizing services provided by healthcare  
4 workers empowered, reassured and promoted PrEP initiation among HIV serodiscordant  
5 couples with some describing it as “*service beyond the medicine*’.<sup>45</sup> Furthermore, being at a  
6 place where service is offered to both couple (ART for the HIV positive partner and PrEP for  
7 the HIV-negative partner) motivated their decision.<sup>45</sup>  
8  
9

10  
11 Five studies used a hybrid mobile testing approach implemented at community health fairs,  
12 home, or local health facility.<sup>26 41-44</sup> Two studies from Kenya and Uganda showed that PrEP  
13 initiation was high (>75%) among individuals who received HIV testing on the same-day.<sup>41 43</sup>  
14 Mayer et al. found that 39% of participants initiated PrEP within 4 weeks of the community  
15 health campaign.<sup>42</sup> However, the distance between the participants and the healthcare  
16 provider influenced PrEP initiation.  
17  
18  
19

20  
21 Koss et al. and Camlin et al. who explored barriers influencing PrEP initiation using the hybrid  
22 (community-health facility) model,<sup>26 44</sup> found that PrEP initiation was hindered by HIV/ART-  
23 related stigma which emanated from the colour of the pill being the same as HIV treatment  
24 regimens, and access of PrEP services at the same facility where HIV care is provided.<sup>44</sup> Men  
25 reported that the “... *majority of us fear to go to the health center...*” and suggested  
26 alternatives such as designating a clinic day for PrEP or “...*distribute [PrEP] to the people...*”.  
27 Participants reported that healthcare workers should deliver PrEP or find delivery methods  
28 that are easily accessible by the community “...*just like they did with condoms.*” Young adults  
29 who attended school outside the community could not initiate PrEP given that PrEP was only  
30 provided within study communities. Furthermore, school attendance made initiating and  
31 continuing PrEP challenging.<sup>26 44</sup>  
32  
33  
34  
35  
36  
37

### 38 Community

39 Two South African studies conducted in a community setting explored the hypothetical  
40 opinions of PrEP among salon owners, stylists, and clients.<sup>47 48</sup> Ninety-five percent of owners  
41 and stylists and 77% of clients were comfortable with PrEP being offered at hair salons,<sup>48</sup>  
42 which provide a geographically convenient and conducive environment for receiving health  
43 services.<sup>47 48</sup> A third community-based study which used a 90-second PrEP demand creation  
44 video and informational brochures, found that 68% and 56% of young women respectively  
45 reported that they were definitely interested in learning more about and initiating PrEP. The  
46 study also found that young women preferred realistic visuals that they could identify with,  
47 rather than highly stylized models. Data evaluated by Lubwama et al. showed that 69.2% of  
48 key populations which included AGYW and serodiscordant couples were reached through  
49 drop-in centres and community-based outreach centres providing PrEP versus fixed public  
50 health facilities.<sup>49</sup> The proportion that returned for PrEP was higher among serodiscordant  
51 couples (3 months: 56.9%, 6 months: 46.8%) compared to sex workers (3 months: 37.5%, 6  
52 months: 26.3%).  
53  
54  
55  
56  
57  
58  
59  
60

### Clinical Research Site

In three of the six studies conducted at a clinical research site,<sup>27 40 50-54</sup> PrEP was integrated with ART or with ART and other interventions such as VMMC.<sup>40 51 52</sup> Across the three studies, ≥95% of the HIV-negative partner within serodiscordant couples initiated PrEP. The use of PrEP in combination with ART or other prevention interventions (VMMC) or conception strategies resulted in reduced HIV incidence. Serodiscordant couples found that the “couples-focused” services provided through the integrated PrEP-ART strategy strengthened their relationships.

### **Overall perceptions of SDMs by AGYW and men**

Several studies explored factors that influence PrEP initiation, non-initiation and discontinuation in individuals who received PrEP through the different SDMs.<sup>26 27 44-46 54</sup> Motivators to initiate PrEP included: perception of high-risk, preference of PrEP over other HIV prevention methods, protection from unwanted/forced sexual encounters, love for one's partner, knowledge about PrEP and the belief it is effective, partner support belief that PrEP supported life goals and a positive clinical encounter.<sup>26 27 44-46 54 55</sup> Females preferred a product that was delivered at a health clinic over accessing it at a pharmacy.<sup>56</sup> Barriers to PrEP initiation included daily pill burden, side effects, mixed dosing messaging, living with parents or attending school, partners consent or partners reaction to use and HIV-related stigma.<sup>26 27 44-46 54 55</sup>

### **Other models**

We identified four other studies that explored other methods of promoting PrEP initiation among AGYW and men.<sup>57-60</sup> Jani et al. explored male partners support for hypothetical PrEP use by AGYW.<sup>59</sup> Male partners highlighted that their support would be contingent on their early involvement in the decision-making process regarding PrEP which would alleviate suspicion of infidelity. AGYW suggested that not including male partners may result in social harms (partner violence, dissolution of relationships). Strategies recommended by male partners included couples counselling, educating, and providing PrEP to men and community sensitization. Makyao et al. explored parental support of AGYW's hypothetical use of PrEP. Parents supported PrEP availability acknowledging the risks faced by AGYW.<sup>60</sup> However, support was also influenced by social norms (promoting promiscuity or condoning sexual activity). Differential parenting roles influenced the type of support: mothers suggested providing a conducive environment (good diet) for PrEP use whilst fathers suggested providing operational support (transport money). Cremin et al. and Irungu et al. reported that providing time-limited PrEP during periods of increased exposure would be a novel, efficient and cost-effective strategy for providing PrEP.<sup>57 58</sup>

## Discussion

The purpose of this review was to synthesize and appraise the effects on PrEP initiation and the acceptability and feasibility of PrEP SDMs designed to promote linkage to care among AGYW and men eligible for PrEP in SSA. Given the challenging interactions between AGYW and men and the health system, we reviewed evidence of PrEP initiation in a range of SDMs i.e., health facility-, mobile-, community- based or hybrid models, and we explored the perceptions, barriers, and facilitators of these models. This scoping review identified 27 primary studies and 10 conference abstracts.

Delivery of PrEP to AGYW included HF-B models which integrated PrEP into routine FP/MCH/SRH/ANC services, hybrid models which allowed AGYW to initiate PrEP either at community-based venues or private or public facilities and mobile models. Whereas integrated models provided at a public health facility offer a potential “one-stop” location for AGYW to initiate PrEP whilst accessing other services, the additional time spent on PrEP-related activities may deter AGYW from initiation. Integrated delivery of PrEP provides an opportunity to respond to potential syndemics in AGYW who are eligible for PrEP; however, we found mixed results regarding the effectiveness of integrated models on PrEP initiation. Two studies in which PrEP was initiated in an FP or MCH clinic showed PrEP initiation of <50% with initiation being higher in women >24 years.<sup>31 32</sup> A third multi-country study which integrated PrEP with SRHS at FP clinics showed 90% PrEP initiation.<sup>30</sup> These studies were primarily implementation studies without a comparator, and PrEP related activities were provided by a PrEP-dedicated nurse. This task-shifting strategy removed this additional service from the workload of already overburdened routine nurses; however, the feasibility of this approach requires further evaluation considering the human resources challenges in SSA. Integration of HIV services and other health services has shown to be a useful strategy to improve linkage to HIV care, ART initiation and viral suppression. The most common forms of integration were (i) HIV testing and counselling added to non-HIV services and (ii) non-HIV services added to antiretroviral therapy (ART). The most commonly integrated non-HIV services were maternal and child healthcare, tuberculosis testing and treatment, primary healthcare, family planning, and sexual and reproductive health services.<sup>61</sup>

Adolescent-friendly clinics or adolescent-friendly sections within health facilities were also shown to promote initiation of PrEP.<sup>29 30 39</sup> However, a New York study of adolescents' PrEP awareness showed that 86% of adolescents eligible for PrEP reported never being informed about PrEP by their healthcare professionals.<sup>62</sup> Taggart et al. found that provider attitudes and recommendations within a healthcare facility influence adolescents' willingness or unwillingness to use PrEP.<sup>63</sup> Our results show that AGYW favour community-based youth-friendly delivery modalities of PrEP such as DICEs or schools over delivery via public and private health facilities. These findings concur with other studies which have shown that factors that influence US women's decision-making about the use of PrEP include the ease of

1  
2  
3 accessing services and medication close to their homes.<sup>64 65</sup> Moreover, women highlighted  
4 the importance of community peers in influencing their decisions to initiate PrEP.<sup>65</sup>  
5  
6

7 We identified only one study among young, heterosexual men that explored the hypothetical  
8 perceptions of PrEP initiation. Men reported that if PrEP was available, they would use it.  
9 However, initiation was dependent on SDM and a HF-B model was not favoured due to  
10 community stigma.<sup>25</sup> Heterosexual men are not classified as a key or vulnerable population in  
11 the HIV prevention response, as such research that focuses on PrEP initiation or SDMs among  
12 heterosexual men is limited. Increasing the engagement of men with health services requires  
13 an understanding of the structural barriers that limit their access and requires targeted and  
14 adaptive interventions to meet the needs of men. Differentiated service delivery models (for  
15 example facility-based and/or community-based adherence clubs and quick pharmacy pick-  
16 up) has been shown to improve uptake and retention of men in HIV treatment services.<sup>66</sup>  
17  
18  
19  
20  
21

22 In studies that targeted both women (including AGYW) and men, SDMs included a hybrid  
23 approach (research site-community or community-health facility), community-based models  
24 and those based at research sites. PrEP delivery to serodiscordant couples involved integrated  
25 models such as delivery of PrEP and ART to serodiscordant couples allows both partners to  
26 interact with the health system. In such models, PrEP is initiated and continued only until the  
27 HIV infected partner achieves viral suppression which may be a cost-effective approach if viral  
28 suppression is achieved timeously.<sup>40</sup> However, in a sub-Saharan setting where <65% of people  
29 living with HIV have suppressed viral load (VL) (<1000 copies/mL) and there are health  
30 systems challenges with VL testing and turn-around-time, integrated delivery of PrEP and ART  
31 may not be feasible.<sup>1 67</sup> Our findings have shown that community-based models which involve  
32 same-day HIV testing and PrEP initiation are favourable especially among men.<sup>43</sup>  
33 Furthermore, the delivery of PrEP through innovative community-based venues such as hair  
34 salons which provided a comfortable and familiar environment yielded high interest in PrEP  
35 initiation.<sup>47</sup> Many participants reported the convenience of pharmacies located close to public  
36 transport routes, as many did not have access to cars or did not want to bear the cost of fuel  
37 incurred travelling to the clinic.<sup>68</sup>  
38  
39  
40  
41  
42  
43

44 Both AGYW, men and serodiscordant couples have expressed that PrEP initiation is influenced  
45 by the setting i.e., a friendly environment and by the attitude of healthcare workers i.e., non-  
46 judgmental/non-stigmatizing.<sup>30 45</sup> This suggests that the successful delivery of PrEP to AGYW  
47 or men using HF-B models either through integrated or standalone approaches requires  
48 healthcare workers to play an essential role.<sup>69 70</sup> Structural barriers to PrEP initiation included:  
49 the distance to travel to and time spent at health facilities. To address these barriers, there  
50 is an increasing need for differentiated SDMs that provide alternative access options  
51 especially considering that PrEP is a prevention intervention delivered to individuals who are  
52 generally of good health and who may be disinclined to travel long distances and wait in long  
53 queues to access PrEP.<sup>71</sup>  
54  
55  
56  
57  
58

59 *Policy and programme recommendations and future research areas*  
60

1  
2  
3 Notably, literature on PrEP SDMs for AGYW and more especially heterosexual men is limited  
4 thus calling for more research in these areas. In order to increase PrEP initiation, country  
5 programme implementers need to understand which SDM/s work for AGYW or men and to  
6 adapt these to best suit the unique needs of the users.<sup>72</sup> Opportunities exist for integrated  
7 strategies of PrEP delivery at a health facility or mobile clinic. However, we need to  
8 understand which integrated strategy (e.g., integration with ART, SRHS, or contraceptive  
9 services) is most acceptable and scalable for AGYW and men. Further research is needed  
10 among couples where one partner is on PrEP, to understand if the perception of risk changes  
11 in the partner who is not on PrEP. We identified only one conference abstract that targeted  
12 PrEP SDM among heterosexual men. This study was also limited as PrEP was not provided,  
13 but hypothetical perceptions of PrEP were assessed. This dearth of published literature  
14 highlights a major gap in the knowledge with considerably more research needed to  
15 investigate SDMs among men. Training and retraining of healthcare workers on PrEP  
16 guidelines is essential to equip them with the skills to ensure that PrEP is delivered in a friendly  
17 and safe space by non-stigmatizing healthcare workers. To mitigate the time burden and  
18 travel expenses incurred by AGYW and men, same-day initiation of PrEP to those eligible and  
19 multi-months dispensing of refills should be considered.<sup>11 71 73</sup>

26  
27 Furthermore, task-shifting among healthcare workers along the PrEP cascade will avoid  
28 additional burden on the health system. Further studies are required to evaluate the  
29 feasibility of PrEP-dedicated nurses. Differentiated SDMs are needed to take PrEP to where  
30 users live, socialise and work.<sup>11</sup> These models include home deliveries, pharmacies, DICES,  
31 salons, mobile clinics and tele-medicine-assisted models in both the public and private health  
32 sectors. Mobile clinics near schools could be successful but need to be regular, reliable, and  
33 sustainable. Furthermore, considering that eligibility for continuation on PrEP requires repeat  
34 HIV testing, there is a need for interventions (e.g., HIV self-testing) to address this challenge  
35 when PrEP is delivered at non- HF-B settings.

### 40 Limitations

41 The strengths of this review include the inclusion of multiple databases across disciplines and  
42 broad inclusion criteria. We also used a comprehensive search strategy that followed the JBI  
43 reviewer's manual and structured using PRISMA-ScR guidelines, and robust methods that  
44 included double data screening, extraction, and review. Another strength is that we included  
45 grey literature and unpublished reports which minimizes the chances of missing studies with  
46 negative or null findings. Limitations include the exclusion of studies conducted in non-SSA  
47 and that were published in non-English languages. In addition, due to a lag in adding and  
48 indexing articles in various online databases, our review could fail to locate the most recent  
49 publications and research on SDMs for PrEP initiation. Another limitation was that most of  
50 the included studies were from 3 countries (Kenya, Uganda, and South Africa) hence the  
51 generalisability of the results to SSA might be limited. Furthermore, there were limitations in  
52 the sources of evidence as many of the studies evaluated the hypothetical perceptions of PrEP  
53 initiation and some of the feasibility and acceptability is theoretical which may not translate  
54 to actual realities. Due to the dearth of literature on SDMs among AGYW and men and  
55  
56  
57  
58  
59  
60

1  
2  
3 considering that PrEP roll out in this population in many SSA countries has only recently been  
4 maximised, we included research studies to understand the SDMs in this setting. Although  
5 the recruitment criteria in a research setting may have resulted in a higher initiation of PrEP,  
6 the lessons learnt from this setting could contribute to improving the roll out of PrEP in AGYW  
7 and men. Critical appraisal of evidence from conference abstracts was limited by the  
8 information provided in the abstract. As such, many items for conference abstracts on the  
9 CASP tool were adjudicated as can't tell or unclear risk.  
10  
11  
12  
13

### 14 **Conclusions**

15 We conducted a scoping review on PrEP SDMs, summarising evidence on PrEP initiation using  
16 existing models among AGYW and men and explored the users' perceptions, and barriers and  
17 facilitators of these models. These models were mostly found to be hybrid approaches  
18 (research site-health facility or community-health facility), community-based or based at a  
19 research site. Community-based models at convenient locations were favoured by both  
20 AGYW and men. Integrated strategies delivered at friendly health facilities by non-  
21 stigmatising healthcare providers was also a preferred PrEP delivery channel. The successful  
22 initiation of PrEP by AGYW and men will be dependent on the service setting where it is  
23 offered and cannot be considered as a one size fits all approach. Care must be taken to find  
24 the delivery method best suited to each sub-population. Future research should focus on  
25 what differentiated SDMs work for AGYW and heterosexual men to identify which approach  
26 is most successful in improving PrEP initiation and to understand their individual needs when  
27 using these models.  
28  
29  
30  
31  
32  
33

### 34 **Funding**

35 This work was supported by the U.S. President's Emergency Plan for AIDS Relief (PEPFAR)  
36 through the Centers for Disease Control and Prevention, under the terms of Cooperative  
37 Agreement Number 1 NU2GGH002193-01-00.  
38  
39  
40  
41  
42

### 43 **Disclaimer**

44 The findings and conclusions in this manuscript are those of the authors and do not  
45 necessarily represent the official position of the US Centers for Disease Control and  
46 Prevention.  
47  
48  
49  
50

### 51 **Author Contributions:**

52 All authors contributed to conceptualising and designing the study. WC and TR conducted the  
53 literature search. WC, TR, KJ, NJ, DG independently performed screening. WC, TR, CM, EN, ET,  
54 MH, TMA, NJ, DG, BZ, WB and FM independently performed data extraction. EN developed  
55 the data charting form on REDCap. WC and TR performed initial data synthesis and  
56 interpretation and all authors refined it. WC and TR drafted the manuscript. All authors  
57 contributed to writing and reviewing the manuscript.  
58  
59  
60



1  
2  
3  
4  
5 **Competing Interests:** None declared

6  
7 **Patient consent for publication:** Not required

8  
9 **Data availability statement:** All data relevant to the study are included in the article or  
10 uploaded as supplementary information.

11  
12 **Ethics Approval:** The scoping review focuses on published research in the public domain  
13 therefore no ethics approval is required.  
14  
15  
16  
17  
18  
19  
20  
21  
22  
23  
24  
25  
26  
27  
28  
29  
30  
31  
32  
33  
34  
35  
36  
37  
38  
39  
40  
41  
42  
43  
44  
45  
46  
47  
48  
49  
50  
51  
52  
53  
54  
55  
56  
57  
58  
59  
60

For peer review only

## References

1. UNAIDS. AIDSinfo 2020 [cited 2020 21 April]. Available from: <https://aidsinfo.unaids.org/> accessed 21 April 2020.
2. UNAIDS. We've got the power: Women, Adolescent girls and the HIV response 2019 [cited 2020 21 April]. Available from: [https://www.unaids.org/sites/default/files/media\\_asset/2020\\_women-adolescent-girls-and-hiv\\_en.pdf](https://www.unaids.org/sites/default/files/media_asset/2020_women-adolescent-girls-and-hiv_en.pdf) accessed 21 April 2020.
3. Pascoe L, Peacock D, Stemple L. Reaching men: addressing the blind spot in the HIV response. *Int J Mens Soc Comm Health* 2018;1(SP1):e57-e70.
4. Colvin CJ. Strategies for engaging men in HIV services. *Lancet HIV* 2019
5. UNAIDS. HIV prevention 2020 road map. Geneva: Joint United Nations Programme on HIV2017 [cited 2020 21 April]. Available from: [https://www.unaids.org/sites/default/files/media\\_asset/hiv-prevention-2020-road-map\\_en.pdf](https://www.unaids.org/sites/default/files/media_asset/hiv-prevention-2020-road-map_en.pdf) accessed 21 April 2020.
6. World Health Organization. Guidance on Pre-exposure oral prophylaxis (PrEP) for serodiscordant couples, men who have sex with men and transgender women at high risk of HIV. Geneva: World Health Organization, 2012.
7. World Health Organization. Consolidated guidelines on the use of antiretroviral drugs for treating and preventing HIV infection: recommendations for a public health approach. Geneva Switzerland: World Health Organization 2016.
8. Dunbar MS, Kripke K, Haberer J, et al. Understanding and measuring uptake and coverage of oral pre-exposure prophylaxis delivery among adolescent girls and young women in sub-Saharan Africa. *Sex Health* 2018;15(6):513-21.
9. Ajayi AI, Mudefi E, Yusuf MS, et al. Low awareness and use of pre-exposure prophylaxis among adolescents and young adults in high HIV and sexual violence prevalence settings. *Medicine* 2019;98(43)
10. Department of Health South Africa. Guidelines for Expanding Combination Prevention and Treatment Options: Oral Pre-Exposure Prophylaxis (PrEP) and Test and Treat (T&T), 2017.
11. O'Malley G, Barnabee G, Mugwanya K. Scaling-up PrEP Delivery in Sub-Saharan Africa: What Can We Learn from the Scale-up of ART? *Curr HIV/AIDS Rep* 2019;16(2):141-50.
12. Venter WD. Pre-exposure prophylaxis: the delivery challenge. *Front Public Health* 2018;6:188.
13. Arksey H, O'Malley L. Scoping studies: towards a methodological framework. *Int J Soc Res Methodol* 2005;8(1):19-32.
14. Mays N, Roberts E, Popay J. Synthesising research evidence 2001.
15. Aromataris E, Munn Z, (Editors). Joanna Briggs Institute Reviewer's Manual: The Joanna Briggs Institute, 2017.
16. Tricco AC, Lillie E, Zarin W, et al. PRISMA extension for scoping reviews (PRISMA-ScR): checklist and explanation. *Ann Intern Med* 2018;169(7):467-73.
17. World Bank. Sub-Saharan Africa 2019 [cited 2019 25 November]. Available from: <https://data.worldbank.org/region/sub-saharan-africa> accessed 25 November 2019.
18. EndNote [program]. EndNote X7 version. Philadelphia, PA: Clarivate, 2013.
19. Ouzzani M, Hammady H, Fedorowicz Z, et al. Rayyan—a web and mobile app for systematic reviews. *Systematic reviews* 2016;5(1):1-10.

- 1
  - 2
  - 3
  - 4
  - 5
  - 6
  - 7
  - 8
  - 9
  - 10
  - 11
  - 12
  - 13
  - 14
  - 15
  - 16
  - 17
  - 18
  - 19
  - 20
  - 21
  - 22
  - 23
  - 24
  - 25
  - 26
  - 27
  - 28
  - 29
  - 30
  - 31
  - 32
  - 33
  - 34
  - 35
  - 36
  - 37
  - 38
  - 39
  - 40
  - 41
  - 42
  - 43
  - 44
  - 45
  - 46
  - 47
  - 48
  - 49
  - 50
  - 51
  - 52
  - 53
  - 54
  - 55
  - 56
  - 57
  - 58
  - 59
  - 60
20. Harris PA, Taylor R, Thielke R, et al. Research electronic data capture (REDCap)—a metadata-driven methodology and workflow process for providing translational research informatics support. *J Biomed Inform* 2009;42(2):377-81.
21. Cochrane Effective Practice and Organisation of Care (EPOC). Suggested risk of bias criteria for EPOC reviews. EPOC Resources for review authors 2017 [cited 2020 01 April]. Available from: <https://protect-za.mimecast.com/s/vgZ1C8qzwAFjg8EMlndz5c> accessed 01 April 2020.
22. Critical Appraisal Skills Programme. Qualitative Checklist 2018 [cited 2020 01 April]. Available from: <https://casp-uk.net/casp-tools-checklists/> accessed 01 April 2020.
23. Lewin S, Langlois E, Tuncalp Ö, et al. WEIRD (Ways of Evaluating Important and Relevant Data) tool: Questions to guide assessment / critical appraisal of programme descriptions, implementation descriptions and other mainly descriptive types of evidence Oslo: Norwegian Institute of Public Health 2019 [cited 2020 01 April]. Available from: [https://epoc.cochrane.org/sites/epoc.cochrane.org/files/public/uploads/Resources-for-authors2017/weird\\_tool.pdf](https://epoc.cochrane.org/sites/epoc.cochrane.org/files/public/uploads/Resources-for-authors2017/weird_tool.pdf) accessed 01 April 2020.
24. Moher D, Liberati A, Tetzlaff J, et al. Preferred Reporting Items for Systematic Reviews and Meta-Analyses: The PRISMA Statement. *PLoS Med* 2009;6(7):e1000097. doi: 10.1371/journal.pmed.1000097
25. Bell J, Sharma S, Hasen N, et al. Awareness of PrEP and drivers and barriers to use among men aged 20-34 in Mpumalanga and KwaZulu-Natal, South Africa [abstract]. IAS 2019. Mexico City, Mexico, 2019.
26. Koss CA, Ayieko J, Owaraganise A, et al. Survey of Early Barriers to PrEP Uptake among Clients and Community Members in the SEARCH Study in Rural Kenya and Uganda [abstract]. IAS 2017. Paris, France, 2017.
27. Atujuna M, Newman PA, Wallace M, et al. Contexts of vulnerability and the acceptability of new biomedical HIV prevention technologies among key populations in South Africa: A qualitative study. *PLoS One* 2018;13(2):e0191251. doi: <https://doi.org/10.1371/journal.pone.0191251>
28. Ong'wen P, Musau A, D W, et al. Adolescent girls on PrEP: Findings from Kenya's oral PrEP scale-up supported by Jilinde [abstract]. IAS 2019. Mexico City, Mexico, 2019.
29. Rousseau E, Baeten J, Morton J, et al. Association between contraceptive use and PrEP uptake and continuation in adolescent girls and young women in Cape Town, South Africa [abstract]. IAS 2019. Mexico City, Mexico, 2019.
30. Travill D, Bekker L, Delany-Moretlwe S, et al. Sexual behavior and PrEP uptake among young African women in a demonstration project about PrEP delivery [abstract]. AIDS 2018. Amsterdam, Netherlands, 2018.
31. Mugwanya KK, Pintye J, Kinuthia J, et al. Integrating preexposure prophylaxis delivery in routine family planning clinics: A feasibility programmatic evaluation in Kenya. *PLoS Med* 2019;16(9) doi: <https://doi.org/10.1371/journal.pmed.1002885>
32. Kinuthia J, Pintye J, Abuna F, et al. Pre-exposure prophylaxis uptake and early continuation among pregnant and post-partum women within maternal and child health clinics in Kenya: results from an implementation programme. *Lancet HIV* 2020;7(1):E38-E48. doi: [https://doi.org/10.1016/S2352-3018\(19\)30335-2](https://doi.org/10.1016/S2352-3018(19)30335-2)
33. Pintye J, Kinuthia J, Allen Roberts D, et al. Integration of PrEP services into routine antenatal and postnatal care: Experiences from an implementation program in western Kenya. *J Acquir Immune Defic Syndr* 2018;79(5):590-95.

- 1  
2  
3  
4  
5  
6  
7  
8  
9  
10  
11  
12  
13  
14  
15  
16  
17  
18  
19  
20  
21  
22  
23  
24  
25  
26  
27  
28  
29  
30  
31  
32  
33  
34  
35  
36  
37  
38  
39  
40  
41  
42  
43  
44  
45  
46  
47  
48  
49  
50  
51  
52  
53  
54  
55  
56  
57  
58  
59  
60
34. Ngure K, Velloza J, Patel RC, et al. Alignment of PrEP use and effective contraceptive use among East African women in HIV serodiscordant partnerships. *International Journal of STD and AIDS* 2020;31(13):1263-71. doi: 10.1177/0956462420951501
  35. Were D, Musau A, Mutegi J, et al. Using a HIV prevention cascade for identifying missed opportunities in PrEP delivery in Kenya: results from a programmatic surveillance study. *J Int AIDS Soc* 2020;23:e25537.
  36. Delany-Moretlwe S, Chersich M, Harvey S, et al. Empowerment clubs did not increase PrEP continuation among adolescent girls and young women in South Africa and Tanzania - Results from the EMPOWER randomised trial [abstract]. AIDS 2018. Amsterdam, Netherlands, 2018.
  37. Donnell D, Beesham I, Welch JD, et al. Incorporating oral PrEP into standard prevention services for South African women: a nested interrupted time-series study. *Arch Sex Behav* 2021 doi: 10.1007/s10508-020-01880-y  
10.1016/s2352-3018(21)00048-5 [published Online First: 2021/05/07]
  38. Hill LM, Maseko B, Chagomerana M, et al. HIV risk, risk perception, and PrEP interest among adolescent girls and young women in Lilongwe, Malawi: operationalizing the PrEP cascade. *J Int AIDS Soc* 2020;23:e25502.
  39. Maseko B, Hill LM, Phanga T, et al. Perceptions of and interest in HIV pre-exposure prophylaxis use among adolescent girls and young women in Lilongwe, Malawi. *PLoS One* 2020;15(1):e0226062. doi: <https://doi.org/10.1371/journal.pone.0226062>
  40. Heffron R, Ngure K, Odoyo J, et al. Pre-exposure prophylaxis for HIV-negative persons with partners living with HIV: uptake, use, and effectiveness in an open-label demonstration project in East Africa. *Gates Open Res* 2018;1:3. doi: <https://dx.doi.org/10.12688%2Fgatesopenres.12752.2>
  41. Koss CA, Ayieko J, Mwangwa F, et al. Early Adopters of Human Immunodeficiency Virus Preexposure Prophylaxis in a Population-based Combination Prevention Study in Rural Kenya and Uganda. *Clin Infect Dis* 2018;67(12):1853-60. doi: <https://doi.org/10.1093/cid/ciy390>
  42. Mayer CM, Owaraganise A, Kabami J, et al. Distance to clinic is a barrier to PrEP uptake and visit attendance in a community in rural Uganda. *J Int AIDS Soc* 2019;22(4):e25276.
  43. Koss CA, Charlebois ED, Ayieko J, et al. Uptake, engagement, and adherence to pre-exposure prophylaxis offered after population HIV testing in rural Kenya and Uganda: 72-week interim analysis of observational data from the SEARCH study. *Lancet HIV* 2020
  44. Camlin CS, Koss CA, Getahun M, et al. Understanding Demand for PrEP and Early Experiences of PrEP Use Among Young Adults in Rural Kenya and Uganda: A Qualitative Study. *AIDS Behav* 2020
  45. Ngure K, Heffron R, Curran K, et al. I Knew I Would Be Safer. Experiences of Kenyan HIV Serodiscordant Couples Soon After Pre-Exposure Prophylaxis (PrEP) Initiation. *AIDS Patient Care STDS* 2016;30(2):78-83.
  46. Gombe M, Cakouros B, Ncube G, et al. Key barriers and enablers associated with uptake and continuation of oral pre-exposure prophylaxis (PrEP) in the public sector in Zimbabwe: Qualitative perspectives of general population clients at high risk for HIV. *PLoS One* 2020;15(1) doi: <https://doi.org/10.1371/journal.pone.0227632>

- 1
- 2
- 3
- 4 47. Bassett IV, Govere S, Millham L, et al. Contraception, HIV Services, and PrEP in South
- 5 African Hair Salons: A Qualitative Study of Owner, Stylist, and Client Perspectives. *J*
- 6 *Community Health* 2019;44(6):1150-59.
- 7 48. Bassett IV, Xu A, Govere S, et al. Contraception and PrEP in South African Hair Salons:
- 8 Owner, Stylist, and Client Views. *J Acquir Immune Defic Syndr* 2018;79(2):E78-E81.
- 9 doi: <https://dx.doi.org/10.1097%2FQAI.0000000000001794>
- 10 49. Lubwama J, Alamo S, Ajulong C, et al. Preexposure Prophylaxis for Key Populations In
- 11 Uganda: Early Scale-Up Lessons [abstract]. CROI 2019. Seattle, Washington, 2019.
- 12 50. Baeten JM, Heffron R, Kidoguchi L, et al. Integrated Delivery of Antiretroviral Treatment
- 13 and Pre-exposure Prophylaxis to HIV-1-Serodiscordant Couples: A Prospective
- 14 Implementation Study in Kenya and Uganda. *PLoS Med* 2016;13(8) doi:
- 15 <https://dx.doi.org/10.1371%2Fjournal.pmed.1002099>
- 16 51. Heffron R, Ngunjiri K, Vellozo J, et al. Implementation of a comprehensive safer conception
- 17 intervention for HIV-serodiscordant couples in Kenya: uptake, use and effectiveness.
- 18 *J Int AIDS Soc* 2019;22(4) doi: <https://doi.org/10.1002/jia2.25261>
- 19 52. Heffron R, Thomson K, Celum C, et al. Fertility Intentions, Pregnancy, and Use of PrEP
- 20 and ART for Safer Conception Among East African HIV Serodiscordant Couples. *AIDS*
- 21 *Behav* 2018;22(6):1758-65.
- 22 53. Morton JF, Myers L, Gill K, et al. Evaluation of a behavior-centered design strategy for
- 23 creating demand for oral PrEP among young women in Cape Town, South Africa.
- 24 *Gates Open Res* 2020;4
- 25 54. Ware NC, Pisarski EE, Nakku-Joloba E, et al. Integrated delivery of antiretroviral
- 26 treatment and pre-exposure prophylaxis to HIV-1 serodiscordant couples in East
- 27 Africa: a qualitative evaluation study in Uganda. *J Int AIDS Soc* 2018;21(5):e25113.
- 28 55. Sack DE, De Schacht C, Paulo P, et al. Pre-exposure prophylaxis use among HIV
- 29 serodiscordant couples: a qualitative study in Mozambique. *Global Health Action*
- 30 2021;14(1) doi: 10.1080/16549716.2021.1940764
- 31 56. Minnis AM, Atujuna M, Browne EN, et al. Preferences for long-acting Pre-Exposure
- 32 Prophylaxis (PrEP) for HIV prevention among South African youth: results of a
- 33 discrete choice experiment. *J Int AIDS Soc* 2020;23(6):e25528.
- 34 57. Cremin I, Morales F, Jewell BL, et al. Seasonal PrEP for partners of migrant miners in
- 35 southern Mozambique: a highly focused PrEP intervention. *J Int AIDS Soc*
- 36 2015;18(4):19946.
- 37 58. Irungu EM, Sharma M, Maronga C, et al. The Incremental Cost of Delivering PrEP as a
- 38 Bridge to ART for HIV Serodiscordant Couples in Public HIV Care Clinics in Kenya.
- 39 *AIDS Res Treat* 2019;2019 doi: <https://doi.org/10.1155/2019/4170615>
- 40 59. Jani N, Pilgrim N, Saria V, et al. Will male partners of adolescent girls and young women
- 41 (AGYW) support their PrEP use? A comparative analysis of AGYW and male partners
- 42 of AGYW views in Tanzania [abstract]. AIDS 2018. Amsterdam, Netherlands, 2018.
- 43 60. Makyao N, Saria V, Jani N, et al. How will social norms about parenting influence
- 44 parental support of adolescent girls and young women's (AGYW) use of PrEP?
- 45 Perspectives from parents in Tanzania [abstract]. AIDS 2018. Amsterdam,
- 46 Netherlands, 2018.
- 47 61. Bulstra CA, Hontelez JA, Otto M, et al. Integrating HIV services and other health services:
- 48 A systematic review and meta-analysis. *PLoS medicine* 2021;18(11):e1003836.
- 49
- 50
- 51
- 52
- 53
- 54
- 55
- 56
- 57
- 58
- 59
- 60

- 1
- 2
- 3
- 4 62. 1288. Adolescents' Knowledge and Acceptance of Pre-exposure Prophylaxis (PrEP) in the
- 5 Capital District Region of New York. *Open Forum Infect Dis*; 2018. Oxford University
- 6 Press.
- 7 63. Taggart T, Liang Y, Pina P, et al. Awareness of and willingness to use PrEP among Black
- 8 and Latinx adolescents residing in higher prevalence areas in the United States. *PLoS*
- 9 *One* 2020;15(7):e0234821.
- 10 64. Aaron E, Blum C, Seidman D, et al. Optimizing delivery of HIV preexposure prophylaxis
- 11 for women in the United States. *AIDS Patient Care STDs* 2018;32(1):16-23.
- 12 65. Auerbach JD, Kinsky S, Brown G, et al. Knowledge, attitudes, and likelihood of pre-
- 13 exposure prophylaxis (PrEP) use among US women at risk of acquiring HIV. *AIDS*
- 14 *Patient Care STDs* 2015;29(2):102-10.
- 15 66. Mukumbang FC. Leaving no man behind: how differentiated service delivery models
- 16 increase men's engagement in HIV care. *International Journal of Health Policy and*
- 17 *Management* 2021;10(3):129.
- 18 67. Lecher S, Williams J, Fonjungo PN, et al. Progress with scale-up of HIV viral load
- 19 monitoring—seven sub-Saharan African countries, January 2015–June 2016.
- 20 *Morbidity and Mortality Weekly Report* 2016;65(47):1332-35.
- 21 68. Smith DK, Toledo L, Smith DJ, et al. Attitudes and program preferences of African-
- 22 American urban young adults about pre-exposure prophylaxis (PrEP). *AIDS Educ Prev*
- 23 2012;24(5):408-21.
- 24 69. Rubtsova A, M Wingood G, Dunkle K, et al. Young adult women and correlates of
- 25 potential adoption of pre-exposure prophylaxis (PrEP): results of a national survey.
- 26 *Curr HIV Res* 2013;11(7):543-48.
- 27 70. Wingood GM, Dunkle K, Camp C, et al. Racial differences and correlates of potential
- 28 adoption of pre-exposure prophylaxis (PrEP): results of a national survey. *J Acquir*
- 29 *Immune Defic Syndr* 2013;63(0 1):S95.
- 30 71. Sullivan PS, Mena L, Elope L, et al. Implementation strategies to increase PrEP uptake in
- 31 the South. *Curr HIV/AIDS Rep* 2019;16(4):259-69.
- 32 72. Mugo NR, Ngure K, Kiragu M, et al. PrEP for Africa: what we have learnt and what is
- 33 needed to move to program implementation. *Curr Opin HIV AIDS* 2016;11(1):80.
- 34 73. Siegler AJ, Steehler K, Sales JM, et al. A Review of HIV Pre-exposure Prophylaxis
- 35 Streamlining Strategies. *Curr HIV/AIDS Rep* 2020:1-11.
- 36
- 37
- 38
- 39
- 40
- 41
- 42
- 43
- 44
- 45
- 46
- 47
- 48
- 49
- 50
- 51
- 52
- 53
- 54
- 55
- 56
- 57
- 58
- 59
- 60

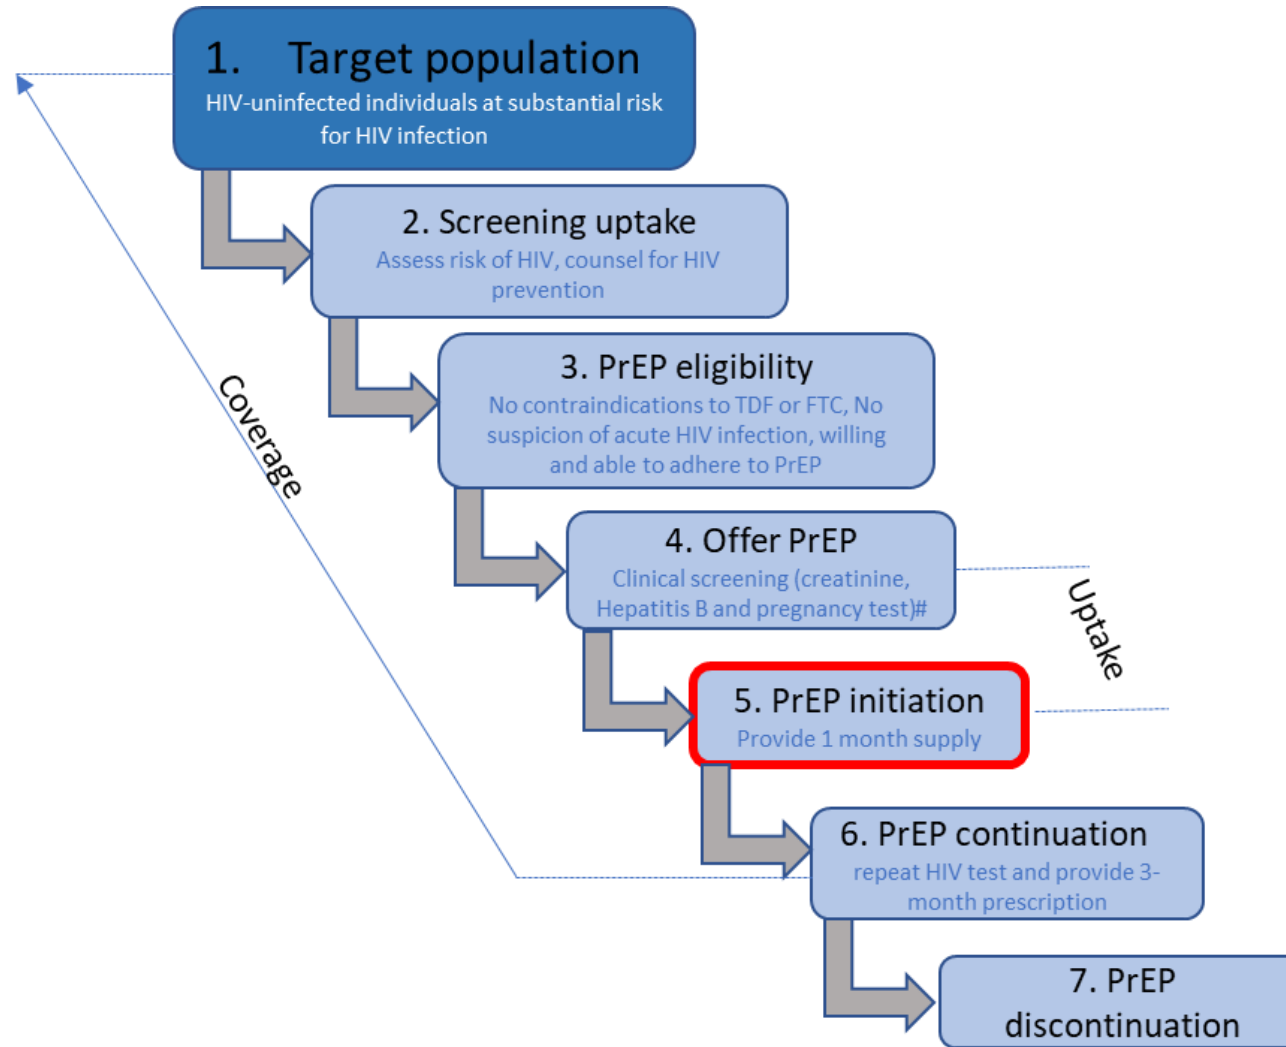

1  
2  
3  
4  
5  
6  
7  
8  
9  
10  
11  
12  
13  
14  
15  
16  
17  
18  
19  
20  
21  
22  
23  
24  
25  
26  
27  
28  
29  
30  
31  
32  
33  
34  
35  
36  
37  
38  
39  
40  
41

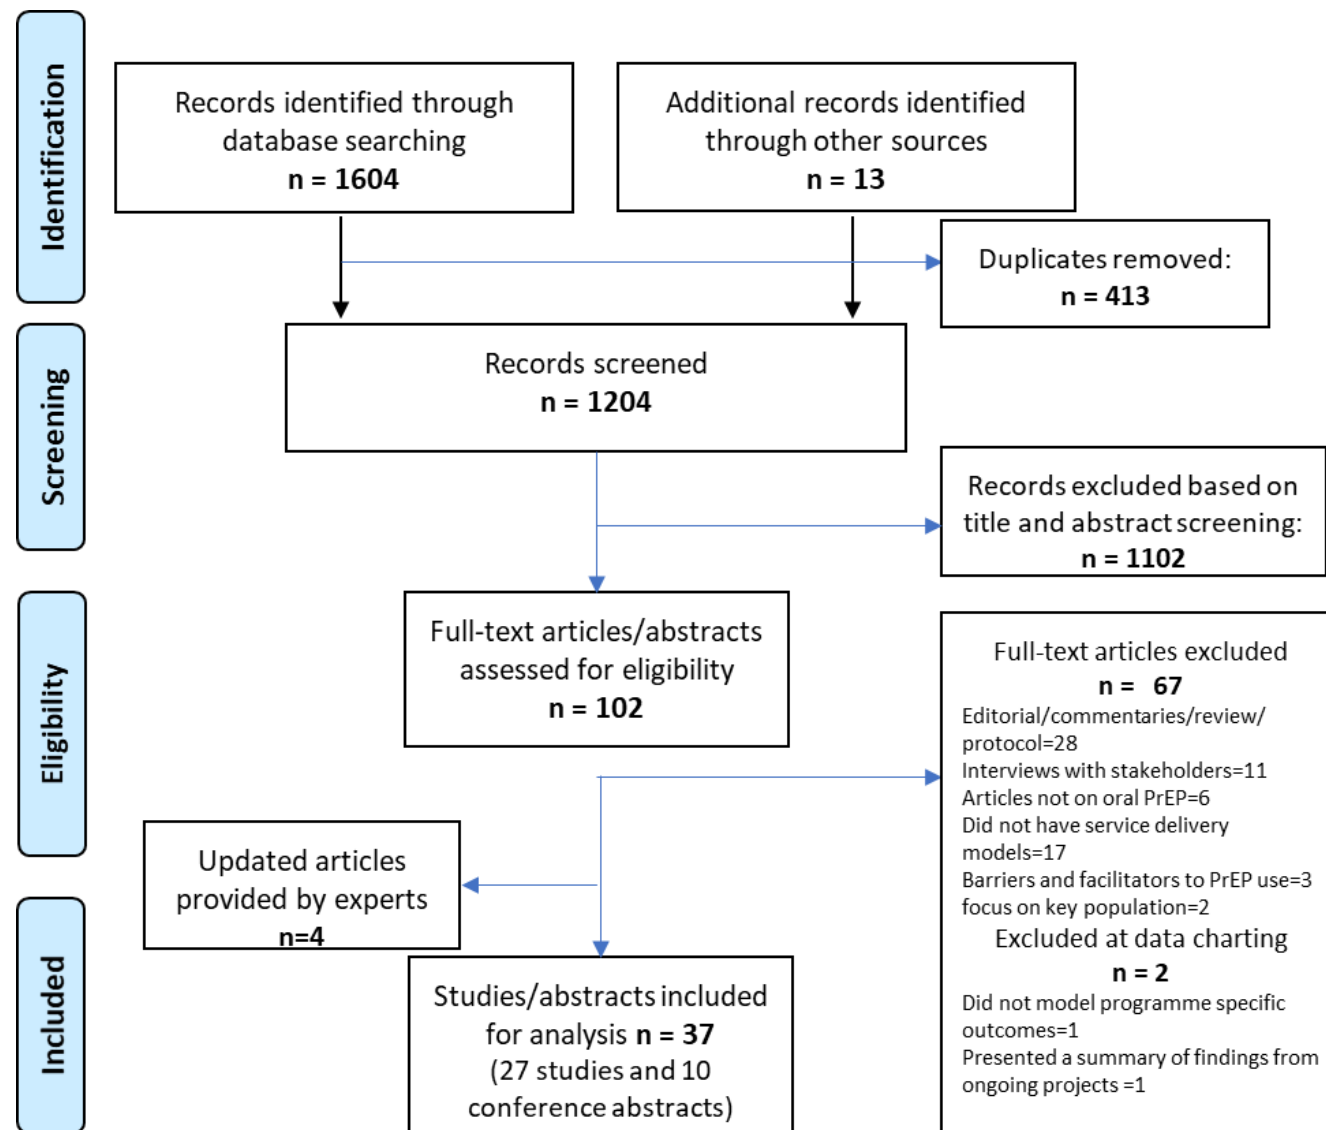



| SET |                                   | SEARCH TERMS                                                                     |
|-----|-----------------------------------|----------------------------------------------------------------------------------|
| 1   | <b>1 HIV</b>                      | HIV-1                                                                            |
| 2   |                                   | HIV                                                                              |
| 3   |                                   | Hiv                                                                              |
| 4   |                                   | Set 1- 3 will be combined with "or"                                              |
| 5   | <b>2 Pre-exposure Prophylaxis</b> | PRE-EXPOSURE PROPHYLAXIS                                                         |
| 6   |                                   | Pre-Exposure Prophylaxis                                                         |
| 7   |                                   | PrEP                                                                             |
| 8   |                                   | Set 5-7 will be combined with "or"                                               |
| 9   |                                   | Set 4 and 8 will be combined with "and"                                          |
| 10  | <b>3 Linkage to care</b>          | service provision                                                                |
| 11  |                                   | service delivery                                                                 |
| 12  |                                   | SDMs                                                                             |
| 13  |                                   | IMPLEMENTATION SCIENCE                                                           |
| 14  |                                   | model                                                                            |
| 15  |                                   | models of care                                                                   |
| 16  |                                   | differentiated care                                                              |
| 17  |                                   | linkage                                                                          |
| 18  |                                   | linkage to care                                                                  |
| 19  |                                   | intervention                                                                     |
| 20  |                                   | Set 10-19 will be combined with "or"                                             |
| 21  |                                   | Set 4, 9 and 20 will be combined with "and"                                      |
| 22  | <b>4 Country</b>                  | DEVELOPING COUNTRY                                                               |
| 23  |                                   | Sub-Saharan                                                                      |
| 24  |                                   | AFRICA SOUTH OF THE SAHARA                                                       |
| 25  |                                   | AFRICA                                                                           |
| 26  |                                   | <i>All sub-Saharan countries included as MeSH and text term combined with or</i> |
| 27  |                                   | Set 22-26 will be combined with "or"                                             |
| 28  |                                   | Set 4, 9, 20 and 27 will be combined with "and"                                  |

| Service Delivery Modality          | Author (Year) and study setting                   | Publication type and objectives                                                                                                                                                  | Study population and Sample                                                                                                                                                                                                                                                 | Intervention description                                                                                                                                                                                                                                                                                                                                                                                                                                                                                                                                                                                                                      | Detailed Description of Findings                                                                                                                                                                                                                                                                                                                                                                                                                                                                                                                                                                                                                                                                                                                                                                                                                                                                                                                                                                                |
|------------------------------------|---------------------------------------------------|----------------------------------------------------------------------------------------------------------------------------------------------------------------------------------|-----------------------------------------------------------------------------------------------------------------------------------------------------------------------------------------------------------------------------------------------------------------------------|-----------------------------------------------------------------------------------------------------------------------------------------------------------------------------------------------------------------------------------------------------------------------------------------------------------------------------------------------------------------------------------------------------------------------------------------------------------------------------------------------------------------------------------------------------------------------------------------------------------------------------------------------|-----------------------------------------------------------------------------------------------------------------------------------------------------------------------------------------------------------------------------------------------------------------------------------------------------------------------------------------------------------------------------------------------------------------------------------------------------------------------------------------------------------------------------------------------------------------------------------------------------------------------------------------------------------------------------------------------------------------------------------------------------------------------------------------------------------------------------------------------------------------------------------------------------------------------------------------------------------------------------------------------------------------|
| <b>Studies among AGYW</b>          |                                                   |                                                                                                                                                                                  |                                                                                                                                                                                                                                                                             |                                                                                                                                                                                                                                                                                                                                                                                                                                                                                                                                                                                                                                               |                                                                                                                                                                                                                                                                                                                                                                                                                                                                                                                                                                                                                                                                                                                                                                                                                                                                                                                                                                                                                 |
| <b>Health facility<sup>a</sup></b> | Maseko et al. (2020) <sup>25</sup><br><br>Malawi  | Manuscript<br><br>To understand knowledge of, interest in, concerns about, and delivery preferences for PrEP among AGYW enrolled in the Girl Power study.                        | <b>Study population:</b><br>Never been offered to use PrEP services (hypothetical opinions related to PrEP)<br><b>Sample</b><br><b>Sample size (total – N):</b> 40<br><b>Gender distribution:</b><br>Female: 100%<br><b>Age distribution:</b><br>15-19yrs: 21; 20-24yrs: 19 | <b>Nature of Intervention:</b> Four models of service-delivery were compared in four separate clinics: Model 1) standard of care (SoC), Model 2) Integrated youth-friendly health services; Model 3) Model 2 plus a small-group behavioural intervention on; and Model 4) Model 3 plus a cash transfer (\$5.50/month).<br>An explanation of PrEP was provided to 40 participants prior to IDI<br><b>Intervention components:</b> HIV testing, syndromic management of STIs, family planning, and condom distribution.<br><b>NB:</b> PrEP was not provided in this study, nor was it available in government clinics at the time of the study. | <ul style="list-style-type: none"> <li>• Interest in PrEP based on a belief that their HIV risk exposure was due to factors that were out of their control, including partners having concurrent relationships, challenges with condom negotiation/use, and rape.</li> <li>• Disinterest in PrEP included: perception of low risk because of abstinence or having a single partner, use of PrEP implying infidelity among married AGYW, taking pills daily implying HIV infection.</li> <li>• Interest in initiating PrEP depends upon: <ul style="list-style-type: none"> <li>- ease of accessing PrEP (confidential),</li> <li>- packaging attributes (discrete, cartons, packets, or bottles that would give the appearance of medications for common ailments preferred</li> <li>- delivery context (available in locations frequented by youth such as schools or youth friendly spaces because of ease of access and comfort in the absence of adult patients and family members).</li> </ul> </li> </ul> |
| <b>Health facility<sup>b</sup></b> | Mugwanya et al. (2019) <sup>26</sup><br><br>Kenya | Manuscript<br><br>To demonstrate the feasibility of integrating PrEP delivery within routine family planning clinics to reach at-risk AGYW for PrEP in HIV high burden settings. | <b>Study population:</b><br>Offered to use PrEP services<br><b>Sample</b><br><b>Sample size (total – N):</b> 1271<br><b>Gender distribution:</b><br>Female: 100%<br><b>Age distribution:</b><br>Median: 25 (22-29)<br><20: 105<br>20-24: 522<br>25-29: 356<br>30-34: 172    | <b>Nature of Intervention:</b> PrEP-dedicated nurse-led integrated delivery of PrEP in family planning clinics<br><b>Intervention components:</b> Newly hired nurses were trained on HIV risk assessment, counselling, and PrEP provision. These nurses performed only these duties at the FP clinic. Women attending FP clinics completed other services were then referred to the PrEP-dedicated nurse. This nurse counselled and assessed                                                                                                                                                                                                  | <ul style="list-style-type: none"> <li>• Of 1,271 women screened, 22% initiated PrEP, and 41% returned for at least one refill.</li> <li>• PrEP uptake was independently associated with reported male-partner HIV status (<math>p &lt; 0.001</math>) and marital status (<math>p = 0.04</math>).</li> <li>• More women &gt;24 years (26%) initiated PrEP compared to young women &lt;24 years (16%).</li> <li>• For women &gt;24 years, the likelihood of initiating PrEP increased by about 3% for each additional year of a woman's age (<math>p &lt; 0.001</math>).</li> </ul>                                                                                                                                                                                                                                                                                                                                                                                                                              |

|                                    |                                                   |                                                                                                                                                       |                                                                                                                                                                                                                                                  |                                                                                                                                                                                                                                                                                                                                                                                                                                                                                                                                                                                                                                                                                                                                                  |                                                                                                                                                                                                                                                                                                                                                                                                                                                                                                                                                                                                                                                                                                                                                                                                                                                                                                                                                                                                |
|------------------------------------|---------------------------------------------------|-------------------------------------------------------------------------------------------------------------------------------------------------------|--------------------------------------------------------------------------------------------------------------------------------------------------------------------------------------------------------------------------------------------------|--------------------------------------------------------------------------------------------------------------------------------------------------------------------------------------------------------------------------------------------------------------------------------------------------------------------------------------------------------------------------------------------------------------------------------------------------------------------------------------------------------------------------------------------------------------------------------------------------------------------------------------------------------------------------------------------------------------------------------------------------|------------------------------------------------------------------------------------------------------------------------------------------------------------------------------------------------------------------------------------------------------------------------------------------------------------------------------------------------------------------------------------------------------------------------------------------------------------------------------------------------------------------------------------------------------------------------------------------------------------------------------------------------------------------------------------------------------------------------------------------------------------------------------------------------------------------------------------------------------------------------------------------------------------------------------------------------------------------------------------------------|
|                                    |                                                   |                                                                                                                                                       | ≥35: 116                                                                                                                                                                                                                                         | willingness to consider PrEP (guided by a national guidelines and HIV risk assessment screening tool). Interested and medically eligible women were provided same-day PrEP initiation.                                                                                                                                                                                                                                                                                                                                                                                                                                                                                                                                                           | <ul style="list-style-type: none"> <li>• FP clinics can be an effective platform to efficiently reach HIV at-risk women who may benefit from PrEP.</li> <li>• Integration of PrEP delivery in FP clinics, makes this a potential "one-stop" location for FP and PrEP.</li> <li>• Although FP visits are busy, efficient implementation strategies such as less frequent PrEP visits and expanding the pool of providers who might be able to screen and provide PrEP beyond the few clinicians and nurses (e.g., training and empowering HIV testing counsellors and community health workers or peer educators) can be built into existing routine services.</li> </ul>                                                                                                                                                                                                                                                                                                                       |
| <b>Health facility<sup>b</sup></b> | Pintye et al. (2018) <sup>27</sup><br><br>Kenya   | Manuscript<br><br>To define approaches for integrating PrEP into routine antenatal and post-natal care (ANC/PNC) using PrIYA Program as a case study. | <b>Study population:</b> Offered to use PrEP services<br><b>Sample</b><br><b>Sample size (total – N):</b> 16 Health facilities; 40 program-supported nurses<br><b>Gender distribution:</b> Female 100%<br><b>Age distribution:</b> not described | <b>Nature of Intervention:</b> Nurse-led teams worked with maternal and child health (MCH) staff at 16 public, faith-based, and private facilities to determine optimal clinic flow for PrEP integration into antenatal (ANC) and postnatal (PNC) care. A program-dedicated nurse facilitated integration.<br><b>Intervention components:</b> All ANC/PNC clients received assessment for behavioural risk (completion of a questionnaire and willingness to consider PrEP, general informational counselling on PrEP depending on the client's awareness and interest in PrEP. Among clients who were willing to initiate PrEP, PrEP counselling also included information on how to use PrEP and adherence as well as medication dispensation. | <ul style="list-style-type: none"> <li>• Clinics developed two approaches for integrating PrEP delivery within ANC/PNC: 1) co-delivery: ANC/PNC and PrEP services delivered by same MCH nurse or 2) sequential services: PrEP services after ANC/PNC by a PrEP-specialized nurse.</li> <li>• 86 ANC/PNC visits were observed.</li> <li>• Clients who initiated PrEP took a median of 18 minutes (IQR 15-26) for PrEP-related activities (risk assessment, PrEP counselling, creatinine testing, dispensation, and documentation) in addition to other routine ANC/PNC activities.</li> <li>• For clients who declined PrEP, an additional 13 minutes (IQR 7-15) was spent on PrEP-related risk assessment and counselling.</li> <li>• PrEP-specific activities took &lt;20 minutes per client, the moderate additional time burden for PrEP initiation in MCH would likely decline with community awareness and innovations such as group/peer counselling or expedited dispensing.</li> </ul> |
| <b>Health facility</b>             | Kinuthia et al. (2020) <sup>28</sup><br><br>Kenya | Manuscript<br><br>We implemented and evaluated a novel programme                                                                                      | <b>Study population:</b> Offered to use PrEP services<br><b>Sample</b><br><b>Sample size (total – N):</b> 9376 women                                                                                                                             | <b>Nature of Intervention:</b> Integration of PrEP into existing structures at 16 maternal and child health clinics (public, faith-based, and private sector) At each facility,                                                                                                                                                                                                                                                                                                                                                                                                                                                                                                                                                                  | <ul style="list-style-type: none"> <li>• PrEP initiation: 2030 (21.7%) women-initiated PrEP: 79.3% women with partners living with HIV, 37.2% with partners of unknown HIV status, and 11.6% women with HIV-negative partners.</li> </ul>                                                                                                                                                                                                                                                                                                                                                                                                                                                                                                                                                                                                                                                                                                                                                      |

|                               |                                                         |                                                                                                                                         |                                                                                                                                                                                                                                                                                                                                                                  |                                                                                                                                                                                                                                                                                                                                                                                                                                                                                                                                                                                                                                                                                                                  |                                                                                                                                                                                                                                                                                                                                                                                                                                                                                                                                                                                                                                                                                                                                                                                                                                                                                                                                                                                                                                                                                                                                                                                                                                                                                                                        |
|-------------------------------|---------------------------------------------------------|-----------------------------------------------------------------------------------------------------------------------------------------|------------------------------------------------------------------------------------------------------------------------------------------------------------------------------------------------------------------------------------------------------------------------------------------------------------------------------------------------------------------|------------------------------------------------------------------------------------------------------------------------------------------------------------------------------------------------------------------------------------------------------------------------------------------------------------------------------------------------------------------------------------------------------------------------------------------------------------------------------------------------------------------------------------------------------------------------------------------------------------------------------------------------------------------------------------------------------------------|------------------------------------------------------------------------------------------------------------------------------------------------------------------------------------------------------------------------------------------------------------------------------------------------------------------------------------------------------------------------------------------------------------------------------------------------------------------------------------------------------------------------------------------------------------------------------------------------------------------------------------------------------------------------------------------------------------------------------------------------------------------------------------------------------------------------------------------------------------------------------------------------------------------------------------------------------------------------------------------------------------------------------------------------------------------------------------------------------------------------------------------------------------------------------------------------------------------------------------------------------------------------------------------------------------------------|
|                               |                                                         | <p>to provide PrEP in maternal and child health clinics in Kenya</p>                                                                    | <p><b>Gender distribution:</b><br/>Female:100%<br/><b>Age distribution:</b><br/>&lt;24: 5033<br/>Median age: 24 years (IQR: 21-28)</p>                                                                                                                                                                                                                           | <p>they offered sensitisation sessions to introduce the programme, educate facility staff on PrEP, and seek advice on the best way to integrate PrEP delivery at the facility.</p> <p><b>Intervention components:</b><br/>Programme nurses approached all eligible women provided PrEP counselling as part of routine maternal and child health clinic processes. Risk was assessed using a using a risk assessment tool<br/>Women who did not know the HIV status of their partners were offered HIV self-testing kits, if they were willing to test with their partners at home. All women (regardless of risk factors) were informed that PrEP was available if they perceived they were at risk for HIV.</p> | <ul style="list-style-type: none"> <li>• 999 (49.2%) women who initiated PrEP were younger than 24 years</li> <li>• Reasons for initiating PrEP: having a partner living with HIV or of unknown HIV status and feeling at risk for acquiring HIV. Reasons for declining PrEP: need to consult partner and low perceived HIV risk<br/>Factors associated with initiation: being younger than 24 years, having a partner living with HIV or of unknown HIV status, gestational age less than 26 weeks among pregnant women, having experienced intimate partner violence in the previous 6 months, or sharing needles while engaging in injection drug use, diagnosed or treated for an STI, forced to have sex, and had recurrently used PEP.</li> <li>• PrEP continuation: 38.7% of 2030 women returned for PrEP refill at least 1 month after initiation</li> <li>• Factors associated with continuation: women with HIV-positive partners.</li> <li>• Reasons for discontinuation: side effects, no longer perceiving HIV risk, and partner known to be HIV-negative.</li> <li>• PrEP refills: 21.7% of women who initiated PrEP at least 3 months before this evaluation returned for PrEP refill. Of these 242 (54.9%) were younger than 24 years and 199 (45.1%) were aged 24 years or older (p=0.05).</li> </ul> |
| <p><b>Health facility</b></p> | <p>Pintye et al. (2019)<sup>29</sup><br/><br/>Kenya</p> | <p>Conference abstract<br/><br/>To understand motivations for early PrEP discontinuation among AGYW and Adolescents (PrIYA) Program</p> | <p><b>Study population:</b><br/>Offered to use PrEP services<br/><b>Sample</b><br/><b>Sample size (total – N):</b><br/>69 AGYW<br/>69 in-depth interviews: 21 AGYW received, but never used PrEP • 24 discontinued PrEP within 1 month • 24 discontinued PrEP within 3 months<br/><b>Gender distribution:</b><br/>Females: 100%<br/><b>Age distribution:</b></p> | <p><b>Nature of Intervention:</b><br/>The PrIYA Program provides real world evidence on delivering PrEP to AGYW seeking routine ANC, PNC and family planning (FP) services within 16 MCH clinics in Kisumu County, Kenya<br/><b>Intervention components:</b><br/>N/A<br/>AGYW were identified by program nurses and purposively sampled based on 3 categories</p>                                                                                                                                                                                                                                                                                                                                                | <ul style="list-style-type: none"> <li>• Interest in initiating PrEP was heavily influenced by one-on-one interactions with a close friend, relative, or teacher/professor</li> <li>• Early PrEP discontinuation patterns were influenced by side effects (feared or experienced) and important life events AGYW frequently stopped PrEP after childbirth and found it challenging to remember to take PrEP during the complex transition to motherhood</li> <li>• AGYW reported that pre-initiation counselling focused on adherence; many were unaware that they could restart PrEP after stopping</li> </ul>                                                                                                                                                                                                                                                                                                                                                                                                                                                                                                                                                                                                                                                                                                        |

|                                                       |                                                                   |                                                                                                                                                                     |                                                                                                                                                                                                                                                                                                            |                                                                                                                                                                                                                                                                                                                                                                                                                                                                                                                                                                                                                                         |                                                                                                                                                                                                                                                                                                                                                                                                                                                                                                                                                                                                                                                                                                                                                                                                                                            |
|-------------------------------------------------------|-------------------------------------------------------------------|---------------------------------------------------------------------------------------------------------------------------------------------------------------------|------------------------------------------------------------------------------------------------------------------------------------------------------------------------------------------------------------------------------------------------------------------------------------------------------------|-----------------------------------------------------------------------------------------------------------------------------------------------------------------------------------------------------------------------------------------------------------------------------------------------------------------------------------------------------------------------------------------------------------------------------------------------------------------------------------------------------------------------------------------------------------------------------------------------------------------------------------------|--------------------------------------------------------------------------------------------------------------------------------------------------------------------------------------------------------------------------------------------------------------------------------------------------------------------------------------------------------------------------------------------------------------------------------------------------------------------------------------------------------------------------------------------------------------------------------------------------------------------------------------------------------------------------------------------------------------------------------------------------------------------------------------------------------------------------------------------|
|                                                       |                                                                   |                                                                                                                                                                     | Age (years) 22 (20-23)                                                                                                                                                                                                                                                                                     |                                                                                                                                                                                                                                                                                                                                                                                                                                                                                                                                                                                                                                         | <ul style="list-style-type: none"> <li>• Messaging on stopping/restarting PrEP tailored to life events common among AGYW, such as childbirth and periods away from partners, could promote appropriate PrEP use</li> </ul>                                                                                                                                                                                                                                                                                                                                                                                                                                                                                                                                                                                                                 |
| <b>Health facility<sup>a</sup></b>                    | Hill et al (2020) <sup>30</sup><br><br>Malawi                     | Manuscript<br><br>To understand the level of interest in PrEP among AGYW at highest HIV risk, and the potential role of perceived risk in motivating PrEP interest. | <p><b>Study population:</b><br/>Never been offered to use PrEP services (hypothetical opinions related to PrEP)</p> <p><b>Sample</b><br/><i>Sample size (total – N):</i> 825<br/><i>Gender distribution:</i><br/>Female: 100%<br/><i>Age distribution:</i><br/>Median: 20 [18 to 22] (range: 15 to 27)</p> | <p><b>Nature of Intervention:</b><br/>AGYW rated their potential interest in using PrEP after receiving this explanation: "PrEP is a medicine that can be used to prevent HIV for people who are HIV-negative. To be protected with PrEP, a pill is taken every day. These pills contain some of the same medicine used to treat people who already have HIV. PrEP is not currently available in Malawi."</p> <p><b>Intervention components:</b><br/>participants were enrolled and followed for one year.<br/><b>NB:</b> PrEP was not provided in this study, nor was it available in government clinics at the time of the study.</p> | <ul style="list-style-type: none"> <li>• Epidemiologic risk scores were positively associated with PrEP interest, high numbers of AGYW both above and below the high-risk cut-off were very interested in PrEP (68% vs. 63%).</li> <li>• Perceived risk partially explained the relationship between HIV risk and PrEP interest; greater epidemiologic HIV risk was associated with high perceived risk, which was in turn associated with PrEP interest.</li> <li>• Many more high-risk AGYW were interested in PrEP (68%) than expressed a high level of perceived HIV risk (26%).</li> <li>• High number of participants with risk scores below the high-risk cut-off who both expressed high perceived risk and interest in PrEP suggesting that demand for PrEP among AGYW may not be well aligned with epidemiologic risk</li> </ul> |
| <b>Mobile clinic/health facility<sup>c</sup></b>      | Travill et al. (2018) <sup>31</sup><br><br>Kenya and South Africa | Conference abstract<br><br>To assess PrEP uptake and sexual behaviour in the POWER cohort.                                                                          | <p><b>Study population:</b><br/>Offered to use PrEP services</p> <p><b>Sample</b><br/><i>Sample size (total – N):</i> 330<br/><i>Gender distribution:</i><br/>Female: 100%<br/><i>Age distribution:</i> Median age: 20.5 years (IQR:19-22)</p>                                                             | <p><b>Nature of Intervention:</b> PrEP was integrated with reproductive health services at family planning clinics (Kisumu, Kenya), an adolescent and youth-friendly clinic (Johannesburg, South Africa [SA]) and a mobile van for reproductive health services for youth (Cape Town, SA)</p> <p><b>Intervention components:</b> PrEP for AGYW</p>                                                                                                                                                                                                                                                                                      | <ul style="list-style-type: none"> <li>• PrEP uptake at the initial visit was 90% across all sites.</li> <li>• Two-thirds (68%) did not know their partners' HIV status and only 4% were in a known sero-discordant relationship.</li> <li>• Main reasons for declining PrEP were fears of HIV stigma or partner reactions</li> <li>• AGYW had evidence of high HIV risk using a risk score, indicating that women initiating PrEP would benefit from it.</li> <li>• AGYW had high willingness to initiate PrEP when delivered in these youth-friendly settings.</li> </ul>                                                                                                                                                                                                                                                                |
| <b>Hybrid (community-health facility)<sup>c</sup></b> | Ong'wen et al. (2018) <sup>32</sup><br><br>Kenya                  | Conference abstract<br><br>To know more about adolescent girls accessing                                                                                            | <p><b>Study population:</b><br/>Offered to use PrEP services</p> <p><b>Sample</b><br/><i>Sample size (total – N):</i> 1851<br/><i>Gender distribution:</i></p>                                                                                                                                             | <p><b>Nature of Intervention:</b><br/>PrEP integration through drop-in centres (DICEs), public and private clinics</p> <p><b>Intervention components:</b></p>                                                                                                                                                                                                                                                                                                                                                                                                                                                                           | <ul style="list-style-type: none"> <li>• Among 28,268 clients initiating PrEP, 1851 (6.5%) were adolescent girls</li> <li>• DICEs, clinics designed primarily for sex workers, were the preferred PrEP outlet for adolescent girls, with 66% accessing services in DICEs, 25% accessed</li> </ul>                                                                                                                                                                                                                                                                                                                                                                                                                                                                                                                                          |

|                                  |                                                                            |                                                                                                                                                                                  |                                                                                                                                                                                              |                                                                                                                                                                                                                                                                                                                                                                                     |                                                                                                                                                                                                                                                                                                                                                                                                                                                                                                                                                                                                                                                                                                                                                                                                                         |
|----------------------------------|----------------------------------------------------------------------------|----------------------------------------------------------------------------------------------------------------------------------------------------------------------------------|----------------------------------------------------------------------------------------------------------------------------------------------------------------------------------------------|-------------------------------------------------------------------------------------------------------------------------------------------------------------------------------------------------------------------------------------------------------------------------------------------------------------------------------------------------------------------------------------|-------------------------------------------------------------------------------------------------------------------------------------------------------------------------------------------------------------------------------------------------------------------------------------------------------------------------------------------------------------------------------------------------------------------------------------------------------------------------------------------------------------------------------------------------------------------------------------------------------------------------------------------------------------------------------------------------------------------------------------------------------------------------------------------------------------------------|
|                                  |                                                                            | routine PrEP services in the context of national scale-up programs.                                                                                                              | Females: 100%<br><b>Age distribution:</b> 15-19 years                                                                                                                                        | The adolescents received either static or outreach services from 93 Jilinde supported clinics                                                                                                                                                                                                                                                                                       | PrEP services in public clinics and 9% in private clinics.<br><ul style="list-style-type: none"> <li>• Entry to PrEP was through peer educators and networks (50%); community outreaches (20%); and within health facilities (30%)</li> <li>• Efforts to make PrEP accessible to AGYW at risk of HIV acquisition should include restructuring the service delivery model</li> </ul>                                                                                                                                                                                                                                                                                                                                                                                                                                     |
| <b>Mobile clinic<sup>c</sup></b> | Rousseau et al. (2019) <sup>33</sup><br><br>South Africa                   | Conference abstract<br><br>Hypothesized that contraceptive use was associated with PrEP uptake and continuation in young women accessing sexual and reproductive health services | <b>Study population:</b> Offered to use PrEP services<br><b>Sample</b><br><b>Sample size (total – N):</b> 1096<br><b>Gender distribution:</b> Female: 100%<br><b>Age distribution:</b> 16-25 | <b>Nature of Intervention:</b> Contraceptive use associated with PrEP uptake and continuation in AGYW accessing sexual and reproductive health services (SRHS) from a mobile clinic<br><b>Intervention components:</b> Sexual reproductive health service including HIV testing, contraception (oral, injectable and implant), and PrEP                                             | <ul style="list-style-type: none"> <li>• Among 1096 AGYW who accessed SRHS 31% initiated PrEP on the same day.</li> <li>• AGYW who were using contraception were significantly more likely to initiate PrEP on the same day compared to those who declined PrEP (76% vs 66% on contraception at that visit; p=0.001).</li> <li>• PrEP initiation was also significantly associated with contraception initiation; contraception was initiated by 44% of AGYW on the same day as PrEP initiation compared to 30% contraception starts in AGYW who declined PrEP (p=0.003).</li> <li>• AGYWs contraception use facilitated PrEP initiation and continuation, PrEP initiation also encouraged young women to initiate contraception use supporting the integration of SRHS with the provision of PrEP for AGYW.</li> </ul> |
| <b>Research site</b>             | Delany-Moretlwe et al. (2018) <sup>34</sup><br><br>South Africa & Tanzania | Conference abstract<br><br>To evaluate whether empowerment clubs increase PrEP uptake and continuation among AGYW.                                                               | <b>Study population:</b> Offered to use PrEP services<br><b>Sample</b><br><b>Sample size (total – N):</b><br>Female:100%<br><b>Age distribution:</b> Not mentioned                           | <b>Nature of Intervention:</b> Participants were randomised to standard of care (SoC), which included comprehensive sexual and reproductive health care, with counselling and SMS reminders for PrEP users, or to empowerment clubs plus SOC.<br><b>Intervention components:</b> Facilitators-led small group sessions and clinic follow-up visits for sexually active AGYW on PrEP | <ul style="list-style-type: none"> <li>• 431 AGYW enrolled and 213 randomised to clubs</li> <li>• 97% initiated PrEP</li> <li>• PrEP continuation did not vary significantly by study arm (p-value =0.31)</li> <li>• PrEP continuation was 73% at month 1, 61% at month 3 and 34% at month 6.</li> <li>• While PrEP uptake was high in this at-risk population, use diminished with time. Empowerment club participation was low and did not enhance PrEP continuation, contrary to experiences in the HIV treatment field.</li> </ul>                                                                                                                                                                                                                                                                                  |
| <b>Research Site</b>             | Donnell et al. (2021) <sup>34</sup>                                        | Manuscript<br><br>To assess the effect of on-site access to                                                                                                                      | <b>Study population:</b> Offered to use PrEP services<br><b>Sample</b>                                                                                                                       | <b>Nature of Intervention:</b> On-site PrEP access at nine trial sites provided by research staff                                                                                                                                                                                                                                                                                   | <ul style="list-style-type: none"> <li>• After on-site PrEP access began 543 (26%) out of 2124 reported PrEP use.</li> </ul>                                                                                                                                                                                                                                                                                                                                                                                                                                                                                                                                                                                                                                                                                            |

|                                                  |                                                    |                                                                                                                                                                                                                                      |                                                                                                                                                                                                                                                                                               |                                                                                                                                                                                                                                                                                                                                                                                                                                                                                                                                                                                                                                                                                                                                                         |                                                                                                                                                                                                                                                                                                                                                                                                                                                                                                                                                                                                                                                                                                                                                                                                                                                                                                                                                                                                                                                                                                                                                                                                                                                                                                                                                                                                                                                                                                                                            |
|--------------------------------------------------|----------------------------------------------------|--------------------------------------------------------------------------------------------------------------------------------------------------------------------------------------------------------------------------------------|-----------------------------------------------------------------------------------------------------------------------------------------------------------------------------------------------------------------------------------------------------------------------------------------------|---------------------------------------------------------------------------------------------------------------------------------------------------------------------------------------------------------------------------------------------------------------------------------------------------------------------------------------------------------------------------------------------------------------------------------------------------------------------------------------------------------------------------------------------------------------------------------------------------------------------------------------------------------------------------------------------------------------------------------------------------------|--------------------------------------------------------------------------------------------------------------------------------------------------------------------------------------------------------------------------------------------------------------------------------------------------------------------------------------------------------------------------------------------------------------------------------------------------------------------------------------------------------------------------------------------------------------------------------------------------------------------------------------------------------------------------------------------------------------------------------------------------------------------------------------------------------------------------------------------------------------------------------------------------------------------------------------------------------------------------------------------------------------------------------------------------------------------------------------------------------------------------------------------------------------------------------------------------------------------------------------------------------------------------------------------------------------------------------------------------------------------------------------------------------------------------------------------------------------------------------------------------------------------------------------------|
|                                                  | South Africa                                       | PrEP on HIV incidence.                                                                                                                                                                                                               | <p><b>Sample size (total – N):</b>2121</p> <p><b>Gender distribution:</b><br/>Female:100%</p> <p><b>Age distribution:</b><br/>16-35 years; median age: 23 years (IQR 20-27)</p>                                                                                                               | <p><b>Intervention components:</b> Research nurse provided PrEP</p>                                                                                                                                                                                                                                                                                                                                                                                                                                                                                                                                                                                                                                                                                     | <ul style="list-style-type: none"> <li>• HIV incidence was 2.16% after on-site PrEP access, compared with 4.65% before PrEP access (p=0.0085).</li> <li>• Future studies of HIV prevention should incorporate PrEP as part of the standard of prevention</li> </ul>                                                                                                                                                                                                                                                                                                                                                                                                                                                                                                                                                                                                                                                                                                                                                                                                                                                                                                                                                                                                                                                                                                                                                                                                                                                                        |
| <p><b>Hybrid (community-Health facility)</b></p> | <p>Were et al (2020)<sup>35</sup></p> <p>Kenya</p> | <p>Manuscript</p> <p>To describe the programmatic application of an oral PrEP cascade; to quantify progression across each step of the cascade for female sex workers (FSW), MSM and AGYW and, to identify missed opportunities.</p> | <p><b>Study population:</b><br/>Offered to use PrEP services</p> <p><b>Sample size (total – N):</b><br/>299,798</p> <p><b>Gender distribution:</b><br/>FSW: 211,927, MSM: 47,533 MSM and AGYW: 40,338</p> <p><b>Age distribution:</b><br/>AGYW: 15-24; FSW &gt;15 years; MSM:&gt;15 years</p> | <p><b>Nature of Intervention:</b><br/>Scaling up oral PrEP through integration into routine health services in drop-in centres (DICEs), public and private health facilities</p> <p><b>Intervention components:</b><br/>Individuals enter the PrEP pathway through community mobilization. Individuals who are interested in PrEP are referred to facilities providing PrEP, where they undergo HIV testing services. Clients who screen positive for substantial behavioural risk, or who request PrEP, are referred to an onsite clinician who conducts a clinical assessment and provides PrEP to clients who are eligible and opt-in. Clients are followed-up visit at the same facility one month following initiation and monthly thereafter.</p> | <p><b>Quantitative:</b></p> <ul style="list-style-type: none"> <li>• Among PrEP-eligible individuals, 2,900 (11%) AGYW, were initiated on PrEP. Of these clients, whereas 55% of AGYW were between 20 and 24 years.</li> <li>• Majority (81%) of clients-initiated PrEP through DICEs, whereas 14% and 5% were initiated through public and private facilities respectively.</li> <li>• PrEP cascade for AGYW aged 15-19 years: HIV-negative (99%), screened (22%), eligible (36%), initiation (95%), month 1 follow-up (31%), month 3 follow up (5%)</li> <li>• PrEP cascade for AGYW aged 20-24 years: HIV-negative (98%), screened (23%), eligible (34%), initiation (91%), month 1 follow-up (32%), month 3 follow up (5%)</li> <li>• AGYW had higher missed opportunities for screening (78%). Among those screened, a substantially higher proportion of AGYW (65%) were ineligible for PrEP.</li> <li>• Missed opportunities for PrEP initiation was 8% among AGYW.</li> <li>• Majority of AGYW did not persist on PrEP use at month-1 (68%) and month-3 (94%) follow-ups.</li> </ul> <p><b>Qualitative</b></p> <ul style="list-style-type: none"> <li>• Eligibility for PrEP: Poor rapport between AGYW and providers inhibits disclosure of risk behaviours. Peer mobilization and referral of low-risk individuals coupled with inadequate client education on PrEP.</li> <li>• Initiation of PrEP: Myths and misconceptions about PrEP and low risk perception among FSW, MSM and AGYW. Co-location of both PrEP and</li> </ul> |

|                                                            |                                                             |                                                                                                                                                       |                                                                                                                                                                                                                                                                                      |                                                                                                                                                                                                                                                                                                                                                     |                                                                                                                                                                                                                                                                                                                                                                                                                                                                                                                                                                                                                                                                                                                                                                                                                                                                                  |
|------------------------------------------------------------|-------------------------------------------------------------|-------------------------------------------------------------------------------------------------------------------------------------------------------|--------------------------------------------------------------------------------------------------------------------------------------------------------------------------------------------------------------------------------------------------------------------------------------|-----------------------------------------------------------------------------------------------------------------------------------------------------------------------------------------------------------------------------------------------------------------------------------------------------------------------------------------------------|----------------------------------------------------------------------------------------------------------------------------------------------------------------------------------------------------------------------------------------------------------------------------------------------------------------------------------------------------------------------------------------------------------------------------------------------------------------------------------------------------------------------------------------------------------------------------------------------------------------------------------------------------------------------------------------------------------------------------------------------------------------------------------------------------------------------------------------------------------------------------------|
|                                                            |                                                             |                                                                                                                                                       |                                                                                                                                                                                                                                                                                      |                                                                                                                                                                                                                                                                                                                                                     | HIV services in comprehensive care centres (HIV clinics) resulted in PrEP clients feeling stigmatized as HIV positive. Stigma-related discouragement from peers, family and friends for eligible users. Providers reluctance to prescribe PrEP associated with reluctance to increase provider workload; provider belief that client will not adhere to PrEP. Insensitive referral and access pathways in public and private health facilities.                                                                                                                                                                                                                                                                                                                                                                                                                                  |
| <b>Studies among Men</b>                                   |                                                             |                                                                                                                                                       |                                                                                                                                                                                                                                                                                      |                                                                                                                                                                                                                                                                                                                                                     |                                                                                                                                                                                                                                                                                                                                                                                                                                                                                                                                                                                                                                                                                                                                                                                                                                                                                  |
| <b>Not specified</b>                                       | Bell et al. (2019) <sup>36</sup><br><br>South Africa        | Conference abstract<br><br>To understand perceptions of PrEP, and barriers and enablers of uptake among young South African men.                      | <b>Study population:</b> Never been offered to use PrEP services (hypothetical opinions related to PrEP)<br><b>Sample</b><br><b>Sample size (total – N):</b> 2077 (Quantitative: 2019; Qualitative: 58)<br><b>Gender distribution:</b> Male: 100%<br><b>Age distribution:</b> 20-34  | <b>Nature of Intervention:</b> Perceptions of PrEP use and barriers and enablers of uptake. 58 IDIs<br><b>Intervention components:</b> N/A                                                                                                                                                                                                          | <ul style="list-style-type: none"> <li>• <b>Enablers to PrEP use:</b> <ul style="list-style-type: none"> <li>- Maintain an HIV-negative status</li> <li>- Avoid conflict and turmoil that HIV diagnosis would bring</li> <li>- High degree of enthusiasm towards the concept</li> </ul> </li> <li>• <b>Barriers to PrEP use:</b> <ul style="list-style-type: none"> <li>- Practical: remembering to take the pill daily, side effects and access to clinics.</li> <li>- Knowledge: Had basic information, confused PrEP with PEP</li> <li>- Psychological: perceived as "only for women" and health seeking behaviour is not the norm for men.</li> <li>- Social: Being seen at clinics by community members, as people will assume that they are HIV positive.</li> <li>- Interpersonal: Keep PrEP use a secret from their partners, friends and family.</li> </ul> </li> </ul> |
| <b>Studies among AGYW and Men</b>                          |                                                             |                                                                                                                                                       |                                                                                                                                                                                                                                                                                      |                                                                                                                                                                                                                                                                                                                                                     |                                                                                                                                                                                                                                                                                                                                                                                                                                                                                                                                                                                                                                                                                                                                                                                                                                                                                  |
| <b>Hybrid (research site- health facility)<sup>e</sup></b> | Heffron et al. (2018) <sup>37</sup><br><br>Kenya and Uganda | Manuscript<br><br>To explore fertility intentions, pregnancy, and evaluated the use of PrEP and ART as peri-conception HIV risk reduction strategies. | <b>Study population:</b> Offered to use PrEP services<br><b>Sample</b><br><b>Sample size (total – N):</b> 1013<br><b>Gender distribution:</b> HIV-infected females: 455; HIV-uninfected males: 224; HIV infected males: 110; HIV-uninfected females: 224<br><b>Age distribution:</b> | <b>Nature of Intervention:</b> The PrEP delivery model integrated PrEP into HIV treatment services. PrEP discontinuation was encouraged once the HIV-infected partner had used ART for at least 6 months (time to achieve HIV viral suppression).<br><br><b>Intervention components:</b> Couples-based HIV prevention counselling; safer conception | <ul style="list-style-type: none"> <li>• Uptake and adherence to integrated PrEP and ART strategy was high with an estimated 96% reduction in HIV incidence.</li> <li>• During the 6 months preceding pregnancy, 82.9% of couples used PrEP or ART and there were no HIV seroconversions, 14.5% used some ART and/or PrEP and 2.6% used neither PrEP nor ART.</li> <li>• Among the 81 couples who were using ART only (61 couples with HIV-infected women and 20 with HIV-infected men), 91.2% of the HIV-uninfected partners had discontinued PrEP due to sustained</li> </ul>                                                                                                                                                                                                                                                                                                  |



|                                                            |                                                          |                                                                                                                                                                             |                                                                                                                                                                                                                                                           |                                                                                                                                                                                                                                                                                                                                                                                                                                                                                                                                                             |                                                                                                                                                                                                                                                                                                                                                                                                                                                                                                                                                                                                                                                                                                                                                                                 |
|------------------------------------------------------------|----------------------------------------------------------|-----------------------------------------------------------------------------------------------------------------------------------------------------------------------------|-----------------------------------------------------------------------------------------------------------------------------------------------------------------------------------------------------------------------------------------------------------|-------------------------------------------------------------------------------------------------------------------------------------------------------------------------------------------------------------------------------------------------------------------------------------------------------------------------------------------------------------------------------------------------------------------------------------------------------------------------------------------------------------------------------------------------------------|---------------------------------------------------------------------------------------------------------------------------------------------------------------------------------------------------------------------------------------------------------------------------------------------------------------------------------------------------------------------------------------------------------------------------------------------------------------------------------------------------------------------------------------------------------------------------------------------------------------------------------------------------------------------------------------------------------------------------------------------------------------------------------|
|                                                            |                                                          |                                                                                                                                                                             | HIV-infected females: 26 (22-30);<br>HIV-uninfected males: 30 (26-37);<br>HIV-uninfected females: 29 (24-35);<br>HIV-infected males: 35 (30-42)                                                                                                           | counselling or contraceptives;<br>counselling and HIV testing for HIV-uninfected partner; PrEP initiation/prescription and adherence counselling; referral of HIV infected partner for ART                                                                                                                                                                                                                                                                                                                                                                  | (i.e., [6 months) ART use by their HIV infected partner.<br><ul style="list-style-type: none"> <li>• Integrated PrEP and ART was readily used by HIV serodiscordant couples.</li> <li>• Widespread scale-up of safer conception counselling and services is warranted to respond to strong desires for pregnancy among HIV-affected men and women.</li> </ul>                                                                                                                                                                                                                                                                                                                                                                                                                   |
| <b>Hybrid (research site- health facility)<sup>e</sup></b> | Ngure et al. (2016) <sup>38</sup><br><br>Kenya           | Manuscript<br><br>To gather insights into couples' decision-making, motivations for PrEP uptake, and experiences soon after PrEP initiation.                                | <b>Study population:</b> Offered to use PrEP services<br><b>Sample</b><br><b>Sample size (total – N):</b> 40<br><b>Gender distribution:</b> Female: 20; Male:20<br><b>Age distribution:</b> Females: 29.1 (20-43), Males: 36.6 (27-57)                    | <b>Nature of Intervention:</b> The PrEP delivery model integrated PrEP into HIV treatment services. PrEP discontinuation was encouraged once the HIV-infected partner had used ART for at least 6 months (time to achieve HIV viral suppression).<br><b>Intervention components:</b> At the time of interview: time since initiating PrEP was 6.3 months and time since initiating ART was 5.6 months                                                                                                                                                       | <ul style="list-style-type: none"> <li>• PrEP offered couples an additional strategy to reduce the risk of HIV transmission, meet their fertility desires, and cope with HIV serodiscordance.</li> <li>• Remaining HIV-negative at follow-up visits reinforced couples' decisions and motivated continued adherence to PrEP. Daily PrEP use supported the HIV-infected partners adherence to ART.</li> <li>• A positive clinical encounter (provider's advice and client-friendly services) motivated initiation and continuation of PrEP</li> </ul>                                                                                                                                                                                                                            |
| <b>Hybrid (community-health facility)<sup>d</sup></b>      | Koss et al. (2018) <sup>39</sup><br><br>Kenya and Uganda | Manuscript<br><br>To report on "early adopters" of PrEP in the Sustainable East Africa Research in Community Health (SEARCH) study in rural Uganda and Kenya. intervention. | <b>Study population:</b> Offered to use PrEP services<br><b>Sample</b><br><b>Population:</b> AGYW Men<br><b>Sample size (total – N):</b> 4064<br><b>Gender distribution:</b> 1934 females 2130 males<br>48% females 52% males<br><b>Age distribution:</b> | <b>Nature of Intervention:</b> PrEP education and discussions occurred on arrival at the health campaign, with HIV counsellors and clinicians. During home-based testing, 1 staff member conducted HIV testing and counselling and provided info about PrEP.<br><br><b>Intervention components:</b> 1-month community mobilization and sensitization activities on PrEP. PrEP risk score or was administered. Hybrid HIV and multi-disease testing was conducted (health campaigns & home-based) with counselling and health education discussions on PrEP. | <ul style="list-style-type: none"> <li>• Of 21 212 HIV-uninfected adults, 4064 were identified for PrEP (2991 by empiric risk score, 1073 by self-identified risk).</li> <li>• 739 individuals started PrEP within 30 days; 77% on the same day.</li> <li>• Among adults identified by risk score, predictors of early adoption included male sex (adjusted odds ratio 1.53; 95% confidence interval, 1.09-2.15), polygamy (1.92; 1.27-2.90), serodiscordant spouse (3.89; 1.18-12.76), self-perceived HIV risk (1.66; 1.28-2.14), and testing at health campaign versus home (5.24; 3.33-8.26).</li> <li>• Among individuals who self-identified for PrEP, predictors of early adoption included older age (2.30; 1.29-4.08) and serodiscordance (2.61; 1.01-6.76).</li> </ul> |

|                                                                                                                                                                                                                                                                                 |                                                                |                                                                                                                                                                     |                                                                                                                                                                                                                                                                                                                          |                                                                                                                                                                                                                                                                                                                                                                                                                                                                                                                                                                                                                                                                                                                                                                                                                                                                                                                                                                                                                                                                             |                                                                                                                                                                                                                                                                                                                                                                                                                                                                                                                                                                                                                                                                                                                                                                                                                                                                                                                                                                                            |
|---------------------------------------------------------------------------------------------------------------------------------------------------------------------------------------------------------------------------------------------------------------------------------|----------------------------------------------------------------|---------------------------------------------------------------------------------------------------------------------------------------------------------------------|--------------------------------------------------------------------------------------------------------------------------------------------------------------------------------------------------------------------------------------------------------------------------------------------------------------------------|-----------------------------------------------------------------------------------------------------------------------------------------------------------------------------------------------------------------------------------------------------------------------------------------------------------------------------------------------------------------------------------------------------------------------------------------------------------------------------------------------------------------------------------------------------------------------------------------------------------------------------------------------------------------------------------------------------------------------------------------------------------------------------------------------------------------------------------------------------------------------------------------------------------------------------------------------------------------------------------------------------------------------------------------------------------------------------|--------------------------------------------------------------------------------------------------------------------------------------------------------------------------------------------------------------------------------------------------------------------------------------------------------------------------------------------------------------------------------------------------------------------------------------------------------------------------------------------------------------------------------------------------------------------------------------------------------------------------------------------------------------------------------------------------------------------------------------------------------------------------------------------------------------------------------------------------------------------------------------------------------------------------------------------------------------------------------------------|
| <p>1<br/>2<br/>3<br/>4<br/>5<br/>6<br/>7<br/>8<br/>9<br/>10<br/>11<br/>12<br/>13<br/>14<br/>15<br/>16<br/>17<br/>18<br/>19<br/>20<br/>21<br/>22<br/>23<br/>24<br/>25<br/>26<br/>27<br/>28<br/>29<br/>30<br/>31</p> <p><b>Hybrid (community-health facility)<sup>d</sup></b></p> | <p>Koss et al. (2020)<sup>40</sup></p> <p>Kenya and Uganda</p> | <p>Manuscript</p> <p>To assess PrEP uptake and engagement after population-level HIV testing and universal PrEP access to characterise gaps in the PrEP cascade</p> | <p><b>Study population:</b> Offered to use PrEP services</p> <p><b>Sample</b></p> <p><b>Sample size (total – N):</b> 12935 (HIV-negative with elevated risk)</p> <p><b>Gender distribution:</b> Female: 6459; Male: 6476</p> <p><b>Age distribution:</b> 15-24: 4800; 25-34: 4712; 35-44: 1927; 45-54: 991; ≥55: 505</p> | <p><b>Nature of Intervention:</b> Population-level HIV and multi-disease testing using a hybrid mobile testing approach at community health fairs, home-based testing or facilities. PrEP initiation at health fairs or at local clinic.</p> <p><b>Intervention components:</b></p> <p><b>Community:</b> community sensitisation, HIV testing, PrEP counselling to HIV- negative people at elevated risk (serodifferent partnership, risk score, or self-identified risk); on-site PrEP start at health fairs or same-day PrEP initiation at local clinics. <b>Home:</b> home-based testing and PrEP counselling, offer of PrEP through local clinics.</p> <p><b>Local clinic:</b> Patients with HIV were asked to bring their HIV-negative or partners with unknown HIV status to the clinic for HIV testing and the offer of PrEP initiation.</p> <p><b>Follow up:</b> visits included supportive delivery system with options for visits at clinic, home, or community locations. Follow up visits included: HCT, PrEP refill blood tests and adherence measurements</p> | <ul style="list-style-type: none"> <li>• In 12935 (10% serodifferent partnership, 54% risk score, 36% self-identified risk) people at elevated risk, 27% initiated PrEP.</li> <li>• 82% initiated PrEP on the same day as HIV testing, 50% of whom were men</li> <li>• 19% of AGYW (15-24 years) initiated PrEP</li> <li>• PrEP uptake was lower among individuals aged 15-24 years and mobile individuals.</li> <li>• At week 4, 64% were engaged in the programme, 49% received medication refills, and 40% self-reported adherence.</li> <li>• At week 72, 56% were engaged, 33% received a refill, and 27% self-reported adherence.</li> <li>• Inclusive risk assessment (combining serodifferent partnership, an empirical risk score, and self-identification of HIV risk) was feasible and identified individuals who could benefit from PrEP.</li> <li>• The biggest gap in the PrEP cascade was PrEP uptake, particularly for young and mobile individuals.</li> <li>•</li> </ul> |
| <p>32<br/>33<br/>34<br/>35<br/>36<br/>37<br/>38<br/>39<br/>40<br/>41<br/>42<br/>43<br/>44<br/>45<br/>46<br/>47</p> <p><b>Hybrid (community-health facility)<sup>d</sup></b></p>                                                                                                 | <p>Mayer et al. (2019)<sup>41</sup></p> <p>Uganda</p>          | <p>Manuscript</p> <p>To estimate the association between distance to clinic and other transportation-related barriers on PrEP uptake and initial clinic visit</p>   | <p><b>Study population:</b> Offered to use PrEP services</p> <p><b>Sample</b></p> <p><b>Sample size (total – N):</b> 701</p> <p><b>Gender distribution:</b> Female: 300; Male: 401</p> <p><b>Age distribution:</b> 15-24: 339; 25-34: 242;</p>                                                                           | <p><b>Nature of Intervention:</b> PrEP was given using a hybrid model and initiation was dependent on participant choice. PrEP could be initiated same day on-site at community health fairs or at local clinic). For those tested at home PrEP was offered within one to six months following the community campaign through local clinics.</p>                                                                                                                                                                                                                                                                                                                                                                                                                                                                                                                                                                                                                                                                                                                            | <ul style="list-style-type: none"> <li>• Of the 701 PrEP-eligible participants, 39% started PrEP within four weeks; of these, 17% were retained at four weeks.</li> <li>• Participants with a distance to clinic of ≥2 km were less likely to start PrEP (p = 0.012) and less likely to be retained on PrEP once initiated (p = 0.024)</li> <li>• Eligible participants (from home-based testing) who did not have the option of same-day PrEP initiation were also less likely to initiate PrEP (p &lt; 0.001).</li> </ul>                                                                                                                                                                                                                                                                                                                                                                                                                                                                |

|                                                       |                                                            |                                                                                                                                                                                                                               |                                                                                                                                                                                                                                                 |                                                                                                                                                                                                                                                                                                                                                                                                                                                                                                                                                                                                           |                                                                                                                                                                                                                                                                                                                                                                                                                                                                                                                                                                                                                                                                                                                                                                                                                                                                                                                                                                                                                                                             |
|-------------------------------------------------------|------------------------------------------------------------|-------------------------------------------------------------------------------------------------------------------------------------------------------------------------------------------------------------------------------|-------------------------------------------------------------------------------------------------------------------------------------------------------------------------------------------------------------------------------------------------|-----------------------------------------------------------------------------------------------------------------------------------------------------------------------------------------------------------------------------------------------------------------------------------------------------------------------------------------------------------------------------------------------------------------------------------------------------------------------------------------------------------------------------------------------------------------------------------------------------------|-------------------------------------------------------------------------------------------------------------------------------------------------------------------------------------------------------------------------------------------------------------------------------------------------------------------------------------------------------------------------------------------------------------------------------------------------------------------------------------------------------------------------------------------------------------------------------------------------------------------------------------------------------------------------------------------------------------------------------------------------------------------------------------------------------------------------------------------------------------------------------------------------------------------------------------------------------------------------------------------------------------------------------------------------------------|
|                                                       |                                                            |                                                                                                                                                                                                                               | 35-44:77;<br>45-54: 991;<br>≥45: 43                                                                                                                                                                                                             | <b>Intervention components:</b><br>Meetings with community stakeholders to sensitise them on PrEP, at community health campaigns (CHCs), eligible HIV-negative participants at elevated risk (serodifferent partnership, risk score, or self-identified risk) were directed to a PrEP education station where they were informed about how PrEP works, interested participants were offered referral to a linkage station to make an appointment at clinic for PrEP enrolment or same-day PrEP start or a clinic appointment at a later date.                                                             | <ul style="list-style-type: none"> <li>Barriers to PrEP use: daily use of PrEP, "low/no risk of getting HIV, transportation-related barriers (clinic is too far away and travel away from home).</li> </ul>                                                                                                                                                                                                                                                                                                                                                                                                                                                                                                                                                                                                                                                                                                                                                                                                                                                 |
| <b>Hybrid (community-health facility)<sup>d</sup></b> | Camlin et al. (2020) <sup>42</sup><br><br>Kenya and Uganda | Manuscript<br><br>To explore understandings of PrEP, elucidate factors influential of demand, decisions around PrEP uptake or non-initiation, and adherence and discontinuation in population subgroups at elevated HIV risk. | <b>Study population:</b><br>Offered to use PrEP services<br><b>Sample</b><br><b>Sample size (total – N):</b> 111<br><b>Gender distribution:</b><br>Females: 65;<br>Males: 46<br><b>Age distribution:</b><br>15-35, median age: 24 (range 17-35) | <b>Nature of Intervention:</b><br>Same day PrEP initiation on-site at community health campaigns or at health facilities. 8 FGDs (4 male, 4 female groups) each with 8-12 participants; 13 IDIs with PrEP initiators and 10 IDIs with PrEP decliners<br><b>Intervention components:</b> As per SEARCH study: Same day initiation of PrEP on-site at community health campaigns or health facilities. Transport to clinics for the PrEP initiation visit. Follow-up visits which occurred at local health facilities, participants' homes, or other community-based locations of the participant's choice. | <ul style="list-style-type: none"> <li>Gendered motivations for PrEP: young men viewed PrEP as a means to safely pursue multiple partners, while young women saw PrEP as a means to control risks in terms of engagement in transactional sex and difficulty in negotiating condom use and partner testing.</li> <li>Uptake was hindered by HIV/ART-related stigma (colour of pill same as ART, accessing PrEP at the same facility where HIV care was provided), the need for partners permission, distance to facilities, mixed messaging on the dosing of PrEP, taking daily medications, living with parents or were attending school, moral prohibitions against sex among young people, desire for "proof" of efficacy by peers</li> <li>Uptake was motivated by high perceived HIV risk, and beliefs that PrEP use supported life goals (completing schooling or having a family).</li> <li>Discontinuation of PrEP was due to dissolution of partnerships/changing risk, unsupportive partners/peers, or early side effects/pill burden.</li> </ul> |
| <b>Hybrid (community)</b>                             | Koss et al. (2017) <sup>43</sup>                           | Conference abstract                                                                                                                                                                                                           | <b>Study population:</b><br>Offered to use PrEP services (nested in SEARCH Trial)                                                                                                                                                               | <b>Nature of Intervention:</b><br>This is a cross sectional study based on SEARCH trial                                                                                                                                                                                                                                                                                                                                                                                                                                                                                                                   | <ul style="list-style-type: none"> <li>In communities that were offered targeted PrEP in this population-based study, multi-level barriers to the uptake of PrEP were identified.</li> </ul>                                                                                                                                                                                                                                                                                                                                                                                                                                                                                                                                                                                                                                                                                                                                                                                                                                                                |

|                                                  |                                                           |                                                                                                                                     |                                                                                                                                                                                                                                                                                                                                                                                                |                                                                                                                                                                                                                                                                                                                                                               |                                                                                                                                                                                                                                                                                                                                                                                                                                                                                                                                                                                                                                                                                                                                                                                                                                                                |
|--------------------------------------------------|-----------------------------------------------------------|-------------------------------------------------------------------------------------------------------------------------------------|------------------------------------------------------------------------------------------------------------------------------------------------------------------------------------------------------------------------------------------------------------------------------------------------------------------------------------------------------------------------------------------------|---------------------------------------------------------------------------------------------------------------------------------------------------------------------------------------------------------------------------------------------------------------------------------------------------------------------------------------------------------------|----------------------------------------------------------------------------------------------------------------------------------------------------------------------------------------------------------------------------------------------------------------------------------------------------------------------------------------------------------------------------------------------------------------------------------------------------------------------------------------------------------------------------------------------------------------------------------------------------------------------------------------------------------------------------------------------------------------------------------------------------------------------------------------------------------------------------------------------------------------|
| <p><b>y-health facility</b> <sup>d</sup></p>     | <p>Kenya and Uganda</p>                                   | <p>To evaluate barriers to the uptake of open-label PrEP offered in a population-based context in high HIV prevalence settings.</p> | <p><b>Sample Population:</b><br/>Men. Women and youth<br/><b>Sample size (total – N):</b><br/>63 Community members:<br/>40% men; 35% women;<br/>25% youth<br/>42 Clients who did not initiate PrEP: 38% women; 45% at risk for HIV by empiric score<br/><b>Gender distribution:</b><br/>16-53 years, median age of 28 years<br/><b>Age distribution:</b><br/>40% men, 35% women, 25% youth</p> | <p><b>Intervention components:</b><br/>n/a<br/><b>Intervention delivery setting:</b><br/>n/a</p>                                                                                                                                                                                                                                                              | <ul style="list-style-type: none"> <li>- In addition to barriers identified in prior studies of targeted populations, such as aspects of pill-taking, concerns about effectiveness, and partner and household--level influence, concerns about access to PrEP via health facilities or at school, opportunity costs, mobility, and misconceptions about PrEP as barriers to uptake in SEARCH communities.</li> <li>• Strategies are needed to address these barriers, such as community sensitization, expanded provision of information on PrEP, and community---based delivery mechanisms to facilitate access to PrEP.</li> </ul>                                                                                                                                                                                                                           |
| <p><b>Hybrid (community-health facility)</b></p> | <p>Gombe et al. (2020)<sup>44</sup><br/><br/>Zimbabwe</p> | <p>Manuscript<br/><br/>To understand the factors that motivate clients to accept, decline, continue, or discontinue PrEP.</p>       | <p><b>Study population:</b><br/>Offered to use PrEP services<br/><b>Sample</b><br/><b>Sample size (total – N):</b> 60<br/><b>Gender distribution:</b><br/>Female: 46; Male: 14<br/><b>Age distribution:</b> 16-25: 20%; 26-40: 60%; &gt;41: 20%</p>                                                                                                                                            | <p><b>Nature of Intervention:</b> PrEP was integrated at two family planning clinics. 54 IDIs with PrEP acceptors and 6 IDIs with PrEP decliners<br/><b>Intervention components:</b><br/>HIV testing; screening for PrEP eligibility according to a tool; same day initiation of PrEP (one-month supply); follow-up visit at month 1 (three-month supply)</p> | <ul style="list-style-type: none"> <li>• Motivators to accept PrEP: High HIV risk perception, preference for PrEP over other HIV prevention methods, perceived severity of living with HIV, confidence in PrEP</li> <li>• Barriers to accepting PrEP: fear of pill burden or impact of pills, wanting partners consent or fearing partner reaction to PrEP, feeling satisfied with current method of HIV prevention</li> <li>• Motivators to continue PrEP: focus on original motivation, establishing daily pill routine, accessible PrEP pill storage, planning ahead before travelling out of town, partner or facility support</li> <li>- Barriers to continuing PrEP: being unaccustomed to taking pills, religious issues, travel out of town, clinic schedule/hours, lack of transport funds, misunderstanding dosing guidance, side effects</li> </ul> |
| <p><b>Health facility</b></p>                    | <p>Sack et al (2020)<sup>51</sup><br/><br/>Mozambique</p> | <p>Manuscript<br/><br/>To explore the perspectives, attitudes, and experiences of HIV serodiscordant partners taking</p>            | <p><b>Study population:</b><br/>Offered to use PrEP services<br/><b>Sample</b><br/><b>Sample size (total – N):</b> 20<br/><b>Gender distribution:</b><br/>Female: 11; Male: 9<br/><b>Age distribution:</b> Median age 35, interquartile range</p>                                                                                                                                              | <p><b>Nature of Intervention:</b> Stories will be presented to discordant couples to try to improve PrEP uptake and reduce incident HIV infections.<br/><b>Intervention components:</b><br/>Three oral stories designed to educate, empower, and normalize PrEP use.</p>                                                                                      | <ul style="list-style-type: none"> <li>• Individual factors influencing PrEP uptake and adherence: love for one's partner, knowledge about PrEP and the belief it is effective, fear of HIV and PrEP stigma</li> <li>• Interpersonal factors affecting PrEP uptake: desire to protect family, partner support and relationship</li> </ul>                                                                                                                                                                                                                                                                                                                                                                                                                                                                                                                      |

|                  |                                                         |                                                                                                                                            |                                                                                                                                                                                                                                                                                                                                                                                                                                                                                                                                                               |                                                                                                                                 |                                                                                                                                                                                                                                                                                                                                                                                                                                                                                                                                                                |
|------------------|---------------------------------------------------------|--------------------------------------------------------------------------------------------------------------------------------------------|---------------------------------------------------------------------------------------------------------------------------------------------------------------------------------------------------------------------------------------------------------------------------------------------------------------------------------------------------------------------------------------------------------------------------------------------------------------------------------------------------------------------------------------------------------------|---------------------------------------------------------------------------------------------------------------------------------|----------------------------------------------------------------------------------------------------------------------------------------------------------------------------------------------------------------------------------------------------------------------------------------------------------------------------------------------------------------------------------------------------------------------------------------------------------------------------------------------------------------------------------------------------------------|
|                  |                                                         | PrEP and develop a messaging campaign to improve PrEP uptake in rural Mozambique to reduce HIV transmission among serodiscordant partners. | 26.5-37.5). Female: median age 32, interquartile range 25.5-36; male: median age 36, interquartile range 31-38.                                                                                                                                                                                                                                                                                                                                                                                                                                               |                                                                                                                                 | strength, Overcoming the fear of stigma to seek support from family and friends                                                                                                                                                                                                                                                                                                                                                                                                                                                                                |
| <b>Community</b> | Bassett et al. (2018) <sup>45</sup><br><br>South Africa | Manuscript<br><br>To assess the acceptability and feasibility of offering family planning and HIV prevention services at salons.           | <b>Study population:</b><br>Never been offered to use PrEP services (hypothetical opinions related to PrEP)<br><b>Sample Population:</b><br>17 hair salons, 92 stylists, 326 clients<br><b>Sample size (total – N):</b><br>Salons (N = 17), Owners (N = 17), Stylists (N = 92), Female clients (N = 326)<br><b>Gender distribution:</b><br>100% of salon clients were female 82% of stylists were female 65% of owners were female<br><b>Age distribution:</b><br>Median age (IQR): Salon clients: 28 (IQR 24 to 33); Stylists: 29 (26-32) Owners: 36 (33-43) | <b>Nature of Intervention:</b><br>n/a<br><b>Intervention components:</b><br>n/a<br><b>Intervention delivery setting:</b><br>n/a | <ul style="list-style-type: none"> <li>Overall, most owners, stylists, and clients were willing to receive contraception and PrEP from a nurse in hair salons in and around Umlazi Township.</li> <li>Frequent client visits and willingness of stylists to offer health education suggest that a stylist initiated, nurse-supported health intervention could be feasible in the salon setting.</li> <li>Hair salons represent a promising venue for reaching young women in sub-Saharan Africa at risk of unintended pregnancy and HIV infection.</li> </ul> |
| <b>Community</b> | Bassett et al. (2019) <sup>46</sup><br><br>South Africa | Manuscript<br><br>To assess the acceptability of nurse-offered contraceptive and PrEP services at                                          | <b>Study population:</b><br>Never been offered to use PrEP services (hypothetical opinions related to PrEP)<br><b>Sample Population:</b>                                                                                                                                                                                                                                                                                                                                                                                                                      | <b>Nature of Intervention:</b><br>n/a<br><b>Intervention components:</b><br>n/a<br><b>Intervention delivery setting:</b><br>n/a | <ul style="list-style-type: none"> <li>Participants felt that incentives would be beneficial to program enrolment, if not necessary, to garner interest among clients. One client noted that incentives have become an expected part of research</li> <li>Overall, participants liked the idea of receiving personal SMS messages and having WhatsApp</li> </ul>                                                                                                                                                                                               |

|                         |                                                           |                                                                                                                                                  |                                                                                                                                                                                                                                                                                                                                                                                                                                                                                                                                                                                                                  |                                                                                                                            |                                                                                                                                                                                                                                                                                                                                                                                                                                                                                                                                                                                                                                                                                                                                                                                                                                                                                                                                                                                 |
|-------------------------|-----------------------------------------------------------|--------------------------------------------------------------------------------------------------------------------------------------------------|------------------------------------------------------------------------------------------------------------------------------------------------------------------------------------------------------------------------------------------------------------------------------------------------------------------------------------------------------------------------------------------------------------------------------------------------------------------------------------------------------------------------------------------------------------------------------------------------------------------|----------------------------------------------------------------------------------------------------------------------------|---------------------------------------------------------------------------------------------------------------------------------------------------------------------------------------------------------------------------------------------------------------------------------------------------------------------------------------------------------------------------------------------------------------------------------------------------------------------------------------------------------------------------------------------------------------------------------------------------------------------------------------------------------------------------------------------------------------------------------------------------------------------------------------------------------------------------------------------------------------------------------------------------------------------------------------------------------------------------------|
|                         |                                                           | <p>hair salons in Durban, South Africa.</p>                                                                                                      | <p>Clients of hair salons- Females, mean age 27 years, hair salon owners, hair stylists<br/> <b>Sample size (total – N):</b><br/>         Clients=42 (all female)<br/>         Stylists=43 (40 female; 3 male) Salon owners=10 (8 female; 2 male)<br/> <b>Gender distribution:</b><br/>         Clients: 42 Females Stylists: 40 Females; 3 Males<br/>         Owners: 8 Females; 2 Males<br/> <b>Age distribution:</b><br/>         Clients: M=27.1; SD=6.3<br/>         Stylists: M=29.6; SD=5.1<br/>         Owners: M=40.3; SD; 7.6</p>                                                                      |                                                                                                                            | <p>groups as adherence supports. Clients preferred SMS messages for direct adherence motivation because they are more private.</p> <ul style="list-style-type: none"> <li>• One client felt that an SMS could also serve as an automated daily reminder for women on PrEP to take their medication. A few participants also noted that SMS would be more accessible than WhatsApp given data constraints.</li> <li>• Overall, participants were enthusiastic about the program. Convenience and a conducive environment were noted as facilitators to receiving health services in the hair salon; attention will have to be directed to establishing privacy and program legitimacy.</li> <li>• Hair salons represent an innovative venue for reaching young women at high-risk for unintended pregnancy and HIV infection.</li> </ul>                                                                                                                                         |
| <p><b>Community</b></p> | <p>Lubwama et al. (2019)<sup>47</sup><br/><br/>Uganda</p> | <p>Conference abstract<br/><br/>A review of PrEP data from PEPFAR Data for Transparency Impact Monitoring (DATIM) for July 2017 to June 2018</p> | <p><b>Study population:</b><br/>Offered to use PrEP services<br/> <b>Sample Population:</b> Key populations including sex workers (SW), men who have sex with men (MSM), transgender persons (TG) and other high-risk groups (fisher folk [FF], discordant couples [DC], truckers, adolescent girls and young women [AGYW] and people who inject drugs).<br/> <b>Sample size (total – N):</b><br/>         Initiated PrEP (6 sites) 3,846<br/>         PrEP clients (1 community): 1538<br/> <b>Gender distribution:</b><br/>         Not mentioned<br/> <b>Age distribution:</b><br/>         Not mentioned</p> | <p><b>Intervention components:</b><br/>         Drop-in centres (DINCs),<br/>         Community based outreach centres</p> | <ul style="list-style-type: none"> <li>• 3,846 individuals-initiated PrEP; 2,568 (67.2%) SW, 327 (8.5%) MSM, 15 (0.4%) TG, and 918 (23.8%) other high-risk groups</li> <li>• One community had 1538 PrEP clients: 58.1% SW, 25.4% FF, 7.4% DC and 0.5% MSM.</li> <li>• Return rates for PrEP were higher among DC (3 months:56.9%, 6 months:46.8%) and low among SW (3 months 37.5%, 6 months 26.3%) and FF (3months 16.4%, 6months 14.2%).</li> <li>• The majority (69.2%, 1064/1538) were reached through outreach models versus fixed public health facilities</li> <li>• More SW than other KP and high-risk groups were reached with PrEP. Retention at 3 and 6 months was low for sex workers and fisherfolk, somewhat higher for discordant couples.</li> <li>• Outreach approaches should be scaled up to reach more KP clients with PrEP. Retention strategies should be strengthened, especially for sex workers and fisherfolk, who may be highly mobile.</li> </ul> |

|                             |                                                              |                                                                                                                                                                                                                              |                                                                                                                                                                                                                                                                                                                                                                                                                                                                                                                                                                                                                                                           |                                                                                                                                                                                                                                                                                                                                                                                                                                                                                                                                                                                                                                   |                                                                                                                                                                                                                                                                                                                                                                                                                                                                                                                                                                                                                                            |
|-----------------------------|--------------------------------------------------------------|------------------------------------------------------------------------------------------------------------------------------------------------------------------------------------------------------------------------------|-----------------------------------------------------------------------------------------------------------------------------------------------------------------------------------------------------------------------------------------------------------------------------------------------------------------------------------------------------------------------------------------------------------------------------------------------------------------------------------------------------------------------------------------------------------------------------------------------------------------------------------------------------------|-----------------------------------------------------------------------------------------------------------------------------------------------------------------------------------------------------------------------------------------------------------------------------------------------------------------------------------------------------------------------------------------------------------------------------------------------------------------------------------------------------------------------------------------------------------------------------------------------------------------------------------|--------------------------------------------------------------------------------------------------------------------------------------------------------------------------------------------------------------------------------------------------------------------------------------------------------------------------------------------------------------------------------------------------------------------------------------------------------------------------------------------------------------------------------------------------------------------------------------------------------------------------------------------|
| <p><b>Community</b></p>     | <p>Morton et al (2020)<sup>48</sup></p> <p>South Africa</p>  | <p>Manuscript</p> <p>To understand how to effectively create awareness, stimulate interest, and increase uptake of PrEP.</p>                                                                                                 | <p><b>Study population:</b><br/>Never been offered to use PrEP services (hypothetical opinions related to PrEP)</p> <p><b>Sample</b><br/><b>Sample size (total – N):</b> 385<br/>Quantitative: 320<br/>Qualitative: 28 key stakeholders; 11 PrEP-naïve young, 10 PrEP-experienced women, five older women living with HIV, four men, seven key informants</p> <p><b>Gender distribution:</b><br/>Female 100% in household surveys</p> <p><b>Age distribution:</b><br/>Quantitative: 20 (18, 23)<br/>Qualitative: PrEP-naïve young women (aged 16-25), PrEP-experienced women (aged 16-29), older women living with HIV (aged 26-32), men (aged 25-35)</p> | <p><b>Nature of Intervention:</b><br/>Young women were shown a 90-second PrEP demand creation video and two informational brochures and then asked to self-administer a short survey that included questions on demographics, sexual relationships, risk taking, HIV risk perception, PrEP interest and knowledge, and their opinions about the video..</p> <p><b>Intervention components:</b><br/>Research staff visited houses up to three times, requesting to speak with the young woman household resident. Young women who agreed to participate were shown the video and then asked to self-administer a short survey.</p> | <p><b>Quantitative</b></p> <ul style="list-style-type: none"> <li>• Most reported interest in learning more about PrEP (67.7% 'definitely interested' and 9.4% 'somewhat interested') and taking PrEP (56.4% 'definitely interested' and 12.5% 'somewhat interested').</li> <li>• Factors significantly associated with interest in taking PrEP were having a primary partner with whom they regularly have sex (80.0% vs. 65.2% without a primary partner; adjusted odds ratio (AOR)=3.1, 95% CI: 1.3, 7.0) and being in a sexual partnership for &lt;6 months (86.8% vs. 68.5% for &gt;12 months; AOR=3.0, 95% CI: 1.2, 7.3).</li> </ul> |
| <p><b>Research site</b></p> | <p>Heffron et al. (2018)<sup>49</sup></p> <p>East Africa</p> | <p>Manuscript</p> <p>To present estimates of effectiveness and patterns of PrEP use within a two-year demonstration project of PrEP for HIV- negative members of heterosexual HIV serodiscordant couples in East Africa.</p> | <p><b>Study population:</b><br/>Offered to use PrEP services</p> <p><b>Sample</b><br/><b>Population:</b><br/>Serodiscordant couples<br/><b>Sample size (total – N):</b> 1010 couples<br/><b>Gender distribution:</b><br/>Males: 1010<br/>Females 1010<br/><b>Age distribution:</b><br/>HIV-: Age, years 30 (26, 36)<br/>HIV+: Age, years 28 (23, 35)</p>                                                                                                                                                                                                                                                                                                  | <p><b>Nature of Intervention:</b><br/>PrEP was offered at enrolment at research site to all HIV-negative participants as PrEP with a daily dosing schedule; participants electing not to initiate PrEP at enrolment were offered PrEP initiation at subsequent visits</p> <p><b>Intervention components:</b> N/A</p> <p><b>Intervention delivery setting:</b><br/>Research site</p>                                                                                                                                                                                                                                               | <ul style="list-style-type: none"> <li>• 97% of HIV-negative partners-initiated PrEP.</li> <li>• Median duration of PrEP use was 12 months (IQR 6-18)</li> <li>• Adherence: 71% of HIV-negative participants took ≥80% of expected doses</li> <li>• 95% reduction (95% CI 86-98%, p&lt;0.0001) in HIV incidence, relative to estimated HIV incidence for the population in the absence of PrEP integrated into HIV treatment services.</li> </ul>                                                                                                                                                                                          |

|                                                                                                    |                                  |                                                            |                                                                                                                                                                                         |                                                                                                                                                                                                                                                                                                           |                                                                                                                                                                                                                                                                                                                                                                     |                                                                                                                                                                                                                                                                                                                                                                                                                                                                                                                                                                                                                                                                                                                                                                                                                                       |
|----------------------------------------------------------------------------------------------------|----------------------------------|------------------------------------------------------------|-----------------------------------------------------------------------------------------------------------------------------------------------------------------------------------------|-----------------------------------------------------------------------------------------------------------------------------------------------------------------------------------------------------------------------------------------------------------------------------------------------------------|---------------------------------------------------------------------------------------------------------------------------------------------------------------------------------------------------------------------------------------------------------------------------------------------------------------------------------------------------------------------|---------------------------------------------------------------------------------------------------------------------------------------------------------------------------------------------------------------------------------------------------------------------------------------------------------------------------------------------------------------------------------------------------------------------------------------------------------------------------------------------------------------------------------------------------------------------------------------------------------------------------------------------------------------------------------------------------------------------------------------------------------------------------------------------------------------------------------------|
| 1<br>2<br>3<br>4<br>5<br>6<br>7<br>8<br>9<br>10<br>11<br>12<br>13<br>14<br>15                      | <b>Research site<sup>e</sup></b> | Ware et al. (2018) <sup>50</sup><br><br>Uganda             | Manuscript<br><br>To evaluate the integrated strategy of delivering PrEP & ART to find out why it was successful.                                                                       | <b>Study population:</b><br>Offered to use PrEP services<br><b>Sample</b><br><b>Sample size (total – N):</b> 93 couples<br><b>Gender distribution:</b><br>Female HIV-uninfected partner: (46%)<br><b>Age distribution:</b><br>HIV uninfected partner: 31 (26 to 37)<br>HIV infected partner 31 (25 to 37) | <b>Nature of Intervention:</b> The integrated strategy offered time-limited PrEP to uninfected partners as a "bridge" to long-term ART in the infected partner. Uninfected partners were offered PrEP at baseline and encouraged to discontinue once infected partners had used ART for six months.<br><b>Intervention components:</b> PrEP was integrated with ART | <ul style="list-style-type: none"> <li>• Couples viewed in services as hope for staying together, attending joint follow up appointments together increased mutual support, and travelling and waiting room time provided an opportunity for discussion, reflection and joint decision making.</li> <li>• Concern for partner wellbeing was a reason for initiating ART whilst the simultaneous use of ARVs turned management of HIV into a shared experience</li> <li>• Couples devised joint strategies for adhering to PrEP and ART such as mutual reminders and emotional and material support for adherence.</li> </ul>                                                                                                                                                                                                          |
| 16<br>17<br>18<br>19<br>20<br>21<br>22<br>23<br>24<br>25<br>26<br>27<br>28<br>29<br>30             | <b>Research site</b>             | Atujuna et al. (2018) <sup>51</sup><br><br>South Africa    | Manuscript<br><br>To explore acceptability and preferences for New biomedical prevention technologies (NPTs) among key and other vulnerable populations in two South African townships. | <b>Study population:</b><br>Never been offered to use PrEP services (hypothetical opinions related to PrEP)<br><b>Sample</b><br><b>Sample size (total – N)</b><br>Adolescents=14<br><b>Gender distribution:</b><br>Heterosexual women=10<br>Heterosexual men=9                                            | <b>Nature of Intervention:</b><br>n/a<br><b>Intervention components:</b><br>n/a<br><b>Intervention delivery setting:</b><br>n/a                                                                                                                                                                                                                                     | <ul style="list-style-type: none"> <li>• Different product preferences and motivations emerged by population based on similarity to existing practices and contexts of vulnerability.</li> <li>• Adult women and female adolescents preferred a vaginal ring and HIV vaccine, motivated by longer duration of protection to mitigate feared repercussions from male partners, including threats to their marriage and safety, and a context of ubiquitous rape.</li> <li>• Male adolescents preferred an HIV vaccine, seen as protection in serodiscordant relationships and convenient in obviating the HIV stigma and cost involved in buying condoms.</li> <li>• Adult men preferred PrEP, given familiarity with oral medications and mistrust of injections, seen as enabling serodiscordant couples to have a child.</li> </ul> |
| 31<br>32<br>33<br>34<br>35<br>36<br>37<br>38<br>39<br>40<br>41<br>42<br>43<br>44<br>45<br>46<br>47 | <b>Research site<sup>e</sup></b> | Baeten et al. (2016) <sup>52</sup><br><br>Kenya and Uganda | Manuscript<br><br>To understand the delivery feasibility and uptake of, as well as adherence to, an integrated package of ART and PrEP among high-risk heterosexual HIV-                | <b>Study population:</b><br>Offered to use PrEP services<br><b>Sample</b><br><b>Sample size (total – N)</b><br>1013 serodiscordant couples<br><b>Gender distribution:</b><br>HIV-1-uninfected partner Male: 679 (67%)<br><b>Age distribution:</b><br>HIV-1-uninfected partner Age <25 y=207 (20%),        | <b>Nature of Intervention:</b><br>HIV- partners were offered PrEP which was provided at the study sites, as PrEP was not available otherwise in Kenya and Uganda during the study period. ART was offered at the study site or by referral to another HIV-1 care center of their choice<br><b>Intervention components:</b>                                          | <ul style="list-style-type: none"> <li>• ART was initiated by 789 (78%) HIV-1-infected partners.</li> <li>• 960/1 013 (95%) HIV-uninfected partners-initiated PrEP at enrolment, and 2% initiated PrEP at a later visit.</li> <li>• Among those initiating PrEP at enrolment and attending the month 1 and 3 visits, 840 (97%) and 792 (94%) continued to receive PrEP.</li> <li>• Adherence to PrEP measured by pill counts of returned, unused pills, indicated that 95% of</li> </ul>                                                                                                                                                                                                                                                                                                                                              |



|                      |                                                       |                                                                                                                                                                                  |                                                                                                                                                                                                                                         |                                                                                                                                                                                                                                                                                                                                                                                                                                                                                                                                                                                                                                                                                                                                                                                                                                   |                                                                                                                                                                                                                                                                                                                                                                                                                                                                                                                                                                                                                                                                                                                                                                                                                                                                                                                                   |
|----------------------|-------------------------------------------------------|----------------------------------------------------------------------------------------------------------------------------------------------------------------------------------|-----------------------------------------------------------------------------------------------------------------------------------------------------------------------------------------------------------------------------------------|-----------------------------------------------------------------------------------------------------------------------------------------------------------------------------------------------------------------------------------------------------------------------------------------------------------------------------------------------------------------------------------------------------------------------------------------------------------------------------------------------------------------------------------------------------------------------------------------------------------------------------------------------------------------------------------------------------------------------------------------------------------------------------------------------------------------------------------|-----------------------------------------------------------------------------------------------------------------------------------------------------------------------------------------------------------------------------------------------------------------------------------------------------------------------------------------------------------------------------------------------------------------------------------------------------------------------------------------------------------------------------------------------------------------------------------------------------------------------------------------------------------------------------------------------------------------------------------------------------------------------------------------------------------------------------------------------------------------------------------------------------------------------------------|
|                      |                                                       | 1-serodiscordant couples                                                                                                                                                         | HIV-1-infected partner Age <25 y= 317 (31%)                                                                                                                                                                                             | <ul style="list-style-type: none"> <li>- Couples were offered antiretroviral medications</li> <li>- Counselling on HIV-1 prevention benefits</li> </ul> PrEP discontinued 6 months after the infected partner initiated antiretroviral treatment                                                                                                                                                                                                                                                                                                                                                                                                                                                                                                                                                                                  | dispensed pills had been taken as expected and 88% of periods between study visits had adherence >80%. <ul style="list-style-type: none"> <li>• 14 initially HIV-1-seronegative partners seroconverted during follow-up (12 were infected at the time of study enrolment).</li> </ul>                                                                                                                                                                                                                                                                                                                                                                                                                                                                                                                                                                                                                                             |
| <b>Research site</b> | Heffron et al. (2019) <sup>53</sup><br><br>Kenya      | Manuscript<br><br>To determine uptake, use and effectiveness of a comprehensive safer conception intervention among HIV-serodiscordant couples with immediate fertility desires. | <b>Study population:</b><br>Offered to use PrEP services<br><b>Sample Population:</b><br>Serodiscordant couples<br><b>Sample size (total – N):</b><br>74<br><b>Gender distribution:</b><br>HIV-negative females/HIV positive males= 54% | <b>Nature of Intervention:</b><br>Couples attended monthly visits at the study clinic prior to pregnancy and quarterly visits during pregnancy. Couples were followed for 12 months or until the end of pregnancy. During all visits, couples received counselling about HIV prevention, information about how to track women's menstrual cycles and identify peak fertility days and how to conduct vaginal self-insemination<br><b>Intervention components:</b><br>The intervention package included antiretroviral therapy (ART) for HIV-positive partners, oral pre-exposure prophylaxis (PrEP) for HIV-negative partners, daily fertility and sexual behaviour tracking via short message service (SMS) surveys, counselling on self-insemination, and referrals for voluntary medical male circumcision and fertility care. | <ul style="list-style-type: none"> <li>• Of the 74 enrolled couples, 54% were HIV-negative female/HIV-positive male couples.</li> <li>• Prior to pregnancy, 100% of partners living with HIV used ART and 100% of HIV-negative partners-initiated PrEP.</li> <li>• One-month preceding pregnancy, 80.9% of HIV-positive partners were virally suppressed and 81.4% of HIV-negative partners were highly adherent to PrEP.</li> <li>• 42.6% pregnancies were protected using all four strategies i.e., men were circumcised, high adherence to PrEP, ART and timed condomless sex.</li> <li>• In addition to male circumcision, seven pregnancies (14.9%) were also protected by high adherence to PrEP and ART, 5 (10.6%) were protected by PrEP and timed condomless sex.</li> <li>• 0 HIV seroconversions (95% CI 0.0 to 6.0 per 100-person years) were observed indicating a 100% reduction in HIV risk (p = 0.04).</li> </ul> |
| <b>Research Site</b> | Minnis et al (2020) <sup>54</sup><br><br>South Africa | Manuscript<br><br>Examined youths' preferences for key attributes of long-acting PrEP, with a focus on characteristics pertinent to product                                      | <b>Study population:</b><br>Never been offered to use PrEP services (hypothetical opinions related to PrEP)<br><b>Sample</b><br><b>Sample size (total – N):</b> 807<br><b>Gender distribution:</b><br>Female: 401 (50%);                | <b>Nature of Intervention:</b><br>Participants were asked to choose between two hypothetical PrEP products composed of five attributes product form (injection, implant); dosing frequency (two, six or twelve months); where to obtain the product (clinic, pharmacy, community distribution, mobile clinic - all                                                                                                                                                                                                                                                                                                                                                                                                                                                                                                                | <ul style="list-style-type: none"> <li>• All three subgroups had strong preference for a product with a one-year duration over two months (p &lt; 0.001).</li> <li>• MSW placed the most importance on dosing frequency, with it being five times more important than any other attribute.</li> <li>• Females had greater preference for a single injection over an implant compared to MSW (p ≤ 0.004).</li> </ul>                                                                                                                                                                                                                                                                                                                                                                                                                                                                                                               |

|                      |                                                  |                                                                                                                                                                                        |                                                                                                                                                                                                                                                                           |                                                                                                                                                                                                                                                                                                                                                                                                                                                                                                                                            |                                                                                                                                                                                                                                                                                                                                                                                                                                                                                                                                                                                                                                                                                                                                                                                                                                                                                                                                                                                                                        |
|----------------------|--------------------------------------------------|----------------------------------------------------------------------------------------------------------------------------------------------------------------------------------------|---------------------------------------------------------------------------------------------------------------------------------------------------------------------------------------------------------------------------------------------------------------------------|--------------------------------------------------------------------------------------------------------------------------------------------------------------------------------------------------------------------------------------------------------------------------------------------------------------------------------------------------------------------------------------------------------------------------------------------------------------------------------------------------------------------------------------------|------------------------------------------------------------------------------------------------------------------------------------------------------------------------------------------------------------------------------------------------------------------------------------------------------------------------------------------------------------------------------------------------------------------------------------------------------------------------------------------------------------------------------------------------------------------------------------------------------------------------------------------------------------------------------------------------------------------------------------------------------------------------------------------------------------------------------------------------------------------------------------------------------------------------------------------------------------------------------------------------------------------------|
|                      |                                                  | delivery alongside key modifiable product attributes.                                                                                                                                  | Men who have sex with women only (MSW): 216 (27%).<br>Men who have sex with men MSM): 190 (23%)<br><b>Age distribution:</b><br>Median age (IQR):<br>Female: 21 (19 to 22);<br>men who have sex with women only: 21 (19 to 22)<br>men who have sex with men: 20 (19 to 22) | models for current HIV prevention and contraceptive service delivery); pain involved with injection or insertion (mild, moderate) and delivery location on the body (arm, buttock, thigh).<br><b>Intervention components:</b><br>Participants completed interviews on a tablet computer. The survey first introduced each attribute individually with both visual and narrative descriptions. Participants were then presented with nine DCE choice questions, each one a unique choice<br><b>NB:</b> PrEP was not provided in this study. | <ul style="list-style-type: none"> <li>• Females and MSW expressed more preference for two injections compared with implants (<math>p \leq 0.009</math>).</li> <li>• Females preferred using a product that was offered at a health clinic over accessing it at a pharmacy (<math>p &lt; 0.001</math>).</li> <li>• All youth preferred product insertion in the arm (<math>p &lt; 0.001</math>).</li> <li>• Females disliked insertion in the thigh and both MSW and MSM disliked insertion on the buttocks (<math>p = 0.01</math>).</li> <li>• Youth indicated strong preferences for longer duration products.</li> </ul> <p>Each attribute nonetheless influenced preferences, offering insight into trade-offs that inform long-acting PrEP development.</p>                                                                                                                                                                                                                                                       |
| <b>Other</b>         |                                                  |                                                                                                                                                                                        |                                                                                                                                                                                                                                                                           |                                                                                                                                                                                                                                                                                                                                                                                                                                                                                                                                            |                                                                                                                                                                                                                                                                                                                                                                                                                                                                                                                                                                                                                                                                                                                                                                                                                                                                                                                                                                                                                        |
| <b>Not described</b> | Jani et al. (2018) <sup>55</sup><br><br>Tanzania | Conference abstract<br><br>To describe support for PrEP use among male partners of AGYW in Tanzania via a qualitative comparative analysis of AGYW's and male partners of AGYW's views | <b>Study population:</b><br>Never been offered to use PrEP services (hypothetical opinions related to PrEP)<br><b>Sample</b><br><b>Sample size (total – N):</b> not described<br><b>Gender distribution:</b> not described<br><b>Age distribution:</b> not described      | <b>Nature of Intervention:</b> Prior to IDIs and FGDs participants were acquainted with PrEP, by sharing a visual, standardized script of PrEP information with them. 24 IDIs and 4 FGDs with AGYW; 16 IDIs with men<br><b>Intervention components:</b> PrEP for AGYW                                                                                                                                                                                                                                                                      | <ul style="list-style-type: none"> <li>• AGYW and male partners agreed that most male partners would be willing to support PrEP use by AGYW.</li> <li>• However, male partner support might be contingent on their early involvement in the decision-making process regarding PrEP.</li> <li>• Early inclusion was perceived to remove suspicion of infidelity and alleviate negative consequences associated with late or inadvertent disclosure of PrEP use.</li> <li>• AGYW suggested potential social harms (relationship dissolution, loss of financial support, and verbal and physical violence) if male partners are not involved whilst male partners denied such potential extreme consequences.</li> <li>• Male participants recommended strategies on gaining men's support of PrEP including providing education to men on PrEP, equipping AGYW with skills to educate their partners, couples counselling by providers, provision of PrEP for men, and community education and sensitization.</li> </ul> |

|                 |                                                      |                                                                                                                                                                                           |                                                                                                                                                                                                                                                                                                                    |                                                                                                                                                                                                                                                                                   |                                                                                                                                                                                                                                                                                                                                                                                                                                                                                                                                                                                                                                                                                                                                                                                                                                                                                                                                     |
|-----------------|------------------------------------------------------|-------------------------------------------------------------------------------------------------------------------------------------------------------------------------------------------|--------------------------------------------------------------------------------------------------------------------------------------------------------------------------------------------------------------------------------------------------------------------------------------------------------------------|-----------------------------------------------------------------------------------------------------------------------------------------------------------------------------------------------------------------------------------------------------------------------------------|-------------------------------------------------------------------------------------------------------------------------------------------------------------------------------------------------------------------------------------------------------------------------------------------------------------------------------------------------------------------------------------------------------------------------------------------------------------------------------------------------------------------------------------------------------------------------------------------------------------------------------------------------------------------------------------------------------------------------------------------------------------------------------------------------------------------------------------------------------------------------------------------------------------------------------------|
|                 |                                                      |                                                                                                                                                                                           |                                                                                                                                                                                                                                                                                                                    |                                                                                                                                                                                                                                                                                   | <ul style="list-style-type: none"> <li>Educating male partners about PrEP and engaging them in implementation activities should be part of PrEP roll-out strategies for AGYW.</li> </ul>                                                                                                                                                                                                                                                                                                                                                                                                                                                                                                                                                                                                                                                                                                                                            |
| Not described   | Makyao et al. (2018) <sup>56</sup><br><br>Tanzania   | Conference abstract<br><br>To explore how social norms and gendered parenting roles might influence parental support of AGYW's PrEP use.                                                  | <b>Study population:</b><br>Never been offered to use PrEP services (hypothetical opinions related to PrEP)<br><b>Sample</b><br><b>Sample size (total – N):</b> 55<br><b>Gender distribution:</b><br>Female parents: 28; Male parents: 27<br><b>Age distribution:</b> not described                                | <b>Nature of Intervention:</b> Prior to IDIs and FGDs participants were acquainted with PrEP, by sharing a visual, standardized script of PrEP information with them. 4 FGDs with male parents and 4 FGDs with female parents<br><b>Intervention components:</b><br>PrEP for AGYW | <ul style="list-style-type: none"> <li>Parents supported PrEP availability recognizing AGYW's high risk of HIV due to limited power to negotiate preventative behaviours and frequent violence in sexual relationships.</li> <li>Differential parenting roles influenced the type of support. Men noted shame and embarrassment in communicating with their daughters about relationships and sex.</li> <li>Social norms around adolescent sexuality influenced parental support. Parents were wary of being viewed as condoning pre-marital sexual activity, while they worried that AGYW could be stigmatized as promiscuous.</li> <li>Parents recommended strategies for supporting their daughters PrEP use included: creating a supportive environment for PrEP use (e.g., ensuring good diet) while male parents described offering logistical and material support (e.g., providing transport to health centres).</li> </ul> |
| n/a (modelling) | Cremin et al. (2015) <sup>57</sup><br><br>Mozambique | Manuscript<br><br>The aim of this paper is to estimate the prevention impact and the cost effectiveness of providing time-limited PrEP to partners of migrant miners in Gaza, Mozambique. | <b>Study population:</b><br>Never been offered to use PrEP services (hypothetical opinions related to PrEP)<br><b>Sample</b><br><b>Population:</b><br>adult heterosexual<br><b>Sample size (total – N):</b><br>Note mentioned (modelling)<br><b>Gender distribution:</b><br>N/A<br><b>Age distribution:</b><br>N/A | <b>Nature of Intervention:</b><br>n/a<br><b>Intervention components:</b><br>n/a<br><b>Intervention delivery setting:</b><br>n/a                                                                                                                                                   | <ul style="list-style-type: none"> <li>Providing time-limited PrEP to partners of migrant miners in Gaza Province during periods of increased exposure would be a novel strategy for providing PrEP. This strategy would allow for a better prioritized intervention, with the potential to improve the efficiency of a PrEP intervention considerably, as well as providing important reproductive health benefits</li> </ul>                                                                                                                                                                                                                                                                                                                                                                                                                                                                                                      |
| n/a Modelling   | Irungu et al. (2019) <sup>58</sup><br>Kenya          | Manuscript<br><br>To provide estimates of the cost of delivering                                                                                                                          | <b>Study population:</b><br>Never been offered to use PrEP services (hypothetical opinions related to PrEP)<br><b>Sample</b>                                                                                                                                                                                       | <b>Nature of Intervention:</b><br>n/a<br><b>Intervention components:</b><br>n/a                                                                                                                                                                                                   | <ul style="list-style-type: none"> <li>Time-limited provision of PrEP to the HIV uninfected partner within HIV serodiscordant couples can be an affordable delivery model implemented in HIV care programs in Kenya and</li> </ul>                                                                                                                                                                                                                                                                                                                                                                                                                                                                                                                                                                                                                                                                                                  |

|                                     |                                                           |                                                                                                                                                                                    |                                                                                                                                                                                                                                                                          |                                                                                                                                                                                             |                                                                                                                                                                                                                                                                                                                                                                                                                                                                                                            |
|-------------------------------------|-----------------------------------------------------------|------------------------------------------------------------------------------------------------------------------------------------------------------------------------------------|--------------------------------------------------------------------------------------------------------------------------------------------------------------------------------------------------------------------------------------------------------------------------|---------------------------------------------------------------------------------------------------------------------------------------------------------------------------------------------|------------------------------------------------------------------------------------------------------------------------------------------------------------------------------------------------------------------------------------------------------------------------------------------------------------------------------------------------------------------------------------------------------------------------------------------------------------------------------------------------------------|
|                                     |                                                           | antiretroviral-based HIV prevention to HIV serodiscordant couples in public health facilities in Kenya and the incremental cost of providing PrEP as a component of this strategy. | <p><b>Population:</b><br/>Heterosexual couples</p> <p><b>Sample size (total – N):</b><br/>N/A</p> <p><b>Gender distribution:</b><br/>none provided</p> <p><b>Age distribution:</b><br/>No age disaggregation</p>                                                         |                                                                                                                                                                                             | similar settings. These costs can be used for budgetary planning and cost effectiveness analyses.                                                                                                                                                                                                                                                                                                                                                                                                          |
| n/a<br><b>Modelling<sup>e</sup></b> | Ngure et al. (2020) <sup>30</sup><br><br>Kenya and Uganda | Manuscript<br><br>To estimate the associations between effective contraceptive use and 1) PrEP dispensation 2) high effective PrEP use                                             | <p><b>Study population:</b><br/>Offered to use PrEP services</p> <p><b>Sample Population:</b><br/><b>Sample size (total – N):</b> 311</p> <p><b>Gender distribution:</b><br/>Female: 100%</p> <p><b>Age distribution:</b><br/>Median age: 29 years ([IQR] 24.0-35.0)</p> | <p><b>Nature of Intervention:</b><br/>HIV-uninfected women were provided with both PrEP and effective contraception</p> <p><b>Intervention components:</b> PrEP was integrated with ART</p> | <ul style="list-style-type: none"> <li>• PrEP dispensation was more frequent among those concurrently using effective contraception, (adjusted relative risk [aRR]=1.19; 95% confidence interval [CI]=1.08-1.32) and contraceptive use was more common among those on PrEP (aRR=1.63; 95% CI=1.18-2.25).</li> <li>• Healthcare delivery models that integrate the provision of family planning and PrEP may successfully promote both preventive products, especially long-acting contraception</li> </ul> |

a. Conducted in the context of the Girl Power study b. Conducted in the context of the PrEP Implementation in Young Women and Adolescents (PrYA) study c. Conducted in the context of the Prevention Option for Women Evaluation Research (POWER) project d. Conducted in the context of the Sustainable East Africa *Research* in Community Health (SEARCH) study e. Implemented within The Partners Demonstration Project

| Author                                                                                                                                                                                            | Item |   |   |   |   |     |   |   |   |    | 11 |
|---------------------------------------------------------------------------------------------------------------------------------------------------------------------------------------------------|------|---|---|---|---|-----|---|---|---|----|----|
|                                                                                                                                                                                                   | 1    | 2 | 3 | 4 | 5 | 6   | 7 | 8 | 9 | 10 |    |
| <b>Qualitative studies using the CASP Tool <sup>22</sup></b>                                                                                                                                      |      |   |   |   |   |     |   |   |   |    |    |
| Atujuna et al., 2018 <sup>51</sup>                                                                                                                                                                | +    | + | + | + | + | +   | + | + | + | +  |    |
| Bassett et al., 2019 <sup>46</sup>                                                                                                                                                                | +    | + | + | ? | + | ?   | + | + | + | +  |    |
| Bell et al., 2019 <sup>36*</sup>                                                                                                                                                                  | +    | + | + | ? | ? | -   | - | ? | - | ?  |    |
| Camlin et al., 2020 <sup>42</sup>                                                                                                                                                                 | +    | + | + | + | + | +   | + | + | + | +  |    |
| Gombe et al., 2020 <sup>44</sup>                                                                                                                                                                  | +    | + | ? | ? | + | +   | + | + | + | +  |    |
| Jani et al., <sup>55</sup>                                                                                                                                                                        | +    | + | + | ? | ? | -   | ? | ? | + | ?  |    |
| Makyao et al., <sup>56</sup>                                                                                                                                                                      | +    | + | + | ? | ? | -   | - | ? | ? | ?  |    |
| Maseko et al., <sup>25</sup>                                                                                                                                                                      | +    | ? | - | - | + | ?   | - | + | ? | ?  |    |
| Ngure et al., 2016 <sup>38</sup>                                                                                                                                                                  | +    | + | + | + | + | +   | + | + | + | +  |    |
| Pintye et al., 2019 <sup>29</sup>                                                                                                                                                                 | +    | + | + | ? | + | ?   | ? | ? | + | +  |    |
| Ware et al., 2018 <sup>50</sup>                                                                                                                                                                   | +    | + | + | + | + | ?   | + | ? | ? | ?  |    |
| Morton et al., 2020 <sup>48*</sup>                                                                                                                                                                | +    | + | + | + | + | -   | + | ? | + | +  |    |
| Were et al., 2020 <sup>35*</sup>                                                                                                                                                                  | +    | + | + | + | + | +   | + | + | + | +  |    |
| Sack et al., 2021 <sup>51</sup>                                                                                                                                                                   | +    | + | + | + | + | +   | + | + | + | +  |    |
| <b>Comparative studies including randomised trials, nonrandomised trials, interrupted time series and controlled-before after studies using the EPOC tool <sup>21</sup></b>                       |      |   |   |   |   |     |   |   |   |    |    |
| Delany-Moretlwe et al., 2018 <sup>34</sup>                                                                                                                                                        | ?    | ? | + | ? | ? | ?   | ? | ? | ? |    |    |
| Koss et al., 2018 <sup>39</sup>                                                                                                                                                                   | -    | ? | + | + | ? | +   | + | + | + |    |    |
| Donnell et al., 2021 <sup>34</sup>                                                                                                                                                                | ?    | ? | + | + | ? | ?   | ? | + | + |    |    |
| <b>Studies involving descriptions of interventions, implementation or policy processes with very limited empirical data and other non-conventional sources using the WEIRD tool <sup>23</sup></b> |      |   |   |   |   |     |   |   |   |    |    |
| Baetan et al., 2016 <sup>52</sup>                                                                                                                                                                 | +    | + | + | ! | + | N/A | ! | + | + | +  | +  |
| Bassett et al., 2018 <sup>45</sup>                                                                                                                                                                | +    | + | ? | + | + | +   | ? | + | + | +  | +  |
| Bell et al., 2019 <sup>36*</sup>                                                                                                                                                                  | !    | - | - | ? | ? | ?   | ? | - | ? | -  | -  |
| Heffron et al., 2018 <sup>49</sup>                                                                                                                                                                | +    | ? | ! | ? | ? | +   | ? | + | + | +  | +  |
| Heffron et al., 2018 <sup>37</sup>                                                                                                                                                                | +    | ! | ! | ! | - | !   | ? | ? | ? | +  | +  |

|                                    |   |   |   |   |     |     |   |   |   |   |   |
|------------------------------------|---|---|---|---|-----|-----|---|---|---|---|---|
| Kinuthia et al.,2020 <sup>28</sup> | + | + | + | ! | ?   | N/A | ! | ! | ! | + | + |
| Koss et al., 2020 <sup>40</sup>    | ? | ? | ? | ? | ?   | ?   | ? | ? | ? | ? | ? |
| Koss et al.,2017 <sup>43</sup>     | - | - | - | - | -   | +   | ? | ? | + | ? | - |
| Lubwama et al., 2019 <sup>47</sup> | - | + | - | ? | N/A | !   | - | - | ? | + | - |
| Mayer et al.,2019 <sup>41</sup>    | + | + | + | + | +   | N/A | ! | + | + | + | + |
| Mugwanya et al.,2019 <sup>26</sup> | + | + | ? | ? | !   | !   | ! | ! | ! | + | ! |
| Ongwen et al.,2019 <sup>32</sup>   | ! | ! | ? | ! | +   | N/A | ! | - | ! | ? | - |
| Pintye et al.,2018 <sup>27</sup>   | + | ! | ! | ! | ?   | ?   | ? | ! | ! | ? | ? |
| Rousseau et al.,2019 <sup>33</sup> | ? | ? | ? | ? | ?   | ?   | ? | ? | ? | ? | ? |
| Travill et al.,2018 <sup>31</sup>  | ! | ? | ? | ! | ?   | ?   | ? | - | - | - | - |
| Hill et al.,2020 <sup>30</sup>     | + | + | + | + | +   | +   | + | + | + | + | + |
| Morton et al.,2020 <sup>48*</sup>  | + | + | + | + | +   | +   | + | + | + | ! | + |
| Minnis et al.,2020 <sup>54</sup>   | + | + | + | + | +   | +   | + | + | + | + | + |
| Were et al.,2020 <sup>35*</sup>    | + | + | + | + | +   | +   | + | + | + | + | + |

+=Yes/Low risk/No or very minor concerns; -=No/High risk/Serious concerns'; ?=Can't tell/Unclear risk/Moderate concerns; !=Minor concerns

\*Mixed methods study, Modelling studies were not appraised

## Preferred Reporting Items for Systematic reviews and Meta-Analyses extension for Scoping Reviews (PRISMA-ScR) Checklist

| SECTION                                               | ITEM | PRISMA-ScR CHECKLIST ITEM                                                                                                                                                                                                                                                                                  | REPORTED ON PAGE # |
|-------------------------------------------------------|------|------------------------------------------------------------------------------------------------------------------------------------------------------------------------------------------------------------------------------------------------------------------------------------------------------------|--------------------|
| <b>TITLE</b>                                          |      |                                                                                                                                                                                                                                                                                                            |                    |
| Title                                                 | 1    | Identify the report as a scoping review.                                                                                                                                                                                                                                                                   | 1                  |
| <b>ABSTRACT</b>                                       |      |                                                                                                                                                                                                                                                                                                            |                    |
| Structured summary                                    | 2    | Provide a structured summary that includes (as applicable): background, objectives, eligibility criteria, sources of evidence, charting methods, results, and conclusions that relate to the review questions and objectives.                                                                              | 2                  |
| <b>INTRODUCTION</b>                                   |      |                                                                                                                                                                                                                                                                                                            |                    |
| Rationale                                             | 3    | Describe the rationale for the review in the context of what is already known. Explain why the review questions/objectives lend themselves to a scoping review approach.                                                                                                                                   | 3-5                |
| Objectives                                            | 4    | Provide an explicit statement of the questions and objectives being addressed with reference to their key elements (e.g., population or participants, concepts, and context) or other relevant key elements used to conceptualize the review questions and/or objectives.                                  | 5                  |
| <b>METHODS</b>                                        |      |                                                                                                                                                                                                                                                                                                            |                    |
| Protocol and registration                             | 5    | Indicate whether a review protocol exists; state if and where it can be accessed (e.g., a Web address); and if available, provide registration information, including the registration number.                                                                                                             | 6                  |
| Eligibility criteria                                  | 6    | Specify characteristics of the sources of evidence used as eligibility criteria (e.g., years considered, language, and publication status), and provide a rationale.                                                                                                                                       | 6-7                |
| Information sources*                                  | 7    | Describe all information sources in the search (e.g., databases with dates of coverage and contact with authors to identify additional sources), as well as the date the most recent search was executed.                                                                                                  | 7                  |
| Search                                                | 8    | Present the full electronic search strategy for at least 1 database, including any limits used, such that it could be repeated.                                                                                                                                                                            | 7                  |
| Selection of sources of evidence†                     | 9    | State the process for selecting sources of evidence (i.e., screening and eligibility) included in the scoping review.                                                                                                                                                                                      | 7                  |
| Data charting process‡                                | 10   | Describe the methods of charting data from the included sources of evidence (e.g., calibrated forms or forms that have been tested by the team before their use, and whether data charting was done independently or in duplicate) and any processes for obtaining and confirming data from investigators. | 7                  |
| Data items                                            | 11   | List and define all variables for which data were sought and any assumptions and simplifications made.                                                                                                                                                                                                     | 7                  |
| Critical appraisal of individual sources of evidence§ | 12   | If done, provide a rationale for conducting a critical appraisal of included sources of evidence; describe the methods used and how this information was used in any data synthesis (if appropriate).                                                                                                      | 7                  |

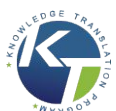

| SECTION                                       | ITEM | PRISMA-ScR CHECKLIST ITEM                                                                                                                                                                       | REPORTED ON PAGE # |
|-----------------------------------------------|------|-------------------------------------------------------------------------------------------------------------------------------------------------------------------------------------------------|--------------------|
| Synthesis of results                          | 13   | Describe the methods of handling and summarizing the data that were charted.                                                                                                                    | 8                  |
| <b>RESULTS</b>                                |      |                                                                                                                                                                                                 |                    |
| Selection of sources of evidence              | 14   | Give numbers of sources of evidence screened, assessed for eligibility, and included in the review, with reasons for exclusions at each stage, ideally using a flow diagram.                    | 8-9                |
| Characteristics of sources of evidence        | 15   | For each source of evidence, present characteristics for which data were charted and provide the citations.                                                                                     | 9-28               |
| Critical appraisal within sources of evidence | 16   | If done, present data on critical appraisal of included sources of evidence (see item 12).                                                                                                      | 29                 |
| Results of individual sources of evidence     | 17   | For each included source of evidence, present the relevant data that were charted that relate to the review questions and objectives.                                                           | 29-33              |
| Synthesis of results                          | 18   | Summarize and/or present the charting results as they relate to the review questions and objectives.                                                                                            | 29-33              |
| <b>DISCUSSION</b>                             |      |                                                                                                                                                                                                 |                    |
| Summary of evidence                           | 19   | Summarize the main results (including an overview of concepts, themes, and types of evidence available), link to the review questions and objectives, and consider the relevance to key groups. | 33-36              |
| Limitations                                   | 20   | Discuss the limitations of the scoping review process.                                                                                                                                          | 36                 |
| Conclusions                                   | 21   | Provide a general interpretation of the results with respect to the review questions and objectives, as well as potential implications and/or next steps.                                       | 36                 |
| <b>FUNDING</b>                                |      |                                                                                                                                                                                                 |                    |
| Funding                                       | 22   | Describe sources of funding for the included sources of evidence, as well as sources of funding for the scoping review. Describe the role of the funders of the scoping review.                 | 37                 |

JBI = Joanna Briggs Institute; PRISMA-ScR = Preferred Reporting Items for Systematic reviews and Meta-Analyses extension for Scoping Reviews.

\* Where *sources of evidence* (see second footnote) are compiled from, such as bibliographic databases, social media platforms, and Web sites.

† A more inclusive/heterogeneous term used to account for the different types of evidence or data sources (e.g., quantitative and/or qualitative research, expert opinion, and policy documents) that may be eligible in a scoping review as opposed to only studies. This is not to be confused with *information sources* (see first footnote).

‡ The frameworks by Arksey and O'Malley (6) and Levac and colleagues (7) and the JBI guidance (4, 5) refer to the process of data extraction in a scoping review as data charting.

§ The process of systematically examining research evidence to assess its validity, results, and relevance before using it to inform a decision. This term is used for items 12 and 19 instead of "risk of bias" (which is more applicable to systematic reviews of interventions) to include and acknowledge the various sources of evidence that may be used in a scoping review (e.g., quantitative and/or qualitative research, expert opinion, and policy document).

From: Tricco AC, Lillie E, Zarin W, O'Brien KK, Colquhoun H, Levac D, et al. PRISMA Extension for Scoping Reviews (PRISMA-ScR): Checklist and Explanation. *Ann Intern Med.* 2018;169:467–473. doi: [10.7326/M18-0850](https://doi.org/10.7326/M18-0850).





# BMJ Open

## Service delivery models that promote linkages to PrEP for adolescent girls and young women and men in sub-Saharan Africa: A scoping review

|                                 |                                                                                                                                                                                                                                                                                                                                                                                                                                                                                                                                                                                                                                                                                                                                                                                                                                                                                                                                                                                                                                                                                                                                                                                                                                                                                                                                                                                                                                                                                                                                                                  |
|---------------------------------|------------------------------------------------------------------------------------------------------------------------------------------------------------------------------------------------------------------------------------------------------------------------------------------------------------------------------------------------------------------------------------------------------------------------------------------------------------------------------------------------------------------------------------------------------------------------------------------------------------------------------------------------------------------------------------------------------------------------------------------------------------------------------------------------------------------------------------------------------------------------------------------------------------------------------------------------------------------------------------------------------------------------------------------------------------------------------------------------------------------------------------------------------------------------------------------------------------------------------------------------------------------------------------------------------------------------------------------------------------------------------------------------------------------------------------------------------------------------------------------------------------------------------------------------------------------|
| Journal:                        | <i>BMJ Open</i>                                                                                                                                                                                                                                                                                                                                                                                                                                                                                                                                                                                                                                                                                                                                                                                                                                                                                                                                                                                                                                                                                                                                                                                                                                                                                                                                                                                                                                                                                                                                                  |
| Manuscript ID                   | bmjopen-2022-061503.R2                                                                                                                                                                                                                                                                                                                                                                                                                                                                                                                                                                                                                                                                                                                                                                                                                                                                                                                                                                                                                                                                                                                                                                                                                                                                                                                                                                                                                                                                                                                                           |
| Article Type:                   | Original research                                                                                                                                                                                                                                                                                                                                                                                                                                                                                                                                                                                                                                                                                                                                                                                                                                                                                                                                                                                                                                                                                                                                                                                                                                                                                                                                                                                                                                                                                                                                                |
| Date Submitted by the Author:   | 22-Dec-2022                                                                                                                                                                                                                                                                                                                                                                                                                                                                                                                                                                                                                                                                                                                                                                                                                                                                                                                                                                                                                                                                                                                                                                                                                                                                                                                                                                                                                                                                                                                                                      |
| Complete List of Authors:       | Chirinda, Witness; South African Medical Research Council, Health Systems Research Unit<br>Ramraj, Trisha; South African Medical Research Council Durban, HIV Prevention Research Unit<br>Jonas, Kim; South African Medical Research Council, Health Systems Research<br>Govindasamy, D.; South African Medical Research Council, Health Systems Research Unit; University of Cape Town, Adolescent Health Research Unit<br>Jama, N.; South African Medical Research Council, Burden of Disease Research Unit<br>McClinton Appollis, Tracy; South African Medical Research Council, Health Systems Research Unit; University of Cape Town, Adolescent Health Research Unit<br>Zani, Babalwa; South African Medical Research Council, Burden of Disease Research Unit<br>Mukumbang, Ferdinand; South African Medical Research Council, Burden of Disease Research Unit<br>Basera, W.; South African Medical Research Council, Burden of Disease Research Unit<br>Hlongwa, Mbuzeleni ; South African Medical Research Council, Burden of Disease Research Unit<br>Turawa, Eunice; South African Medical Research Council, Burden of Disease Research Unit; Stellenbosch University Faculty of Medicine and Health Sciences, Community health<br>Mathews, C.; South African Medical Research Council, Health Systems Research Unit; University of Cape Town, Adolescent Health Research Unit<br>Nicol, Edward; South African Medical Research Council, Burden of Disease Research Unit, Tygerberg; Stellenbosch University, Faculty of Medicine and Health Sciences |
| <b>Primary Subject Heading</b>: | HIV/AIDS                                                                                                                                                                                                                                                                                                                                                                                                                                                                                                                                                                                                                                                                                                                                                                                                                                                                                                                                                                                                                                                                                                                                                                                                                                                                                                                                                                                                                                                                                                                                                         |
| Secondary Subject Heading:      | Public health                                                                                                                                                                                                                                                                                                                                                                                                                                                                                                                                                                                                                                                                                                                                                                                                                                                                                                                                                                                                                                                                                                                                                                                                                                                                                                                                                                                                                                                                                                                                                    |
| Keywords:                       | PUBLIC HEALTH, HIV & AIDS < INFECTIOUS DISEASES, Public health < INFECTIOUS DISEASES                                                                                                                                                                                                                                                                                                                                                                                                                                                                                                                                                                                                                                                                                                                                                                                                                                                                                                                                                                                                                                                                                                                                                                                                                                                                                                                                                                                                                                                                             |

1  
2  
3  
4  
5  
6  
7  
8  
9  
10  
11  
12  
13  
14  
15  
16  
17  
18  
19  
20  
21  
22  
23  
24  
25  
26  
27  
28  
29  
30  
31  
32  
33  
34  
35  
36  
37  
38  
39  
40  
41  
42  
43  
44  
45  
46  
47  
48  
49  
50  
51  
52  
53  
54  
55  
56  
57  
58  
59  
60



SCHOLARONE™  
Manuscripts

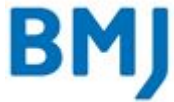

I, the Submitting Author has the right to grant and does grant on behalf of all authors of the Work (as defined in the below author licence), an exclusive licence and/or a non-exclusive licence for contributions from authors who are: i) UK Crown employees; ii) where BMJ has agreed a CC-BY licence shall apply, and/or iii) in accordance with the terms applicable for US Federal Government officers or employees acting as part of their official duties; on a worldwide, perpetual, irrevocable, royalty-free basis to BMJ Publishing Group Ltd ("BMJ") its licensees and where the relevant Journal is co-owned by BMJ to the co-owners of the Journal, to publish the Work in this journal and any other BMJ products and to exploit all rights, as set out in our [licence](#).

The Submitting Author accepts and understands that any supply made under these terms is made by BMJ to the Submitting Author unless you are acting as an employee on behalf of your employer or a postgraduate student of an affiliated institution which is paying any applicable article publishing charge ("APC") for Open Access articles. Where the Submitting Author wishes to make the Work available on an Open Access basis (and intends to pay the relevant APC), the terms of reuse of such Open Access shall be governed by a Creative Commons licence – details of these licences and which [Creative Commons](#) licence will apply to this Work are set out in our licence referred to above.

Other than as permitted in any relevant BMJ Author's Self Archiving Policies, I confirm this Work has not been accepted for publication elsewhere, is not being considered for publication elsewhere and does not duplicate material already published. I confirm all authors consent to publication of this Work and authorise the granting of this licence.

**Title**

Service delivery models that promote linkages to PrEP for adolescent girls and young women and men in sub-Saharan Africa: A scoping review

**Authors**

Witness Chirinda<sup>1</sup>; \*Trisha Ramraj<sup>2</sup>; Kim Jonas<sup>1,3</sup>; Darshini Govindasamy<sup>1,3</sup>; Ngcwalisa Jama<sup>4</sup>; Tracy McClinton Appollis<sup>1,3</sup>; Babalwa Zani<sup>4</sup>; Ferdinand Mukumbang<sup>4</sup>; Wisdom Basera<sup>4</sup>; Mbuzeleni Hlongwa<sup>4,5</sup>; Eunice Turawa<sup>4</sup>; Catherine Mathews<sup>1,3</sup>; Edward Nicol<sup>4,6</sup>

**Author Affiliations**

<sup>1</sup>Health Systems Research Unit, South Africa Medical Research Council, Cape Town, South Africa

<sup>2</sup>HIV Prevention Research Unit, South Africa Medical Research Council, Cape Town, South Africa

<sup>3</sup>Adolescent Health Research Unit, Division of Child and Adolescent Psychiatry, Faculty of Health Sciences, University of Cape Town, Cape Town, South Africa

<sup>4</sup>Burden of Disease Research Unit, South African Medical Research Council, Cape Town, South Africa

<sup>5</sup>School of Nursing and Public Health, University of KwaZulu-Natal, Durban, South Africa.

<sup>6</sup>Health Systems and Public Health Division, Faculty of Medicine and Health Sciences, Stellenbosch University, Cape Town, South Africa

**\*Corresponding author:** Trisha Ramraj, HIV Prevention Research Unit, South African Medical Research Council, 491 Peter Mokaba Road, Durban, 4093, South Africa.

*E-mail address:* [trisha.ramraj@mrc.ac.za](mailto:trisha.ramraj@mrc.ac.za)

## Abstract

**Background:** Pre-exposure prophylaxis (PrEP) is an emerging biomedical prevention intervention. Documenting PrEP service delivery models (SDMs) that promote linkage to and continuation of PrEP will inform guidelines and maximise roll out.

**Objectives:** To synthesize and appraise the effectiveness and feasibility of PrEP SDMs designed to promote linkage to PrEP care among adolescent girls and young women (AGYW) and men in sub-Saharan Africa (SSA).

**Eligibility criteria:** Primary quantitative and qualitative studies published in English and conducted in SSA were included. No restrictions on the date of publication were applied.

**Sources of evidence:** Methodology outlined in the Joanna Briggs Institute reviewers' manual was followed. PubMed, Cochrane library, Scopus, Web of Science, and online-conference abstract archives were searched.

**Charting methods:** Data on article, population, intervention characteristics and key outcomes was charted in REDCap.

**Results and Conclusion:** Of the 1204 identified records, 37 met the inclusion criteria. Health facility-based integrated models of PrEP delivery with family planning, maternal and child health or sexual and reproductive services to AGYW resulted in PrEP initiation of 16-90%. Community-based drop-in centres (66%) was the preferred PrEP outlet for AGYW compared to public clinics (25%) and private clinics (9%). Most men preferred community-based delivery models. Among individuals who initiated PrEP, 50% were men, 62% were <35 years old and 97% were tested at health fairs compared to home testing. Integrated antiretroviral therapy (ART)-PrEP delivery was favoured among serodiscordant couples with 82.9% of couples using PrEP or ART with no HIV seroconversions. PrEP initiation within healthcare facilities was increased by perceived client-friendly services and non-judgmental healthcare workers. Barriers to PrEP initiation included distance to travel to and time spent at health facilities and perceived community stigma. PrEP SDMs for AGYW and men need to be tailored to the needs and preferences for each group. Programme implementers should promote community-based SDMs to increase PrEP initiation among AGYW and men.

**Key words:** Pre-exposure prophylaxis, PrEP, linkage, adolescent girls, and young women, AGYW, men, sub-Saharan Africa

### Strengths and limitations of this study

- A comprehensive search strategy was developed, and the search was carried out across multiple databases and conference archives.
- The methodology used in the scoping review was robust and included double data screening, extraction, and synthesis.
- All included studies underwent critical appraisal of sources of evidence using approved tools.
- Studies not conducted in SSA and that were published in non-English languages were excluded.
- Most of the included studies were from Kenya, Uganda, and South Africa limiting the generalizability of the results.

### Background

Recent reports indicate a decline in new HIV infections globally. However, this decline is occurring at a slower pace in regions with generalized HIV epidemics such as sub-Saharan Africa (SSA). In 2017, SSA accounted for 64% of new HIV infections globally.<sup>1</sup> Two underserved populations that are critical to drive the decline in new HIV infections are adolescent girls and young women (AGYW; 15-24 years) and men (25-65 years). AGYW are at substantial risk for HIV-infection with an estimated 310 000 new infections globally in 2018 – 86% of which was in SSA.<sup>1</sup> Men, on the other hand, account for more AIDS-related deaths globally than women – 400 000 deaths in men in 2018 compared to 270 000 in woman.<sup>1</sup>

For differing reasons, AGYW and men show lower health seeking behaviour because of interpersonal and structural factors. AGYW's access to health services is limited by stigma, negative attitudes from healthcare workers and inconvenient clinic operating hours.<sup>2</sup> However, 'man unfriendly clinics' are characterised by inaccessible clinic hours/locations, difficulty in engaging with female staff, and gender norms that discourage men from accessing health services.<sup>3 4</sup>

Amongst the 2020 Global Prevention Targets and Commitments is the reduction in the number of AGYW newly infected with HIV globally to below 100 000, and to ensure that 3 million people at substantial risk of contracting HIV have access to pre-exposure prophylaxis (PrEP).<sup>5</sup> To achieve these targets, primary prevention programmes should be structured around five central pillars: (1) combination prevention for AGYW; (2) combination prevention with key populations; (3) voluntary medical male circumcision (VMMC) and sexual and reproductive health services (SRHS) for men and boys; (4) comprehensive condom

1  
2  
3 programmes; and (5) rapid introduction of PrEP.<sup>5</sup> PrEP for HIV refers to the use of  
4 antiretroviral drugs among HIV-negative people to prevent the acquisition of HIV.<sup>6</sup>  
5  
6

7 PrEP has shown effectiveness in reducing HIV acquisition among couples, sex workers, men  
8 who have sex with men (MSM), transgender and people who inject drugs and AGYW.<sup>7</sup> The  
9 impact of PrEP on the HIV epidemic depends on the extent of PrEP initiation among people  
10 at substantial risk for HIV infection (World Health Organization (WHO) defined substantial risk  
11 of HIV acquisition as HIV incidence of 3 per 100 person-years or higher in the absence of  
12 PrEP).<sup>7,8</sup> Since September 2015, the WHO recommended offering oral PrEP to every person  
13 at substantial risk of contracting HIV.<sup>7</sup> In the current South African guidelines for PrEP, specific  
14 populations considered to be at substantial risk of HIV infection include AGYW, MSM, people  
15 with more than one sexual partner, people who inject drugs, people with a recent history of  
16 sexually transmitted infections, people who recognise their own risk and request PrEP,  
17 serodiscordant couples if the HIV positive partner is not virally suppressed, and sex  
18 workers.<sup>9,10</sup>  
19  
20  
21  
22  
23  
24  
25

26 Literature on PrEP has largely been focused on knowledge, attitudes, and interest in PrEP. As  
27 countries scale up use of PrEP as part of their combination prevention packages, evidence on  
28 service delivery models (SDMs) that promote initiation and continuation on PrEP are needed  
29 especially among vulnerable and hard to reach populations such as AGYW and men. HIV  
30 prevention cascades have been proposed as a logical framework to monitor populations at  
31 substantial risk for HIV acquisition as they navigate the steps from HIV testing to assessing the  
32 risk of the individual to determining PrEP eligibility before PrEP initiation and continuation or  
33 discontinuation.<sup>8</sup> PrEP initiation (step 5) represents a critical step in the PrEP cascade (Figure  
34 1),<sup>8,10</sup> because it reflects people's awareness and interest in lowering their risk for HIV.  
35 Differentiated models, which are centred around clients' needs and expectations and  
36 relieving unnecessary burdens on the health system while targeting behavioural and  
37 structural determinants of AGYW and men, can potentially increase acceptability and  
38 accessibility of PrEP. These include innovative strategies that streamline HIV testing, link  
39 AGYW and men to HIV prevention services, provide differentiating medication access points,  
40 reduce stigma and barriers of parental consent for PrEP initiation.<sup>11</sup> PrEP SDMs should be  
41 designed with the populations being served central to the design.<sup>12</sup>  
42  
43  
44  
45  
46  
47  
48  
49  
50  
51  
52  
53  
54  
55  
56  
57  
58  
59  
60

[Insert Figure 1 here]

**Figure 1:** Oral PrEP cascade: *Adapted from Dunbar et al (2018)*<sup>8</sup>

Following an HIV-negative diagnosis (step 1), an individual is assessed for risk of HIV (step 2). An individual at substantial risk of HIV acquisition or who requests pre-exposure prophylaxis (PrEP) is assessed for eligibility for PrEP (step 3). After documenting eligibility for PrEP use, several baseline clinical investigations are conducted (step 4 PrEP is initiated (step 5) on the same-day as HIV testing. The recommended regimen is Tenofovir (TDF) / emtricitabine (FTC) 1 tablet by mouth daily. PrEP continuation visits (step 6) include: month 1, every 3 months. PrEP is discontinued (step 7) if the individual tests HIV positive, develops renal disease, is non-adherent, does not want or need PrEP, no longer meets eligibility criteria, or if there are safety concerns.

There is a gap in knowledge on the characteristics of AGYW and men who initiate PrEP compared to those who do not initiate PrEP. This information is critical for informing national policies and implementation guidelines for PrEP roll-out. As such, the aim of this review was to synthesize and appraise the effectiveness and feasibility of PrEP SDMs designed to promote linkage to care among AGYW and men eligible for PrEP in SSA. The objectives were to a) summarize SDMs that promote PrEP initiation and b) explore users' perceptions, and barriers and facilitators of these PrEP models.

## Methods

We used a scoping review design to map existing literature, explore the research studies conducted and identify research and knowledge gaps in models used to deliver PrEP.<sup>13</sup> Scoping reviews can be of particular use when the topic has not yet been extensively reviewed or is of a complex or heterogeneous nature.<sup>14</sup> The research question was defined using the Population- Intervention-Comparison-Outcome (PICO) framework (Table 1). We defined our outcomes as i) Linkage to PrEP care (defined as the proportion of AGYW or men who are initiated on PrEP following an HIV-negative diagnosis, step 7 of Figure 1) and ii) perceptions, barriers, and facilitators of PrEP SDMs. The service delivery model was defined as the setting used for delivery of PrEP viz. facility-only, community-only, research-only, mobile-only and a hybrid model encompassing two or more of the above settings.

**Table 1:** Scoping review population, intervention, and outcome

|              |                                                                                                                                                      |
|--------------|------------------------------------------------------------------------------------------------------------------------------------------------------|
| Population   | Heterosexual females (15-24 years) and men (25-65 years)                                                                                             |
| Intervention | Interventions (SDMs) designed to improve PrEP initiation                                                                                             |
| Comparison   | Not applicable                                                                                                                                       |
| Outcome      | Linkage to PrEP care (defined as the proportion of AGYW or men who are initiated on PrEP following a HIV-negative diagnosis) and perceptions on SDMs |



### Protocol and registration

This review was conducted and reported in line with the Joanna Briggs Institute (JBI) reviewer's manual and structured using the Preferred Reporting Items for Systematic Reviews and Meta-Analyses extension for scoping reviews (PRISMA-ScR).<sup>15 16</sup> A review protocol for this scoping review was registered with the Open Science Framework (DOI 10.17605/OSF.IO/EG9TD).

### Research ethics approval

The scoping review focuses on published research in the public domain therefore no ethics approval is required.

### Patient and public involvement

No patients or public were involved in the study.

### Eligibility criteria

We included primary studies on PrEP service delivery models for AGYW and men, with both qualitative and quantitative study designs published in English and conducted in SSA. No restrictions on the date of publication were applied. Table 2 details the inclusion criteria applied to studies. We excluded studies that were focused exclusively on key population groups in HIV programmes such as lesbian, gay, bisexual, MSM etc. and publication types (e.g., systematic reviews, case studies, etc).

**Table 2:** Eligibility criteria describing study inclusion criteria for the scoping review

|            |                                                                                                                                                                                                                                                                                  |
|------------|----------------------------------------------------------------------------------------------------------------------------------------------------------------------------------------------------------------------------------------------------------------------------------|
| Study type | Quantitative studies including randomized clinical trials (RCT), quasi-randomized, and non-RCTs, longitudinal observational (historical cohorts, prospective cohorts, case-control, and before-and-after studies), analytic cross-sectional studies, and non-comparative studies |
|            | Qualitative studies using any study design                                                                                                                                                                                                                                       |
| Population | Study population included heterosexual females (15-24 years) and males (25-65 years)                                                                                                                                                                                             |
| Outcomes   | Focus of research: PrEP SDMs i.e., service provision / implementation science / models of care / differentiated care / linkage to care / intervention                                                                                                                            |
|            | Papers reporting on barriers and facilitators of PrEP SDMs                                                                                                                                                                                                                       |
|            | Papers on user perceptions of PrEP SDMs                                                                                                                                                                                                                                          |
| Setting    | Sub-Saharan African countries – based on the World Bank's country classification <sup>17</sup>                                                                                                                                                                                   |

### Information sources and search strategy

PubMed, Cochrane library, Scopus, and Web of Science including three online conference archives (AIDS conference, Conference on Retroviruses and Opportunistic Infections and International AIDS Society Conference on HIV Science) were searched. The reference list of systematic reviews was checked to identify relevant primary studies. The three-step search strategy recommended by the JBI Reviewer's Manual was used.<sup>15</sup> During the first step, one author (WC) conducted an elementary search on PubMed to establish the volume of relevant articles on the topic. Two authors (WC and TR) then screened the title and abstract of the retrieved articles to identify keywords and index terms which were used to build a search strategy (see online supplementary appendix 1). The final search results were exported into EndNote,<sup>18</sup> and duplicates were removed.

### Selection of sources of evidence

Titles and abstracts were double screened in Rayyan<sup>19</sup> by any two of a group of eight independent authors (TR, WC, KJ, NJ, DG, TMA, MH, ET). There was no restriction placed on age range during the screening phase to ensure that articles with age disaggregated analysis were included. Full text articles and conference abstracts, including articles from the 2020 AIDS conference were retrieved and independently double screened by WC and TR.

### Data charting process and data items

Using a pre-designed data-charting form, key and relevant information were systematically extracted from full-text articles in REDCap<sup>20</sup> by any two of a group of ten independent authors (TR, WC, TMA, NJ, DG, BZ, CM, MH, ET, EN). We charted data on article characteristics, population characteristics, intervention characteristics, and key outcomes (Table 1).

### Critical appraisal of individual sources of evidence

Information for quality assessment was incorporated into the data charting form on REDCap.<sup>20</sup> Due to the different study designs and research methodologies adopted in the included studies, we used three different tools to appraise the articles. For comparative studies including randomised trials, non-randomised trials, interrupted time-series and controlled before-after-studies, we used the risk of bias criteria recommended by the Effective Practice and Organisation of Care (EPOC).<sup>21</sup> For qualitative studies, we used the Critical Appraisal Skills Programme (CASP) checklist.<sup>22</sup> For other studies we used the Ways of Evaluating Important and Relevant Data (WEIRD) tool.<sup>23</sup> Modelling studies were excluded from the appraisal step.

### Analysis

For quantitative studies we used a narrative analysis and tabulated data by gender and by SDM. We summarized the settings, populations, and sample for each group, along with the interventions and findings. For qualitative studies, we did a thematic analysis that resulted in

1  
2  
3 organising the data into themes, authors' interpretations, and quotes and integrated these  
4 findings to support the quantitative data. We tabulated the data by SDMs (health facility,  
5 community, research, or mobile) and by population (AGYW only, men only, or models for  
6 both). Furthermore, we determined the existing gaps in the different categories of  
7 interventions that can be strengthened to promote initiation and continuation on PrEP among  
8 AGYW and men.  
9  
10  
11

## 12 13 **Results**

### 14 **Selection of sources of evidence**

15 Our search identified 1604 citations. After duplicates (413) were removed, a total of 1204  
16 titles and abstracts were identified from searches of electronic databases and 13 from other  
17 sources including conferences. The PRISMA flow diagram (Figure 2) illustrates the screening  
18 process to identify records that meet the study inclusion criteria. Based on the screening of  
19 title and abstracts, 1102 records were excluded, with 102 full text articles and conference  
20 abstracts to be retrieved and assessed for eligibility. From the review of full text articles 67  
21 were excluded for the following reasons: editorials/commentaries/reviews/protocols,  
22 interviews with stakeholders, articles on topical PrEP, wrong outcome and focus on key  
23 populations. During data charting, two additional articles were excluded. Four additional  
24 articles were added after the initial search process, these articles were identified following  
25 the 2020 AIDS conference in July. The final number of studies that were considered eligible  
26 for this scoping review were 37 (27 studies and 10 conference abstracts).  
27  
28  
29  
30  
31  
32  
33  
34

35 **[Insert Figure 2 here]**

### 36 **Figure 2:** PRISMA flow diagram

37 Adapted from: Moher et al<sup>24</sup>

### 38 **Description of sources of evidence**

39 A description of the characteristics, setting, SDMs and intervention modalities of the included  
40 studies are provided in online supplementary appendix 2. There was a mixture of quantitative  
41 (n=23), qualitative (n=11) and mixed method studies (n=3). Most studies were  
42 demonstration/IS projects (n=10) while other methodological approaches included  
43 randomised controlled trials (RCTs) (n=5) and cross-sectional studies (n=5). Most were  
44 conducted in Kenya (n=17), with the remainder conducted in Uganda (n=10), South Africa  
45 (n=10), Tanzania (n=3), Malawi (n=2), Mozambique (n=2), and Zimbabwe (n=1). These studies  
46 reported evidence on the following PrEP SDMs; health facility (6), mobile (1), research site  
47 (8), community (6), hybrid (10), and not described/not applicable (6). Thirteen studies focused  
48 on AGYW, 19 studies focused on AGYW and men, one study focused on men only, and four  
49 were classified as other (i.e., age categories were not specified). PrEP services were offered  
50 in 25 of the 37 studies whilst PrEP perceptions/opinions were assessed in the other 12 studies.  
51  
52  
53  
54  
55  
56  
57  
58  
59  
60

### Critical appraisal of evidence

Full text articles appraised using the WEIRD tool were mostly assessed as having either no or very minor or moderate concerns for items that were unclear in the article (see online supplementary appendix 3). Most of the qualitative studies or abstracts performed well on all items except on items 4 (the recruitment strategy was appropriate to the aims), 8 (the rigour of the data analysis) and 10 (the value of the research in terms of its contribution to the literature and/or policy and process). Due to limited information in the abstracts to clearly answer the items using the WEIRD tool, most of the abstracts were appraised as either having an unclear or serious risk of bias.<sup>25-30</sup>

### Results of sources of evidence

#### PrEP SDMs for AGYW

Amongst AGYW, PrEP SDMs were found in HF-B (n=6), hybrid (mobile clinic-healthcare facility or community-healthcare facility, n=3), research site (n=2) and mobile clinic (n=1) (see online supplementary appendix 2).

#### Health facility

Three studies from Kenya evaluated a HF-B delivery modality by integrating PrEP delivery into routine services. Mugwanya et al.<sup>31</sup> evaluated a PrEP-dedicated nurse-led integrated delivery of PrEP in family planning (FP) clinics whilst Kinuthia et al. and Pintye et al. evaluated approaches to integrate PrEP into maternal and child health (MCH) clinics providing antenatal care (ANC) and post-natal care (PNC).<sup>32 33</sup> Integration of universal screening and counselling for PrEP in FP and MCH clinics resulted in PrEP initiation of 16% and 49.2% respectively among AGYW. Younger women ( $\leq 24$  years) who initiated PrEP at MCH clinics were significantly more likely to return for a PrEP refill at month 3 compared to women  $>24$  years (54.9% versus 45.1%) ( $p=0.05$ ).<sup>32</sup> These studies utilised nurses dedicated to providing PrEP services only, which may limit applicability in a sub-Saharan setting where facilities have a limited clinical workforce. A study by Ngunjiri et al. which integrated PrEP with FP services found that PrEP dispensation was more frequent among those concurrently using effective contraception, (adjusted relative risk [aRR]=1.19; 95% confidence interval [CI]=1.08-1.32) and contraceptive use was more common among those on PrEP (aRR=1.63; 95% CI=1.18-2.25), highlighting the importance of SDMs that integrate PrEP with FP services.<sup>34</sup> Pintye et al. found that participants who initiated PrEP at MCH clinics took an additional 18 minutes for PrEP related activities over and above the time spent at the clinic to receive routine MCH services. The additional time could deter AGYW from initiating and continuing PrEP and depending on healthcare facility size and patient volume integrating PrEP into these routine services could result in several additional hours of work for nurses.<sup>33</sup> A recent study in Malawi comparing four SDMs (Model 1: standard of care, Model 2: integrated youth-friendly services, Model 3: Model 2 plus a small-group behavioural intervention, and Model 4: Model 3 plus cash transfer) found that PrEP initiation will best be promoted in youth-friendly locations such as

1  
2  
3 schools because of ease of access and comfort in the absence of adult patients and family  
4 members.  
5

#### 6 Hybrid (community-health facility)

7 Two studies evaluated the scaling up of PrEP in Kenya through integration into routine health  
8 services in drop-in centres (DICES), public and private health facilities designed primarily for  
9 sex workers.<sup>28 35</sup> Ongwen et al. reported that within the context of the Jilinde project, which  
10 implements oral PrEP as a routine service at a public health scale in Kenya, 6.5% (n=1851)  
11 AGYW initiated PrEP, and DICES were the preferred PrEP outlet for adolescent girls with 66%  
12 accessing services in DICES, 25% in public clinics and 9% in private clinics. Amongst AGYW who  
13 initiated PrEP, the entry channel into the PrEP pathway was through peer educators and  
14 networks (50%); community outreaches (20%); and within health facilities (30%).<sup>28</sup> Were et  
15 al. found that among all individuals eligible for PrEP in the study which included female sex  
16 workers and MSM, 11% of AGYW initiated PrEP.<sup>35</sup> The majority (81%) of clients initiated PrEP  
17 through DICES, whereas 14% and 5% were initiated through public and private facilities  
18 respectively. The majority of AGYW did not persist on PrEP use at month-1 (68% drop off) and  
19 month-3 (94% drop off) follow-ups. Qualitative evidence from this study found that AGYW  
20 who initiated PrEP in public and private health facilities reported insensitive referral and  
21 access to the PrEP delivery pathways where "*The (HIV) testing place is different from the place*  
22 *I was asked questions and the place for collecting the medicine is also different. We took long*  
23 *because we were walking form one place to another*".<sup>35</sup>  
24  
25  
26  
27  
28  
29  
30  
31  
32

#### 33 Research site

34 Delany-Moretlwe conducted an RCT in Tanzania and South Africa to evaluate whether  
35 empowerment clubs increased PrEP initiation and continuation among AGYW. Participants  
36 were randomised to the standard of care (SoC), which included comprehensive SRHS, with  
37 counselling and short message service (SMS) reminders for PrEP users, or to empowerment  
38 clubs plus SoC. Facilitators-led small group sessions and clinic follow-up visits for sexually  
39 active AGYW on PrEP. Across both arms, 97% initiated PrEP. PrEP continuation did not vary  
40 significantly by study arm and diminished with time (73% at Month-1, 61% at Month-3 and  
41 34% at Month-6).<sup>36</sup> Donnell et al. found that HIV incidence declined significantly after on-site  
42 provision of PrEP at the research sites.<sup>37</sup> Hill et al. found that epidemiologic HIV risk scores  
43 were positively associated with PrEP interest, and that high numbers of AGYW both above  
44 and below the high-risk cut-off were very interested in PrEP (68% vs. 63%).<sup>38</sup>  
45  
46  
47  
48  
49  
50

#### 51 Mobile

52 A South African study found that integrating PrEP with SRHS and delivering it via an  
53 adolescent-friendly mobile clinic led to an increase in both PrEP initiation and contraception.  
54 AGYW who were using contraception were significantly more likely to initiate PrEP (76%) on  
55 the same-day compared to those who were not using contraception and declined PrEP (66%)  
56 (p=0.001). Contraception was initiated by 44% of AGYW on the same-day as PrEP initiation  
57  
58  
59  
60

1  
2  
3 compared to 30% who declined PrEP ( $p=0.003$ ).<sup>29</sup> No qualitative evidence on the acceptability  
4 and feasibility of mobile delivery models were identified.  
5  
6

### 7 **Overall perceptions of SDMs by AGYW**

8  
9 In a study conducted in Malawi, Maseko et al found high levels of hypothetical PrEP  
10 acceptability among AGYW who reported that interest in PrEP depends on confidential access  
11 and discrete packaging (cartons or bottles that resemble treatment for common ailments) of  
12 the drug. Moreover, AGYW reported that youth-friendly delivery modalities such as schools  
13 and youth-friendly sections of health centres that provide “...a place for the youths to be  
14 comfortable getting these drugs...” may facilitate the initiation of PrEP as a prevention  
15 strategy.<sup>39</sup>  
16  
17  
18  
19

### 20 **PrEP SDMs for men**

21 We found one mixed method study among young South African men. PrEP was not provided,  
22 but hypothetical perceptions, barriers and enablers of PrEP initiation were assessed. Whilst  
23 only 11% of men were aware of PrEP, 62% reported that they were very likely to take it. The  
24 young men preferred to keep PrEP use a secret from their partners, friends, and family. PrEP  
25 initiation was also dependent on the SDM used. Receiving PrEP from the clinic was reported  
26 as a barrier to PrEP usage as this could incite community stigma. Young men reported that  
27 “...they (community) would immediately think that you are HIV positive already, not that you  
28 are taking the prevention one...”  
29  
30  
31  
32  
33

### 34 **PrEP SDMs for AGYW and men**

35 We found 19 studies that assessed various SDMs for linkages to PrEP for AGYW and men.  
36 Amongst AGYW and men, PrEP SDMs included hybrid (research site-healthcare facility or  
37 community-healthcare facility,  $n=8$ ), community ( $n=5$ ) and research site ( $n=6$ ). These studies  
38 either recruited serodiscordant couples or included AGYW and men as individual participants.  
39  
40  
41  
42

### 43 Hybrid

44  
45 We identified seven studies that used a hybrid model to deliver PrEP.<sup>40-46</sup>  
46  
47

48 One study from Kenya and Uganda by Heffron et al. involved a hybrid (research site- health  
49 facility) model that integrated PrEP delivery into antiretroviral therapy (ART) treatment  
50 services for high-risk HIV serodiscordant couples.<sup>40</sup> The intervention was mainly couples-  
51 based and involved HIV prevention counselling; safer conception counselling or  
52 contraceptives; counselling and HIV testing for HIV-negative partner; PrEP  
53 initiation/prescription; and referral to a local health facility for the HIV infected partner for  
54 ART. The results showed high uptake of integrated PrEP and ART with an estimated 96%  
55 reduction in HIV incidence (82.9% of couples used PrEP or ART and there were no HIV  
56 seroconversions, 14.5% used some ART and/or PrEP and 2.6% used neither PrEP nor ART).<sup>40</sup>  
57  
58  
59  
60

1  
2  
3 Qualitative evidence that explored HIV serodiscordant couple's decision-making and  
4 motivations to initiate PrEP through this integrated ART-PrEP approach showed that a positive  
5 clinical encounter with a healthcare provider and client-friendly services played a critical role  
6 in the couple's decisions to initiate and continue PrEP.<sup>45</sup> Clear messaging, in-depth  
7 counselling and friendly, non-judgmental/stigmatizing services provided by healthcare  
8 workers empowered, reassured and promoted PrEP initiation among HIV serodiscordant  
9 couples with some describing it as "*service beyond the medicine*".<sup>45</sup> Furthermore, being at a  
10 place where service is offered to both couple (ART for the HIV positive partner and PrEP for  
11 the HIV-negative partner) motivated their decision.<sup>45</sup>  
12  
13  
14  
15  
16

17 Five studies used a hybrid mobile testing approach implemented at community health fairs,  
18 home, or local health facility.<sup>26 41-44</sup> Two studies from Kenya and Uganda showed that PrEP  
19 initiation was high (>75%) among individuals who received HIV testing on the same-day.<sup>41 43</sup>  
20 Mayer et al. found that 39% of participants initiated PrEP within 4 weeks of the community  
21 health campaign.<sup>42</sup> However, the distance between the participants and the healthcare  
22 provider influenced PrEP initiation.  
23  
24  
25  
26

27 Koss et al. and Camlin et al. who explored barriers influencing PrEP initiation using the hybrid  
28 (community-health facility) model,<sup>26 44</sup> found that PrEP initiation was hindered by HIV/ART-  
29 related stigma which emanated from the colour of the pill being the same as HIV treatment  
30 regimens, and access of PrEP services at the same facility where HIV care is provided.<sup>44</sup> Men  
31 reported that the "*... majority of us fear to go to the health center...*" and suggested  
32 alternatives such as designating a clinic day for PrEP or "*...distribute [PrEP] to the people...*".  
33 Participants reported that healthcare workers should deliver PrEP or find delivery methods  
34 that are easily accessible by the community "*...just like they did with condoms.*" Young adults  
35 who attended school outside the community could not initiate PrEP given that PrEP was only  
36 provided within study communities. Furthermore, school attendance made initiating and  
37 continuing PrEP challenging.<sup>26 44</sup>  
38  
39  
40  
41  
42  
43

#### 44 Community

45 Two South African studies conducted in a community setting explored the hypothetical  
46 opinions of PrEP among salon owners, stylists, and clients.<sup>47 48</sup> Ninety-five percent of owners  
47 and stylists and 77% of clients were comfortable with PrEP being offered at hair salons,<sup>48</sup>  
48 which provide a geographically convenient and conducive environment for receiving health  
49 services.<sup>47 48</sup> A third community-based study which used a 90-second PrEP demand creation  
50 video and informational brochures, found that 68% and 56% of young women respectively  
51 reported that they were definitely interested in learning more about and initiating PrEP. The  
52 study also found that young women preferred realistic visuals that they could identify with,  
53 rather than highly stylized models. Data evaluated by Lubwama et al. showed that 69.2% of  
54 key populations which included AGYW and serodiscordant couples were reached through  
55 drop-in centres and community-based outreach centres providing PrEP versus fixed public  
56  
57  
58  
59  
60

1  
2  
3 health facilities.<sup>49</sup> The proportion that returned for PrEP was higher among serodiscordant  
4 couples (3 months: 56.9%, 6 months: 46.8%) compared to sex workers (3 months: 37.5%, 6  
5 months: 26.3%).  
6  
7

### 8 9 Clinical Research Site

10 In three of the six studies conducted at a clinical research site,<sup>27 40 50-54</sup> PrEP was integrated  
11 with ART or with ART and other interventions such as VMMC.<sup>40 51 52</sup> Across the three studies,  
12  $\geq 95\%$  of the HIV-negative partner within serodiscordant couples initiated PrEP. The use of  
13 PrEP in combination with ART or other prevention interventions (VMMC) or conception  
14 strategies resulted in reduced HIV incidence. Serodiscordant couples found that the “couples-  
15 focused” services provided through the integrated PrEP-ART strategy strengthened their  
16 relationships. Serodiscordant couples found that the “couples-  
17 focused” services provided through the integrated PrEP-ART strategy strengthened their  
18 relationships.  
19

### 20 21 **Overall perceptions of SDMs by AGYW and men**

22 Several studies explored factors that influence PrEP initiation, non-initiation and  
23 discontinuation in individuals who received PrEP through the different SDMs.<sup>26 27 44-46 54</sup>  
24 Motivators to initiate PrEP included: perception of high-risk, preference of PrEP over other  
25 HIV prevention methods, protection from unwanted/forced sexual encounters, love for one's  
26 partner, knowledge about PrEP and the belief it is effective, partner support belief that PrEP  
27 supported life goals and a positive clinical encounter.<sup>26 27 44-46 54 55</sup> Females preferred a product  
28 that was delivered at a health clinic over accessing it at a pharmacy.<sup>56</sup> Barriers to PrEP  
29 initiation included daily pill burden, side effects, mixed dosing messaging, living with parents  
30 or attending school, partners consent or partners reaction to use and HIV-related stigma.<sup>26 27</sup>  
31  
32  
33  
34  
35 44-46 54 55  
36  
37

### 38 39 **Other models**

40 We identified four other studies that explored other methods of promoting PrEP initiation  
41 among AGYW and men.<sup>57-60</sup> Jani et al. explored male partners support for hypothetical PrEP  
42 use by AGYW.<sup>59</sup> Male partners highlighted that their support would be contingent on their  
43 early involvement in the decision-making process regarding PrEP which would alleviate  
44 suspicion of infidelity. AGYW suggested that not including male partners may result in social  
45 harms (partner violence, dissolution of relationships). Strategies recommended by male  
46 partners included couples counselling, educating, and providing PrEP to men and community  
47 sensitization. Makyao et al. explored parental support of AGYW's hypothetical use of PrEP.  
48 Parents supported PrEP availability acknowledging the risks faced by AGYW.<sup>60</sup> However,  
49 support was also influenced by social norms (promoting promiscuity or condoning sexual  
50 activity). Differential parenting roles influenced the type of support: mothers suggested  
51 providing a conducive environment (good diet) for PrEP use whilst fathers suggested  
52 providing operational support (transport money). Cremin et al. and Irungu et al. reported that  
53 providing time-limited PrEP during periods of increased exposure would be a novel, efficient  
54 and cost-effective strategy for providing PrEP.<sup>57 58</sup>  
55  
56  
57  
58  
59  
60



## Discussion

The purpose of this review was to synthesize and appraise the effects on PrEP initiation and the acceptability and feasibility of PrEP SDMs designed to promote linkage to care among AGYW and men eligible for PrEP in SSA. Given the challenging interactions between AGYW and men and the health system, we reviewed evidence of PrEP initiation in a range of SDMs i.e., health facility-, mobile-, community- based or hybrid models, and we explored the perceptions, barriers, and facilitators of these models. This scoping review identified 27 primary studies and 10 conference abstracts.

Delivery of PrEP to AGYW included HF-B models which integrated PrEP into routine FP/MCH/SRH/ANC services, hybrid models which allowed AGYW to initiate PrEP either at community-based venues or private or public facilities and mobile models. Whereas integrated models provided at a public health facility offer a potential “one-stop” location for AGYW to initiate PrEP whilst accessing other services, the additional time spent on PrEP-related activities may deter AGYW from initiation. Roche et al found in a study on integrated PrEP-FP service delivery that youth-friendly clinics are “low-hanging fruit” for PrEP delivery. The youth friendly approach and clinic flow implemented at one of the clinics required less room-to-room movement thus making PrEP delivery to AGYW easier. The second clinic which offered PrEP like any other outpatient service, with clients receiving HIV testing services at HTS points, PrEP counselling and clinical review in consultation rooms, and prescription dispensing at the pharmacy was not favoured by AGYW who did not want to queue at each service point and discuss their sexual activity in crowded FP consultation rooms.<sup>61</sup> Integrated delivery of PrEP provides an opportunity to respond to potential syndemics in AGYW who are eligible for PrEP; however, we found mixed results regarding the effectiveness of integrated models on PrEP initiation. Two studies in which PrEP was initiated in an FP or MCH clinic showed PrEP initiation of <50% with initiation being higher in women >24 years.<sup>31 32</sup> A third multi-country study which integrated PrEP with SRHS at FP clinics showed 90% PrEP initiation.<sup>30</sup> These studies were primarily implementation studies without a comparator, and PrEP related activities were provided by a PrEP-dedicated nurse. This task-shifting strategy removed this additional service from the workload of already overburdened routine nurses; however, the feasibility of this approach requires further evaluation considering the human resources challenges in SSA. Integration of HIV services and other health services has shown to be a useful strategy to improve linkage to HIV care, ART initiation and viral suppression. The most common forms of integration were (i) HIV testing and counselling added to non-HIV services and (ii) non-HIV services added to antiretroviral therapy (ART). The most commonly integrated non-HIV services were maternal and child healthcare, tuberculosis testing and treatment, primary healthcare, family planning, and sexual and reproductive health services.<sup>62</sup> Innovative adaptations are needed at public primary health facility level to overcome PrEP delivery challenges and barriers that are faced by users and staff. Irungu et al reported adaptations within integrated models such as fast tracking PrEP users to minimise

1  
2  
3 waiting times and clinicians dispensing PrEP from clinical rooms which removed waiting times  
4 at the pharmacy and mitigated any stigma associated with being seen at a pharmacy that  
5 mainly dispenses ART.<sup>63</sup>  
6  
7

8  
9 Adolescent-friendly clinics or adolescent-friendly sections within health facilities were also  
10 shown to promote initiation of PrEP.<sup>29 30 39</sup> However, a New York study of adolescents' PrEP  
11 awareness showed that 86% of adolescents eligible for PrEP reported never being informed  
12 about PrEP by their healthcare professionals.<sup>64</sup> Taggart et al. found that provider attitudes  
13 and recommendations within a healthcare facility influence adolescents' willingness or  
14 unwillingness to use PrEP.<sup>65</sup> Our results show that AGYW favour community-based youth-  
15 friendly delivery modalities of PrEP such as DICEs or schools over delivery via public and  
16 private health facilities. These findings concur with other studies which have shown that  
17 factors that influence US women's decision-making about the use of PrEP include the ease of  
18 accessing services and medication close to their homes.<sup>66 67</sup> Moreover, women highlighted  
19 the importance of community peers in influencing their decisions to initiate PrEP.<sup>67</sup>  
20  
21  
22  
23  
24  
25

26 We identified only one study among young, heterosexual men that explored the hypothetical  
27 perceptions of PrEP initiation. Men reported that if PrEP was available, they would use it.  
28 However, initiation was dependent on SDM and a HF-B model was not favoured due to  
29 community stigma.<sup>25</sup> Heterosexual men are not classified as a key or vulnerable population in  
30 the HIV prevention response, as such research that focuses on PrEP initiation or SDMs among  
31 heterosexual men is limited. Increasing the engagement of men with health services requires  
32 an understanding of the structural barriers that limit their access and requires targeted and  
33 adaptive interventions to meet the needs of men. Differentiated service delivery models (for  
34 example facility-based and/or community-based adherence clubs and quick pharmacy pick-  
35 up) has been shown to improve uptake and retention of men in HIV treatment services.<sup>68</sup>  
36 Gender-transformative interventions such as "One Man Can", a rights-based gender equality  
37 and health programme intervention, and Decentralized Medication Delivery (DMD) have also  
38 shown success in reducing masculinity-related barriers to engaging in HIV prevention  
39 services.<sup>69</sup> A recent study conducted in South Africa revealed that these differentiated service  
40 delivery models have the potential to increase adherence to medication among men in  
41 particular.<sup>70</sup> Other interventions/ models designed to help South African men initiate ART and  
42 remain in care such as the MINA and Coach Mpilo campaigns, which provide men with  
43 information and support that help them to get tested for HIV, to initiate and remain in care,  
44 could also be used to promote PrEP initiation among men.<sup>71 72</sup>  
45  
46  
47  
48  
49  
50  
51

52 In studies that targeted both women (including AGYW) and men, SDMs included a hybrid  
53 approach (research site-community or community-health facility), community-based models  
54 and those based at research sites. PrEP delivery to serodiscordant couples involved integrated  
55 models such as delivery of PrEP and ART to serodiscordant couples allows both partners to  
56 interact with the health system. In such models, PrEP is initiated and continued only until the  
57 HIV infected partner achieves viral suppression which may be a cost-effective approach if viral  
58 suppression is achieved timeously.<sup>40</sup> However, in a sub-Saharan setting where <65% of people  
59  
60

1  
2  
3 living with HIV have suppressed viral load (VL) (<1000 copies/mL) and there are health  
4 systems challenges with VL testing and turn-around-time, integrated delivery of PrEP and ART  
5 may not be feasible.<sup>1 73</sup> Our findings have shown that community-based models which involve  
6 same-day HIV testing and PrEP initiation are favourable especially among men.<sup>43</sup>  
7 Furthermore, the delivery of PrEP through innovative community-based venues such as hair  
8 salons which provided a comfortable and familiar environment yielded high interest in PrEP  
9 initiation.<sup>47</sup> Many participants reported the convenience of pharmacies located close to public  
10 transport routes, as many did not have access to cars or did not want to bear the cost of fuel  
11 incurred travelling to the clinic.<sup>74</sup>  
12  
13  
14  
15

16 Both AGYW, men and serodiscordant couples have expressed that PrEP initiation is influenced  
17 by the setting i.e., a friendly environment and by the attitude of healthcare workers i.e., non-  
18 judgmental/non-stigmatizing.<sup>30 45</sup> This suggests that the successful delivery of PrEP to AGYW  
19 or men using HF-B models either through integrated or standalone approaches requires  
20 healthcare workers to play an essential role.<sup>75 76</sup> Structural barriers to PrEP initiation included:  
21 the distance to travel to and time spent at health facilities. To address these barriers, there  
22 is an increasing need for differentiated SDMs that provide alternative access options  
23 especially considering that PrEP is a prevention intervention delivered to individuals who are  
24 generally of good health and who may be disinclined to travel long distances and wait in long  
25 queues to access PrEP.<sup>77</sup>  
26  
27  
28  
29  
30

### 31 *Policy and programme recommendations and future research areas*

32  
33 Notably, literature on PrEP SDMs for AGYW and more especially heterosexual men is limited  
34 thus calling for more research in these areas. In order to increase PrEP initiation, country  
35 programme implementers need to understand which SDM/s work for AGYW or men and to  
36 adapt these to best suit the unique needs of the users.<sup>78</sup> Opportunities exist for integrated  
37 strategies of PrEP delivery at a health facility or mobile clinic. However, we need to  
38 understand which integrated strategy (e.g., integration with ART, SRHS, or contraceptive  
39 services) is most acceptable and scalable for AGYW and men. Further research is needed  
40 among couples where one partner is on PrEP, to understand if the perception of risk changes  
41 in the partner who is not on PrEP. We identified only one conference abstract that targeted  
42 PrEP SDM among heterosexual men. This study was also limited as PrEP was not provided,  
43 but hypothetical perceptions of PrEP were assessed. This dearth of published literature  
44 highlights a major gap in the knowledge with considerably more research needed to  
45 investigate SDMs among men. Training and retraining of healthcare workers on PrEP  
46 guidelines is essential to equip them with the skills to ensure that PrEP is delivered in a friendly  
47 and safe space by non-stigmatizing healthcare workers. To mitigate the time burden and  
48 travel expenses incurred by AGYW and men, same-day initiation of PrEP to those eligible and  
49 multi-months dispensing of refills should be considered.<sup>11 77 79</sup>  
50  
51  
52  
53  
54  
55

56 Furthermore, task-shifting among healthcare workers along the PrEP cascade will avoid  
57 additional burden on the health system. Further studies are required to evaluate the  
58 feasibility of PrEP-dedicated nurses. Differentiated SDMs are needed to take PrEP to where  
59  
60

1  
2  
3 users live, socialise and work.<sup>11</sup> These models include home deliveries, pharmacies, DICEs,  
4 salons, mobile clinics and tele-medicine-assisted models in both the public and private health  
5 sectors. Mobile clinics near schools could be successful but need to be regular, reliable, and  
6 sustainable. Furthermore, considering that eligibility for continuation on PrEP requires repeat  
7 HIV testing, there is a need for interventions (e.g., HIV self-testing) to address this challenge  
8 when PrEP is delivered at non- HF-B settings.  
9  
10

### 11 12 **Strengths and limitations**

13  
14 The strengths of this review include the inclusion of multiple databases across disciplines and  
15 broad inclusion criteria. We also used a comprehensive search strategy that followed the JBI  
16 reviewer's manual and structured using PRISMA-ScR guidelines, and robust methods that  
17 included double data screening, extraction, and review. Another strength is that we included  
18 grey literature and unpublished reports which minimizes the chances of missing studies with  
19 negative or null findings.  
20  
21  
22

23  
24 Limitations include the exclusion of studies conducted in non-SSA and that were published in  
25 non-English languages. In addition, due to a lag in adding and indexing articles in various  
26 online databases, our review could fail to locate the most recent publications and research  
27 on SDMs for PrEP initiation. Another limitation was that most of the included studies were  
28 from three countries (Kenya, Uganda, and South Africa) hence the generalisability of the  
29 results to SSA might be limited. Furthermore, there were limitations in the sources of  
30 evidence as many of the studies evaluated the hypothetical perceptions of PrEP initiation and  
31 some of the feasibility and acceptability is theoretical which may not translate to actual  
32 realities. Also, the extraction focuses on synthesizing the setting where PrEP is offered, which  
33 is only one component of the SDM and does not focus on other components such as the  
34 strategies or individuals providing PrEP. Due to the dearth of literature on SDMs among AGYW  
35 and men and considering that PrEP roll out in this population in many SSA countries has only  
36 recently been maximised, we included research studies to understand the SDMs in this  
37 setting. Although the recruitment criteria in a research setting may have resulted in a higher  
38 initiation of PrEP, the lessons learnt from this setting could contribute to improving the roll  
39 out of PrEP in AGYW and men. Critical appraisal of evidence from conference abstracts was  
40 limited by the information provided in the abstract. As such, many items for conference  
41 abstracts on the CASP tool were adjudicated as can't tell or unclear risk.  
42  
43  
44  
45  
46  
47  
48  
49

### 50 **Conclusions**

51  
52 We conducted a scoping review on PrEP SDMs, summarising evidence on PrEP initiation using  
53 existing models among AGYW and men and explored the users' perceptions, and barriers and  
54 facilitators of these PrEP models. These models were mostly found to be hybrid approaches  
55 (research site-health facility or community-health facility), community-based or based at a  
56 research site. Community-based models at convenient locations were favoured by AGYW.  
57 Integrated strategies delivered at friendly health facilities by non-stigmatising healthcare  
58 providers was also a preferred PrEP delivery channel. The successful initiation of PrEP by  
59  
60

1  
2  
3 AGYW and men will be dependent on the service setting where it is offered and cannot be  
4 considered as a one size fits all approach. Care must be taken to find the delivery method best  
5 suited to each sub-population. Future research should focus on what differentiated SDMs  
6 work for AGYW and heterosexual men to identify which approach is most successful in  
7 improving PrEP initiation and to understand their individual needs when using these models.  
8  
9

### 10 11 12 **Funding**

13 This work was supported by the U.S. President's Emergency Plan for AIDS Relief (PEPFAR)  
14 through the Centers for Disease Control and Prevention, under the terms of Cooperative  
15 Agreement Number 1 NU2GGH002193-01-00.  
16  
17

### 18 19 20 **Disclaimer**

21 The findings and conclusions in this manuscript are those of the authors and do not  
22 necessarily represent the official position of the US Centers for Disease Control and  
23 Prevention.  
24  
25

### 26 27 28 **Author Contributions:**

29 All authors contributed to conceptualising and designing the study. WC and TR conducted the  
30 literature search. WC, TR, KJ, NJ, DG independently performed screening. WC, TR, CM, EN, ET,  
31 MH, TMA, NJ, DG, BZ, WB and FM independently performed data extraction. EN developed  
32 the data charting form on REDCap. WC and TR performed initial data synthesis and  
33 interpretation and all authors refined it. WC and TR drafted the manuscript. All authors  
34 contributed to writing and reviewing the manuscript.  
35  
36  
37

38  
39 **Competing Interests:** None declared

40  
41 **Patient consent for publication:** Not required

42  
43 **Data availability statement:** All data relevant to the study are included in the article or  
44 uploaded as supplementary information.  
45

46  
47 **Ethics Approval:** The scoping review focuses on published research in the public domain  
48 therefore no ethics approval is required.  
49  
50  
51  
52  
53  
54  
55  
56  
57  
58  
59  
60

## References

1. UNAIDS. AIDSinfo 2020 [cited 2020 21 April]. Available from: <https://aidsinfo.unaids.org/> accessed 21 April 2020.
2. UNAIDS. We've got the power: Women, Adolescent girls and the HIV response 2019 [cited 2020 21 April]. Available from: [https://www.unaids.org/sites/default/files/media\\_asset/2020\\_women-adolescent-girls-and-hiv\\_en.pdf](https://www.unaids.org/sites/default/files/media_asset/2020_women-adolescent-girls-and-hiv_en.pdf) accessed 21 April 2020.
3. Pascoe L, Peacock D, Stemple L. Reaching men: addressing the blind spot in the HIV response. *Int J Mens Soc Comm Health* 2018;1(SP1):e57-e70.
4. Colvin CJ. Strategies for engaging men in HIV services. *Lancet HIV* 2019
5. UNAIDS. HIV prevention 2020 road map. Geneva: Joint United Nations Programme on HIV2017 [cited 2020 21 April]. Available from: [https://www.unaids.org/sites/default/files/media\\_asset/hiv-prevention-2020-road-map\\_en.pdf](https://www.unaids.org/sites/default/files/media_asset/hiv-prevention-2020-road-map_en.pdf) accessed 21 April 2020.
6. World Health Organization. Guidance on Pre-exposure oral prophylaxis (PrEP) for serodiscordant couples, men who have sex with men and transgender women at high risk of HIV. Geneva: World Health Organization, 2012.
7. World Health Organization. Consolidated guidelines on the use of antiretroviral drugs for treating and preventing HIV infection: recommendations for a public health approach. Geneva Switzerland: World Health Organization 2016.
8. Dunbar MS, Kripke K, Haberer J, et al. Understanding and measuring uptake and coverage of oral pre-exposure prophylaxis delivery among adolescent girls and young women in sub-Saharan Africa. *Sex Health* 2018;15(6):513-21.
9. Ajayi AI, Mudefi E, Yusuf MS, et al. Low awareness and use of pre-exposure prophylaxis among adolescents and young adults in high HIV and sexual violence prevalence settings. *Medicine* 2019;98(43)
10. Department of Health South Africa. Guidelines for Expanding Combination Prevention and Treatment Options: Oral Pre-Exposure Prophylaxis (PrEP) and Test and Treat (T&T), 2017.
11. O'Malley G, Barnabee G, Mugwanya K. Scaling-up PrEP Delivery in Sub-Saharan Africa: What Can We Learn from the Scale-up of ART? *Curr HIV/AIDS Rep* 2019;16(2):141-50.
12. Venter WD. Pre-exposure prophylaxis: the delivery challenge. *Front Public Health* 2018;6:188.
13. Arksey H, O'Malley L. Scoping studies: towards a methodological framework. *Int J Soc Res Methodol* 2005;8(1):19-32.
14. Mays N, Roberts E, Popay J. Synthesising research evidence 2001.
15. Aromataris E, Munn Z, (Editors). Joanna Briggs Institute Reviewer's Manual: The Joanna Briggs Institute, 2017.
16. Tricco AC, Lillie E, Zarin W, et al. PRISMA extension for scoping reviews (PRISMA-ScR): checklist and explanation. *Ann Intern Med* 2018;169(7):467-73.
17. World Bank. Sub-Saharan Africa 2019 [cited 2019 25 November]. Available from: <https://data.worldbank.org/region/sub-saharan-africa> accessed 25 November 2019.
18. EndNote [program]. EndNote X7 version. Philadelphia, PA: Clarivate, 2013.
19. Ouzzani M, Hammady H, Fedorowicz Z, et al. Rayyan—a web and mobile app for systematic reviews. *Systematic reviews* 2016;5(1):1-10.

- 1
  - 2
  - 3
  - 4
  - 5
  - 6
  - 7
  - 8
  - 9
  - 10
  - 11
  - 12
  - 13
  - 14
  - 15
  - 16
  - 17
  - 18
  - 19
  - 20
  - 21
  - 22
  - 23
  - 24
  - 25
  - 26
  - 27
  - 28
  - 29
  - 30
  - 31
  - 32
  - 33
  - 34
  - 35
  - 36
  - 37
  - 38
  - 39
  - 40
  - 41
  - 42
  - 43
  - 44
  - 45
  - 46
  - 47
  - 48
  - 49
  - 50
  - 51
  - 52
  - 53
  - 54
  - 55
  - 56
  - 57
  - 58
  - 59
  - 60
20. Harris PA, Taylor R, Thielke R, et al. Research electronic data capture (REDCap)—a metadata-driven methodology and workflow process for providing translational research informatics support. *J Biomed Inform* 2009;42(2):377-81.
21. Cochrane Effective Practice and Organisation of Care (EPOC). Suggested risk of bias criteria for EPOC reviews. EPOC Resources for review authors 2017 [cited 2020 01 April]. Available from: <https://protect-za.mimecast.com/s/vgZ1C8qzwAFjg8EMlndz5c> accessed 01 April 2020.
22. Critical Appraisal Skills Programme. Qualitative Checklist 2018 [cited 2020 01 April]. Available from: <https://casp-uk.net/casp-tools-checklists/> accessed 01 April 2020.
23. Lewin S, Langlois E, Tuncalp Ö, et al. WEIRD (Ways of Evaluating Important and Relevant Data) tool: Questions to guide assessment / critical appraisal of programme descriptions, implementation descriptions and other mainly descriptive types of evidence Oslo: Norwegian Institute of Public Health 2019 [cited 2020 01 April]. Available from: [https://epoc.cochrane.org/sites/epoc.cochrane.org/files/public/uploads/Resources-for-authors2017/weird\\_tool.pdf](https://epoc.cochrane.org/sites/epoc.cochrane.org/files/public/uploads/Resources-for-authors2017/weird_tool.pdf) accessed 01 April 2020.
24. Moher D, Liberati A, Tetzlaff J, et al. Preferred Reporting Items for Systematic Reviews and Meta-Analyses: The PRISMA Statement. *PLoS Med* 2009;6(7):e1000097. doi: 10.1371/journal.pmed.1000097
25. Bell J, Sharma S, Hasen N, et al. Awareness of PrEP and drivers and barriers to use among men aged 20-34 in Mpumalanga and KwaZulu-Natal, South Africa [abstract]. IAS 2019. Mexico City, Mexico, 2019.
26. Koss CA, Ayieko J, Owaraganise A, et al. Survey of Early Barriers to PrEP Uptake among Clients and Community Members in the SEARCH Study in Rural Kenya and Uganda [abstract]. IAS 2017. Paris, France, 2017.
27. Atujuna M, Newman PA, Wallace M, et al. Contexts of vulnerability and the acceptability of new biomedical HIV prevention technologies among key populations in South Africa: A qualitative study. *PLoS One* 2018;13(2):e0191251. doi: <https://doi.org/10.1371/journal.pone.0191251>
28. Ong'wen P, Musau A, D W, et al. Adolescent girls on PrEP: Findings from Kenya's oral PrEP scale-up supported by Jilinde [abstract]. IAS 2019. Mexico City, Mexico, 2019.
29. Rousseau E, Baeten J, Morton J, et al. Association between contraceptive use and PrEP uptake and continuation in adolescent girls and young women in Cape Town, South Africa [abstract]. IAS 2019. Mexico City, Mexico, 2019.
30. Travill D, Bekker L, Delany-Moretlwe S, et al. Sexual behavior and PrEP uptake among young African women in a demonstration project about PrEP delivery [abstract]. AIDS 2018. Amsterdam, Netherlands, 2018.
31. Mugwanya KK, Pintye J, Kinuthia J, et al. Integrating preexposure prophylaxis delivery in routine family planning clinics: A feasibility programmatic evaluation in Kenya. *PLoS Med* 2019;16(9) doi: <https://doi.org/10.1371/journal.pmed.1002885>
32. Kinuthia J, Pintye J, Abuna F, et al. Pre-exposure prophylaxis uptake and early continuation among pregnant and post-partum women within maternal and child health clinics in Kenya: results from an implementation programme. *Lancet HIV* 2020;7(1):E38-E48. doi: [https://doi.org/10.1016/S2352-3018\(19\)30335-2](https://doi.org/10.1016/S2352-3018(19)30335-2)
33. Pintye J, Kinuthia J, Allen Roberts D, et al. Integration of PrEP services into routine antenatal and postnatal care: Experiences from an implementation program in western Kenya. *J Acquir Immune Defic Syndr* 2018;79(5):590-95.

- 1  
2  
3  
4 34. Ngure K, Velloza J, Patel RC, et al. Alignment of PrEP use and effective contraceptive use  
5 among East African women in HIV serodiscordant partnerships. *International Journal*  
6 *of STD and AIDS* 2020;31(13):1263-71. doi: 10.1177/0956462420951501
- 7 35. Were D, Musau A, Mutegi J, et al. Using a HIV prevention cascade for identifying missed  
8 opportunities in PrEP delivery in Kenya: results from a programmatic surveillance  
9 study. *J Int AIDS Soc* 2020;23:e25537.
- 10 36. Delany-Moretlwe S, Chersich M, Harvey S, et al. Empowerment clubs did not increase  
11 PrEP continuation among adolescent girls and young women in South Africa and  
12 Tanzania - Results from the EMPOWER randomised trial [abstract]. AIDS 2018.  
13 Amsterdam, Netherlands, 2018.
- 14 37. Donnell D, Beesham I, Welch JD, et al. Incorporating oral PrEP into standard prevention  
15 services for South African women: a nested interrupted time-series study. *Arch Sex*  
16 *Behav* 2021 doi: 10.1007/s10508-020-01880-y  
17 10.1016/s2352-3018(21)00048-5 [published Online First: 2021/05/07]
- 18 38. Hill LM, Maseko B, Chagomerana M, et al. HIV risk, risk perception, and PrEP interest  
19 among adolescent girls and young women in Lilongwe, Malawi: operationalizing the  
20 PrEP cascade. *J Int AIDS Soc* 2020;23:e25502.
- 21 39. Maseko B, Hill LM, Phanga T, et al. Perceptions of and interest in HIV pre-exposure  
22 prophylaxis use among adolescent girls and young women in Lilongwe, Malawi. *PLoS*  
23 *One* 2020;15(1):e0226062. doi: <https://doi.org/10.1371/journal.pone.0226062>
- 24 40. Heffron R, Ngure K, Odoyo J, et al. Pre-exposure prophylaxis for HIV-negative persons  
25 with partners living with HIV: uptake, use, and effectiveness in an open-label  
26 demonstration project in East Africa. *Gates Open Res* 2018;1:3. doi:  
27 <https://dx.doi.org/10.12688/2Fgatesopenres.12752.2>
- 28 41. Koss CA, Ayieko J, Mwangwa F, et al. Early Adopters of Human Immunodeficiency Virus  
29 Preexposure Prophylaxis in a Population-based Combination Prevention Study in  
30 Rural Kenya and Uganda. *Clin Infect Dis* 2018;67(12):1853-60. doi:  
31 <https://doi.org/10.1093/cid/ciy390>
- 32 42. Mayer CM, Owaraganise A, Kabami J, et al. Distance to clinic is a barrier to PrEP uptake  
33 and visit attendance in a community in rural Uganda. *J Int AIDS Soc*  
34 2019;22(4):e25276.
- 35 43. Koss CA, Charlebois ED, Ayieko J, et al. Uptake, engagement, and adherence to pre-  
36 exposure prophylaxis offered after population HIV testing in rural Kenya and Uganda:  
37 72-week interim analysis of observational data from the SEARCH study. *Lancet HIV*  
38 2020
- 39 44. Camlin CS, Koss CA, Getahun M, et al. Understanding Demand for PrEP and Early  
40 Experiences of PrEP Use Among Young Adults in Rural Kenya and Uganda: A  
41 Qualitative Study. *AIDS Behav* 2020
- 42 45. Ngure K, Heffron R, Curran K, et al. I Knew I Would Be Safer. Experiences of Kenyan HIV  
43 Serodiscordant Couples Soon After Pre-Exposure Prophylaxis (PrEP) Initiation. *AIDS*  
44 *Patient Care STDS* 2016;30(2):78-83.
- 45 46. Gombe M, Cakouros B, Ncube G, et al. Key barriers and enablers associated with uptake  
46 and continuation of oral pre-exposure prophylaxis (PrEP) in the public sector in  
47 Zimbabwe: Qualitative perspectives of general population clients at high risk for HIV.  
48 *PLoS One* 2020;15(1) doi: <https://doi.org/10.1371/journal.pone.0227632>
- 49  
50  
51  
52  
53  
54  
55  
56  
57  
58  
59  
60



- 1
- 2
- 3
- 4 47. Bassett IV, Govere S, Millham L, et al. Contraception, HIV Services, and PrEP in South
- 5 African Hair Salons: A Qualitative Study of Owner, Stylist, and Client Perspectives. *J*
- 6 *Community Health* 2019;44(6):1150-59.
- 7 48. Bassett IV, Xu A, Govere S, et al. Contraception and PrEP in South African Hair Salons:
- 8 Owner, Stylist, and Client Views. *J Acquir Immune Defic Syndr* 2018;79(2):E78-E81.
- 9 doi: <https://dx.doi.org/10.1097%2FQAI.0000000000001794>
- 10 49. Lubwama J, Alamo S, Ajulong C, et al. Preexposure Prophylaxis for Key Populations In
- 11 Uganda: Early Scale-Up Lessons [abstract]. CROI 2019. Seattle, Washington, 2019.
- 12 50. Baeten JM, Heffron R, Kidoguchi L, et al. Integrated Delivery of Antiretroviral Treatment
- 13 and Pre-exposure Prophylaxis to HIV-1-Serodiscordant Couples: A Prospective
- 14 Implementation Study in Kenya and Uganda. *PLoS Med* 2016;13(8) doi:
- 15 <https://dx.doi.org/10.1371%2Fjournal.pmed.1002099>
- 16 51. Heffron R, Ngunjiri K, Vellozo J, et al. Implementation of a comprehensive safer conception
- 17 intervention for HIV-serodiscordant couples in Kenya: uptake, use and effectiveness.
- 18 *J Int AIDS Soc* 2019;22(4) doi: <https://doi.org/10.1002/jia2.25261>
- 19 52. Heffron R, Thomson K, Celum C, et al. Fertility Intentions, Pregnancy, and Use of PrEP
- 20 and ART for Safer Conception Among East African HIV Serodiscordant Couples. *AIDS*
- 21 *Behav* 2018;22(6):1758-65.
- 22 53. Morton JF, Myers L, Gill K, et al. Evaluation of a behavior-centered design strategy for
- 23 creating demand for oral PrEP among young women in Cape Town, South Africa.
- 24 *Gates Open Res* 2020;4
- 25 54. Ware NC, Pisarski EE, Nakku-Joloba E, et al. Integrated delivery of antiretroviral
- 26 treatment and pre-exposure prophylaxis to HIV-1 serodiscordant couples in East
- 27 Africa: a qualitative evaluation study in Uganda. *J Int AIDS Soc* 2018;21(5):e25113.
- 28 55. Sack DE, De Schacht C, Paulo P, et al. Pre-exposure prophylaxis use among HIV
- 29 serodiscordant couples: a qualitative study in Mozambique. *Global Health Action*
- 30 2021;14(1) doi: 10.1080/16549716.2021.1940764
- 31 56. Minnis AM, Atujuna M, Browne EN, et al. Preferences for long-acting Pre-Exposure
- 32 Prophylaxis (PrEP) for HIV prevention among South African youth: results of a
- 33 discrete choice experiment. *J Int AIDS Soc* 2020;23(6):e25528.
- 34 57. Cremin I, Morales F, Jewell BL, et al. Seasonal PrEP for partners of migrant miners in
- 35 southern Mozambique: a highly focused PrEP intervention. *J Int AIDS Soc*
- 36 2015;18(4):19946.
- 37 58. Irungu EM, Sharma M, Maronga C, et al. The Incremental Cost of Delivering PrEP as a
- 38 Bridge to ART for HIV Serodiscordant Couples in Public HIV Care Clinics in Kenya.
- 39 *AIDS Res Treat* 2019;2019 doi: <https://doi.org/10.1155/2019/4170615>
- 40 59. Jani N, Pilgrim N, Saria V, et al. Will male partners of adolescent girls and young women
- 41 (AGYW) support their PrEP use? A comparative analysis of AGYW and male partners
- 42 of AGYW views in Tanzania [abstract]. AIDS 2018. Amsterdam, Netherlands, 2018.
- 43 60. Makyao N, Saria V, Jani N, et al. How will social norms about parenting influence
- 44 parental support of adolescent girls and young women's (AGYW) use of PrEP?
- 45 Perspectives from parents in Tanzania [abstract]. AIDS 2018. Amsterdam,
- 46 Netherlands, 2018.
- 47 61. Roche SD, Barnabee G, Omollo V, et al. Implementation strategies for integrating pre-
- 48 exposure prophylaxis for HIV prevention and family planning services for adolescent
- 49 girls and young women in Kenya: a qualitative study. *BMC health services research*
- 50 2022;22(1):1-15.
- 51
- 52
- 53
- 54
- 55
- 56
- 57
- 58
- 59
- 60

- 1
- 2
- 3
- 4 62. Bulstra CA, Hontelez JA, Otto M, et al. Integrating HIV services and other health services:  
5 A systematic review and meta-analysis. *PLoS medicine* 2021;18(11):e1003836.
- 6 63. Surmounting PrEP delivery challenges through adaptation of implementation guidelines:  
7 Lessons learned from HIV care clinics in Kenya. *JOURNAL OF THE INTERNATIONAL*  
8 *AIDS SOCIETY*; 2019. JOHN WILEY & SONS LTD THE ATRIUM, SOUTHERN GATE,  
9 CHICHESTER PO19 8SQ, W ....
- 10 64. Santos RP, Adams ME, Lepow M, et al. Adolescents' Knowledge and Acceptance of Pre-  
11 exposure Prophylaxis (PrEP) in the Capital District Region of New York. *Open Forum*  
12 *Infectious Diseases* 2018;5(Suppl 1):S393.
- 13 65. Taggart T, Liang Y, Pina P, et al. Awareness of and willingness to use PrEP among Black  
14 and Latinx adolescents residing in higher prevalence areas in the United States. *PLoS*  
15 *One* 2020;15(7):e0234821.
- 16 66. Aaron E, Blum C, Seidman D, et al. Optimizing delivery of HIV preexposure prophylaxis  
17 for women in the United States. *AIDS Patient Care STDs* 2018;32(1):16-23.
- 18 67. Auerbach JD, Kinsky S, Brown G, et al. Knowledge, attitudes, and likelihood of pre-  
19 exposure prophylaxis (PrEP) use among US women at risk of acquiring HIV. *AIDS*  
20 *Patient Care STDs* 2015;29(2):102-10.
- 21 68. Mukumbang FC. Leaving no man behind: how differentiated service delivery models  
22 increase men's engagement in HIV care. *International Journal of Health Policy and*  
23 *Management* 2021;10(3):129.
- 24 69. Fleming PJ, Colvin C, Peacock D, et al. What role can gender-transformative  
25 programming for men play in increasing men's HIV testing and engagement in HIV  
26 care and treatment in South Africa? *Culture, health & sexuality* 2016;18(11):1251-64.
- 27 70. Fox MP, Pascoe S, Huber AN, et al. Adherence clubs and decentralized medication  
28 delivery to support patient retention and sustained viral suppression in care: Results  
29 from a cluster-randomized evaluation of differentiated ART delivery models in South  
30 Africa. *PLoS medicine* 2019;16(7):e1002874.
- 31 71. Hlongwa M, Cornell M, Malone S, et al. Uptake and Short-Term Retention in HIV  
32 Treatment Among Men in South Africa: The Coach Mpilo Pilot Project. *Global Health:*  
33 *Science and Practice* 2022;10(1)
- 34 72. The Aurum Institute. Men's Health Month: Aurum partners to implement campaigns  
35 supporting men living with HIV. [2021 [Available from:  
36 [https://www.auruminstitute.org/component/content/article/28-blog/aurum-](https://www.auruminstitute.org/component/content/article/28-blog/aurum-news/455-men-s-health-month-mina-and-coach-mpilo-fight-the-stigma-for-men-living-with-hiv?Itemid=101)  
37 [news/455-men-s-health-month-mina-and-coach-mpilo-fight-the-stigma-for-men-](https://www.auruminstitute.org/component/content/article/28-blog/aurum-news/455-men-s-health-month-mina-and-coach-mpilo-fight-the-stigma-for-men-living-with-hiv?Itemid=101)  
38 [living-with-hiv?Itemid=101](https://www.auruminstitute.org/component/content/article/28-blog/aurum-news/455-men-s-health-month-mina-and-coach-mpilo-fight-the-stigma-for-men-living-with-hiv?Itemid=101) accessed 26 Nov. 2021.
- 39 73. Lecher S, Williams J, Fonjongo PN, et al. Progress with scale-up of HIV viral load  
40 monitoring—seven sub-Saharan African countries, January 2015–June 2016.  
41 *Morbidity and Mortality Weekly Report* 2016;65(47):1332-35.
- 42 74. Smith DK, Toledo L, Smith DJ, et al. Attitudes and program preferences of African-  
43 American urban young adults about pre-exposure prophylaxis (PrEP). *AIDS Educ Prev*  
44 2012;24(5):408-21.
- 45 75. Rubtsova A, M Wingood G, Dunkle K, et al. Young adult women and correlates of  
46 potential adoption of pre-exposure prophylaxis (PrEP): results of a national survey.  
47 *Curr HIV Res* 2013;11(7):543-48.
- 48 76. Wingood GM, Dunkle K, Camp C, et al. Racial differences and correlates of potential  
49 adoption of pre-exposure prophylaxis (PrEP): results of a national survey. *J Acquir*  
50 *Immune Defic Syndr* 2013;63(0 1):S95.
- 51
- 52
- 53
- 54
- 55
- 56
- 57
- 58
- 59
- 60

- 1  
2  
3 77. Sullivan PS, Mena L, Elopre L, et al. Implementation strategies to increase PrEP uptake in  
4 the South. *Curr HIV/AIDS Rep* 2019;16(4):259-69.  
5  
6 78. Mugo NR, Ngure K, Kiragu M, et al. PrEP for Africa: what we have learnt and what is  
7 needed to move to program implementation. *Curr Opin HIV AIDS* 2016;11(1):80.  
8  
9 79. Siegler AJ, Steehler K, Sales JM, et al. A Review of HIV Pre-exposure Prophylaxis  
10 Streamlining Strategies. *Curr HIV/AIDS Rep* 2020:1-11.  
11  
12  
13  
14  
15  
16  
17  
18  
19  
20  
21  
22  
23  
24  
25  
26  
27  
28  
29  
30  
31  
32  
33  
34  
35  
36  
37  
38  
39  
40  
41  
42  
43  
44  
45  
46  
47  
48  
49  
50  
51  
52  
53  
54  
55  
56  
57  
58  
59  
60

For peer review only

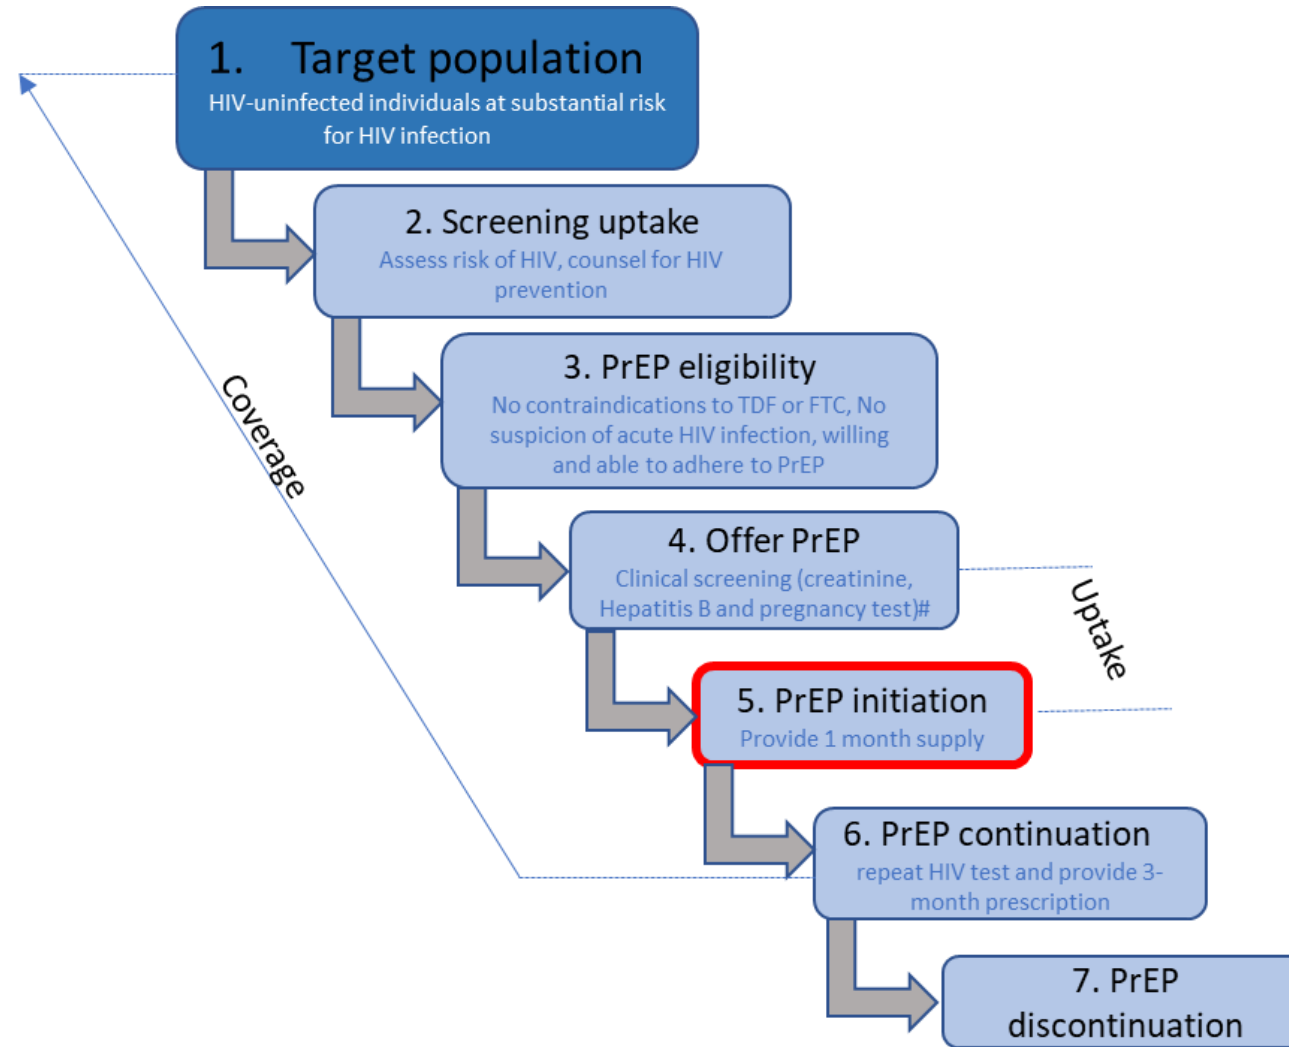

1  
2  
3  
4  
5  
6  
7  
8  
9  
10  
11  
12  
13  
14  
15  
16  
17  
18  
19  
20  
21  
22  
23  
24  
25  
26  
27  
28  
29  
30  
31  
32  
33  
34  
35  
36  
37  
38  
39  
40  
41



1  
2  
3  
4  
5  
6  
7  
8  
9  
10  
11  
12  
13  
14  
15  
16  
17  
18  
19  
20  
21  
22  
23  
24  
25  
26  
27  
28  
29  
30  
31  
32  
33  
34  
35  
36  
37  
38  
39  
40  
41

| SET |                                   | SEARCH TERMS                                                                     |
|-----|-----------------------------------|----------------------------------------------------------------------------------|
| 1   | <b>1 HIV</b>                      | HIV-1                                                                            |
| 2   |                                   | HIV                                                                              |
| 3   |                                   | Hiv                                                                              |
| 4   |                                   | Set 1- 3 will be combined with "or"                                              |
| 5   | <b>2 Pre-exposure Prophylaxis</b> | PRE-EXPOSURE PROPHYLAXIS                                                         |
| 6   |                                   | Pre-Exposure Prophylaxis                                                         |
| 7   |                                   | PrEP                                                                             |
| 8   |                                   | Set 5-7 will be combined with "or"                                               |
| 9   |                                   | Set 4 and 8 will be combined with "and"                                          |
| 10  | <b>3 Linkage to care</b>          | service provision                                                                |
| 11  |                                   | service delivery                                                                 |
| 12  |                                   | SDMs                                                                             |
| 13  |                                   | IMPLEMENTATION SCIENCE                                                           |
| 14  |                                   | model                                                                            |
| 15  |                                   | models of care                                                                   |
| 16  |                                   | differentiated care                                                              |
| 17  |                                   | linkage                                                                          |
| 18  |                                   | linkage to care                                                                  |
| 19  |                                   | intervention                                                                     |
| 20  |                                   | Set 10-19 will be combined with "or"                                             |
| 21  |                                   | Set 4, 9 and 20 will be combined with "and"                                      |
| 22  | <b>4 Country</b>                  | DEVELOPING COUNTRY                                                               |
| 23  |                                   | Sub-Saharan                                                                      |
| 24  |                                   | AFRICA SOUTH OF THE SAHARA                                                       |
| 25  |                                   | AFRICA                                                                           |
| 26  |                                   | <i>All sub-Saharan countries included as MeSH and text term combined with or</i> |
| 27  |                                   | Set 22-26 will be combined with "or"                                             |
| 28  |                                   | Set 4, 9, 20 and 27 will be combined with "and"                                  |

| Service Delivery Modality          | Author (Year) and study setting                  | Publication type and objectives                                                                                                                                 | Study population and Sample                                                                                                                                                                                                                                              | Intervention description                                                                                                                                                                                                                                                                                                                                                                                                                                                                                                                                                                                                                   | Detailed Description of Findings                                                                                                                                                                                                                                                                                                                                                                                                                                                                                                                                                                                                                                                                                                                                                                                                                                                                                                                                                                                |
|------------------------------------|--------------------------------------------------|-----------------------------------------------------------------------------------------------------------------------------------------------------------------|--------------------------------------------------------------------------------------------------------------------------------------------------------------------------------------------------------------------------------------------------------------------------|--------------------------------------------------------------------------------------------------------------------------------------------------------------------------------------------------------------------------------------------------------------------------------------------------------------------------------------------------------------------------------------------------------------------------------------------------------------------------------------------------------------------------------------------------------------------------------------------------------------------------------------------|-----------------------------------------------------------------------------------------------------------------------------------------------------------------------------------------------------------------------------------------------------------------------------------------------------------------------------------------------------------------------------------------------------------------------------------------------------------------------------------------------------------------------------------------------------------------------------------------------------------------------------------------------------------------------------------------------------------------------------------------------------------------------------------------------------------------------------------------------------------------------------------------------------------------------------------------------------------------------------------------------------------------|
| <b>Studies among AGYW</b>          |                                                  |                                                                                                                                                                 |                                                                                                                                                                                                                                                                          |                                                                                                                                                                                                                                                                                                                                                                                                                                                                                                                                                                                                                                            |                                                                                                                                                                                                                                                                                                                                                                                                                                                                                                                                                                                                                                                                                                                                                                                                                                                                                                                                                                                                                 |
| <b>Health facility<sup>a</sup></b> | Maseko et al. (2020) <sup>39</sup><br><br>Malawi | Research article<br><br>To understand knowledge of, interest in, concerns about, and delivery preferences for PrEP among AGYW enrolled in the Girl Power study. | <b>Study population:</b><br>Never been offered to use PrEP services (hypothetical opinions related to PrEP)<br><b>Sample</b><br><b>Sample size (total – N):</b> 40<br><b>Gender distribution:</b> Female: 100%<br><b>Age distribution:</b><br>15-19yrs: 21; 20-24yrs: 19 | <b>Nature of Intervention:</b> Four models of service-delivery were compared in four separate clinics: Model 1) standard of care (SoC), Model 2) Integrated youth-friendly health services; Model 3) Model 2 plus a small-group behavioural intervention on; and Model 4) Model 3 plus a cash transfer (\$5.50/month). An explanation of PrEP was provided to 40 participants prior to IDI<br><b>Intervention components:</b> HIV testing, syndromic management of STIs, family planning, and condom distribution.<br><b>NB:</b> PrEP was not provided in this study, nor was it available in government clinics at the time of the study. | <ul style="list-style-type: none"> <li>• Interest in PrEP based on a belief that their HIV risk exposure was due to factors that were out of their control, including partners having concurrent relationships, challenges with condom negotiation/use, and rape.</li> <li>• Disinterest in PrEP included: perception of low risk because of abstinence or having a single partner, use of PrEP implying infidelity among married AGYW, taking pills daily implying HIV infection.</li> <li>• Interest in initiating PrEP depends upon: <ul style="list-style-type: none"> <li>- ease of accessing PrEP (confidential),</li> <li>- packaging attributes (discrete, cartons, packets, or bottles that would give the appearance of medications for common ailments preferred</li> <li>- delivery context (available in locations frequented by youth such as schools or youth friendly spaces because of ease of access and comfort in the absence of adult patients and family members).</li> </ul> </li> </ul> |

|                                           |                                                         |                                                                                                                                                                                               |                                                                                                                                                                                                                                                                                                           |                                                                                                                                                                                                                                                                                                                                                                                                                                                                                                                                                                                                                                                    |                                                                                                                                                                                                                                                                                                                                                                                                                                                                                                                                                                                                                                                                                                                                                                                                                                                                                                                                                                                                                                                                                                                                                                                                                    |
|-------------------------------------------|---------------------------------------------------------|-----------------------------------------------------------------------------------------------------------------------------------------------------------------------------------------------|-----------------------------------------------------------------------------------------------------------------------------------------------------------------------------------------------------------------------------------------------------------------------------------------------------------|----------------------------------------------------------------------------------------------------------------------------------------------------------------------------------------------------------------------------------------------------------------------------------------------------------------------------------------------------------------------------------------------------------------------------------------------------------------------------------------------------------------------------------------------------------------------------------------------------------------------------------------------------|--------------------------------------------------------------------------------------------------------------------------------------------------------------------------------------------------------------------------------------------------------------------------------------------------------------------------------------------------------------------------------------------------------------------------------------------------------------------------------------------------------------------------------------------------------------------------------------------------------------------------------------------------------------------------------------------------------------------------------------------------------------------------------------------------------------------------------------------------------------------------------------------------------------------------------------------------------------------------------------------------------------------------------------------------------------------------------------------------------------------------------------------------------------------------------------------------------------------|
| <p><b>Health facility<sup>b</sup></b></p> | <p>Mugwanya et al. (2019)<sup>31</sup></p> <p>Kenya</p> | <p>Research article</p> <p>To demonstrate the feasibility of integrating PrEP delivery within routine family planning clinics to reach at-risk AGYW for PrEP in HIV high burden settings.</p> | <p><b>Study population:</b><br/>Offered to use PrEP services</p> <p><b>Sample</b><br/><i>Sample size (total – N):</i> 1271<br/><i>Gender distribution:</i> Female: 100%<br/><i>Age distribution:</i><br/>Median: 25 (22-29)<br/>&lt;20: 105<br/>20-24: 522<br/>25-29: 356<br/>30-34: 172<br/>≥35: 116</p> | <p><b>Nature of Intervention:</b> PrEP-dedicated nurse-led integrated delivery of PrEP in family planning clinics</p> <p><b>Intervention components:</b><br/>Newly hired nurses were trained on HIV risk assessment, counselling, and PrEP provision. These nurses performed only these duties at the FP clinic. Women attending FP clinics completed other services were then referred to the PrEP-dedicated nurse. This nurse counselled and assessed willingness to consider PrEP (guided by a national guidelines and HIV risk assessment screening tool). Interested and medically eligible women were provided same-day PrEP initiation.</p> | <ul style="list-style-type: none"> <li>• Of 1,271 women screened, 22% initiated PrEP, and 41% returned for at least one refill.</li> <li>• PrEP uptake was independently associated with reported male-partner HIV status (<math>p &lt; 0.001</math>) and marital status (<math>p = 0.04</math>).</li> <li>• More women &gt;24 years (26%) initiated PrEP compared to young women &lt;24 years (16%).</li> <li>• For women &gt;24 years, the likelihood of initiating PrEP increased by about 3% for each additional year of a woman's age (<math>p &lt; 0.001</math>).</li> <li>• FP clinics can be an effective platform to efficiently reach HIV at-risk women who may benefit from PrEP.</li> <li>• Integration of PrEP delivery in FP clinics, makes this a potential "one-stop" location for FP and PrEP.</li> <li>• Although FP visits are busy, efficient implementation strategies such as less frequent PrEP visits and expanding the pool of providers who might be able to screen and provide PrEP beyond the few clinicians and nurses (e.g., training and empowering HIV testing counsellors and community health workers or peer educators) can be built into existing routine services.</li> </ul> |
| <p><b>Health facility<sup>b</sup></b></p> | <p>Pintye et al. (2018)<sup>33</sup></p> <p>Kenya</p>   | <p>Research article</p> <p>To define approaches for integrating PrEP into routine</p>                                                                                                         | <p><b>Study population:</b><br/>Offered to use PrEP services</p> <p><b>Sample</b></p>                                                                                                                                                                                                                     | <p><b>Nature of Intervention:</b> Nurse-led teams worked with maternal and child health (MCH) staff at 16 public, faith-based, and</p>                                                                                                                                                                                                                                                                                                                                                                                                                                                                                                             | <ul style="list-style-type: none"> <li>• Clinics developed two approaches for integrating PrEP delivery within ANC/PNC: 1) co-delivery: ANC/PNC and</li> </ul>                                                                                                                                                                                                                                                                                                                                                                                                                                                                                                                                                                                                                                                                                                                                                                                                                                                                                                                                                                                                                                                     |



|                        |                                                   |                                                                                                                                             |                                                                                                                                                                                                                                                                                       |                                                                                                                                                                                                                                                                                                                                                                                                                                                                                                                                                                                                                                    |                                                                                                                                                                                                                                                                                                                                                                                                                                                                                                                                                                                                                                                                                                                                                                                                                                                                                 |
|------------------------|---------------------------------------------------|---------------------------------------------------------------------------------------------------------------------------------------------|---------------------------------------------------------------------------------------------------------------------------------------------------------------------------------------------------------------------------------------------------------------------------------------|------------------------------------------------------------------------------------------------------------------------------------------------------------------------------------------------------------------------------------------------------------------------------------------------------------------------------------------------------------------------------------------------------------------------------------------------------------------------------------------------------------------------------------------------------------------------------------------------------------------------------------|---------------------------------------------------------------------------------------------------------------------------------------------------------------------------------------------------------------------------------------------------------------------------------------------------------------------------------------------------------------------------------------------------------------------------------------------------------------------------------------------------------------------------------------------------------------------------------------------------------------------------------------------------------------------------------------------------------------------------------------------------------------------------------------------------------------------------------------------------------------------------------|
|                        |                                                   | antenatal and post-natal care (ANC/PNC) using PrIYA Program as a case study.                                                                | <p><b>Sample size (total – N):</b> 16 Health facilities; 40 program-supported nurses</p> <p><b>Gender distribution:</b> Female 100%</p> <p><b>Age distribution:</b> not described</p>                                                                                                 | <p>private facilities to determine optimal clinic flow for PrEP integration into antenatal (ANC) and postnatal (PNC) care. A program-dedicated nurse facilitated integration.</p> <p><b>Intervention components:</b></p> <p>All ANC/PNC clients received assessment for behavioural risk (completion of a questionnaire and willingness to consider PrEP, general informational counselling on PrEP depending on the client's awareness and interest in PrEP. Among clients who were willing to initiate PrEP, PrEP counselling also included information on how to use PrEP and adherence as well as medication dispensation.</p> | <p>PrEP services delivered by same MCH nurse or 2) sequential services: PrEP services after ANC/PNC by a PrEP-specialized nurse.</p> <ul style="list-style-type: none"> <li>• 86 ANC/PNC visits were observed.</li> <li>• Clients who initiated PrEP took a median of 18 minutes (IQR 15-26) for PrEP-related activities (risk assessment, PrEP counselling, creatinine testing, dispensation, and documentation) in addition to other routine ANC/PNC activities.</li> <li>• For clients who declined PrEP, an additional 13 minutes (IQR 7-15) was spent on PrEP-related risk assessment and counselling.</li> <li>• PrEP-specific activities took &lt;20 minutes per client, the moderate additional time burden for PrEP initiation in MCH would likely decline with community awareness and innovations such as group/peer counselling or expedited dispensing.</li> </ul> |
| <b>Health facility</b> | Kinuthia et al. (2020) <sup>32</sup><br><br>Kenya | <p>Research article</p> <p>We implemented and evaluated a novel programme to provide PrEP in maternal and child health clinics in Kenya</p> | <p><b>Study population:</b><br/>Offered to use PrEP services</p> <p><b>Sample</b></p> <p><b>Sample size (total – N):</b><br/>9376 women</p> <p><b>Gender distribution:</b><br/>Female:100%</p> <p><b>Age distribution:</b><br/>&lt;24: 5033<br/>Median age: 24 years (IQR: 21-28)</p> | <p><b>Nature of Intervention:</b></p> <p>Integration of PrEP into existing structures at 16 maternal and child health clinics (public, faith-based, and private sector) At each facility, they offered sensitisation sessions to introduce the programme, educate facility staff on PrEP, and seek advice on the best way to integrate PrEP delivery at the facility.</p>                                                                                                                                                                                                                                                          | <ul style="list-style-type: none"> <li>• PrEP initiation: 2030 (21.7%) women-initiated PrEP: 79.3% women with partners living with HIV, 37.2% with partners of unknown HIV status, and 11.6% women with HIV-negative partners.</li> <li>• 999 (49.2%) women who initiated PrEP were younger than 24 years</li> <li>• Reasons for initiating PrEP: having a partner living with HIV</li> </ul>                                                                                                                                                                                                                                                                                                                                                                                                                                                                                   |

1  
2  
3  
4  
5  
6  
7  
8  
9  
10  
11  
12  
13  
14  
15  
16  
17  
18  
19  
20  
21  
22  
23  
24  
25  
26  
27  
28  
29  
30  
31  
32  
33  
34  
35  
36  
37

For peer review only

|                        |                                                 |                                                                                     |                                                                                             |                                                                                                                                                                                                                                                                                                                                                                                                                                                                                                                                 |                                                                                                                                                                                                                                                                                                                                                                                                                                                                                                                                                                                                                                                                                                                                                                                                                                                                                                                                                                                                                                                                                                                                                                       |
|------------------------|-------------------------------------------------|-------------------------------------------------------------------------------------|---------------------------------------------------------------------------------------------|---------------------------------------------------------------------------------------------------------------------------------------------------------------------------------------------------------------------------------------------------------------------------------------------------------------------------------------------------------------------------------------------------------------------------------------------------------------------------------------------------------------------------------|-----------------------------------------------------------------------------------------------------------------------------------------------------------------------------------------------------------------------------------------------------------------------------------------------------------------------------------------------------------------------------------------------------------------------------------------------------------------------------------------------------------------------------------------------------------------------------------------------------------------------------------------------------------------------------------------------------------------------------------------------------------------------------------------------------------------------------------------------------------------------------------------------------------------------------------------------------------------------------------------------------------------------------------------------------------------------------------------------------------------------------------------------------------------------|
|                        |                                                 |                                                                                     |                                                                                             | <p><b>Intervention components:</b><br/> Programme nurses approached all eligible women provided PrEP counselling as part of routine maternal and child health clinic processes. Risk was assessed using a using a risk assessment tool<br/> Women who did not know the HIV status of their partners were offered HIV self-testing kits, if they were willing to test with their partners at home. All women (regardless of risk factors) were informed that PrEP was available if they perceived they were at risk for HIV.</p> | <p>or of unknown HIV status and feeling at risk for acquiring HIV. Reasons for declining PrEP: need to consult partner and low perceived HIV risk Factors associated with initiation: being younger than 24 years, having a partner living with HIV or of unknown HIV status, gestational age less than 26 weeks among pregnant women, having experienced intimate partner violence in the previous 6 months, or sharing needles while engaging in injection drug use, diagnosed or treated for an STI, forced to have sex, and had recurrently used PEP.</p> <ul style="list-style-type: none"> <li>• PrEP continuation: 38.7% of 2030 women returned for PrEP refill at least 1 month after initiation</li> <li>• Factors associated with continuation: women with HIV-positive partners.</li> <li>• Reasons for discontinuation: side effects, no longer perceiving HIV risk, and partner known to be HIV-negative.</li> <li>• PrEP refills: 21.7% of women who initiated PrEP at least 3 months before this evaluation returned for PrEP refill. Of these 242 (54.9%) were younger than 24 years and 199 (45.1%) were aged 24 years or older (p=0.05).</li> </ul> |
| <b>Health facility</b> | Pintye et al. (2019) <sup>29</sup><br><br>Kenya | Conference abstract<br><br>To understand motivations for early PrEP discontinuation | <b>Study population:</b><br>Offered to use PrEP services<br><b>Sample size (total – N):</b> | <b>Nature of Intervention:</b><br>The PrIYA Program provides real world evidence on delivering PrEP to AGYW                                                                                                                                                                                                                                                                                                                                                                                                                     | <ul style="list-style-type: none"> <li>• Interest in initiating PrEP was heavily influenced by one-on-one interactions with a close</li> </ul>                                                                                                                                                                                                                                                                                                                                                                                                                                                                                                                                                                                                                                                                                                                                                                                                                                                                                                                                                                                                                        |

42  
43  
44  
45  
46  
47

|                                    |                                               |                                                                                                                                                                           |                                                                                                                                                                                                                                                                                        |                                                                                                                                                                                                                                                                                                                                                                                                                                                                                                   |                                                                                                                                                                                                                                                                                                                                                                                                                                                                                                                                                                                                                                                                                                |
|------------------------------------|-----------------------------------------------|---------------------------------------------------------------------------------------------------------------------------------------------------------------------------|----------------------------------------------------------------------------------------------------------------------------------------------------------------------------------------------------------------------------------------------------------------------------------------|---------------------------------------------------------------------------------------------------------------------------------------------------------------------------------------------------------------------------------------------------------------------------------------------------------------------------------------------------------------------------------------------------------------------------------------------------------------------------------------------------|------------------------------------------------------------------------------------------------------------------------------------------------------------------------------------------------------------------------------------------------------------------------------------------------------------------------------------------------------------------------------------------------------------------------------------------------------------------------------------------------------------------------------------------------------------------------------------------------------------------------------------------------------------------------------------------------|
|                                    |                                               | among AGYW and Adolescents (PrIYA) Program                                                                                                                                | 69 AGYW<br>69 in-depth interviews: 21 AGYW received, but never used PrEP • 24 discontinued PrEP within 1 month • 24 discontinued PrEP within 3 months<br><b>Gender distribution:</b><br>Females: 100%<br><b>Age distribution:</b><br>Age (years) 22 (20-23)                            | seeking routine ANC, PNC and family planning (FP) services within 16 MCH clinics in Kisumu County, Kenya<br><b>Intervention components:</b><br>N/A<br>AGYW were identified by program nurses and purposively sampled based on 3 categories                                                                                                                                                                                                                                                        | friend, relative, or teacher/professor<br><ul style="list-style-type: none"> <li>• Early PrEP discontinuation patterns were influenced by side effects (feared or experienced) and important life events AGYW frequently stopped PrEP after childbirth and found it challenging to remember to take PrEP during the complex transition to motherhood</li> <li>• AGYW reported that pre-initiation counselling focused on adherence; many were unaware that they could restart PrEP after stopping</li> <li>• Messaging on stopping/restarting PrEP tailored to life events common among AGYW, such as childbirth and periods away from partners, could promote appropriate PrEP use</li> </ul> |
| <b>Health facility<sup>a</sup></b> | Hill et al (2020) <sup>38</sup><br><br>Malawi | Research article<br><br>To understand the level of interest in PrEP among AGYW at highest HIV risk, and the potential role of perceived risk in motivating PrEP interest. | <b>Study population:</b><br>Never been offered to use PrEP services (hypothetical opinions related to PrEP)<br><b>Sample</b><br><b>Sample size (total – N):</b> 825<br><b>Gender distribution:</b> Female: 100%<br><b>Age distribution:</b><br>Median: 20 [18 to 22] (range: 15 to 27) | <b>Nature of Intervention:</b><br>AGYW rated their potential interest in using PrEP after receiving this explanation: "PrEP is a medicine that can be used to prevent HIV for people who are HIV-negative. To be protected with PrEP, a pill is taken every day. These pills contain some of the same medicine used to treat people who already have HIV. PrEP is not currently available in Malawi."<br><b>Intervention components:</b><br>participants were enrolled and followed for one year. | <ul style="list-style-type: none"> <li>• Epidemiologic risk scores were positively associated with PrEP interest, high numbers of AGYW both above and below the high-risk cut-off were very interested in PrEP (68% vs. 63%).</li> <li>• Perceived risk partially explained the relationship between HIV risk and PrEP interest; greater epidemiologic HIV risk was associated with high perceived risk, which was in turn associated with PrEP interest.</li> <li>• Many more high-risk AGYW were interested in PrEP (68%)</li> </ul>                                                                                                                                                         |

|                                                              |                                                                         |                                                                                                                                                     |                                                                                                                                                                                                                                            |                                                                                                                                                                                                                                                                                                                                                        |                                                                                                                                                                                                                                                                                                                                                                                                                                                                                                                                                                             |
|--------------------------------------------------------------|-------------------------------------------------------------------------|-----------------------------------------------------------------------------------------------------------------------------------------------------|--------------------------------------------------------------------------------------------------------------------------------------------------------------------------------------------------------------------------------------------|--------------------------------------------------------------------------------------------------------------------------------------------------------------------------------------------------------------------------------------------------------------------------------------------------------------------------------------------------------|-----------------------------------------------------------------------------------------------------------------------------------------------------------------------------------------------------------------------------------------------------------------------------------------------------------------------------------------------------------------------------------------------------------------------------------------------------------------------------------------------------------------------------------------------------------------------------|
|                                                              |                                                                         |                                                                                                                                                     |                                                                                                                                                                                                                                            | <p><b>NB:</b> PrEP was not provided in this study, nor was it available in government clinics at the time of the study.</p>                                                                                                                                                                                                                            | <p>than expressed a high level of perceived HIV risk (26%).</p> <ul style="list-style-type: none"> <li>• High number of participants with risk scores below the high-risk cut-off who both expressed high perceived risk and interest in PrEP suggesting that demand for PrEP among AGYW may not be well aligned with epidemiologic risk</li> </ul>                                                                                                                                                                                                                         |
| <p><b>Mobile clinic/health facility<sup>c</sup></b></p>      | <p>Travill et al. (2018)<sup>30</sup></p> <p>Kenya and South Africa</p> | <p>Conference abstract</p> <p>To assess PrEP uptake and sexual behaviour in the POWER cohort.</p>                                                   | <p><b>Study population:</b><br/>Offered to use PrEP services</p> <p><b>Sample</b><br/><i>Sample size (total – N):</i> 330<br/><i>Gender distribution:</i> Female: 100%<br/><i>Age distribution:</i> Median age: 20.5 years (IQR:19-22)</p> | <p><b>Nature of Intervention:</b> PrEP was integrated with reproductive health services at family planning clinics (Kisumu, Kenya), an adolescent and youth-friendly clinic (Johannesburg, South Africa [SA]) and a mobile van for reproductive health services for youth (Cape Town, SA)</p> <p><b>Intervention components:</b><br/>PrEP for AGYW</p> | <ul style="list-style-type: none"> <li>• PrEP uptake at the initial visit was 90% across all sites.</li> <li>• Two-thirds (68%) did not know their partners' HIV status and only 4% were in a known sero-discordant relationship.</li> <li>• Main reasons for declining PrEP were fears of HIV stigma or partner reactions</li> <li>• AGYW had evidence of high HIV risk using a risk score, indicating that women initiating PrEP would benefit from it.</li> <li>• AGYW had high willingness to initiate PrEP when delivered in these youth-friendly settings.</li> </ul> |
| <p><b>Hybrid (community-health facility)<sup>c</sup></b></p> | <p>Ong'wen et al. (2018)<sup>28</sup></p> <p>Kenya</p>                  | <p>Conference abstract</p> <p>To know more about adolescent girls accessing routine PrEP services in the context of national scale-up programs.</p> | <p><b>Study population:</b><br/>Offered to use PrEP services</p> <p><b>Sample</b><br/><i>Sample size (total – N):</i> 1851<br/><i>Gender distribution:</i> Females: 100%<br/><i>Age distribution:</i> 15-19 years</p>                      | <p><b>Nature of Intervention:</b><br/>PrEP integration through drop-in centres (DICEs), public and private clinics</p> <p><b>Intervention components:</b><br/>The adolescents received either static or outreach services from 93 Jilinde supported clinics</p>                                                                                        | <ul style="list-style-type: none"> <li>• Among 28,268 clients initiating PrEP, 1851 (6.5%) were adolescent girls</li> <li>• DICEs, clinics designed primarily for sex workers, were the preferred PrEP outlet for adolescent girls, with 66% accessing services in DICEs, 25% accessed PrEP services in public clinics and 9% in private clinics.</li> <li>• Entry to PrEP was through peer educators and networks (50%);</li> </ul>                                                                                                                                        |

|                                                                                                                                                          |                                                                                                                  |                                                                                                                                                                                         |                                                                                                                                                                                                                |                                                                                                                                                                                                                                                                                                                                                            |                                                                                                                                                                                                                                                                                                                                                                                                                                                                                                                                                                                                                                                                                                                                                                                                                          |
|----------------------------------------------------------------------------------------------------------------------------------------------------------|------------------------------------------------------------------------------------------------------------------|-----------------------------------------------------------------------------------------------------------------------------------------------------------------------------------------|----------------------------------------------------------------------------------------------------------------------------------------------------------------------------------------------------------------|------------------------------------------------------------------------------------------------------------------------------------------------------------------------------------------------------------------------------------------------------------------------------------------------------------------------------------------------------------|--------------------------------------------------------------------------------------------------------------------------------------------------------------------------------------------------------------------------------------------------------------------------------------------------------------------------------------------------------------------------------------------------------------------------------------------------------------------------------------------------------------------------------------------------------------------------------------------------------------------------------------------------------------------------------------------------------------------------------------------------------------------------------------------------------------------------|
|                                                                                                                                                          |                                                                                                                  |                                                                                                                                                                                         |                                                                                                                                                                                                                |                                                                                                                                                                                                                                                                                                                                                            | community outreaches (20%); and within health facilities (30%)                                                                                                                                                                                                                                                                                                                                                                                                                                                                                                                                                                                                                                                                                                                                                           |
|                                                                                                                                                          |                                                                                                                  |                                                                                                                                                                                         |                                                                                                                                                                                                                |                                                                                                                                                                                                                                                                                                                                                            | <ul style="list-style-type: none"> <li>• Efforts to make PrEP accessible to AGYW at risk of HIV acquisition should include restructuring the service delivery model</li> </ul>                                                                                                                                                                                                                                                                                                                                                                                                                                                                                                                                                                                                                                           |
| 10<br>11<br>12<br>13<br>14<br>15<br>16<br>17<br>18<br>19<br>20<br>21<br>22<br>23<br>24<br>25<br>26<br>27<br>28<br>29<br>30<br>31<br>32<br>33<br>34<br>35 | <p><b>Mobile clinic<sup>c</sup></b></p> <p>Rousseau et al. (2019)<sup>29</sup></p> <p>South Africa</p>           | <p>Conference abstract</p> <p>Hypothesized that contraceptive use was associated with PrEP uptake and continuation in young women accessing sexual and reproductive health services</p> | <p><b>Study population:</b><br/>Offered to use PrEP services</p> <p><b>Sample</b><br/><i>Sample size (total – N):</i> 1096<br/><i>Gender distribution:</i> Female: 100%<br/><i>Age distribution:</i> 16-25</p> | <p><b>Nature of Intervention:</b><br/>Contraceptive use associated with PrEP uptake and continuation in AGYW accessing sexual and reproductive health services (SRHS) from a mobile clinic</p> <p><b>Intervention components:</b><br/>Sexual reproductive health service including HIV testing, contraception (oral, injectable and implant), and PrEP</p> | <ul style="list-style-type: none"> <li>• Among 1096 AGYW who accessed SRHS 31% initiated PrEP on the same day.</li> <li>• AGYW who were using contraception were significantly more likely to initiate PrEP on the same day compared to those who declined PrEP (76% vs 66% on contraception at that visit; p=0.001).</li> <li>• PrEP initiation was also significantly associated with contraception initiation; contraception was initiated by 44% of AGYW on the same day as PrEP initiation compared to 30% contraception starts in AGYW who declined PrEP (p=0.003).</li> <li>• AGYW's contraception use facilitated PrEP initiation and continuation, PrEP initiation also encouraged young women to initiate contraception use supporting the integration of SRHS with the provision of PrEP for AGYW.</li> </ul> |
| 36<br>37<br>38<br>39<br>40<br>41<br>42<br>43<br>44<br>45<br>46<br>47                                                                                     | <p><b>Research site</b></p> <p>Delany-Moretlwe et al. (2018)<sup>36</sup></p> <p>South Africa &amp; Tanzania</p> | <p>Conference abstract</p> <p>To evaluate whether empowerment clubs increase PrEP uptake and continuation among AGYW.</p>                                                               | <p><b>Study population:</b><br/>Offered to use PrEP services</p> <p><b>Sample</b><br/><i>Sample size (total – N):</i><br/><i>Gender distribution:</i><br/>Female:100%</p>                                      | <p><b>Nature of Intervention:</b><br/>Participants were randomised to standard of care (SoC), which included comprehensive sexual and reproductive health care, with counselling and SMS</p>                                                                                                                                                               | <ul style="list-style-type: none"> <li>• 431 AGYW enrolled and 213 randomised to clubs</li> <li>• 97% initiated PrEP</li> <li>• PrEP continuation did not vary significantly by study arm (p-value =0.31)</li> </ul>                                                                                                                                                                                                                                                                                                                                                                                                                                                                                                                                                                                                     |

|                                           |                                                         |                                                                                                                                                                                                                                     |                                                                                                                                                                                                                                                                                   |                                                                                                                                                                                                                                                                                                                                                                                                                                                                                                                        |                                                                                                                                                                                                                                                                                                                                                                                                                                                                                                                        |
|-------------------------------------------|---------------------------------------------------------|-------------------------------------------------------------------------------------------------------------------------------------------------------------------------------------------------------------------------------------|-----------------------------------------------------------------------------------------------------------------------------------------------------------------------------------------------------------------------------------------------------------------------------------|------------------------------------------------------------------------------------------------------------------------------------------------------------------------------------------------------------------------------------------------------------------------------------------------------------------------------------------------------------------------------------------------------------------------------------------------------------------------------------------------------------------------|------------------------------------------------------------------------------------------------------------------------------------------------------------------------------------------------------------------------------------------------------------------------------------------------------------------------------------------------------------------------------------------------------------------------------------------------------------------------------------------------------------------------|
|                                           |                                                         |                                                                                                                                                                                                                                     | <b>Age distribution:</b><br>Not mentioned                                                                                                                                                                                                                                         | reminders for PrEP users, or to empowerment clubs plus SOC.<br><b>Intervention components:</b><br>Facilitators-led small group sessions and clinic follow-up visits for sexually active AGYW on PrEP                                                                                                                                                                                                                                                                                                                   | <ul style="list-style-type: none"> <li>PrEP continuation was 73% at month 1, 61% at month 3 and 34% at month 6.</li> <li>While PrEP uptake was high in this at-risk population, use diminished with time. Empowerment club participation was low and did not enhance PrEP continuation, contrary to experiences in the HIV treatment field.</li> </ul>                                                                                                                                                                 |
| <b>Research Site</b>                      | Donnell et al. (2021) <sup>37</sup><br><br>South Africa | Research article<br><br>To assess the effect of on-site access to PrEP on HIV incidence.                                                                                                                                            | <b>Study population:</b><br>Offered to use PrEP services<br><b>Sample</b><br><b>Sample size (total – N):</b> 2121<br><b>Gender distribution:</b><br>Female:100%<br><b>Age distribution:</b><br>16-35 years; median age: 23 years (IQR 20-27)                                      | <b>Nature of Intervention:</b><br>On-site PrEP access at nine trial sites provided by research staff<br><b>Intervention components:</b><br>Research nurse provided PrEP                                                                                                                                                                                                                                                                                                                                                | <ul style="list-style-type: none"> <li>After on-site PrEP access began 543 (26%) out of 2124 reported PrEP use.</li> <li>HIV incidence was 2.16% after on-site PrEP access, compared with 4.65% before PrEP access (p=0.0085).</li> <li>Future studies of HIV prevention should incorporate PrEP as part of the standard of prevention</li> </ul>                                                                                                                                                                      |
| <b>Hybrid (community-Health facility)</b> | Were et al (2020) <sup>35</sup><br><br>Kenya            | Research article<br><br>To describe the programmatic application of an oral PrEP cascade; to quantify progression across each step of the cascade for female sex workers (FSW), MSM and AGYW and, to identify missed opportunities. | <b>Study population:</b><br>Offered to use PrEP services<br><b>Sample</b><br><b>Sample size (total – N):</b><br>299,798<br><b>Gender distribution:</b><br>FSW: 211,927, MSM: 47,533 MSM and AGYW: 40,338<br><b>Age distribution:</b><br>AGYW: 15-24; FSW >15 years; MSM:>15 years | <b>Nature of Intervention:</b><br>Scaling up oral PrEP through integration into routine health services in drop-in centres (DICES), public and private health facilities<br><br><b>Intervention components:</b><br>Individuals enter the PrEP pathway through community mobilization. Individuals who are interested in PrEP are referred to facilities providing PrEP, where they undergo HIV testing services. Clients who screen positive for substantial behavioural risk, or who request PrEP, are referred to an | <b>Quantitative:</b> <ul style="list-style-type: none"> <li>Among PrEP-eligible individuals, 2,900 (11%) AGYW, were initiated on PrEP. Of these clients, whereas 55% of AGYW were between 20 and 24 years.</li> <li>Majority (81%) of clients-initiated PrEP through DICES, whereas 14% and 5% were initiated through public and private facilities respectively.</li> <li>PrEP cascade for AGYW aged 15-19 years: HIV- negative (99%), screened (22%), eligible (36%), initiation (95%), month 1 follow-up</li> </ul> |

1  
2  
3  
4  
5  
6  
7  
8  
9  
10  
11  
12  
13  
14  
15  
16  
17  
18  
19  
20  
21  
22  
23  
24  
25  
26  
27  
28  
29  
30  
31  
32  
33  
34  
35  
36  
37  
38  
39  
40  
41  
42  
43  
44  
45  
46  
47

|  |  |  |                                                                                                                                                                                                                                |                                                                                                                                                                                                                                                                                                                                                                                                                                                                                                                                                                                                                                                                                                                                                                                                                                                                                                                                                                                                                                                                                                                                                                                 |
|--|--|--|--------------------------------------------------------------------------------------------------------------------------------------------------------------------------------------------------------------------------------|---------------------------------------------------------------------------------------------------------------------------------------------------------------------------------------------------------------------------------------------------------------------------------------------------------------------------------------------------------------------------------------------------------------------------------------------------------------------------------------------------------------------------------------------------------------------------------------------------------------------------------------------------------------------------------------------------------------------------------------------------------------------------------------------------------------------------------------------------------------------------------------------------------------------------------------------------------------------------------------------------------------------------------------------------------------------------------------------------------------------------------------------------------------------------------|
|  |  |  | <p>onsite clinician who conducts a clinical assessment and provides PrEP to clients who are eligible and opt-in. Clients are followed-up visit at the same facility one month following initiation and monthly thereafter.</p> | <p>(31%), month 3 follow up (5%)</p> <ul style="list-style-type: none"> <li>• PrEP cascade for AGYW aged 20-24 years: HIV- negative (98%), screened (23%), eligible (34%), initiation (91%), month 1 follow-up (32%), month 3 follow up (5%)</li> <li>• AGYW had higher missed opportunities for screening (78%). Among those screened, a substantially higher proportion of AGYW (65%) were ineligible for PrEP.</li> <li>• Missed opportunities for PrEP initiation was 8% among AGYW.</li> <li>• Majority of AGYW did not persist on PrEP use at month-1 (68%) and month-3 (94%) follow-ups.</li> </ul> <p><b>Qualitative</b></p> <ul style="list-style-type: none"> <li>• Eligibility for PrEP: Poor rapport between AGYW and providers inhibits disclosure of risk behaviours. Peer mobilization and referral of low-risk individuals coupled with inadequate client education on PrEP.</li> <li>• Initiation of PrEP: Myths and misconceptions about PrEP and low risk perception among FSW, MSM and AGYW. Co-location of both PrEP and HIV services in comprehensive care centres (HIV clinics) resulted in PrEP clients feeling stigmatized as HIV positive.</li> </ul> |
|--|--|--|--------------------------------------------------------------------------------------------------------------------------------------------------------------------------------------------------------------------------------|---------------------------------------------------------------------------------------------------------------------------------------------------------------------------------------------------------------------------------------------------------------------------------------------------------------------------------------------------------------------------------------------------------------------------------------------------------------------------------------------------------------------------------------------------------------------------------------------------------------------------------------------------------------------------------------------------------------------------------------------------------------------------------------------------------------------------------------------------------------------------------------------------------------------------------------------------------------------------------------------------------------------------------------------------------------------------------------------------------------------------------------------------------------------------------|

1  
2  
3  
4  
5  
6  
7  
8  
9  
10  
11  
12  
13  
14  
15  
16  
17  
18  
19  
20  
21  
22  
23  
24  
25  
26  
27  
28  
29  
30  
31  
32  
33  
34  
35  
36  
37  
38  
39  
40  
41  
42  
43  
44  
45  
46  
47

|                                   |                                                      |                                                                                                                                  |                                                                                                                                                                                                                                                                                        |                                                                                                                                                  |                                                                                                                                                                                                                                                                                                                                                                                                                                                                                                                                                                                                                                                                                                                                                                                                                                                                                  |
|-----------------------------------|------------------------------------------------------|----------------------------------------------------------------------------------------------------------------------------------|----------------------------------------------------------------------------------------------------------------------------------------------------------------------------------------------------------------------------------------------------------------------------------------|--------------------------------------------------------------------------------------------------------------------------------------------------|----------------------------------------------------------------------------------------------------------------------------------------------------------------------------------------------------------------------------------------------------------------------------------------------------------------------------------------------------------------------------------------------------------------------------------------------------------------------------------------------------------------------------------------------------------------------------------------------------------------------------------------------------------------------------------------------------------------------------------------------------------------------------------------------------------------------------------------------------------------------------------|
|                                   |                                                      |                                                                                                                                  |                                                                                                                                                                                                                                                                                        |                                                                                                                                                  | Stigma-related discouragement from peers, family and friends for eligible users. Providers reluctance to prescribe PrEP associated with reluctance to increase provider workload; provider belief that client will not adhere to PrEP. Insensitive referral and access pathways in public and private health facilities.                                                                                                                                                                                                                                                                                                                                                                                                                                                                                                                                                         |
| <b>Studies among Men</b>          |                                                      |                                                                                                                                  |                                                                                                                                                                                                                                                                                        |                                                                                                                                                  |                                                                                                                                                                                                                                                                                                                                                                                                                                                                                                                                                                                                                                                                                                                                                                                                                                                                                  |
| <b>Not specified</b>              | Bell et al. (2019) <sup>25</sup><br><br>South Africa | Conference abstract<br><br>To understand perceptions of PrEP, and barriers and enablers of uptake among young South African men. | <b>Study population:</b> Never been offered to use PrEP services (hypothetical opinions related to PrEP)<br><b>Sample</b><br><i>Sample size (total – N):</i> 2077 (Quantitative: 2019; Qualitative: 58)<br><b>Gender distribution:</b><br>Male: 100%<br><b>Age distribution:</b> 20-34 | <b>Nature of Intervention:</b><br>Perceptions of PrEP use and barriers and enablers of uptake. 58 IDIs<br><b>Intervention components:</b><br>N/A | <ul style="list-style-type: none"> <li>• <b>Enablers to PrEP use:</b> <ul style="list-style-type: none"> <li>- Maintain an HIV-negative status</li> <li>- Avoid conflict and turmoil that HIV diagnosis would bring</li> <li>- High degree of enthusiasm towards the concept</li> </ul> </li> <li>• <b>Barriers to PrEP use:</b> <ul style="list-style-type: none"> <li>- Practical: remembering to take the pill daily, side effects and access to clinics.</li> <li>- Knowledge: Had basic information, confused PrEP with PEP</li> <li>- Psychological: perceived as "only for women" and health seeking behaviour is not the norm for men.</li> <li>- Social: Being seen at clinics by community members, as people will assume that they are HIV positive.</li> <li>- Interpersonal: Keep PrEP use a secret from their partners, friends and family.</li> </ul> </li> </ul> |
| <b>Studies among AGYW and Men</b> |                                                      |                                                                                                                                  |                                                                                                                                                                                                                                                                                        |                                                                                                                                                  |                                                                                                                                                                                                                                                                                                                                                                                                                                                                                                                                                                                                                                                                                                                                                                                                                                                                                  |



|                                                                                                                                                                                                                                                                                            |                                                                   |                                                                                                                                                                   |                                                                                                                                                                                                                                                                                                                                                                                                                                                       |                                                                                                                                                                                                                                                                                                                                                                                                                                                                                                                                                            |                                                                                                                                                                                                                                                                                                                                                                                                                                                                                                                                                                                                                                                                                                                                                                                                                                                                                                   |
|--------------------------------------------------------------------------------------------------------------------------------------------------------------------------------------------------------------------------------------------------------------------------------------------|-------------------------------------------------------------------|-------------------------------------------------------------------------------------------------------------------------------------------------------------------|-------------------------------------------------------------------------------------------------------------------------------------------------------------------------------------------------------------------------------------------------------------------------------------------------------------------------------------------------------------------------------------------------------------------------------------------------------|------------------------------------------------------------------------------------------------------------------------------------------------------------------------------------------------------------------------------------------------------------------------------------------------------------------------------------------------------------------------------------------------------------------------------------------------------------------------------------------------------------------------------------------------------------|---------------------------------------------------------------------------------------------------------------------------------------------------------------------------------------------------------------------------------------------------------------------------------------------------------------------------------------------------------------------------------------------------------------------------------------------------------------------------------------------------------------------------------------------------------------------------------------------------------------------------------------------------------------------------------------------------------------------------------------------------------------------------------------------------------------------------------------------------------------------------------------------------|
| <p>1<br/>2<br/>3<br/>4<br/>5<br/>6<br/>7<br/>8<br/>9<br/>10<br/>11<br/>12<br/>13<br/>14<br/>15<br/>16<br/>17<br/>18<br/>19<br/>20<br/>21<br/>22<br/>23<br/>24<br/>25<br/>26<br/>27<br/>28<br/>29<br/>30<br/>31<br/>32</p> <p><b>Hybrid (research site-health facility)<sup>e</sup></b></p> | <p>Heffron et al. (2018)<sup>52</sup></p> <p>Kenya and Uganda</p> | <p>Research article</p> <p>To explore fertility intentions, pregnancy, and evaluated the use of PrEP and ART as periconception HIV risk reduction strategies.</p> | <p><b>Study population:</b><br/>Offered to use PrEP services</p> <p><b>Sample</b><br/><i>Sample size (total – N):</i> 1013<br/><i>Gender distribution:</i><br/>HIV-infected females: 455; HIV-uninfected males: 224; HIV infected males: 110; HIV-uninfected females: 224<br/><i>Age distribution:</i><br/>HIV-infected females: 26 (22-30); HIV-uninfected males: 30 (26-37); HIV-uninfected females: 29 (24-35); HIV-infected males: 35 (30-42)</p> | <p><b>Nature of Intervention:</b><br/>The PrEP delivery model integrated PrEP into HIV treatment services. PrEP discontinuation was encouraged once the HIV-infected partner had used ART for at least 6 months (time to achieve HIV viral suppression).</p> <p><b>Intervention components:</b><br/>Couples-based HIV prevention counselling; safer conception counselling or contraceptives; counselling and HIV testing for HIV-uninfected partner; PrEP initiation/prescription and adherence counselling; referral of HIV infected partner for ART</p> | <ul style="list-style-type: none"> <li>• Uptake and adherence to integrated PrEP and ART strategy was high with an estimated 96% reduction in HIV incidence.</li> <li>• During the 6 months preceding pregnancy, 82.9% of couples used PrEP or ART and there were no HIV seroconversions, 14.5% used some ART and/or PrEP and 2.6% used neither PrEP nor ART.</li> <li>• Among the 81 couples who were using ART only (61 couples with HIV-infected women and 20 with HIV-infected men), 91.2% of the HIV-uninfected partners had discontinued PrEP due to sustained (i.e., [6 months] ART use by their HIV infected partner.</li> <li>• Integrated PrEP and ART was readily used by HIV serodiscordant couples.</li> <li>• Widespread scale-up of safer conception counselling and services is warranted to respond to strong desires for pregnancy among HIV-affected men and women.</li> </ul> |
| <p>33<br/>34<br/>35<br/>36<br/>37<br/>38<br/>39<br/>40<br/>41<br/>42<br/>43<br/>44<br/>45<br/>46<br/>47</p> <p><b>Hybrid (research site-health facility)<sup>e</sup></b></p>                                                                                                               | <p>Ngure et al. (2016)<sup>45</sup></p> <p>Kenya</p>              | <p>Research article</p> <p>To gather insights into couples' decision-making, motivations for PrEP uptake, and experiences soon after PrEP initiation.</p>         | <p><b>Study population:</b><br/>Offered to use PrEP services</p> <p><b>Sample</b><br/><i>Sample size (total – N):</i> 40<br/><i>Gender distribution:</i> Female: 20; Male:20<br/><i>Age distribution:</i> Females: 29.1 (20-43), Males: 36.6 (27-57)</p>                                                                                                                                                                                              | <p><b>Nature of Intervention:</b> The PrEP delivery model integrated PrEP into HIV treatment services. PrEP discontinuation was encouraged once the HIV-infected partner had used ART for at least 6 months (time to achieve HIV viral suppression).</p>                                                                                                                                                                                                                                                                                                   | <ul style="list-style-type: none"> <li>• PrEP offered couples an additional strategy to reduce the risk of HIV transmission, meet their fertility desires, and cope with HIV serodiscordance.</li> <li>• Remaining HIV-negative at follow-up visits reinforced couples' decisions and</li> </ul>                                                                                                                                                                                                                                                                                                                                                                                                                                                                                                                                                                                                  |

|                                                       |                                                          |                                                                                                                                                                                   |                                                                                                                                                                                                                                                                                                                                   |                                                                                                                                                                                                                                                                                                                                                                                                                                                                                                                                                                                              |                                                                                                                                                                                                                                                                                                                                                                                                                                                                                                                                                                                                                                                                                                                                                                                 |
|-------------------------------------------------------|----------------------------------------------------------|-----------------------------------------------------------------------------------------------------------------------------------------------------------------------------------|-----------------------------------------------------------------------------------------------------------------------------------------------------------------------------------------------------------------------------------------------------------------------------------------------------------------------------------|----------------------------------------------------------------------------------------------------------------------------------------------------------------------------------------------------------------------------------------------------------------------------------------------------------------------------------------------------------------------------------------------------------------------------------------------------------------------------------------------------------------------------------------------------------------------------------------------|---------------------------------------------------------------------------------------------------------------------------------------------------------------------------------------------------------------------------------------------------------------------------------------------------------------------------------------------------------------------------------------------------------------------------------------------------------------------------------------------------------------------------------------------------------------------------------------------------------------------------------------------------------------------------------------------------------------------------------------------------------------------------------|
|                                                       |                                                          |                                                                                                                                                                                   |                                                                                                                                                                                                                                                                                                                                   | <i><b>Intervention components:</b></i> At the time of interview: time since initiating PrEP was 6.3 months and time since initiating ART was 5.6 months                                                                                                                                                                                                                                                                                                                                                                                                                                      | <p>motivated continued adherence to PrEP. Daily PrEP use supported the HIV-infected partners adherence to ART.</p> <ul style="list-style-type: none"> <li>• A positive clinical encounter (provider's advice and client-friendly services) motivated initiation and continuation of PrEP</li> </ul>                                                                                                                                                                                                                                                                                                                                                                                                                                                                             |
| <b>Hybrid (community-health facility)<sup>d</sup></b> | Koss et al. (2018) <sup>41</sup><br><br>Kenya and Uganda | Research article<br><br>To report on "early adopters" of PrEP in the Sustainable East Africa Research in Community Health (SEARCH) study in rural Uganda and Kenya. intervention. | <p><b>Study population:</b><br/>Offered to use PrEP services</p> <p><b>Sample</b></p> <p><i><b>Population:</b></i><br/>AGYW Men</p> <p><i><b>Sample size (total – N):</b></i><br/>4064</p> <p><i><b>Gender distribution:</b></i><br/>1934 females 2130 males<br/>48% females 52% males</p> <p><i><b>Age distribution:</b></i></p> | <p><i><b>Nature of Intervention:</b></i><br/>PrEP education and discussions occurred on arrival at the health campaign, with HIV counsellors and clinicians. During home-based testing, 1 staff member conducted HIV testing and counselling and provided info about PrEP.</p> <p><i><b>Intervention components:</b></i><br/>1-month community mobilization and sensitization activities on PrEP. PrEP risk score or was administered. Hybrid HIV and multi-disease testing was conducted (health campaigns &amp; home-based) with counselling and health education discussions on PrEP.</p> | <ul style="list-style-type: none"> <li>• Of 21 212 HIV-uninfected adults, 4064 were identified for PrEP (2991 by empiric risk score, 1073 by self-identified risk).</li> <li>• 739 individuals started PrEP within 30 days; 77% on the same day.</li> <li>• Among adults identified by risk score, predictors of early adoption included male sex (adjusted odds ratio 1.53; 95% confidence interval, 1.09-2.15), polygamy (1.92; 1.27-2.90), serodiscordant spouse (3.89; 1.18-12.76), self-perceived HIV risk (1.66; 1.28-2.14), and testing at health campaign versus home (5.24; 3.33-8.26).</li> <li>• Among individuals who self-identified for PrEP, predictors of early adoption included older age (2.30; 1.29-4.08) and serodiscordance (2.61; 1.01-6.76).</li> </ul> |
| <b>Hybrid (community-</b>                             | Koss et al. (2020) <sup>43</sup>                         | Research article<br><br>To assess PrEP uptake and engagement after population-                                                                                                    | <p><b>Study population:</b><br/>Offered to use PrEP services</p> <p><b>Sample</b></p>                                                                                                                                                                                                                                             | <i><b>Nature of Intervention:</b></i><br>Population-level HIV and multi-disease testing using a hybrid mobile testing approach                                                                                                                                                                                                                                                                                                                                                                                                                                                               | <ul style="list-style-type: none"> <li>• In 12935 (10% serodifferent partnership, 54% risk score, 36% self-identified risk) people</li> </ul>                                                                                                                                                                                                                                                                                                                                                                                                                                                                                                                                                                                                                                   |

|                                                       |                                                         |                                                                                                                                                                           |                                                                                                                                                                                                                                                                                                                               |                                                                                                                                                                                                                                                                                                                                                                                                                                                                                                                                                                                                                                                                                                                                                                                                                                                                                                                                                |                                                                                                                                                                                                                                                                                                                                                                                                                                                                                                                                                                                                                                                                                                                                                                                                                                                                                   |
|-------------------------------------------------------|---------------------------------------------------------|---------------------------------------------------------------------------------------------------------------------------------------------------------------------------|-------------------------------------------------------------------------------------------------------------------------------------------------------------------------------------------------------------------------------------------------------------------------------------------------------------------------------|------------------------------------------------------------------------------------------------------------------------------------------------------------------------------------------------------------------------------------------------------------------------------------------------------------------------------------------------------------------------------------------------------------------------------------------------------------------------------------------------------------------------------------------------------------------------------------------------------------------------------------------------------------------------------------------------------------------------------------------------------------------------------------------------------------------------------------------------------------------------------------------------------------------------------------------------|-----------------------------------------------------------------------------------------------------------------------------------------------------------------------------------------------------------------------------------------------------------------------------------------------------------------------------------------------------------------------------------------------------------------------------------------------------------------------------------------------------------------------------------------------------------------------------------------------------------------------------------------------------------------------------------------------------------------------------------------------------------------------------------------------------------------------------------------------------------------------------------|
| <p>health facility)<sup>d</sup></p>                   | <p>Kenya and Uganda</p>                                 | <p>level HIV testing and universal PrEP access to characterise gaps in the PrEP cascade</p>                                                                               | <p><b>Sample size (total – N):</b> 12935 (HIV-negative with elevated risk)<br/> <b>Gender distribution:</b><br/>         Female: 6459;<br/>         Male: 6476<br/> <b>Age distribution:</b><br/>         15-24: 4800;<br/>         25-34: 4712;<br/>         35-44: 1927;<br/>         45-54: 991;<br/>         ≥55: 505</p> | <p>at community health fairs, home-based testing or facilities. PrEP initiation at health fairs or at local clinic.<br/> <b>Intervention components:</b><br/> <i>Community:</i> community sensitisation, HIV testing, PrEP counselling to HIV- negative people at elevated risk (serodifferent partnership, risk score, or self-identified risk); on-site PrEP start at health fairs or same-day PrEP initiation at local clinics. <i>Home:</i> home-based testing and PrEP counselling, offer of PrEP through local clinics.<br/> <i>Local clinic:</i> Patients with HIV were asked to bring their HIV-negative or partners with unknown HIV status to the clinic for HIV testing and the offer of PrEP initiation.<br/> <i>Follow up:</i> visits included supportive delivery system with options for visits at clinic, home, or community locations. Follow up visits included: HCT, PrEP refill blood tests and adherence measurements</p> | <p>at elevated risk, 27% initiated PrEP.</p> <ul style="list-style-type: none"> <li>• 82% initiated PrEP on the same day as HIV testing, 50% of whom were men</li> <li>• 19% of AGYW (15-24 years) initiated PrEP</li> <li>• PrEP uptake was lower among individuals aged 15-24 years and mobile individuals.</li> <li>• At week 4, 64% were engaged in the programme, 49% received medication refills, and 40% self-reported adherence.</li> <li>• At week 72, 56% were engaged, 33% received a refill, and 27% self-reported adherence.</li> <li>• Inclusive risk assessment (combining serodifferent partnership, an empirical risk score, and self-identification of HIV risk) was feasible and identified individuals who could benefit from PrEP.</li> <li>• The biggest gap in the PrEP cascade was PrEP uptake, particularly for young and mobile individuals.</li> </ul> |
| <p>Hybrid (community-health facility)<sup>d</sup></p> | <p>Mayer et al. (2019)<sup>42</sup><br/><br/>Uganda</p> | <p>Research article<br/><br/>To estimate the association between distance to clinic and other transportation-related barriers on PrEP uptake and initial clinic visit</p> | <p><b>Study population:</b><br/>Offered to use PrEP services<br/> <b>Sample</b><br/> <b>Sample size (total – N):</b> 701<br/> <b>Gender distribution:</b><br/>         Female: 300;<br/>         Male: 401<br/> <b>Age distribution:</b><br/>         15-24: 339;<br/>         25-34: 242;</p>                                | <p><b>Nature of Intervention:</b> PrEP was given using a hybrid model and initiation was dependent on participant choice. PrEP could be initiated same day on-site at community health fairs or at local clinic). For those tested at home PrEP was offered within one to six months following the</p>                                                                                                                                                                                                                                                                                                                                                                                                                                                                                                                                                                                                                                         | <ul style="list-style-type: none"> <li>• Of the 701 PrEP-eligible participants, 39% started PrEP within four weeks; of these, 17% were retained at four weeks.</li> <li>• Participants with a distance to clinic of ≥2 km were less likely to start PrEP (p = 0.012) and</li> </ul>                                                                                                                                                                                                                                                                                                                                                                                                                                                                                                                                                                                               |

|                                                               |                                                                    |                                                                                                                                                                                                                                              |                                                                                                                                                                                                                                                |                                                                                                                                                                                                                                                                                                                                                                                                                                                                                                                                                                                                 |                                                                                                                                                                                                                                                                                                                                                                                                                                                                                                                                                                                                                         |
|---------------------------------------------------------------|--------------------------------------------------------------------|----------------------------------------------------------------------------------------------------------------------------------------------------------------------------------------------------------------------------------------------|------------------------------------------------------------------------------------------------------------------------------------------------------------------------------------------------------------------------------------------------|-------------------------------------------------------------------------------------------------------------------------------------------------------------------------------------------------------------------------------------------------------------------------------------------------------------------------------------------------------------------------------------------------------------------------------------------------------------------------------------------------------------------------------------------------------------------------------------------------|-------------------------------------------------------------------------------------------------------------------------------------------------------------------------------------------------------------------------------------------------------------------------------------------------------------------------------------------------------------------------------------------------------------------------------------------------------------------------------------------------------------------------------------------------------------------------------------------------------------------------|
|                                                               |                                                                    |                                                                                                                                                                                                                                              | <p>35-44:77;<br/>45-54: 991;<br/>≥45: 43</p>                                                                                                                                                                                                   | <p>community campaign through local clinics.<br/><b>Intervention components:</b> Meetings with community stakeholders to sensitise them on PrEP, at community health campaigns (CHCs), eligible HIV-negative participants at elevated risk (serodifferent partnership, risk score, or self-identified risk) were directed to a PrEP education station where they were informed about how PrEP works, interested participants were offered referral to a linkage station to make an appointment at clinic for PrEP enrolment or same-day PrEP start or a clinic appointment at a later date.</p> | <p>less likely to be retained on PrEP once initiated (<math>p = 0.024</math>)</p> <ul style="list-style-type: none"> <li>• Eligible participants (from home-based testing) who did not have the option of same-day PrEP initiation were also less likely to initiate PrEP (<math>p &lt; 0.001</math>).</li> <li>• Barriers to PrEP use: daily use of PrEP, "low/no risk of getting HIV, transportation-related barriers (clinic is too far away and travel away from home).</li> </ul>                                                                                                                                  |
| <p><b>Hybrid (community-health facility) <sup>d</sup></b></p> | <p>Camlin et al. (2020)<sup>44</sup><br/><br/>Kenya and Uganda</p> | <p>Research article<br/><br/>To explore understandings of PrEP, elucidate factors influential of demand, decisions around PrEP uptake or non-initiation, and adherence and discontinuation in population subgroups at elevated HIV risk.</p> | <p><b>Study population:</b> Offered to use PrEP services<br/><b>Sample</b><br/><b>Sample size (total – N):</b> 111<br/><b>Gender distribution:</b> Females: 65; Males: 46<br/><b>Age distribution:</b> 15-35, median age: 24 (range 17-35)</p> | <p><b>Nature of Intervention:</b> Same day PrEP initiation on-site at community health campaigns or at health facilities. 8 FGDs (4 male, 4 female groups) each with 8-12 participants; 13 IDIs with PrEP initiators and 10 IDIs with PrEP decliners<br/><b>Intervention components:</b> As per SEARCH study: Same day initiation of PrEP on-site at community health campaigns or health facilities. Transport to clinics for the PrEP initiation visit. Follow-up visits which occurred at local health facilities, participants' homes, or other community-based</p>                         | <ul style="list-style-type: none"> <li>• Gendered motivations for PrEP: young men viewed PrEP as a means to safely pursue multiple partners, while young women saw PrEP as a means to control risks in terms of engagement in transactional sex and difficulty in negotiating condom use and partner testing.</li> <li>• Uptake was hindered by HIV/ART-related stigma (colour of pill same as ART, accessing PrEP at the same facility where HIV care was provided), the need for partners permission, distance to facilities, mixed messaging on the dosing of PrEP, taking daily medications, living with</li> </ul> |

|                                                              |                                                                |                                                                                                                                                                |                                                                                                                                                                                                                                                                                                                                                                                                                                                                                                     |                                                                                                                                                                                                     |                                                                                                                                                                                                                                                                                                                                                                                                                                                                                                                                                                                                                                                                                                                                                                                             |
|--------------------------------------------------------------|----------------------------------------------------------------|----------------------------------------------------------------------------------------------------------------------------------------------------------------|-----------------------------------------------------------------------------------------------------------------------------------------------------------------------------------------------------------------------------------------------------------------------------------------------------------------------------------------------------------------------------------------------------------------------------------------------------------------------------------------------------|-----------------------------------------------------------------------------------------------------------------------------------------------------------------------------------------------------|---------------------------------------------------------------------------------------------------------------------------------------------------------------------------------------------------------------------------------------------------------------------------------------------------------------------------------------------------------------------------------------------------------------------------------------------------------------------------------------------------------------------------------------------------------------------------------------------------------------------------------------------------------------------------------------------------------------------------------------------------------------------------------------------|
|                                                              |                                                                |                                                                                                                                                                |                                                                                                                                                                                                                                                                                                                                                                                                                                                                                                     | locations of the participant's choice.                                                                                                                                                              | <p>parents or were attending school, moral prohibitions against sex among young people, desire for “proof” of efficacy by peers</p> <ul style="list-style-type: none"> <li>• Uptake was motivated by high perceived HIV risk, and beliefs that PrEP use supported life goals (completing schooling or having a family).</li> <li>• Discontinuation of PrEP was due to dissolution of partnerships/changing risk, unsupportive partners/peers, or early side effects/pill burden.</li> </ul>                                                                                                                                                                                                                                                                                                 |
| <p><b>Hybrid (community-health facility)<sup>d</sup></b></p> | <p>Koss et al. (2017)<sup>26</sup></p> <p>Kenya and Uganda</p> | <p>Conference abstract</p> <p>To evaluate barriers to the uptake of open-label PrEP offered in a population-based context in high HIV prevalence settings.</p> | <p><b>Study population:</b><br/>Offered to use PrEP services (nested in SEARCH Trial)</p> <p><b>Sample</b></p> <p><b>Population:</b><br/>Men. Women and youth</p> <p><b>Sample size (total – N):</b><br/>63 Community members: 40% men; 35% women; 25% youth 42 Clients who did not initiate PrEP: 38% women; 45% at risk for HIV by empiric score</p> <p><b>Gender distribution:</b><br/>16-53 years, median age of 28 years</p> <p><b>Age distribution:</b><br/>40% men, 35% women, 25% youth</p> | <p><b>Nature of Intervention:</b><br/>This is a cross sectional study based on SEARCH trial</p> <p><b>Intervention components:</b><br/>n/a</p> <p><b>Intervention delivery setting:</b><br/>n/a</p> | <ul style="list-style-type: none"> <li>- In communities that were offered targeted PrEP in this population-based study, multi-level barriers to the uptake of PrEP were identified.</li> <li>- In addition to barriers identified in prior studies of targeted populations, such as aspects of pill-taking, concerns about effectiveness, and partner and household---level influence, concerns about access to PrEP via health facilities or at school, opportunity costs, mobility, and misconceptions about PrEP as barriers to uptake in SEARCH communities.</li> <li>• Strategies are needed to address these barriers, such as community sensitization, expanded provision of information on PrEP, and community---based delivery mechanisms to facilitate access to PrEP.</li> </ul> |

|                                                                                                                                                                                                                                                |                                                           |                                                                                                                                                                                                                                                                           |                                                                                                                                                                                                                                                                                                                                                               |                                                                                                                                                                                                                                                                                                                                                           |                                                                                                                                                                                                                                                                                                                                                                                                                                                                                                                                                                                                                                                                                                                                                                                                                                                                |
|------------------------------------------------------------------------------------------------------------------------------------------------------------------------------------------------------------------------------------------------|-----------------------------------------------------------|---------------------------------------------------------------------------------------------------------------------------------------------------------------------------------------------------------------------------------------------------------------------------|---------------------------------------------------------------------------------------------------------------------------------------------------------------------------------------------------------------------------------------------------------------------------------------------------------------------------------------------------------------|-----------------------------------------------------------------------------------------------------------------------------------------------------------------------------------------------------------------------------------------------------------------------------------------------------------------------------------------------------------|----------------------------------------------------------------------------------------------------------------------------------------------------------------------------------------------------------------------------------------------------------------------------------------------------------------------------------------------------------------------------------------------------------------------------------------------------------------------------------------------------------------------------------------------------------------------------------------------------------------------------------------------------------------------------------------------------------------------------------------------------------------------------------------------------------------------------------------------------------------|
| <p>1<br/>2<br/>3<br/>4<br/>5<br/>6<br/>7<br/>8<br/>9<br/>10<br/>11<br/>12<br/>13<br/>14<br/>15<br/>16<br/>17<br/>18<br/>19<br/>20<br/>21<br/>22<br/>23<br/>24<br/>25<br/>26<br/>27<br/>28</p> <p><b>Hybrid (community-health facility)</b></p> | <p>Gombe et al. (2020)<sup>46</sup><br/><br/>Zimbabwe</p> | <p>Research article<br/><br/>To understand the factors that motivate clients to accept, decline, continue, or discontinue PrEP.</p>                                                                                                                                       | <p><b>Study population:</b><br/>Offered to use PrEP services<br/><b>Sample</b><br/><i>Sample size (total – N):</i> 60<br/><i>Gender distribution:</i> Female: 46; Male: 14<br/><i>Age distribution:</i> 16-25: 20%; 26-40: 60%; &gt;41: 20%</p>                                                                                                               | <p><b>Nature of Intervention:</b> PrEP was integrated at two family planning clinics. 54 IDIs with PrEP acceptors and 6 IDIs with PrEP decliners<br/><b>Intervention components:</b> HIV testing; screening for PrEP eligibility according to a tool; same day initiation of PrEP (one-month supply); follow-up visit at month 1 (three-month supply)</p> | <ul style="list-style-type: none"> <li>• Motivators to accept PrEP: High HIV risk perception, preference for PrEP over other HIV prevention methods, perceived severity of living with HIV, confidence in PrEP</li> <li>• Barriers to accepting PrEP: fear of pill burden or impact of pills, wanting partners consent or fearing partner reaction to PrEP, feeling satisfied with current method of HIV prevention</li> <li>• Motivators to continue PrEP: focus on original motivation, establishing daily pill routine, accessible PrEP pill storage, planning ahead before travelling out of town, partner or facility support</li> <li>- Barriers to continuing PrEP: being unaccustomed to taking pills, religious issues, travel out of town, clinic schedule/hours, lack of transport funds, misunderstanding dosing guidance, side effects</li> </ul> |
| <p>29<br/>30<br/>31<br/>32<br/>33<br/>34<br/>35<br/>36<br/>37<br/>38<br/>39<br/>40<br/>41<br/>42<br/>43<br/>44<br/>45<br/>46<br/>47</p> <p><b>Health facility</b></p>                                                                          | <p>Sack et al (2020)<sup>55</sup><br/><br/>Mozambique</p> | <p>Research article<br/><br/>To explore the perspectives, attitudes, and experiences of HIV serodiscordant partners taking PrEP and develop a messaging campaign to improve PrEP uptake in rural Mozambique to reduce HIV transmission among serodiscordant partners.</p> | <p><b>Study population:</b><br/>Offered to use PrEP services<br/><b>Sample</b><br/><i>Sample size (total – N):</i> 20<br/><i>Gender distribution:</i> Female: 11; Male: 9<br/><i>Age distribution:</i> Median age 35, interquartile range 26.5-37.5). Female: median age 32, interquartile range 25.5-36; male: median age 36, interquartile range 31-38.</p> | <p><b>Nature of Intervention:</b> Stories will be presented to discordant couples to try to improve PrEP uptake and reduce incident HIV infections.<br/><b>Intervention components:</b> Three oral stories designed to educate, empower, and normalize PrEP use.</p>                                                                                      | <ul style="list-style-type: none"> <li>• Individual factors influencing PrEP uptake and adherence: love for one's partner, knowledge about PrEP and the belief it is effective, fear of HIV and PrEP stigma</li> <li>• Interpersonal factors affecting PrEP uptake: desire to protect family, partner support and relationship strength, Overcoming the fear of stigma</li> </ul>                                                                                                                                                                                                                                                                                                                                                                                                                                                                              |

|                  |                                                         |                                                                                                                                              |                                                                                                                                                                                                                                                                                                                                                                                                                                                                                                                                                                                                   |                                                                                                                                 |                                                                                                                                                                                                                                                                                                                                                                                                                                                                                                                                                                                                                   |
|------------------|---------------------------------------------------------|----------------------------------------------------------------------------------------------------------------------------------------------|---------------------------------------------------------------------------------------------------------------------------------------------------------------------------------------------------------------------------------------------------------------------------------------------------------------------------------------------------------------------------------------------------------------------------------------------------------------------------------------------------------------------------------------------------------------------------------------------------|---------------------------------------------------------------------------------------------------------------------------------|-------------------------------------------------------------------------------------------------------------------------------------------------------------------------------------------------------------------------------------------------------------------------------------------------------------------------------------------------------------------------------------------------------------------------------------------------------------------------------------------------------------------------------------------------------------------------------------------------------------------|
|                  |                                                         |                                                                                                                                              |                                                                                                                                                                                                                                                                                                                                                                                                                                                                                                                                                                                                   |                                                                                                                                 | to seek support from family and friends                                                                                                                                                                                                                                                                                                                                                                                                                                                                                                                                                                           |
| <b>Community</b> | Bassett et al. (2018) <sup>48</sup><br><br>South Africa | Research article<br><br>To assess the acceptability and feasibility of offering family planning and HIV prevention services at salons.       | <b>Study population:</b><br>Never been offered to use PrEP services (hypothetical opinions related to PrEP)<br><b>Sample</b><br><b>Population:</b><br>17 hair salons, 92 stylists, 326 clients<br><b>Sample size (total – N):</b><br>Salons (N = 17), Owners (N = 17), Stylists (N = 92), Female clients (N = 326)<br><b>Gender distribution:</b><br>100% of salon clients were female 82% of stylists were female 65% of owners were female<br><b>Age distribution:</b><br>Median age (IQR): Salon clients: 28 (IQR 24 to 33); Stylists: 29 (26-32) Owners: 36 (33-43)                           | <b>Nature of Intervention:</b><br>n/a<br><b>Intervention components:</b><br>n/a<br><b>Intervention delivery setting:</b><br>n/a | <ul style="list-style-type: none"> <li>Overall, most owners, stylists, and clients were willing to receive contraception and PrEP from a nurse in hair salons in and around Umlazi Township.</li> <li>Frequent client visits and willingness of stylists to offer health education suggest that a stylist initiated, nurse-supported health intervention could be feasible in the salon setting.</li> <li>Hair salons represent a promising venue for reaching young women in sub-Saharan Africa at risk of unintended pregnancy and HIV infection.</li> </ul>                                                    |
| <b>Community</b> | Bassett et al. (2019) <sup>47</sup><br><br>South Africa | Research article<br><br>To assess the acceptability of nurse-offered contraceptive and PrEP services at hair salons in Durban, South Africa. | <b>Study population:</b><br>Never been offered to use PrEP services (hypothetical opinions related to PrEP)<br><b>Sample</b><br><b>Population:</b><br>Clients of hair salons-Females, mean age 27 years, hair salon owners, hair stylists<br><b>Sample size (total – N):</b><br>Clients=42 (all female) Stylists=43 (40 female; 3 male) Salon owners=10 (8 female; 2 male)<br><b>Gender distribution:</b><br>Clients: 42 Females Stylists: 40 Females; 3 Males Owners: 8 Females; 2 Males<br><b>Age distribution:</b><br>Clients: M=27.1; SD=6.3 Stylists: M-29.6; SD=5.1 Owners: M=40.3; SD; 7.6 | <b>Nature of Intervention:</b><br>n/a<br><b>Intervention components:</b><br>n/a<br><b>Intervention delivery setting:</b><br>n/a | <ul style="list-style-type: none"> <li>Participants felt that incentives would be beneficial to program enrolment, if not necessary, to garner interest among clients. One client noted that incentives have become an expected part of research</li> <li>Overall, participants liked the idea of receiving personal SMS messages and having WhatsApp groups as adherence supports. Clients preferred SMS messages for direct adherence motivation because they are more private.</li> <li>One client felt that an SMS could also serve as an automated daily reminder for women on PrEP to take their</li> </ul> |

1  
2  
3  
4  
5  
6  
7  
8  
9  
10  
11  
12  
13  
14  
15  
16  
17  
18  
19  
20  
21  
22  
23  
24  
25  
26  
27  
28  
29  
30  
31  
32  
33  
34  
35  
36  
37  
38  
39  
40  
41  
42  
43  
44  
45  
46  
47

|                  |                                                   |                                                                                                                                         |                                                                                                                                                                                                                                                                                                                                                                                                                                                                                                                                                                                                 |                                                                                                      |                                                                                                                                                                                                                                                                                                                                                                                                                                                                                                                                                                                                                                                                                 |
|------------------|---------------------------------------------------|-----------------------------------------------------------------------------------------------------------------------------------------|-------------------------------------------------------------------------------------------------------------------------------------------------------------------------------------------------------------------------------------------------------------------------------------------------------------------------------------------------------------------------------------------------------------------------------------------------------------------------------------------------------------------------------------------------------------------------------------------------|------------------------------------------------------------------------------------------------------|---------------------------------------------------------------------------------------------------------------------------------------------------------------------------------------------------------------------------------------------------------------------------------------------------------------------------------------------------------------------------------------------------------------------------------------------------------------------------------------------------------------------------------------------------------------------------------------------------------------------------------------------------------------------------------|
|                  |                                                   |                                                                                                                                         |                                                                                                                                                                                                                                                                                                                                                                                                                                                                                                                                                                                                 |                                                                                                      | <p>medication. A few participants also noted that SMS would be more accessible than WhatsApp given data constraints.</p> <ul style="list-style-type: none"> <li>• Overall, participants were enthusiastic about the program. Convenience and a conducive environment were noted as facilitators to receiving health services in the hair salon; attention will have to be directed to establishing privacy and program legitimacy.</li> <li>• Hair salons represent an innovative venue for reaching young women at high-risk for unintended pregnancy and HIV infection.</li> </ul>                                                                                            |
| <b>Community</b> | Lubwama et al. (2019) <sup>49</sup><br><br>Uganda | Conference abstract<br><br>A review of PrEP data from PEPFAR Data for Transparency Impact Monitoring (DATIM) for July 2017 to June 2018 | <p><b>Study population:</b><br/>Offered to use PrEP services</p> <p><b>Sample</b><br/><b>Population:</b> Key populations including sex workers (SW), men who have sex with men (MSM), transgender persons (TG) and other high-risk groups (fisher folk [FF], discordant couples [DC], truckers, adolescent girls and young women [AGYW] and people who inject drugs).</p> <p><b>Sample size (total – N):</b><br/>Initiated PrEP (6 sites) 3,846<br/>PrEP clients (1 community): 1538</p> <p><b>Gender distribution:</b><br/>Not mentioned</p> <p><b>Age distribution:</b><br/>Not mentioned</p> | <p><b>Intervention components:</b><br/>Drop-in centres (DINCs), Community based outreach centres</p> | <ul style="list-style-type: none"> <li>• 3,846 individuals-initiated PrEP; 2,568 (67.2%) SW, 327 (8.5%) MSM, 15 (0.4%) TG, and 918 (23.8%) other high-risk groups</li> <li>• One community had 1538 PrEP clients: 58.1% SW, 25.4% FF, 7.4% DC and 0.5% MSM.</li> <li>• Return rates for PrEP were higher among DC (3 months:56.9%, 6 months:46.8%) and low among SW (3 months 37.5%, 6 months 26.3%) and FF (3months 16.4%, 6months 14.2%).</li> <li>• The majority (69.2%, 1064/1538) were reached through outreach models versus fixed public health facilities</li> <li>• More SW than other KP and high-risk groups were reached with PrEP. Retention at 3 and 6</li> </ul> |



|                      |                                                        |                                                                                                                                                                                             |                                                                                                                                                                                                                                                                                                                                                                                                                                                                                                                                                                                                                                                       |                                                                                                                                                                                                                                                                                                                                                                                                                                                                                                                                                                                                                                   |                                                                                                                                                                                                                                                                                                                                                                                                                                                                                                                                                                                                                                            |
|----------------------|--------------------------------------------------------|---------------------------------------------------------------------------------------------------------------------------------------------------------------------------------------------|-------------------------------------------------------------------------------------------------------------------------------------------------------------------------------------------------------------------------------------------------------------------------------------------------------------------------------------------------------------------------------------------------------------------------------------------------------------------------------------------------------------------------------------------------------------------------------------------------------------------------------------------------------|-----------------------------------------------------------------------------------------------------------------------------------------------------------------------------------------------------------------------------------------------------------------------------------------------------------------------------------------------------------------------------------------------------------------------------------------------------------------------------------------------------------------------------------------------------------------------------------------------------------------------------------|--------------------------------------------------------------------------------------------------------------------------------------------------------------------------------------------------------------------------------------------------------------------------------------------------------------------------------------------------------------------------------------------------------------------------------------------------------------------------------------------------------------------------------------------------------------------------------------------------------------------------------------------|
|                      |                                                        |                                                                                                                                                                                             |                                                                                                                                                                                                                                                                                                                                                                                                                                                                                                                                                                                                                                                       |                                                                                                                                                                                                                                                                                                                                                                                                                                                                                                                                                                                                                                   | <p>months was low for sex workers and fisherfolk, somewhat higher for discordant couples.</p> <ul style="list-style-type: none"> <li>• Outreach approaches should be scaled up to reach more KP clients with PrEP. Retention strategies should be strengthened, especially for sex workers and fisherfolk, who may be highly mobile.</li> </ul>                                                                                                                                                                                                                                                                                            |
| <b>Community</b>     | Morton et al (2020) <sup>53</sup><br><br>South Africa  | <p>Research article</p> <p>To understand how to effectively create awareness, stimulate interest, and increase uptake of PrEP.</p>                                                          | <p><b>Study population:</b><br/>Never been offered to use PrEP services (hypothetical opinions related to PrEP)</p> <p><b>Sample</b><br/><b>Sample size (total – N):</b> 385<br/>Quantitative: 320<br/>Qualitative: 28 key stakeholders; 11 PrEP-naïve young, 10 PrEP-experienced women, five older women living with HIV, four men, seven key informants</p> <p><b>Gender distribution:</b><br/>Female 100% in household surveys</p> <p><b>Age distribution:</b><br/>Quantitative: 20 (18, 23) Qualitative: PrEP-naïve young women (aged 16-25), PrEP-experienced women (aged 16-29), older women living with HIV (aged 26-32), men (aged 25-35)</p> | <p><b>Nature of Intervention:</b><br/>Young women were shown a 90-second PrEP demand creation video and two informational brochures and then asked to self-administer a short survey that included questions on demographics, sexual relationships, risk taking, HIV risk perception, PrEP interest and knowledge, and their opinions about the video..</p> <p><b>Intervention components:</b><br/>Research staff visited houses up to three times, requesting to speak with the young woman household resident. Young women who agreed to participate were shown the video and then asked to self-administer a short survey.</p> | <p><b>Quantitative</b></p> <ul style="list-style-type: none"> <li>• Most reported interest in learning more about PrEP (67.7% 'definitely interested' and 9.4% 'somewhat interested') and taking PrEP (56.4% 'definitely interested' and 12.5% 'somewhat interested').</li> <li>• Factors significantly associated with interest in taking PrEP were having a primary partner with whom they regularly have sex (80.0% vs. 65.2% without a primary partner; adjusted odds ratio (AOR)=3.1, 95% CI: 1.3, 7.0) and being in a sexual partnership for &lt;6 months (86.8% vs. 68.5% for &gt;12 months; AOR=3.0, 95% CI: 1.2, 7.3).</li> </ul> |
| <b>Research site</b> | Heffron et al. (2018) <sup>40</sup><br><br>East Africa | <p>Research article</p> <p>To present estimates of effectiveness and patterns of PrEP use within a two-year demonstration project of PrEP for HIV- negative members of heterosexual HIV</p> | <p><b>Study population:</b><br/>Offered to use PrEP services</p> <p><b>Sample</b><br/><b>Population:</b><br/>Serodiscordant couples<br/><b>Sample size (total – N):</b><br/>1010 couples<br/><b>Gender distribution:</b></p>                                                                                                                                                                                                                                                                                                                                                                                                                          | <p><b>Nature of Intervention:</b><br/>PrEP was offered at enrolment at research site to all HIV-negative participants as PrEP with a daily dosing schedule; participants electing not to initiate PrEP at enrolment were</p>                                                                                                                                                                                                                                                                                                                                                                                                      | <ul style="list-style-type: none"> <li>• 97% of HIV-negative partners-initiated PrEP.</li> <li>• Median duration of PrEP use was 12 months (IQR 6-18)</li> <li>• Adherence: 71% of HIV-negative participants took ≥80% of expected doses</li> </ul>                                                                                                                                                                                                                                                                                                                                                                                        |

|                                  |                                                         |                                                                                                                                                                                               |                                                                                                                                                                                                                                                                                                        |                                                                                                                                                                                                                                                                                                                                                                        |                                                                                                                                                                                                                                                                                                                                                                                                                                                                                                                                                                                                                        |
|----------------------------------|---------------------------------------------------------|-----------------------------------------------------------------------------------------------------------------------------------------------------------------------------------------------|--------------------------------------------------------------------------------------------------------------------------------------------------------------------------------------------------------------------------------------------------------------------------------------------------------|------------------------------------------------------------------------------------------------------------------------------------------------------------------------------------------------------------------------------------------------------------------------------------------------------------------------------------------------------------------------|------------------------------------------------------------------------------------------------------------------------------------------------------------------------------------------------------------------------------------------------------------------------------------------------------------------------------------------------------------------------------------------------------------------------------------------------------------------------------------------------------------------------------------------------------------------------------------------------------------------------|
|                                  |                                                         | serodiscordant couples in East Africa.                                                                                                                                                        | Males: 1010<br>Females 1010<br><b>Age distribution:</b><br>HIV-: Age, years 30 (26, 36)<br>HIV+: Age, years 28 (23, 35)                                                                                                                                                                                | offered PrEP initiation at subsequent visits<br><b>Intervention components:</b> N/A<br><br><b>Intervention delivery setting:</b><br>Research site                                                                                                                                                                                                                      | <ul style="list-style-type: none"> <li>95% reduction (95% CI 86-98%, p&lt;0.0001) in HIV incidence, relative to estimated HIV incidence for the population in the absence of PrEP integrated into HIV treatment services.</li> </ul>                                                                                                                                                                                                                                                                                                                                                                                   |
| <b>Research site<sup>e</sup></b> | Ware et al. (2018) <sup>54</sup><br><br>Uganda          | Research article<br><br>To evaluate the integrated strategy of delivering PrEP & ART to find out why it was successful.                                                                       | <b>Study population:</b><br>Offered to use PrEP services<br><b>Sample</b><br><b>Sample size (total – N):</b> 93 couples<br><b>Gender distribution:</b> Female HIV-uninfected partner: (46%)<br><b>Age distribution:</b><br>HIV uninfected partner: 31 (26 to 37)<br>HIV infected partner 31 (25 to 37) | <b>Nature of Intervention:</b> The integrated strategy offered time-limited PrEP to uninfected partners as a "bridge" to long-term ART in the infected partner. Uninfected partners were offered PrEP at baseline and encouraged to discontinue once infected partners had used ART for six months.<br><b>Intervention components:</b><br>PrEP was integrated with ART | <ul style="list-style-type: none"> <li>Couples viewed in services as hope for staying together, attending joint follow up appointments together increased mutual support, and travelling and waiting room time provided an opportunity for discussion, reflection and joint decision making.</li> <li>Concern for partner wellbeing was a reason for initiating ART whilst the simultaneous use of ARVs turned management of HIV into a shared experience</li> <li>Couples devised joint strategies for adhering to PrEP and ART such as mutual reminders and emotional and material support for adherence.</li> </ul> |
| <b>Research site</b>             | Atujuna et al. (2018) <sup>27</sup><br><br>South Africa | Research article<br><br>To explore acceptability and preferences for New biomedical prevention technologies (NPTs) among key and other vulnerable populations in two South African townships. | <b>Study population:</b><br>Never been offered to use PrEP services (hypothetical opinions related to PrEP)<br><b>Sample</b><br><b>Sample size (total – N)</b><br>Adolescents=14<br><b>Gender distribution:</b><br>Heterosexual women=10 Heterosexual men=9                                            | <b>Nature of Intervention:</b><br>n/a<br><b>Intervention components:</b><br>n/a<br><b>Intervention delivery setting:</b><br>n/a                                                                                                                                                                                                                                        | <ul style="list-style-type: none"> <li>Different product preferences and motivations emerged by population based on similarity to existing practices and contexts of vulnerability.</li> <li>Adult women and female adolescents preferred a vaginal ring and HIV vaccine, motivated by longer duration of protection to mitigate feared repercussions from male partners, including threats to their marriage and</li> </ul>                                                                                                                                                                                           |

|                                  |                                                                  |                                                                                                                                                                                                               |                                                                                                                                                                                                                                                                                                                                                                              |                                                                                                                                                                                                                                                                                                                                                                                                                                                                                                                                                                                                |                                                                                                                                                                                                                                                                                                                                                                                                                                                                                                                                                                                                                                                                                                                                          |
|----------------------------------|------------------------------------------------------------------|---------------------------------------------------------------------------------------------------------------------------------------------------------------------------------------------------------------|------------------------------------------------------------------------------------------------------------------------------------------------------------------------------------------------------------------------------------------------------------------------------------------------------------------------------------------------------------------------------|------------------------------------------------------------------------------------------------------------------------------------------------------------------------------------------------------------------------------------------------------------------------------------------------------------------------------------------------------------------------------------------------------------------------------------------------------------------------------------------------------------------------------------------------------------------------------------------------|------------------------------------------------------------------------------------------------------------------------------------------------------------------------------------------------------------------------------------------------------------------------------------------------------------------------------------------------------------------------------------------------------------------------------------------------------------------------------------------------------------------------------------------------------------------------------------------------------------------------------------------------------------------------------------------------------------------------------------------|
|                                  |                                                                  |                                                                                                                                                                                                               |                                                                                                                                                                                                                                                                                                                                                                              |                                                                                                                                                                                                                                                                                                                                                                                                                                                                                                                                                                                                | <p>safety, and a context of ubiquitous rape.</p> <ul style="list-style-type: none"> <li>• Male adolescents preferred an HIV vaccine, seen as protection in serodiscordant relationships and convenient in obviating the HIV stigma and cost involved in buying condoms.</li> <li>• Adult men preferred PrEP, given familiarity with oral medications and mistrust of injections, seen as enabling serodiscordant couples to have a child.</li> </ul>                                                                                                                                                                                                                                                                                     |
| <b>Research site<sup>e</sup></b> | <p>Baeten et al. (2016)<sup>50</sup></p> <p>Kenya and Uganda</p> | <p>Research article</p> <p>To understand the delivery feasibility and uptake of, as well as adherence to, an integrated package of ART and PrEP among high-risk heterosexual HIV-1-serodiscordant couples</p> | <p><b>Study population:</b><br/>Offered to use PrEP services</p> <p><b>Sample</b><br/><i>Sample size (total – N)</i><br/>1013 serodiscordant couples</p> <p><b>Gender distribution:</b><br/>HIV-1-uninfected partner Male: 679 (67%)</p> <p><b>Age distribution:</b><br/>HIV-1-uninfected partner Age &lt;25 y=207 (20%), HIV-1-infected partner Age &lt;25 y= 317 (31%)</p> | <p><b>Nature of Intervention:</b><br/>HIV- partners were offered PrEP which was provided at the study sites, as PrEP was not available otherwise in Kenya and Uganda during the study period. ART was offered at the study site or by referral to another HIV-1 care center of their choice</p> <p><b>Intervention components:</b></p> <ul style="list-style-type: none"> <li>- Couples were offered antiretroviral medications</li> <li>- Counselling on HIV-1 prevention benefits</li> </ul> <p>PrEP discontinued 6 months after the infected partner initiated antiretroviral treatment</p> | <ul style="list-style-type: none"> <li>• ART was initiated by 789 (78%) HIV-1-infected partners.</li> <li>• 960/1 013 (95%) HIV-uninfected partners-initiated PrEP at enrolment, and 2% initiated PrEP at a later visit.</li> <li>• Among those initiating PrEP at enrolment and attending the month 1 and 3 visits, 840 (97%) and 792 (94%) continued to receive PrEP.</li> <li>• Adherence to PrEP measured by pill counts of returned, unused pills, indicated that 95% of dispensed pills had been taken as expected and 88% of periods between study visits had adherence &gt;80%.</li> <li>• 14 initially HIV-1-seronegative partners seroconverted during follow-up (12 were infected at the time of study enrolment).</li> </ul> |

|                             |                                                             |                                                                                                                                                                                                                |                                                                                                                                                                                                                                                                                                   |                                                                                                                                                                                                                                                                                                                                                                                                                                                                                                                                                                                                                                                                                                                                                                                                                                                |                                                                                                                                                                                                                                                                                                                                                                                                                                                                                                                                                                                                                                                                                                                                                                                                                                                                                                                                   |
|-----------------------------|-------------------------------------------------------------|----------------------------------------------------------------------------------------------------------------------------------------------------------------------------------------------------------------|---------------------------------------------------------------------------------------------------------------------------------------------------------------------------------------------------------------------------------------------------------------------------------------------------|------------------------------------------------------------------------------------------------------------------------------------------------------------------------------------------------------------------------------------------------------------------------------------------------------------------------------------------------------------------------------------------------------------------------------------------------------------------------------------------------------------------------------------------------------------------------------------------------------------------------------------------------------------------------------------------------------------------------------------------------------------------------------------------------------------------------------------------------|-----------------------------------------------------------------------------------------------------------------------------------------------------------------------------------------------------------------------------------------------------------------------------------------------------------------------------------------------------------------------------------------------------------------------------------------------------------------------------------------------------------------------------------------------------------------------------------------------------------------------------------------------------------------------------------------------------------------------------------------------------------------------------------------------------------------------------------------------------------------------------------------------------------------------------------|
| <p><b>Research site</b></p> | <p>Heffron et al. (2019)<sup>51</sup></p> <p>Kenya</p>      | <p>Research article</p> <p>To determine uptake, use and effectiveness of a comprehensive safer conception intervention among HIV-serodiscordant couples with immediate fertility desires.</p>                  | <p><b>Study population:</b><br/>Offered to use PrEP services</p> <p><b>Sample Population:</b><br/>Serodiscordant couples</p> <p><b>Sample size (total – N):</b><br/>74</p> <p><b>Gender distribution:</b><br/>HIV-negative females/HIV positive males= 54%</p>                                    | <p><b>Nature of Intervention:</b><br/>Couples attended monthly visits at the study clinic prior to pregnancy and quarterly visits during pregnancy. Couples were followed for 12 months or until the end of pregnancy. During all visits, couples received counselling about HIV prevention, information about how to track women's menstrual cycles and identify peak fertility days and how to conduct vaginal self-insemination</p> <p><b>Intervention components:</b><br/>The intervention package included antiretroviral therapy (ART) for HIV-positive partners, oral pre-exposure prophylaxis (PrEP) for HIV-negative partners, daily fertility and sexual behaviour tracking via short message service (SMS) surveys, counselling on self-insemination, and referrals for voluntary medical male circumcision and fertility care.</p> | <ul style="list-style-type: none"> <li>• Of the 74 enrolled couples, 54% were HIV-negative female/HIV-positive male couples.</li> <li>• Prior to pregnancy, 100% of partners living with HIV used ART and 100% of HIV-negative partners-initiated PrEP.</li> <li>• One-month preceding pregnancy, 80.9% of HIV-positive partners were virally suppressed and 81.4% of HIV-negative partners were highly adherent to PrEP.</li> <li>• 42.6% pregnancies were protected using all four strategies i.e., men were circumcised, high adherence to PrEP, ART and timed condomless sex.</li> <li>• In addition to male circumcision, seven pregnancies (14.9%) were also protected by high adherence to PrEP and ART, 5 (10.6%) were protected by PrEP and timed condomless sex.</li> <li>• 0 HIV seroconversions (95% CI 0.0 to 6.0 per 100-person years) were observed indicating a 100% reduction in HIV risk (p = 0.04).</li> </ul> |
| <p><b>Research Site</b></p> | <p>Minnis et al (2020)<sup>56</sup></p> <p>South Africa</p> | <p>Research article</p> <p>Examined youths' preferences for key attributes of long-acting PrEP, with a focus on characteristics pertinent to product delivery alongside key modifiable product attributes.</p> | <p><b>Study population:</b><br/>Never been offered to use PrEP services (hypothetical opinions related to PrEP)</p> <p><b>Sample</b><br/><b>Sample size (total – N):</b> 807</p> <p><b>Gender distribution:</b><br/>Female: 401 (50%);<br/>Men who have sex with women only (MSW): 216 (27%).</p> | <p><b>Nature of Intervention:</b><br/>Participants were asked to choose between two hypothetical PrEP products composed of five attributes product form (injection, implant); dosing frequency (two, six or twelve months); where to obtain the product (clinic, pharmacy, community</p>                                                                                                                                                                                                                                                                                                                                                                                                                                                                                                                                                       | <ul style="list-style-type: none"> <li>• All three subgroups had strong preference for a product with a one-year duration over two months (p &lt; 0.001).</li> <li>• MSW placed the most importance on dosing frequency, with it being five times more important than any other attribute.</li> </ul>                                                                                                                                                                                                                                                                                                                                                                                                                                                                                                                                                                                                                             |

|                      |                                                  |                                                                                                                                                                                        |                                                                                                                                                                                                                                                                                     |                                                                                                                                                                                                                                                                                                                                                                                                                                                                                                                                                                                           |                                                                                                                                                                                                                                                                                                                                                                                                                                                                                                                                                                                                                                                                                                                                                                                                                                                                                                |
|----------------------|--------------------------------------------------|----------------------------------------------------------------------------------------------------------------------------------------------------------------------------------------|-------------------------------------------------------------------------------------------------------------------------------------------------------------------------------------------------------------------------------------------------------------------------------------|-------------------------------------------------------------------------------------------------------------------------------------------------------------------------------------------------------------------------------------------------------------------------------------------------------------------------------------------------------------------------------------------------------------------------------------------------------------------------------------------------------------------------------------------------------------------------------------------|------------------------------------------------------------------------------------------------------------------------------------------------------------------------------------------------------------------------------------------------------------------------------------------------------------------------------------------------------------------------------------------------------------------------------------------------------------------------------------------------------------------------------------------------------------------------------------------------------------------------------------------------------------------------------------------------------------------------------------------------------------------------------------------------------------------------------------------------------------------------------------------------|
|                      |                                                  |                                                                                                                                                                                        | <p>Men who have sex with men MSM): 190 (23%)</p> <p><b>Age distribution:</b><br/>Median age (IQR):<br/>Female: 21 (19 to 22);<br/>men who have sex with women only: 21 (19 to 22) men who have sex with men: 20 (19 to 22)</p>                                                      | <p>distribution, mobile clinic - all models for current HIV prevention and contraceptive service delivery); pain involved with injection or insertion (mild, moderate) and delivery location on the body (arm, buttock, thigh).</p> <p><b>Intervention components:</b><br/>Participants completed interviews on a tablet computer. The survey first introduced each attribute individually with both visual and narrative descriptions. Participants were then presented with nine DCE choice questions, each one a unique choice<br/><b>NB:</b> PrEP was not provided in this study.</p> | <ul style="list-style-type: none"> <li>• Females had greater preference for a single injection over an implant compared to MSW (<math>p \leq 0.004</math>).</li> <li>• Females and MSW expressed more preference for two injections compared with implants (<math>p \leq 0.009</math>).</li> <li>• Females preferred using a product that was offered at a health clinic over accessing it at a pharmacy (<math>p &lt; 0.001</math>).</li> <li>• All youth preferred product insertion in the arm (<math>p &lt; 0.001</math>).</li> <li>• Females disliked insertion in the thigh and both MSW and MSM disliked insertion on the buttocks (<math>p = 0.01</math>).</li> <li>• Youth indicated strong preferences for longer duration products.</li> </ul> <p>Each attribute nonetheless influenced preferences, offering insight into trade-offs that inform long-acting PrEP development.</p> |
| <b>Other</b>         |                                                  |                                                                                                                                                                                        |                                                                                                                                                                                                                                                                                     |                                                                                                                                                                                                                                                                                                                                                                                                                                                                                                                                                                                           |                                                                                                                                                                                                                                                                                                                                                                                                                                                                                                                                                                                                                                                                                                                                                                                                                                                                                                |
| <b>Not described</b> | Jani et al. (2018) <sup>59</sup><br><br>Tanzania | Conference abstract<br><br>To describe support for PrEP use among male partners of AGYW in Tanzania via a qualitative comparative analysis of AGYW's and male partners of AGYW's views | <p><b>Study population:</b><br/>Never been offered to use PrEP services (hypothetical opinions related to PrEP)</p> <p><b>Sample</b><br/><b>Sample size (total – N):</b> not described<br/><b>Gender distribution:</b> not described<br/><b>Age distribution:</b> not described</p> | <p><b>Nature of Intervention:</b> Prior to IDIs and FGDs participants were acquainted with PrEP, by sharing a visual, standardized script of PrEP information with them. 24 IDIs and 4 FGDs with AGYW; 16 IDIs with men</p> <p><b>Intervention components:</b><br/>PrEP for AGYW</p>                                                                                                                                                                                                                                                                                                      | <ul style="list-style-type: none"> <li>• AGYW and male partners agreed that most male partners would be willing to support PrEP use by AGYW.</li> <li>• However, male partner support might be contingent on their early involvement in the decision-making process regarding PrEP.</li> <li>• Early inclusion was perceived to remove suspicion of infidelity and alleviate negative consequences associated with</li> </ul>                                                                                                                                                                                                                                                                                                                                                                                                                                                                  |

1  
2  
3  
4  
5  
6  
7  
8  
9  
10  
11  
12  
13  
14  
15  
16  
17  
18  
19  
20  
21  
22  
23  
24  
25  
26  
27  
28  
29  
30  
31  
32  
33  
34  
35  
36  
37  
38  
39  
40  
41  
42  
43  
44  
45  
46  
47

|                      |                                                    |                                                                                                                                          |                                                                                                                                                                                                                                                                                                 |                                                                                                                                                                                                                                                                                               |                                                                                                                                                                                                                                                                                                                                                                                                                                                                                                                                                                                                                                                                                                                                                                                            |
|----------------------|----------------------------------------------------|------------------------------------------------------------------------------------------------------------------------------------------|-------------------------------------------------------------------------------------------------------------------------------------------------------------------------------------------------------------------------------------------------------------------------------------------------|-----------------------------------------------------------------------------------------------------------------------------------------------------------------------------------------------------------------------------------------------------------------------------------------------|--------------------------------------------------------------------------------------------------------------------------------------------------------------------------------------------------------------------------------------------------------------------------------------------------------------------------------------------------------------------------------------------------------------------------------------------------------------------------------------------------------------------------------------------------------------------------------------------------------------------------------------------------------------------------------------------------------------------------------------------------------------------------------------------|
|                      |                                                    |                                                                                                                                          |                                                                                                                                                                                                                                                                                                 |                                                                                                                                                                                                                                                                                               | <p>late or inadvertent disclosure of PrEP use.</p> <ul style="list-style-type: none"> <li>• AGYW suggested potential social harms (relationship dissolution, loss of financial support, and verbal and physical violence) if male partners are not involved whilst male partners denied such potential extreme consequences.</li> <li>• Male participants recommended strategies on gaining men’s support of PrEP including providing education to men on PrEP, equipping AGYW with skills to educate their partners, couples counselling by providers, provision of PrEP for men, and community education and sensitization.</li> <li>• Educating male partners about PrEP and engaging them in implementation activities should be part of PrEP roll-out strategies for AGYW.</li> </ul> |
| <b>Not described</b> | Makyao et al. (2018) <sup>60</sup><br><br>Tanzania | Conference abstract<br><br>To explore how social norms and gendered parenting roles might influence parental support of AGYW's PrEP use. | <p><b>Study population:</b><br/>Never been offered to use PrEP services (hypothetical opinions related to PrEP)</p> <p><b>Sample</b><br/><i>Sample size (total – N):</i> 55<br/><i>Gender distribution:</i> Female parents: 28; Male parents: 27<br/><i>Age distribution:</i> not described</p> | <p><b>Nature of Intervention:</b> Prior to IDIs and FGDs participants were acquainted with PrEP, by sharing a visual, standardized script of PrEP information with them. 4 FGDs with male parents and 4 FGDs with female parents</p> <p><b>Intervention components:</b><br/>PrEP for AGYW</p> | <ul style="list-style-type: none"> <li>• Parents supported PrEP availability recognizing AGYW's high risk of HIV due to limited power to negotiate preventative behaviours and frequent violence in sexual relationships.</li> <li>• Differential parenting roles influenced the type of support. Men noted shame and embarrassment in communicating with their</li> </ul>                                                                                                                                                                                                                                                                                                                                                                                                                 |

|                         |                                                      |                                                                                                                                                                                                        |                                                                                                                                                                                                                                                                                                                                                 |                                                                                                                                                   |                                                                                                                                                                                                                                                                                                                                                                                                                                                                                                                                                                                                                  |
|-------------------------|------------------------------------------------------|--------------------------------------------------------------------------------------------------------------------------------------------------------------------------------------------------------|-------------------------------------------------------------------------------------------------------------------------------------------------------------------------------------------------------------------------------------------------------------------------------------------------------------------------------------------------|---------------------------------------------------------------------------------------------------------------------------------------------------|------------------------------------------------------------------------------------------------------------------------------------------------------------------------------------------------------------------------------------------------------------------------------------------------------------------------------------------------------------------------------------------------------------------------------------------------------------------------------------------------------------------------------------------------------------------------------------------------------------------|
|                         |                                                      |                                                                                                                                                                                                        |                                                                                                                                                                                                                                                                                                                                                 |                                                                                                                                                   | <p>daughters about relationships and sex.</p> <ul style="list-style-type: none"> <li>• Social norms around adolescent sexuality influenced parental support. Parents were wary of being viewed as condoning pre-marital sexual activity, while they worried that AGYW could be stigmatized as promiscuous.</li> <li>• Parents recommended strategies for supporting their daughters PrEP use included: creating a supportive environment for PrEP use (e.g., ensuring good diet) while male parents described offering logistical and material support (e.g., providing transport to health centres).</li> </ul> |
| n/a<br><b>Modelling</b> | Cremin et al. (2015) <sup>57</sup><br><br>Mozambique | <p>Research article</p> <p>The aim of this paper is to estimate the prevention impact and the cost effectiveness of providing time-limited PrEP to partners of migrant miners in Gaza, Mozambique.</p> | <p><b>Study population:</b><br/>Never been offered to use PrEP services (hypothetical opinions related to PrEP)</p> <p><b>Sample</b><br/><b>Population:</b><br/>adult heterosexual</p> <p><b>Sample size (total – N):</b><br/>Note mentioned (modelling)</p> <p><b>Gender distribution:</b><br/>N/A</p> <p><b>Age distribution:</b><br/>N/A</p> | <p><b>Nature of Intervention:</b><br/>n/a</p> <p><b>Intervention components:</b><br/>n/a</p> <p><b>Intervention delivery setting:</b><br/>n/a</p> | <ul style="list-style-type: none"> <li>• Providing time-limited PrEP to partners of migrant miners in Gaza Province during periods of increased exposure would be a novel strategy for providing PrEP. This strategy would allow for a better prioritized intervention, with the potential to improve the efficiency of a PrEP intervention considerably, as well as providing important reproductive health benefits</li> </ul>                                                                                                                                                                                 |
| n/a<br><b>Modelling</b> | Irungu et al. (2019) <sup>58</sup><br><br>Kenya      | <p>Research article</p> <p>To provide estimates of the cost of delivering antiretroviral-based HIV prevention to HIV serodiscordant couples in</p>                                                     | <p><b>Study population:</b><br/>Never been offered to use PrEP services (hypothetical opinions related to PrEP)</p> <p><b>Sample</b><br/><b>Population:</b><br/>Heterosexual couples</p> <p><b>Sample size (total – N):</b> N/A</p>                                                                                                             | <p><b>Nature of Intervention:</b><br/>n/a</p> <p><b>Intervention components:</b><br/>n/a</p>                                                      | <ul style="list-style-type: none"> <li>• Time-limited provision of PrEP to the HIV uninfected partner within HIV serodiscordant couples can be an affordable delivery model implemented in HIV care programs in Kenya and similar settings. These</li> </ul>                                                                                                                                                                                                                                                                                                                                                     |

|                               |                                                           |                                                                                                                                              |                                                                                                                                                                                                                                                                          |                                                                                                                                                                                                 |                                                                                                                                                                                                                                                                                                                                                                                                                                                                                                            |
|-------------------------------|-----------------------------------------------------------|----------------------------------------------------------------------------------------------------------------------------------------------|--------------------------------------------------------------------------------------------------------------------------------------------------------------------------------------------------------------------------------------------------------------------------|-------------------------------------------------------------------------------------------------------------------------------------------------------------------------------------------------|------------------------------------------------------------------------------------------------------------------------------------------------------------------------------------------------------------------------------------------------------------------------------------------------------------------------------------------------------------------------------------------------------------------------------------------------------------------------------------------------------------|
|                               |                                                           | public health facilities in Kenya and the incremental cost of providing PrEP as a component of this strategy.                                | <p><b>Gender distribution:</b><br/>none provided</p> <p><b>Age distribution:</b><br/>No age disaggregation</p>                                                                                                                                                           |                                                                                                                                                                                                 | costs can be used for budgetary planning and cost effectiveness analyses.                                                                                                                                                                                                                                                                                                                                                                                                                                  |
| n/a<br>Modelling <sup>e</sup> | Ngure et al. (2020) <sup>34</sup><br><br>Kenya and Uganda | Research article<br><br>To estimate the associations between effective contraceptive use and 1) PrEP dispensation 2) high effective PrEP use | <p><b>Study population:</b><br/>Offered to use PrEP services</p> <p><b>Sample Population:</b><br/><b>Sample size (total – N):</b> 311</p> <p><b>Gender distribution:</b><br/>Female: 100%</p> <p><b>Age distribution:</b><br/>Median age: 29 years ([IQR] 24.0-35.0)</p> | <p><b>Nature of Intervention:</b><br/>HIV-uninfected women were provided with both PrEP and effective contraception</p> <p><b>Intervention components:</b><br/>PrEP was integrated with ART</p> | <ul style="list-style-type: none"> <li>• PrEP dispensation was more frequent among those concurrently using effective contraception, (adjusted relative risk [aRR]=1.19; 95% confidence interval [CI]=1.08-1.32) and contraceptive use was more common among those on PrEP (aRR=1.63; 95% CI=1.18-2.25).</li> <li>• Healthcare delivery models that integrate the provision of family planning and PrEP may successfully promote both preventive products, especially long-acting contraception</li> </ul> |

a. Conducted in the context of the Girl Power study b. Conducted in the context of the PrEP Implementation in Young Women and Adolescents (PriYA) study c. Conducted in the context of the Prevention Option for Women Evaluation Research (POWER) project d. Conducted in the context of the Sustainable East Africa Research in Community Health (SEARCH) study e. Implemented within The Partners Demonstration Project



| Author                                                                                                                                                                                            | Item |   |   |   |   |     |   |   |   |    | 11 |
|---------------------------------------------------------------------------------------------------------------------------------------------------------------------------------------------------|------|---|---|---|---|-----|---|---|---|----|----|
|                                                                                                                                                                                                   | 1    | 2 | 3 | 4 | 5 | 6   | 7 | 8 | 9 | 10 |    |
| <b>Qualitative studies using the CASP Tool <sup>22</sup></b>                                                                                                                                      |      |   |   |   |   |     |   |   |   |    |    |
| Atujuna et al., 2018 <sup>51</sup>                                                                                                                                                                | +    | + | + | + | + | +   | + | + | + | +  |    |
| Bassett et al., 2019 <sup>46</sup>                                                                                                                                                                | +    | + | + | ? | + | ?   | + | + | + | +  |    |
| Bell et al., 2019 <sup>36*</sup>                                                                                                                                                                  | +    | + | + | ? | ? | -   | - | ? | - | ?  |    |
| Camlin et al., 2020 <sup>42</sup>                                                                                                                                                                 | +    | + | + | + | + | +   | + | + | + | +  |    |
| Gombe et al., 2020 <sup>44</sup>                                                                                                                                                                  | +    | + | ? | ? | + | +   | + | + | + | +  |    |
| Jani et al., <sup>55</sup>                                                                                                                                                                        | +    | + | + | ? | ? | -   | ? | ? | + | ?  |    |
| Makyao et al., <sup>56</sup>                                                                                                                                                                      | +    | + | + | ? | ? | -   | - | ? | ? | ?  |    |
| Maseko et al., <sup>25</sup>                                                                                                                                                                      | +    | ? | - | - | + | ?   | - | + | ? | ?  |    |
| Ngure et al., 2016 <sup>38</sup>                                                                                                                                                                  | +    | + | + | + | + | +   | + | + | + | +  |    |
| Pintye et al., 2019 <sup>29</sup>                                                                                                                                                                 | +    | + | + | ? | + | ?   | ? | ? | + | +  |    |
| Ware et al., 2018 <sup>50</sup>                                                                                                                                                                   | +    | + | + | + | + | ?   | + | ? | ? | ?  |    |
| Morton et al., 2020 <sup>48*</sup>                                                                                                                                                                | +    | + | + | + | + | -   | + | ? | + | +  |    |
| Were et al., 2020 <sup>35*</sup>                                                                                                                                                                  | +    | + | + | + | + | +   | + | + | + | +  |    |
| Sack et al., 2021 <sup>51</sup>                                                                                                                                                                   | +    | + | + | + | + | +   | + | + | + | +  |    |
| <b>Comparative studies including randomised trials, nonrandomised trials, interrupted time series and controlled-before after studies using the EPOC tool <sup>21</sup></b>                       |      |   |   |   |   |     |   |   |   |    |    |
| Delany-Moretlwe et al., 2018 <sup>34</sup>                                                                                                                                                        | ?    | ? | + | ? | ? | ?   | ? | ? | ? |    |    |
| Koss et al., 2018 <sup>39</sup>                                                                                                                                                                   | -    | ? | + | + | ? | +   | + | + | + |    |    |
| Donnell et al., 2021 <sup>34</sup>                                                                                                                                                                | ?    | ? | + | + | ? | ?   | ? | + | + |    |    |
| <b>Studies involving descriptions of interventions, implementation or policy processes with very limited empirical data and other non-conventional sources using the WEIRD tool <sup>23</sup></b> |      |   |   |   |   |     |   |   |   |    |    |
| Baetan et al., 2016 <sup>52</sup>                                                                                                                                                                 | +    | + | + | ! | + | N/A | ! | + | + | +  | +  |
| Bassett et al., 2018 <sup>45</sup>                                                                                                                                                                | +    | + | ? | + | + | +   | ? | + | + | +  | +  |
| Bell et al., 2019 <sup>36*</sup>                                                                                                                                                                  | !    | - | - | ? | ? | ?   | ? | - | ? | -  | -  |
| Heffron et al., 2018 <sup>49</sup>                                                                                                                                                                | +    | ? | ! | ? | ? | +   | ? | + | + | +  | +  |
| Heffron et al., 2018 <sup>37</sup>                                                                                                                                                                | +    | ! | ! | ! | - | !   | ? | ? | ? | +  | +  |

|                                    |   |   |   |   |     |     |   |   |   |   |   |
|------------------------------------|---|---|---|---|-----|-----|---|---|---|---|---|
| Kinuthia et al.,2020 <sup>28</sup> | + | + | + | ! | ?   | N/A | ! | ! | ! | + | + |
| Koss et al., 2020 <sup>40</sup>    | ? | ? | ? | ? | ?   | ?   | ? | ? | ? | ? | ? |
| Koss et al.,2017 <sup>43</sup>     | - | - | - | - | -   | +   | ? | ? | + | ? | - |
| Lubwama et al., 2019 <sup>47</sup> | - | + | - | ? | N/A | !   | - | - | ? | + | - |
| Mayer et al.,2019 <sup>41</sup>    | + | + | + | + | +   | N/A | ! | + | + | + | + |
| Mugwanya et al.,2019 <sup>26</sup> | + | + | ? | ? | !   | !   | ! | ! | ! | + | ! |
| Ongwen et al.,2019 <sup>32</sup>   | ! | ! | ? | ! | +   | N/A | ! | - | ! | ? | - |
| Pintye et al.,2018 <sup>27</sup>   | + | ! | ! | ! | ?   | ?   | ? | ! | ! | ? | ? |
| Rousseau et al.,2019 <sup>33</sup> | ? | ? | ? | ? | ?   | ?   | ? | ? | ? | ? | ? |
| Travill et al.,2018 <sup>31</sup>  | ! | ? | ? | ! | ?   | ?   | ? | - | - | - | - |
| Hill et al.,2020 <sup>30</sup>     | + | + | + | + | +   | +   | + | + | + | + | + |
| Morton et al.,2020 <sup>48*</sup>  | + | + | + | + | +   | +   | + | + | + | ! | + |
| Minnis et al.,2020 <sup>54</sup>   | + | + | + | + | +   | +   | + | + | + | + | + |
| Were et al.,2020 <sup>35*</sup>    | + | + | + | + | +   | +   | + | + | + | + | + |

+=Yes/Low risk/No or very minor concerns; -=No/High risk/Serious concerns'; ?=Can't tell/Unclear risk/Moderate concerns; !=Minor concerns

\*Mixed methods study, Modelling studies were not appraised

## Preferred Reporting Items for Systematic reviews and Meta-Analyses extension for Scoping Reviews (PRISMA-ScR) Checklist

| SECTION                                               | ITEM | PRISMA-ScR CHECKLIST ITEM                                                                                                                                                                                                                                                                                  | REPORTED ON PAGE # |
|-------------------------------------------------------|------|------------------------------------------------------------------------------------------------------------------------------------------------------------------------------------------------------------------------------------------------------------------------------------------------------------|--------------------|
| <b>TITLE</b>                                          |      |                                                                                                                                                                                                                                                                                                            |                    |
| Title                                                 | 1    | Identify the report as a scoping review.                                                                                                                                                                                                                                                                   | 1                  |
| <b>ABSTRACT</b>                                       |      |                                                                                                                                                                                                                                                                                                            |                    |
| Structured summary                                    | 2    | Provide a structured summary that includes (as applicable): background, objectives, eligibility criteria, sources of evidence, charting methods, results, and conclusions that relate to the review questions and objectives.                                                                              | 2                  |
| <b>INTRODUCTION</b>                                   |      |                                                                                                                                                                                                                                                                                                            |                    |
| Rationale                                             | 3    | Describe the rationale for the review in the context of what is already known. Explain why the review questions/objectives lend themselves to a scoping review approach.                                                                                                                                   | 3-5                |
| Objectives                                            | 4    | Provide an explicit statement of the questions and objectives being addressed with reference to their key elements (e.g., population or participants, concepts, and context) or other relevant key elements used to conceptualize the review questions and/or objectives.                                  | 5                  |
| <b>METHODS</b>                                        |      |                                                                                                                                                                                                                                                                                                            |                    |
| Protocol and registration                             | 5    | Indicate whether a review protocol exists; state if and where it can be accessed (e.g., a Web address); and if available, provide registration information, including the registration number.                                                                                                             | 6                  |
| Eligibility criteria                                  | 6    | Specify characteristics of the sources of evidence used as eligibility criteria (e.g., years considered, language, and publication status), and provide a rationale.                                                                                                                                       | 6-7                |
| Information sources*                                  | 7    | Describe all information sources in the search (e.g., databases with dates of coverage and contact with authors to identify additional sources), as well as the date the most recent search was executed.                                                                                                  | 7                  |
| Search                                                | 8    | Present the full electronic search strategy for at least 1 database, including any limits used, such that it could be repeated.                                                                                                                                                                            | 7                  |
| Selection of sources of evidence†                     | 9    | State the process for selecting sources of evidence (i.e., screening and eligibility) included in the scoping review.                                                                                                                                                                                      | 7                  |
| Data charting process‡                                | 10   | Describe the methods of charting data from the included sources of evidence (e.g., calibrated forms or forms that have been tested by the team before their use, and whether data charting was done independently or in duplicate) and any processes for obtaining and confirming data from investigators. | 7                  |
| Data items                                            | 11   | List and define all variables for which data were sought and any assumptions and simplifications made.                                                                                                                                                                                                     | 7                  |
| Critical appraisal of individual sources of evidence§ | 12   | If done, provide a rationale for conducting a critical appraisal of included sources of evidence; describe the methods used and how this information was used in any data synthesis (if appropriate).                                                                                                      | 7                  |



| SECTION                                       | ITEM | PRISMA-ScR CHECKLIST ITEM                                                                                                                                                                       | REPORTED ON PAGE # |
|-----------------------------------------------|------|-------------------------------------------------------------------------------------------------------------------------------------------------------------------------------------------------|--------------------|
| Synthesis of results                          | 13   | Describe the methods of handling and summarizing the data that were charted.                                                                                                                    | 8                  |
| <b>RESULTS</b>                                |      |                                                                                                                                                                                                 |                    |
| Selection of sources of evidence              | 14   | Give numbers of sources of evidence screened, assessed for eligibility, and included in the review, with reasons for exclusions at each stage, ideally using a flow diagram.                    | 8-9                |
| Characteristics of sources of evidence        | 15   | For each source of evidence, present characteristics for which data were charted and provide the citations.                                                                                     | 9-28               |
| Critical appraisal within sources of evidence | 16   | If done, present data on critical appraisal of included sources of evidence (see item 12).                                                                                                      | 29                 |
| Results of individual sources of evidence     | 17   | For each included source of evidence, present the relevant data that were charted that relate to the review questions and objectives.                                                           | 29-33              |
| Synthesis of results                          | 18   | Summarize and/or present the charting results as they relate to the review questions and objectives.                                                                                            | 29-33              |
| <b>DISCUSSION</b>                             |      |                                                                                                                                                                                                 |                    |
| Summary of evidence                           | 19   | Summarize the main results (including an overview of concepts, themes, and types of evidence available), link to the review questions and objectives, and consider the relevance to key groups. | 33-36              |
| Limitations                                   | 20   | Discuss the limitations of the scoping review process.                                                                                                                                          | 36                 |
| Conclusions                                   | 21   | Provide a general interpretation of the results with respect to the review questions and objectives, as well as potential implications and/or next steps.                                       | 36                 |
| <b>FUNDING</b>                                |      |                                                                                                                                                                                                 |                    |
| Funding                                       | 22   | Describe sources of funding for the included sources of evidence, as well as sources of funding for the scoping review. Describe the role of the funders of the scoping review.                 | 37                 |

JBI = Joanna Briggs Institute; PRISMA-ScR = Preferred Reporting Items for Systematic reviews and Meta-Analyses extension for Scoping Reviews.

\* Where *sources of evidence* (see second footnote) are compiled from, such as bibliographic databases, social media platforms, and Web sites.

† A more inclusive/heterogeneous term used to account for the different types of evidence or data sources (e.g., quantitative and/or qualitative research, expert opinion, and policy documents) that may be eligible in a scoping review as opposed to only studies. This is not to be confused with *information sources* (see first footnote).

‡ The frameworks by Arksey and O'Malley (6) and Levac and colleagues (7) and the JBI guidance (4, 5) refer to the process of data extraction in a scoping review as data charting.

§ The process of systematically examining research evidence to assess its validity, results, and relevance before using it to inform a decision. This term is used for items 12 and 19 instead of "risk of bias" (which is more applicable to systematic reviews of interventions) to include and acknowledge the various sources of evidence that may be used in a scoping review (e.g., quantitative and/or qualitative research, expert opinion, and policy document).

From: Tricco AC, Lillie E, Zarin W, O'Brien KK, Colquhoun H, Levac D, et al. PRISMA Extension for Scoping Reviews (PRISMA-ScR): Checklist and Explanation. *Ann Intern Med.* 2018;169:467–473. doi: 10.7326/M18-0850.



St. Michael's

Inspired Care.  
Inspiring Science.

For peer review only - <http://bmjopen.bmj.com/site/about/guidelines.xhtml>

# BMJ Open

## Service delivery models that promote linkages to PrEP for adolescent girls and young women and men in sub-Saharan Africa: A scoping review

|                                 |                                                                                                                                                                                                                                                                                                                                                                                                                                                                                                                                                                                                                                                                                                                                                                                                                                                                                                                                                                                                                                                                                                                                                                                                                                                                                                                                                                                                                                                                                                                                                                                                                             |
|---------------------------------|-----------------------------------------------------------------------------------------------------------------------------------------------------------------------------------------------------------------------------------------------------------------------------------------------------------------------------------------------------------------------------------------------------------------------------------------------------------------------------------------------------------------------------------------------------------------------------------------------------------------------------------------------------------------------------------------------------------------------------------------------------------------------------------------------------------------------------------------------------------------------------------------------------------------------------------------------------------------------------------------------------------------------------------------------------------------------------------------------------------------------------------------------------------------------------------------------------------------------------------------------------------------------------------------------------------------------------------------------------------------------------------------------------------------------------------------------------------------------------------------------------------------------------------------------------------------------------------------------------------------------------|
| Journal:                        | <i>BMJ Open</i>                                                                                                                                                                                                                                                                                                                                                                                                                                                                                                                                                                                                                                                                                                                                                                                                                                                                                                                                                                                                                                                                                                                                                                                                                                                                                                                                                                                                                                                                                                                                                                                                             |
| Manuscript ID                   | bmjopen-2022-061503.R3                                                                                                                                                                                                                                                                                                                                                                                                                                                                                                                                                                                                                                                                                                                                                                                                                                                                                                                                                                                                                                                                                                                                                                                                                                                                                                                                                                                                                                                                                                                                                                                                      |
| Article Type:                   | Original research                                                                                                                                                                                                                                                                                                                                                                                                                                                                                                                                                                                                                                                                                                                                                                                                                                                                                                                                                                                                                                                                                                                                                                                                                                                                                                                                                                                                                                                                                                                                                                                                           |
| Date Submitted by the Author:   | 14-Feb-2023                                                                                                                                                                                                                                                                                                                                                                                                                                                                                                                                                                                                                                                                                                                                                                                                                                                                                                                                                                                                                                                                                                                                                                                                                                                                                                                                                                                                                                                                                                                                                                                                                 |
| Complete List of Authors:       | Ramraj, Trisha; South African Medical Research Council Durban, HIV and other Infectious Diseases Research Unit<br>Chirinda, Witness; South African Medical Research Council, Health Systems Research Unit<br>Jonas, Kim; South African Medical Research Council, Health Systems Research; University of Cape Town, Adolescent Health Research Unit<br>Govindasamy, D.; South African Medical Research Council, Health Systems Research Unit; University of Cape Town, Adolescent Health Research Unit<br>Jama, N.; South African Medical Research Council, Burden of Disease Research Unit<br>McClinton Appollis, Tracy; South African Medical Research Council, Health Systems Research Unit; University of Cape Town, Adolescent Health Research Unit<br>Zani, Babalwa; South African Medical Research Council, Burden of Disease Research Unit<br>Mukumbang, Ferdinand; South African Medical Research Council, Burden of Disease Research Unit<br>Basera, W.; South African Medical Research Council, Burden of Disease Research Unit<br>Hlongwa, Mbuzeleni ; South African Medical Research Council, Burden of Disease Research Unit<br>Turawa, Eunice; South African Medical Research Council, Burden of Disease Research Unit; Stellenbosch University Faculty of Medicine and Health Sciences<br>Mathews, C.; South African Medical Research Council, Health Systems Research Unit; University of Cape Town, Adolescent Health Research Unit<br>Nicol, Edward; South African Medical Research Council, Burden of Disease Research Unit, Tygerberg; Stellenbosch University, Faculty of Medicine and Health Sciences |
| <b>Primary Subject Heading</b>: | HIV/AIDS                                                                                                                                                                                                                                                                                                                                                                                                                                                                                                                                                                                                                                                                                                                                                                                                                                                                                                                                                                                                                                                                                                                                                                                                                                                                                                                                                                                                                                                                                                                                                                                                                    |
| Secondary Subject Heading:      | Public health                                                                                                                                                                                                                                                                                                                                                                                                                                                                                                                                                                                                                                                                                                                                                                                                                                                                                                                                                                                                                                                                                                                                                                                                                                                                                                                                                                                                                                                                                                                                                                                                               |
| Keywords:                       | PUBLIC HEALTH, HIV & AIDS < INFECTIOUS DISEASES, Public health < INFECTIOUS DISEASES                                                                                                                                                                                                                                                                                                                                                                                                                                                                                                                                                                                                                                                                                                                                                                                                                                                                                                                                                                                                                                                                                                                                                                                                                                                                                                                                                                                                                                                                                                                                        |

1  
2  
3  
4  
5  
6  
7  
8  
9  
10  
11  
12  
13  
14  
15  
16  
17  
18  
19  
20  
21  
22  
23  
24  
25  
26  
27  
28  
29  
30  
31  
32  
33  
34  
35  
36  
37  
38  
39  
40  
41  
42  
43  
44  
45  
46  
47  
48  
49  
50  
51  
52  
53  
54  
55  
56  
57  
58  
59  
60



SCHOLARONE™  
Manuscripts



I, the Submitting Author has the right to grant and does grant on behalf of all authors of the Work (as defined in the below author licence), an exclusive licence and/or a non-exclusive licence for contributions from authors who are: i) UK Crown employees; ii) where BMJ has agreed a CC-BY licence shall apply, and/or iii) in accordance with the terms applicable for US Federal Government officers or employees acting as part of their official duties; on a worldwide, perpetual, irrevocable, royalty-free basis to BMJ Publishing Group Ltd ("BMJ") its licensees and where the relevant Journal is co-owned by BMJ to the co-owners of the Journal, to publish the Work in this journal and any other BMJ products and to exploit all rights, as set out in our [licence](#).

The Submitting Author accepts and understands that any supply made under these terms is made by BMJ to the Submitting Author unless you are acting as an employee on behalf of your employer or a postgraduate student of an affiliated institution which is paying any applicable article publishing charge ("APC") for Open Access articles. Where the Submitting Author wishes to make the Work available on an Open Access basis (and intends to pay the relevant APC), the terms of reuse of such Open Access shall be governed by a Creative Commons licence – details of these licences and which [Creative Commons](#) licence will apply to this Work are set out in our licence referred to above.

Other than as permitted in any relevant BMJ Author's Self Archiving Policies, I confirm this Work has not been accepted for publication elsewhere, is not being considered for publication elsewhere and does not duplicate material already published. I confirm all authors consent to publication of this Work and authorise the granting of this licence.

**Title**

Service delivery models that promote linkages to PrEP for adolescent girls and young women and men in sub-Saharan Africa: A scoping review

**Authors**

\*Trisha Ramraj<sup>1a</sup>; Witness Chirinda<sup>2a</sup>; Kim Jonas<sup>2,3</sup>; Darshini Govindasamy<sup>2,3</sup>; Ngcwalisa Jama<sup>4</sup>; Tracy McClinton Appollis<sup>2,3</sup>; Babalwa Zani<sup>4</sup>; Ferdinand Mukumbang<sup>4</sup>; Wisdom Basera<sup>4</sup>; Mbuzeleni Hlongwa<sup>4,5</sup>; Eunice Turawa<sup>4,6</sup>; Catherine Mathews<sup>2,3</sup>; Edward Nicol<sup>4,6</sup>

**Author Affiliations**

<sup>1</sup> HIV and other Infectious Diseases Research Unit, South Africa Medical Research Council, Cape Town, South Africa

<sup>2</sup> Health Systems Research Unit, South Africa Medical Research Council, Cape Town, South Africa

<sup>3</sup> Adolescent Health Research Unit, Division of Child and Adolescent Psychiatry, Faculty of Health Sciences, University of Cape Town, Cape Town, South Africa

<sup>4</sup> Burden of Disease Research Unit, South African Medical Research Council, Cape Town, South Africa

<sup>5</sup> School of Nursing and Public Health, University of KwaZulu-Natal, Durban, South Africa.

<sup>6</sup> Health Systems and Public Health Division, Faculty of Medicine and Health Sciences, Stellenbosch University, Cape Town, South Africa

**\*Corresponding author:** Trisha Ramraj, HIV Prevention Research Unit, South African Medical Research Council, 491 Peter Mokaba Road, Durban, 4093, South Africa.

*E-mail address:* [trisha.ramraj@mrc.ac.za](mailto:trisha.ramraj@mrc.ac.za)

<sup>a</sup> These authors contributed equally to the work.



## Abstract

**Background:** Pre-exposure prophylaxis (PrEP) is an emerging biomedical prevention intervention. Documenting PrEP service delivery models (SDMs) that promote linkage to and continuation of PrEP will inform guidelines and maximise roll out.

**Objectives:** To synthesize and appraise the effectiveness and feasibility of PrEP SDMs designed to promote linkage to PrEP care among adolescent girls and young women (AGYW) and men in sub-Saharan Africa (SSA).

**Eligibility criteria:** Primary quantitative and qualitative studies published in English and conducted in SSA were included. No restrictions on the date of publication were applied.

**Sources of evidence:** Methodology outlined in the Joanna Briggs Institute reviewers' manual was followed. PubMed, Cochrane library, Scopus, Web of Science, and online-conference abstract archives were searched.

**Charting methods:** Data on article, population, intervention characteristics and key outcomes was charted in REDCap.

**Results and Conclusion:** Of the 1204 identified records, 37 (met the inclusion criteria. Health facility-based integrated models of PrEP delivery with family planning, maternal and child health or sexual and reproductive services to AGYW resulted in PrEP initiation of 16-90%. Community-based drop-in centres (66%) was the preferred PrEP outlet for AGYW compared to public clinics (25%) and private clinics (9%). Most men preferred community-based delivery models. Among individuals who initiated PrEP, 50% were men, 62% were <35 years old and 97% were tested at health fairs compared to home testing. Integrated antiretroviral therapy (ART)-PrEP delivery was favoured among serodiscordant couples with 82.9% of couples using PrEP or ART with no HIV seroconversions. PrEP initiation within healthcare facilities was increased by perceived client-friendly services and non-judgmental healthcare workers. Barriers to PrEP initiation included distance to travel to and time spent at health facilities and perceived community stigma. PrEP SDMs for AGYW and men need to be tailored to the needs and preferences for each group. Programme implementers should promote community-based SDMs to increase PrEP initiation among AGYW and men.

**Key words:** Pre-exposure prophylaxis, PrEP, linkage, adolescent girls, and young women, AGYW, men, sub-Saharan Africa

### Strengths and limitations of this study

- A comprehensive search strategy was developed, and the search was carried out across multiple databases and conference archives.
- The methodology used in the scoping review was robust and included double data screening, extraction, and synthesis.
- All included studies underwent critical appraisal of sources of evidence using approved tools.
- Studies not conducted in SSA and that were published in non-English languages were excluded.
- Most of the included studies were from Kenya, Uganda, and South Africa limiting the generalizability of the results.

### Background

Recent reports indicate a decline in new HIV infections globally. However, this decline is occurring at a slower pace in regions with generalized HIV epidemics such as sub-Saharan Africa (SSA). In 2017, SSA accounted for 64% of new HIV infections globally.<sup>1</sup> Two underserved populations that are critical to drive the decline in new HIV infections are adolescent girls and young women (AGYW; 15-24 years) and men (25-65 years). AGYW are at substantial risk for HIV-infection with an estimated 310 000 new infections globally in 2018 – 86% of which was in SSA.<sup>1</sup> Men, on the other hand, account for more AIDS-related deaths globally than women – 400 000 deaths in men in 2018 compared to 270 000 in woman.<sup>1</sup>

For differing reasons, AGYW and men show lower health seeking behaviour because of interpersonal and structural factors. AGYW's access to health services is limited by stigma, negative attitudes from healthcare workers and inconvenient clinic operating hours.<sup>2</sup> However, 'man unfriendly clinics' are characterised by inaccessible clinic hours/locations, difficulty in engaging with female staff, and gender norms that discourage men from accessing health services.<sup>3 4</sup>

Amongst the 2020 Global Prevention Targets and Commitments is the reduction in the number of AGYW newly infected with HIV globally to below 100 000, and to ensure that 3 million people at substantial risk of contracting HIV have access to pre-exposure prophylaxis (PrEP).<sup>5</sup> To achieve these targets, primary prevention programmes should be structured around five central pillars: (1) combination prevention for AGYW; (2) combination prevention with key populations; (3) voluntary medical male circumcision (VMMC) and sexual and reproductive health services (SRHS) for men and boys; (4) comprehensive condom

1  
2  
3 programmes; and (5) rapid introduction of PrEP.<sup>5</sup> PrEP for HIV refers to the use of  
4 antiretroviral drugs among HIV-negative people to prevent the acquisition of HIV.<sup>6</sup>  
5  
6

7 PrEP has shown effectiveness in reducing HIV acquisition among couples, sex workers, men  
8 who have sex with men (MSM), transgender and people who inject drugs and AGYW.<sup>7</sup> The  
9 impact of PrEP on the HIV epidemic depends on the extent of PrEP initiation among people  
10 at substantial risk for HIV infection (World Health Organization (WHO) defined substantial risk  
11 of HIV acquisition as HIV incidence of 3 per 100 person-years or higher in the absence of  
12 PrEP).<sup>7,8</sup> Since September 2015, the WHO recommended offering oral PrEP to every person  
13 at substantial risk of contracting HIV.<sup>7</sup> In the current South African guidelines for PrEP, specific  
14 populations considered to be at substantial risk of HIV infection include AGYW, MSM, people  
15 with more than one sexual partner, people who inject drugs, people with a recent history of  
16 sexually transmitted infections, people who recognise their own risk and request PrEP,  
17 serodiscordant couples if the HIV positive partner is not virally suppressed, and sex  
18 workers.<sup>9,10</sup>  
19  
20  
21  
22  
23  
24  
25

26 Literature on PrEP has largely been focused on knowledge, attitudes, and interest in PrEP. As  
27 countries scale up use of PrEP as part of their combination prevention packages, evidence on  
28 service delivery models (SDMs) that promote initiation and continuation on PrEP are needed  
29 especially among vulnerable and hard to reach populations such as AGYW and men. HIV  
30 prevention cascades have been proposed as a logical framework to monitor populations at  
31 substantial risk for HIV acquisition as they navigate the steps from HIV testing to assessing the  
32 risk of the individual to determining PrEP eligibility before PrEP initiation and continuation or  
33 discontinuation.<sup>8</sup> PrEP initiation (step 5) represents a critical step in the PrEP cascade (Figure  
34 1),<sup>8,10</sup> because it reflects people's awareness and interest in lowering their risk for HIV.  
35 Differentiated models, which are centred around clients' needs and expectations and  
36 relieving unnecessary burdens on the health system while targeting behavioural and  
37 structural determinants of AGYW and men, can potentially increase acceptability and  
38 accessibility of PrEP. These include innovative strategies that streamline HIV testing, link  
39 AGYW and men to HIV prevention services, provide differentiating medication access points,  
40 reduce stigma and barriers of parental consent for PrEP initiation.<sup>11</sup> PrEP SDMs should be  
41 designed with the populations being served central to the design.<sup>12</sup>  
42  
43  
44  
45  
46  
47  
48  
49  
50  
51  
52  
53  
54  
55  
56  
57  
58  
59  
60

[Insert Figure 1 here]

**Figure 1: Oral PrEP cascade: Adapted from Dunbar et al (2018)<sup>8</sup>**

Following an HIV-negative diagnosis (step 1), an individual is assessed for risk of HIV (step 2). An individual at substantial risk of HIV acquisition or who requests pre-exposure prophylaxis (PrEP) is assessed for eligibility for PrEP (step 3). After documenting eligibility for PrEP use, several baseline clinical investigations are conducted (step 4 PrEP is initiated (step 5) on the same-day as HIV testing. The recommended regimen is Tenofovir (TDF) / emtricitabine (FTC) 1 tablet by mouth daily. PrEP continuation visits (step 6) include: month 1, every 3 months. PrEP is discontinued (step 7) if the individual tests HIV positive, develops renal disease, is non-adherent, does not want or need PrEP, no longer meets eligibility criteria, or if there are safety concerns.

There is a gap in knowledge on the characteristics of AGYW and men who initiate PrEP compared to those who do not initiate PrEP. This information is critical for informing national policies and implementation guidelines for PrEP roll-out. As such, the aim of this review was to synthesize and appraise the effectiveness and feasibility of PrEP SDMs designed to promote linkage to care among AGYW and men eligible for PrEP in SSA. The objectives were to a) summarize SDMs that promote PrEP initiation and b) explore users' perceptions, and barriers and facilitators of these PrEP models.

## Methods

We used a scoping review design to map existing literature, explore the research studies conducted and identify research and knowledge gaps in models used to deliver PrEP.<sup>13</sup> Scoping reviews can be of particular use when the topic has not yet been extensively reviewed or is of a complex or heterogeneous nature.<sup>14</sup> The research question was defined using the Population- Intervention-Comparison-Outcome (PICO) framework (Table 1). We defined our outcomes as i) Linkage to PrEP care (defined as the proportion of AGYW or men who are initiated on PrEP following an HIV-negative diagnosis, step 7 of Figure 1) and ii) perceptions, barriers, and facilitators of PrEP SDMs. The service delivery model was defined as the setting used for delivery of PrEP viz. facility-only, community-only, research-only, mobile-only and a hybrid model encompassing two or more of the above settings.

**Table 1: Scoping review population, intervention, and outcome**

|              |                                                                                                                                                      |
|--------------|------------------------------------------------------------------------------------------------------------------------------------------------------|
| Population   | Heterosexual females (15-24 years) and men (25-65 years)                                                                                             |
| Intervention | Interventions (SDMs) designed to improve PrEP initiation                                                                                             |
| Comparison   | Not applicable                                                                                                                                       |
| Outcome      | Linkage to PrEP care (defined as the proportion of AGYW or men who are initiated on PrEP following a HIV-negative diagnosis) and perceptions on SDMs |

### Protocol and registration

This review was conducted and reported in line with the Joanna Briggs Institute (JBI) reviewer's manual and structured using the Preferred Reporting Items for Systematic Reviews and Meta-Analyses extension for scoping reviews (PRISMA-ScR).<sup>15 16</sup> A review protocol for this scoping review was registered with the Open Science Framework (DOI 10.17605/[OSF.IO/EG9TD](https://doi.org/10.17605/OSF.IO/EG9TD)).

### Research ethics approval

The scoping review focuses on published research in the public domain therefore no ethics approval is required.

### Patient and public involvement

No patients or public were involved in the study.

### Eligibility criteria

We included primary studies on PrEP service delivery models for AGYW and men, with both qualitative and quantitative study designs published in English and conducted in SSA. No restrictions on the date of publication were applied (last literature search was conducted in July 2021). Table 2 details the inclusion criteria applied to studies. We excluded studies that were focused exclusively on key population groups in HIV programmes such as lesbian, gay, bisexual, MSM etc. and publication types (e.g., systematic reviews, case studies, etc).

**Table 2:** Eligibility criteria describing study inclusion criteria for the scoping review

|            |                                                                                                                                                                                                                                                                                  |
|------------|----------------------------------------------------------------------------------------------------------------------------------------------------------------------------------------------------------------------------------------------------------------------------------|
| Study type | Quantitative studies including randomized clinical trials (RCT), quasi-randomized, and non-RCTs, longitudinal observational (historical cohorts, prospective cohorts, case-control, and before-and-after studies), analytic cross-sectional studies, and non-comparative studies |
|            | Qualitative studies using any study design                                                                                                                                                                                                                                       |
| Population | Study population included heterosexual females (15-24 years) and males (25-65 years)                                                                                                                                                                                             |
| Outcomes   | Focus of research: PrEP SDMs i.e., service provision / implementation science / models of care / differentiated care / linkage to care / intervention                                                                                                                            |
|            | Papers reporting on barriers and facilitators of PrEP SDMs                                                                                                                                                                                                                       |
|            | Papers on user perceptions of PrEP SDMs                                                                                                                                                                                                                                          |
| Setting    | Sub-Saharan African countries – based on the World Bank's country classification <sup>17</sup>                                                                                                                                                                                   |

### Information sources and search strategy

PubMed, Cochrane library, Scopus, and Web of Science including three online conference archives (AIDS conference, Conference on Retroviruses and Opportunistic Infections and International AIDS Society Conference on HIV Science) were searched. The reference list of systematic reviews was checked to identify relevant primary studies. The three-step search strategy recommended by the JBI Reviewer's Manual was used.<sup>15</sup> During the first step, one author (WC) conducted an elementary search on PubMed to establish the volume of relevant articles on the topic. Two authors (WC and TR) then screened the title and abstract of the retrieved articles to identify keywords and index terms which were used to build a search strategy (see online supplementary appendix 1). The final search results were exported into EndNote,<sup>18</sup> and duplicates were removed.

### Selection of sources of evidence

Titles and abstracts were double screened in Rayyan<sup>19</sup> by any two of a group of eight independent authors (TR, WC, KJ, NJ, DG, TMA, MH, ET). There was no restriction placed on age range during the screening phase to ensure that articles with age disaggregated analysis were included. Full text articles and conference abstracts, including articles from the 2020 AIDS conference were retrieved and independently double screened by WC and TR.

### Data charting process and data items

Using a pre-designed data-charting form, key and relevant information were systematically extracted from full-text articles in REDCap<sup>20</sup> by any two of a group of ten independent authors (TR, WC, TMA, NJ, DG, BZ, CM, MH, ET, EN). We charted data on article characteristics, population characteristics, intervention characteristics, and key outcomes (Table 1).

### Critical appraisal of individual sources of evidence

Information for quality assessment was incorporated into the data charting form on REDCap.<sup>20</sup> Due to the different study designs and research methodologies adopted in the included studies, we used three different tools to appraise the articles. For comparative studies including randomised trials, non-randomised trials, interrupted time-series and controlled before-after-studies, we used the risk of bias criteria recommended by the Effective Practice and Organisation of Care (EPOC).<sup>21</sup> For qualitative studies, we used the Critical Appraisal Skills Programme (CASP) checklist.<sup>22</sup> For other studies we used the Ways of Evaluating Important and Relevant Data (WEIRD) tool.<sup>23</sup> Modelling studies were excluded from the appraisal step.

### Analysis

For quantitative studies we used a narrative analysis and tabulated data by gender and by SDM. We summarized the settings, populations, and sample for each group, along with the interventions and findings. For qualitative studies, we did a thematic analysis that resulted in

1  
2  
3 organising the data into themes, authors' interpretations, and quotes and integrated these  
4 findings to support the quantitative data. We tabulated the data by SDMs (health facility,  
5 community, research, or mobile) and by population (AGYW only, men only, or models for  
6 both). Furthermore, we determined the existing gaps in the different categories of  
7 interventions that can be strengthened to promote initiation and continuation on PrEP among  
8 AGYW and men.  
9  
10  
11

## 12 13 **Results**

### 14 **Selection of sources of evidence**

15 Our search identified 1604 citations. After duplicates (413) were removed, a total of 1204  
16 titles and abstracts were identified from searches of electronic databases and 13 from other  
17 sources including conferences. The PRISMA flow diagram (Figure 2) illustrates the screening  
18 process to identify records that meet the study inclusion criteria. Based on the screening of  
19 title and abstracts, 1102 records were excluded, with 102 full text articles and conference  
20 abstracts to be retrieved and assessed for eligibility. From the review of full text articles 67  
21 were excluded for the following reasons: editorials/commentaries/reviews/protocols,  
22 interviews with stakeholders, articles on topical PrEP, wrong outcome and focus on key  
23 populations. During data charting, two additional articles were excluded. Four additional  
24 articles were added after the initial search process, these articles were identified following  
25 the 2020 AIDS conference in July. The final number of studies that were considered eligible  
26 for this scoping review were 37 (27 studies and 10 conference abstracts).  
27  
28  
29  
30  
31  
32  
33  
34

35 **[Insert Figure 2 here]**

### 36 **Figure 2:** PRISMA flow diagram

37 Adapted from: Moher et al<sup>24</sup>

### 38 **Description of sources of evidence**

39 A description of the characteristics, setting, SDMs and intervention modalities of the included  
40 studies are provided in online supplementary appendix 2. There was a mixture of quantitative  
41 (n=23), qualitative (n=11) and mixed method studies (n=3). Most studies were  
42 demonstration/IS projects (n=10) while other methodological approaches included  
43 randomised controlled trials (RCTs) (n=5) and cross-sectional studies (n=5). Most were  
44 conducted in Kenya (n=17), with the remainder conducted in Uganda (n=10), South Africa  
45 (n=10), Tanzania (n=3), Malawi (n=2), Mozambique (n=2), and Zimbabwe (n=1). These studies  
46 reported evidence on the following PrEP SDMs; health facility (6), mobile (1), research site  
47 (8), community (6), hybrid (10), and not described/not applicable (6). Thirteen studies focused  
48 on AGYW, 19 studies focused on AGYW and men, one study focused on men only, and four  
49 were classified as other (i.e., age categories were not specified). PrEP services were offered  
50 in 25 of the 37 studies whilst PrEP perceptions/opinions were assessed in the other 12 studies.  
51  
52  
53  
54  
55  
56  
57  
58  
59  
60

### Critical appraisal of evidence

Full text articles appraised using the WEIRD tool were mostly assessed as having either no or very minor or moderate concerns for items that were unclear in the article (see online supplementary appendix 3). Most of the qualitative studies or abstracts performed well on all items except on items 4 (the recruitment strategy was appropriate to the aims), 8 (the rigour of the data analysis) and 10 (the value of the research in terms of its contribution to the literature and/or policy and process). Due to limited information in the abstracts to clearly answer the items using the WEIRD tool, most of the abstracts were appraised as either having an unclear or serious risk of bias.<sup>25-30</sup>

### Results of sources of evidence

#### PrEP SDMs for AGYW

Amongst AGYW, PrEP SDMs were found in HF-B (n=6), hybrid (mobile clinic-healthcare facility or community-healthcare facility, n=3), research site (n=2) and mobile clinic (n=1) (see online supplementary appendix 2).

#### Health facility

Three studies from Kenya evaluated a HF-B delivery modality by integrating PrEP delivery into routine services. Mugwanya et al.<sup>31</sup> evaluated a PrEP-dedicated nurse-led integrated delivery of PrEP in family planning (FP) clinics whilst Kinuthia et al. and Pintye et al. evaluated approaches to integrate PrEP into maternal and child health (MCH) clinics providing antenatal care (ANC) and post-natal care (PNC).<sup>32 33</sup> Integration of universal screening and counselling for PrEP in FP and MCH clinics resulted in PrEP initiation of 16% and 49.2% respectively among AGYW. Younger women ( $\leq 24$  years) who initiated PrEP at MCH clinics were significantly more likely to return for a PrEP refill at month 3 compared to women  $>24$  years (54.9% versus 45.1%) ( $p=0.05$ ).<sup>32</sup> These studies utilised nurses dedicated to providing PrEP services only, which may limit applicability in a sub-Saharan setting where facilities have a limited clinical workforce. A study by Ngunjiri et al. which integrated PrEP with FP services found that PrEP dispensation was more frequent among those concurrently using effective contraception, (adjusted relative risk [aRR]=1.19; 95% confidence interval [CI]=1.08-1.32) and contraceptive use was more common among those on PrEP (aRR=1.63; 95% CI=1.18-2.25), highlighting the importance of SDMs that integrate PrEP with FP services.<sup>34</sup> Pintye et al. found that participants who initiated PrEP at MCH clinics took an additional 18 minutes for PrEP related activities over and above the time spent at the clinic to receive routine MCH services. The additional time could deter AGYW from initiating and continuing PrEP and depending on healthcare facility size and patient volume integrating PrEP into these routine services could result in several additional hours of work for nurses.<sup>33</sup> A recent study in Malawi comparing four SDMs (Model 1: standard of care, Model 2: integrated youth-friendly services, Model 3: Model 2 plus a small-group behavioural intervention, and Model 4: Model 3 plus cash transfer) found that PrEP initiation will best be promoted in youth-friendly locations such as



1  
2  
3 schools because of ease of access and comfort in the absence of adult patients and family  
4 members.  
5

#### 6 Hybrid (community-health facility)

7 Two studies evaluated the scaling up of PrEP in Kenya through integration into routine health  
8 services in drop-in centres (DICEs), public and private health facilities designed primarily for  
9 sex workers.<sup>28 35</sup> Ongwen et al. reported that within the context of the Jilinde project, which  
10 implements oral PrEP as a routine service at a public health scale in Kenya, 6.5% (n=1851)  
11 AGYW initiated PrEP, and DICEs were the preferred PrEP outlet for adolescent girls with 66%  
12 accessing services in DICEs, 25% in public clinics and 9% in private clinics. Amongst AGYW who  
13 initiated PrEP, the entry channel into the PrEP pathway was through peer educators and  
14 networks (50%); community outreaches (20%); and within health facilities (30%).<sup>28</sup> Were et  
15 al. found that among all individuals eligible for PrEP in the study which included female sex  
16 workers and MSM, 11% of AGYW initiated PrEP.<sup>35</sup> The majority (81%) of clients initiated PrEP  
17 through DICEs, whereas 14% and 5% were initiated through public and private facilities  
18 respectively. The majority of AGYW did not persist on PrEP use at month-1 (68% drop off) and  
19 month-3 (94% drop off) follow-ups. Qualitative evidence from this study found that AGYW  
20 who initiated PrEP in public and private health facilities reported insensitive referral and  
21 access to the PrEP delivery pathways where "*The (HIV) testing place is different from the place*  
22 *I was asked questions and the place for collecting the medicine is also different. We took long*  
23 *because we were walking form one place to another*".<sup>35</sup>  
24  
25  
26  
27  
28  
29  
30  
31  
32

#### 33 Research site

34 Delany-Moretlwe conducted an RCT in Tanzania and South Africa to evaluate whether  
35 empowerment clubs increased PrEP initiation and continuation among AGYW. Participants  
36 were randomised to the standard of care (SoC), which included comprehensive SRHS, with  
37 counselling and short message service (SMS) reminders for PrEP users, or to empowerment  
38 clubs plus SoC. Facilitators-led small group sessions and clinic follow-up visits for sexually  
39 active AGYW on PrEP. Across both arms, 97% initiated PrEP. PrEP continuation did not vary  
40 significantly by study arm and diminished with time (73% at Month-1, 61% at Month-3 and  
41 34% at Month-6).<sup>36</sup> Donnell et al. found that HIV incidence declined significantly after on-site  
42 provision of PrEP at the research sites.<sup>37</sup> Hill et al. found that epidemiologic HIV risk scores  
43 were positively associated with PrEP interest, and that high numbers of AGYW both above  
44 and below the high-risk cut-off were very interested in PrEP (68% vs. 63%).<sup>38</sup>  
45  
46  
47  
48  
49  
50

#### 51 Mobile

52 A South African study found that integrating PrEP with SRHS and delivering it via an  
53 adolescent-friendly mobile clinic led to an increase in both PrEP initiation and contraception.  
54 AGYW who were using contraception were significantly more likely to initiate PrEP (76%) on  
55 the same-day compared to those who were not using contraception and declined PrEP (66%)  
56 (p=0.001). Contraception was initiated by 44% of AGYW on the same-day as PrEP initiation  
57  
58  
59  
60

1  
2  
3 compared to 30% who declined PrEP ( $p=0.003$ ).<sup>29</sup> No qualitative evidence on the acceptability  
4 and feasibility of mobile delivery models were identified.  
5  
6

### 7 **Overall perceptions of SDMs by AGYW**

8  
9 In a study conducted in Malawi, Maseko et al found high levels of hypothetical PrEP  
10 acceptability among AGYW who reported that interest in PrEP depends on confidential access  
11 and discrete packaging (cartons or bottles that resemble treatment for common ailments) of  
12 the drug. Moreover, AGYW reported that youth-friendly delivery modalities such as schools  
13 and youth-friendly sections of health centres that provide “...a place for the youths to be  
14 comfortable getting these drugs...” may facilitate the initiation of PrEP as a prevention  
15 strategy.<sup>39</sup>  
16  
17  
18  
19

### 20 **PrEP SDMs for men**

21 We found one mixed method study among young South African men. PrEP was not provided,  
22 but hypothetical perceptions, barriers and enablers of PrEP initiation were assessed. Whilst  
23 only 11% of men were aware of PrEP, 62% reported that they were very likely to take it. The  
24 young men preferred to keep PrEP use a secret from their partners, friends, and family. PrEP  
25 initiation was also dependent on the SDM used. Receiving PrEP from the clinic was reported  
26 as a barrier to PrEP usage as this could incite community stigma. Young men reported that  
27 “...they (community) would immediately think that you are HIV positive already, not that you  
28 are taking the prevention one...”  
29  
30  
31  
32  
33

### 34 **PrEP SDMs for AGYW and men**

35 We found 19 studies that assessed various SDMs for linkages to PrEP for AGYW and men.  
36 Amongst AGYW and men, PrEP SDMs included hybrid (research site-healthcare facility or  
37 community-healthcare facility,  $n=8$ ), community ( $n=5$ ) and research site ( $n=6$ ). These studies  
38 either recruited serodiscordant couples or included AGYW and men as individual participants.  
39  
40  
41  
42

### 43 Hybrid

44  
45 We identified seven studies that used a hybrid model to deliver PrEP.<sup>40-46</sup>  
46  
47

48 One study from Kenya and Uganda by Heffron et al. involved a hybrid (research site- health  
49 facility) model that integrated PrEP delivery into antiretroviral therapy (ART) treatment  
50 services for high-risk HIV serodiscordant couples.<sup>40</sup> The intervention was mainly couples-  
51 based and involved HIV prevention counselling; safer conception counselling or  
52 contraceptives; counselling and HIV testing for HIV-negative partner; PrEP  
53 initiation/prescription; and referral to a local health facility for the HIV infected partner for  
54 ART. The results showed high uptake of integrated PrEP and ART with an estimated 96%  
55 reduction in HIV incidence (82.9% of couples used PrEP or ART and there were no HIV  
56 seroconversions, 14.5% used some ART and/or PrEP and 2.6% used neither PrEP nor ART).<sup>40</sup>  
57  
58  
59  
60

1  
2  
3 Qualitative evidence that explored HIV serodiscordant couple's decision-making and  
4 motivations to initiate PrEP through this integrated ART-PrEP approach showed that a positive  
5 clinical encounter with a healthcare provider and client-friendly services played a critical role  
6 in the couple's decisions to initiate and continue PrEP.<sup>45</sup> Clear messaging, in-depth  
7 counselling and friendly, non-judgmental/stigmatizing services provided by healthcare  
8 workers empowered, reassured and promoted PrEP initiation among HIV serodiscordant  
9 couples with some describing it as *"service beyond the medicine"*.<sup>45</sup> Furthermore, being at a  
10 place where service is offered to both couple (ART for the HIV positive partner and PrEP for  
11 the HIV-negative partner) motivated their decision.<sup>45</sup>  
12  
13  
14  
15  
16

17 Five studies used a hybrid mobile testing approach implemented at community health fairs,  
18 home, or local health facility.<sup>26 41-44</sup> Two studies from Kenya and Uganda showed that PrEP  
19 initiation was high (>75%) among individuals who received HIV testing on the same-day.<sup>41 43</sup>  
20 Mayer et al. found that 39% of participants initiated PrEP within 4 weeks of the community  
21 health campaign.<sup>42</sup> However, the distance between the participants and the healthcare  
22 provider influenced PrEP initiation.  
23  
24  
25  
26

27 Koss et al. and Camlin et al. who explored barriers influencing PrEP initiation using the hybrid  
28 (community-health facility) model,<sup>26 44</sup> found that PrEP initiation was hindered by HIV/ART-  
29 related stigma which emanated from the colour of the pill being the same as HIV treatment  
30 regimens, and access of PrEP services at the same facility where HIV care is provided.<sup>44</sup> Men  
31 reported that the *"... majority of us fear to go to the health center..."* and suggested  
32 alternatives such as designating a clinic day for PrEP or *"...distribute [PrEP] to the people..."*.  
33 Participants reported that healthcare workers should deliver PrEP or find delivery methods  
34 that are easily accessible by the community *"...just like they did with condoms."* Young adults  
35 who attended school outside the community could not initiate PrEP given that PrEP was only  
36 provided within study communities. Furthermore, school attendance made initiating and  
37 continuing PrEP challenging.<sup>26 44</sup>  
38  
39  
40  
41  
42  
43

#### 44 Community

45 Two South African studies conducted in a community setting explored the hypothetical  
46 opinions of PrEP among salon owners, stylists, and clients.<sup>47 48</sup> Ninety-five percent of owners  
47 and stylists and 77% of clients were comfortable with PrEP being offered at hair salons,<sup>48</sup>  
48 which provide a geographically convenient and conducive environment for receiving health  
49 services.<sup>47 48</sup> A third community-based study which used a 90-second PrEP demand creation  
50 video and informational brochures, found that 68% and 56% of young women respectively  
51 reported that they were definitely interested in learning more about and initiating PrEP. The  
52 study also found that young women preferred realistic visuals that they could identify with,  
53 rather than highly stylized models. Data evaluated by Lubwama et al. showed that 69.2% of  
54 key populations which included AGYW and serodiscordant couples were reached through  
55 drop-in centres and community-based outreach centres providing PrEP versus fixed public  
56  
57  
58  
59  
60

1  
2  
3 health facilities.<sup>49</sup> The proportion that returned for PrEP was higher among serodiscordant  
4 couples (3 months: 56.9%, 6 months: 46.8%) compared to sex workers (3 months: 37.5%, 6  
5 months: 26.3%).  
6  
7

### 8 9 Clinical Research Site

10 In three of the six studies conducted at a clinical research site,<sup>27 40 50-54</sup> PrEP was integrated  
11 with ART or with ART and other interventions such as VMMC.<sup>40 51 52</sup> Across the three studies,  
12  $\geq 95\%$  of the HIV-negative partner within serodiscordant couples initiated PrEP. The use of  
13 PrEP in combination with ART or other prevention interventions (VMMC) or conception  
14 strategies resulted in reduced HIV incidence. Serodiscordant couples found that the “couples-  
15 focused” services provided through the integrated PrEP-ART strategy strengthened their  
16 relationships. Serodiscordant couples found that the “couples-  
17 focused” services provided through the integrated PrEP-ART strategy strengthened their  
18 relationships.  
19

### 20 21 **Overall perceptions of SDMs by AGYW and men**

22 Several studies explored factors that influence PrEP initiation, non-initiation and  
23 discontinuation in individuals who received PrEP through the different SDMs.<sup>26 27 44-46 54</sup>  
24 Motivators to initiate PrEP included: perception of high-risk, preference of PrEP over other  
25 HIV prevention methods, protection from unwanted/forced sexual encounters, love for one's  
26 partner, knowledge about PrEP and the belief it is effective, partner support belief that PrEP  
27 supported life goals and a positive clinical encounter.<sup>26 27 44-46 54 55</sup> Females preferred a product  
28 that was delivered at a health clinic over accessing it at a pharmacy.<sup>56</sup> Barriers to PrEP  
29 initiation included daily pill burden, side effects, mixed dosing messaging, living with parents  
30 or attending school, partners consent or partners reaction to use and HIV-related stigma.<sup>26 27</sup>  
31  
32  
33  
34  
35 44-46 54 55  
36  
37

### 38 39 **Other models**

40 We identified four other studies that explored other methods of promoting PrEP initiation  
41 among AGYW and men.<sup>57-60</sup> Jani et al. explored male partners support for hypothetical PrEP  
42 use by AGYW.<sup>59</sup> Male partners highlighted that their support would be contingent on their  
43 early involvement in the decision-making process regarding PrEP which would alleviate  
44 suspicion of infidelity. AGYW suggested that not including male partners may result in social  
45 harms (partner violence, dissolution of relationships). Strategies recommended by male  
46 partners included couples counselling, educating, and providing PrEP to men and community  
47 sensitization. Makyao et al. explored parental support of AGYW's hypothetical use of PrEP.  
48 Parents supported PrEP availability acknowledging the risks faced by AGYW.<sup>60</sup> However,  
49 support was also influenced by social norms (promoting promiscuity or condoning sexual  
50 activity). Differential parenting roles influenced the type of support: mothers suggested  
51 providing a conducive environment (good diet) for PrEP use whilst fathers suggested  
52 providing operational support (transport money). Cremin et al. and Irungu et al. reported that  
53 providing time-limited PrEP during periods of increased exposure would be a novel, efficient  
54 and cost-effective strategy for providing PrEP.<sup>57 58</sup>  
55  
56  
57  
58  
59  
60

## Discussion

The purpose of this review was to synthesize and appraise the effects on PrEP initiation and the acceptability and feasibility of PrEP SDMs designed to promote linkage to care among AGYW and men eligible for PrEP in SSA. Given the challenging interactions between AGYW and men and the health system, we reviewed evidence of PrEP initiation in a range of SDMs i.e., health facility-, mobile-, community- based or hybrid models, and we explored the perceptions, barriers, and facilitators of these models. This scoping review identified 27 primary studies and 10 conference abstracts.

Delivery of PrEP to AGYW included HF-B models which integrated PrEP into routine FP/MCH/SRH/ANC services, hybrid models which allowed AGYW to initiate PrEP either at community-based venues or private or public facilities and mobile models. Whereas integrated models provided at a public health facility offer a potential “one-stop” location for AGYW to initiate PrEP whilst accessing other services, the additional time spent on PrEP-related activities may deter AGYW from initiation. Roche et al found in a study on integrated PrEP-FP service delivery that youth-friendly clinics are “low-hanging fruit” for PrEP delivery. The youth friendly approach and clinic flow implemented at one of the clinics required less room-to-room movement thus making PrEP delivery to AGYW easier. The second clinic which offered PrEP like any other outpatient service, with clients receiving HIV testing services at HTS points, PrEP counselling and clinical review in consultation rooms, and prescription dispensing at the pharmacy was not favoured by AGYW who did not want to queue at each service point and discuss their sexual activity in crowded FP consultation rooms.<sup>61</sup> Integrated delivery of PrEP provides an opportunity to respond to potential syndemics in AGYW who are eligible for PrEP; however, we found mixed results regarding the effectiveness of integrated models on PrEP initiation. Two studies in which PrEP was initiated in an FP or MCH clinic showed PrEP initiation of <50% with initiation being higher in women >24 years.<sup>31 32</sup> A third multi-country study which integrated PrEP with SRHS at FP clinics showed 90% PrEP initiation.<sup>30</sup> These studies were primarily implementation studies without a comparator, and PrEP related activities were provided by a PrEP-dedicated nurse. This task-shifting strategy removed this additional service from the workload of already overburdened routine nurses; however, the feasibility of this approach requires further evaluation considering the human resources challenges in SSA. Integration of HIV services and other health services has shown to be a useful strategy to improve linkage to HIV care, ART initiation and viral suppression. The most common forms of integration were (i) HIV testing and counselling added to non-HIV services and (ii) non-HIV services added to antiretroviral therapy (ART). The most commonly integrated non-HIV services were maternal and child healthcare, tuberculosis testing and treatment, primary healthcare, family planning, and sexual and reproductive health services.<sup>62</sup> Innovative adaptations are needed at public primary health facility level to overcome PrEP delivery challenges and barriers that are faced by users and staff. Irungu et al reported adaptations within integrated models such as fast tracking PrEP users to minimise

1  
2  
3 waiting times and clinicians dispensing PrEP from clinical rooms which removed waiting times  
4 at the pharmacy and mitigated any stigma associated with being seen at a pharmacy that  
5 mainly dispenses ART.<sup>63</sup>  
6  
7

8  
9 Adolescent-friendly clinics or adolescent-friendly sections within health facilities were also  
10 shown to promote initiation of PrEP.<sup>29 30 39</sup> However, a New York study of adolescents' PrEP  
11 awareness showed that 86% of adolescents eligible for PrEP reported never being informed  
12 about PrEP by their healthcare professionals.<sup>64</sup> Taggart et al. found that provider attitudes  
13 and recommendations within a healthcare facility influence adolescents' willingness or  
14 unwillingness to use PrEP.<sup>65</sup> Our results show that AGYW favour community-based youth-  
15 friendly delivery modalities of PrEP such as DICEs or schools over delivery via public and  
16 private health facilities. These findings concur with other studies which have shown that  
17 factors that influence US women's decision-making about the use of PrEP include the ease of  
18 accessing services and medication close to their homes.<sup>66 67</sup> Moreover, women highlighted  
19 the importance of community peers in influencing their decisions to initiate PrEP.<sup>67</sup>  
20  
21  
22  
23  
24  
25

26 We identified only one study among young, heterosexual men that explored the hypothetical  
27 perceptions of PrEP initiation. Men reported that if PrEP was available, they would use it.  
28 However, initiation was dependent on SDM and a HF-B model was not favoured due to  
29 community stigma.<sup>25</sup> Heterosexual men are not classified as a key or vulnerable population in  
30 the HIV prevention response, as such research that focuses on PrEP initiation or SDMs among  
31 heterosexual men is limited. Increasing the engagement of men with health services requires  
32 an understanding of the structural barriers that limit their access and requires targeted and  
33 adaptive interventions to meet the needs of men. Differentiated service delivery models (for  
34 example facility-based and/or community-based adherence clubs and quick pharmacy pick-  
35 up) has been shown to improve uptake and retention of men in HIV treatment services.<sup>68</sup>  
36 Gender-transformative interventions such as "One Man Can", a rights-based gender equality  
37 and health programme intervention, and Decentralized Medication Delivery (DMD) have also  
38 shown success in reducing masculinity-related barriers to engaging in HIV prevention  
39 services.<sup>69</sup> A recent study conducted in South Africa revealed that these differentiated service  
40 delivery models have the potential to increase adherence to medication among men in  
41 particular.<sup>70</sup> Other interventions/ models designed to help South African men initiate ART and  
42 remain in care such as the MINA and Coach Mpilo campaigns, which provide men with  
43 information and support that help them to get tested for HIV, to initiate and remain in care,  
44 could also be used to promote PrEP initiation among men.<sup>71 72</sup>  
45  
46  
47  
48  
49  
50  
51

52 In studies that targeted both women (including AGYW) and men, SDMs included a hybrid  
53 approach (research site-community or community-health facility), community-based models  
54 and those based at research sites. PrEP delivery to serodiscordant couples involved integrated  
55 models such as delivery of PrEP and ART to serodiscordant couples allows both partners to  
56 interact with the health system. In such models, PrEP is initiated and continued only until the  
57 HIV infected partner achieves viral suppression which may be a cost-effective approach if viral  
58 suppression is achieved timeously.<sup>40</sup> However, in a sub-Saharan setting where <65% of people  
59  
60

1  
2  
3 living with HIV have suppressed viral load (VL) (<1000 copies/mL) and there are health  
4 systems challenges with VL testing and turn-around-time, integrated delivery of PrEP and ART  
5 may not be feasible.<sup>1 73</sup> Our findings have shown that community-based models which involve  
6 same-day HIV testing and PrEP initiation are favourable especially among men.<sup>43</sup>  
7 Furthermore, the delivery of PrEP through innovative community-based venues such as hair  
8 salons which provided a comfortable and familiar environment yielded high interest in PrEP  
9 initiation.<sup>47</sup> Many participants reported the convenience of pharmacies located close to public  
10 transport routes, as many did not have access to cars or did not want to bear the cost of fuel  
11 incurred travelling to the clinic.<sup>74</sup>  
12  
13  
14  
15

16 Both AGYW, men and serodiscordant couples have expressed that PrEP initiation is influenced  
17 by the setting i.e., a friendly environment and by the attitude of healthcare workers i.e., non-  
18 judgmental/non-stigmatizing.<sup>30 45</sup> This suggests that the successful delivery of PrEP to AGYW  
19 or men using HF-B models either through integrated or standalone approaches requires  
20 healthcare workers to play an essential role.<sup>75 76</sup> Structural barriers to PrEP initiation included:  
21 the distance to travel to and time spent at health facilities. To address these barriers, there  
22 is an increasing need for differentiated SDMs that provide alternative access options  
23 especially considering that PrEP is a prevention intervention delivered to individuals who are  
24 generally of good health and who may be disinclined to travel long distances and wait in long  
25 queues to access PrEP.<sup>77</sup>  
26  
27  
28  
29  
30

### 31 *Policy and programme recommendations and future research areas*

32  
33 Notably, literature on PrEP SDMs for AGYW and more especially heterosexual men is limited  
34 thus calling for more research in these areas. In order to increase PrEP initiation, country  
35 programme implementers need to understand which SDM/s work for AGYW or men and to  
36 adapt these to best suit the unique needs of the users.<sup>78</sup> Opportunities exist for integrated  
37 strategies of PrEP delivery at a health facility or mobile clinic. However, we need to  
38 understand which integrated strategy (e.g., integration with ART, SRHS, or contraceptive  
39 services) is most acceptable and scalable for AGYW and men. Further research is needed  
40 among couples where one partner is on PrEP, to understand if the perception of risk changes  
41 in the partner who is not on PrEP. We identified only one conference abstract that targeted  
42 PrEP SDM among heterosexual men. This study was also limited as PrEP was not provided,  
43 but hypothetical perceptions of PrEP were assessed. This dearth of published literature  
44 highlights a major gap in the knowledge with considerably more research needed to  
45 investigate SDMs among men. Training and retraining of healthcare workers on PrEP  
46 guidelines is essential to equip them with the skills to ensure that PrEP is delivered in a friendly  
47 and safe space by non-stigmatizing healthcare workers. To mitigate the time burden and  
48 travel expenses incurred by AGYW and men, same-day initiation of PrEP to those eligible and  
49 multi-months dispensing of refills should be considered.<sup>11 77 79</sup>  
50  
51  
52  
53  
54  
55

56 Furthermore, task-shifting among healthcare workers along the PrEP cascade will avoid  
57 additional burden on the health system. Further studies are required to evaluate the  
58 feasibility of PrEP-dedicated nurses. Differentiated SDMs are needed to take PrEP to where  
59  
60

1  
2  
3 users live, socialise and work.<sup>11</sup> These models include home deliveries, pharmacies, DICEs,  
4 salons, mobile clinics and tele-medicine-assisted models in both the public and private health  
5 sectors. Mobile clinics near schools could be successful but need to be regular, reliable, and  
6 sustainable. Furthermore, considering that eligibility for continuation on PrEP requires repeat  
7 HIV testing, there is a need for interventions (e.g., HIV self-testing) to address this challenge  
8 when PrEP is delivered at non- HF-B settings.  
9  
10

### 11 12 **Strengths and limitations**

13  
14 The strengths of this review include the inclusion of multiple databases across disciplines and  
15 broad inclusion criteria. We also used a comprehensive search strategy that followed the JBI  
16 reviewer's manual and structured using PRISMA-ScR guidelines, and robust methods that  
17 included double data screening, extraction, and review. Another strength is that we included  
18 grey literature and unpublished reports which minimizes the chances of missing studies with  
19 negative or null findings.  
20  
21

22  
23  
24 Limitations include the exclusion of studies conducted in non-SSA and that were published in  
25 non-English languages. In addition, due to a lag in adding and indexing articles in various  
26 online databases, our review could fail to locate the most recent publications and research  
27 on SDMs for PrEP initiation. Another limitation was that most of the included studies were  
28 from three countries (Kenya, Uganda, and South Africa) hence the generalisability of the  
29 results to SSA might be limited. Furthermore, there were limitations in the sources of  
30 evidence as many of the studies evaluated the hypothetical perceptions of PrEP initiation and  
31 some of the feasibility and acceptability is theoretical which may not translate to actual  
32 realities. Additionally, sub analyses specifically for heterosexual men could not be done since  
33 results from some of the studies were not disaggregated by gender. Also, the extraction  
34 focuses on synthesizing the setting where PrEP is offered, which is only one component of the  
35 SDM and does not focus on other components such as the strategies or individuals providing  
36 PrEP. Due to the dearth of literature on SDMs among AGYW and men and considering that  
37 PrEP roll out in this population in many SSA countries has only recently been maximised, we  
38 included research studies to understand the SDMs in this setting. Although the recruitment  
39 criteria in a research setting may have resulted in a higher initiation of PrEP, the lessons learnt  
40 from this setting could contribute to improving the roll out of PrEP in AGYW and men. Critical  
41 appraisal of evidence from conference abstracts was limited by the information provided in  
42 the abstract. As such, many items for conference abstracts on the CASP tool were adjudicated  
43 as can't tell or unclear risk.  
44  
45  
46  
47  
48  
49  
50  
51

### 52 53 **Conclusions**

54 We conducted a scoping review on PrEP SDMs, summarising evidence on PrEP initiation using  
55 existing models among AGYW and men and explored the users' perceptions, and barriers and  
56 facilitators of these PrEP models. These models were mostly found to be hybrid approaches  
57 (research site-health facility or community-health facility), community-based or based at a  
58 research site. Community-based models at convenient locations were favoured by AGYW.  
59  
60



1  
2  
3 Integrated strategies delivered at friendly health facilities by non-stigmatising healthcare  
4 providers was also a preferred PrEP delivery channel. The successful initiation of PrEP by  
5 AGYW and men will be dependent on the service setting where it is offered and cannot be  
6 considered as a one size fits all approach. Care must be taken to find the delivery method best  
7 suited to each sub-population. Future research should focus on what differentiated SDMs  
8 work for AGYW and heterosexual men to identify which approach is most successful in  
9 improving PrEP initiation and to understand their individual needs when using these models.  
10  
11  
12  
13

### 14 **Funding**

15  
16 This work was supported by the U.S. President's Emergency Plan for AIDS Relief (PEPFAR)  
17 through the Centers for Disease Control and Prevention, under the terms of Cooperative  
18 Agreement Number 1 NU2GGH002193-01-00.  
19  
20  
21

### 22 **Disclaimer**

23  
24 The findings and conclusions in this manuscript are those of the authors and do not  
25 necessarily represent the official position of the US Centers for Disease Control and  
26 Prevention.  
27  
28  
29

### 30 **Author Contributions:**

31  
32 All authors contributed to conceptualising and designing the study. TR and WC conducted the  
33 literature search. WC, TR, KJ, NJ, DG independently performed screening. WC, TR, CM, EN, ET,  
34 MH, TMA, NJ, DG, BZ, WB and FM independently performed data extraction. EN developed  
35 the data charting form on REDCap. TR and WC performed initial data synthesis and  
36 interpretation and all authors refined it. WC and TR drafted the manuscript. All authors  
37 contributed to writing and reviewing the manuscript.  
38  
39  
40  
41

42 **Competing Interests:** None declared

43  
44 **Patient consent for publication:** Not required

45  
46 **Data availability statement:** All data relevant to the study are included in the article or  
47 uploaded as supplementary information.  
48

49  
50 **Ethics Approval:** The scoping review focuses on published research in the public domain  
51 therefore no ethics approval is required.  
52  
53  
54  
55  
56  
57  
58  
59  
60

## References

1. UNAIDS. AIDSinfo 2020 [cited 2020 21 April]. Available from: <https://aidsinfo.unaids.org/> accessed 21 April 2020.
2. UNAIDS. We've got the power: Women, Adolescent girls and the HIV response 2019 [cited 2020 21 April]. Available from: [https://www.unaids.org/sites/default/files/media\\_asset/2020\\_women-adolescent-girls-and-hiv\\_en.pdf](https://www.unaids.org/sites/default/files/media_asset/2020_women-adolescent-girls-and-hiv_en.pdf) accessed 21 April 2020.
3. Pascoe L, Peacock D, Stemple L. Reaching men: addressing the blind spot in the HIV response. *Int J Mens Soc Comm Health* 2018;1(SP1):e57-e70.
4. Colvin CJ. Strategies for engaging men in HIV services. *Lancet HIV* 2019
5. UNAIDS. HIV prevention 2020 road map. Geneva: Joint United Nations Programme on HIV2017 [cited 2020 21 April]. Available from: [https://www.unaids.org/sites/default/files/media\\_asset/hiv-prevention-2020-road-map\\_en.pdf](https://www.unaids.org/sites/default/files/media_asset/hiv-prevention-2020-road-map_en.pdf) accessed 21 April 2020.
6. World Health Organization. Guidance on Pre-exposure oral prophylaxis (PrEP) for serodiscordant couples, men who have sex with men and transgender women at high risk of HIV. Geneva: World Health Organization, 2012.
7. World Health Organization. Consolidated guidelines on the use of antiretroviral drugs for treating and preventing HIV infection: recommendations for a public health approach. Geneva Switzerland: World Health Organization 2016.
8. Dunbar MS, Kripke K, Haberer J, et al. Understanding and measuring uptake and coverage of oral pre-exposure prophylaxis delivery among adolescent girls and young women in sub-Saharan Africa. *Sex Health* 2018;15(6):513-21.
9. Ajayi AI, Mudefi E, Yusuf MS, et al. Low awareness and use of pre-exposure prophylaxis among adolescents and young adults in high HIV and sexual violence prevalence settings. *Medicine* 2019;98(43)
10. Department of Health South Africa. Guidelines for Expanding Combination Prevention and Treatment Options: Oral Pre-Exposure Prophylaxis (PrEP) and Test and Treat (T&T), 2017.
11. O'Malley G, Barnabee G, Mugwanya K. Scaling-up PrEP Delivery in Sub-Saharan Africa: What Can We Learn from the Scale-up of ART? *Curr HIV/AIDS Rep* 2019;16(2):141-50.
12. Venter WD. Pre-exposure prophylaxis: the delivery challenge. *Front Public Health* 2018;6:188.
13. Arksey H, O'Malley L. Scoping studies: towards a methodological framework. *Int J Soc Res Methodol* 2005;8(1):19-32.
14. Mays N, Roberts E, Popay J. Synthesising research evidence 2001.
15. Aromataris E, Munn Z, (Editors). Joanna Briggs Institute Reviewer's Manual: The Joanna Briggs Institute, 2017.
16. Tricco AC, Lillie E, Zarin W, et al. PRISMA extension for scoping reviews (PRISMA-ScR): checklist and explanation. *Ann Intern Med* 2018;169(7):467-73.
17. World Bank. Sub-Saharan Africa 2019 [cited 2019 25 November]. Available from: <https://data.worldbank.org/region/sub-saharan-africa> accessed 25 November 2019.
18. EndNote [program]. EndNote X7 version. Philadelphia, PA: Clarivate, 2013.
19. Ouzzani M, Hammady H, Fedorowicz Z, et al. Rayyan—a web and mobile app for systematic reviews. *Systematic reviews* 2016;5(1):1-10.

- 1
  - 2
  - 3
  - 4
  - 5
  - 6
  - 7
  - 8
  - 9
  - 10
  - 11
  - 12
  - 13
  - 14
  - 15
  - 16
  - 17
  - 18
  - 19
  - 20
  - 21
  - 22
  - 23
  - 24
  - 25
  - 26
  - 27
  - 28
  - 29
  - 30
  - 31
  - 32
  - 33
  - 34
  - 35
  - 36
  - 37
  - 38
  - 39
  - 40
  - 41
  - 42
  - 43
  - 44
  - 45
  - 46
  - 47
  - 48
  - 49
  - 50
  - 51
  - 52
  - 53
  - 54
  - 55
  - 56
  - 57
  - 58
  - 59
  - 60
20. Harris PA, Taylor R, Thielke R, et al. Research electronic data capture (REDCap)—a metadata-driven methodology and workflow process for providing translational research informatics support. *J Biomed Inform* 2009;42(2):377-81.
21. Cochrane Effective Practice and Organisation of Care (EPOC). Suggested risk of bias criteria for EPOC reviews. EPOC Resources for review authors 2017 [cited 2020 01 April]. Available from: <https://protect-za.mimecast.com/s/vgZ1C8qzwAFjg8EMlndz5c> accessed 01 April 2020.
22. Critical Appraisal Skills Programme. Qualitative Checklist 2018 [cited 2020 01 April]. Available from: <https://casp-uk.net/casp-tools-checklists/> accessed 01 April 2020.
23. Lewin S, Langlois E, Tuncalp Ö, et al. WEIRD (Ways of Evaluating Important and Relevant Data) tool: Questions to guide assessment / critical appraisal of programme descriptions, implementation descriptions and other mainly descriptive types of evidence Oslo: Norwegian Institute of Public Health 2019 [cited 2020 01 April]. Available from: [https://epoc.cochrane.org/sites/epoc.cochrane.org/files/public/uploads/Resources-for-authors2017/weird\\_tool.pdf](https://epoc.cochrane.org/sites/epoc.cochrane.org/files/public/uploads/Resources-for-authors2017/weird_tool.pdf) accessed 01 April 2020.
24. Moher D, Liberati A, Tetzlaff J, et al. Preferred Reporting Items for Systematic Reviews and Meta-Analyses: The PRISMA Statement. *PLoS Med* 2009;6(7):e1000097. doi: 10.1371/journal.pmed.1000097
25. Bell J, Sharma S, Hasen N, et al. Awareness of PrEP and drivers and barriers to use among men aged 20-34 in Mpumalanga and KwaZulu-Natal, South Africa [abstract]. IAS 2019. Mexico City, Mexico, 2019.
26. Koss CA, Ayieko J, Owaraganise A, et al. Survey of Early Barriers to PrEP Uptake among Clients and Community Members in the SEARCH Study in Rural Kenya and Uganda [abstract]. IAS 2017. Paris, France, 2017.
27. Atujuna M, Newman PA, Wallace M, et al. Contexts of vulnerability and the acceptability of new biomedical HIV prevention technologies among key populations in South Africa: A qualitative study. *PLoS One* 2018;13(2):e0191251. doi: <https://doi.org/10.1371/journal.pone.0191251>
28. Ong'wen P, Musau A, D W, et al. Adolescent girls on PrEP: Findings from Kenya's oral PrEP scale-up supported by Jilinde [abstract]. IAS 2019. Mexico City, Mexico, 2019.
29. Rousseau E, Baeten J, Morton J, et al. Association between contraceptive use and PrEP uptake and continuation in adolescent girls and young women in Cape Town, South Africa [abstract]. IAS 2019. Mexico City, Mexico, 2019.
30. Travill D, Bekker L, Delany-Moretlwe S, et al. Sexual behavior and PrEP uptake among young African women in a demonstration project about PrEP delivery [abstract]. AIDS 2018. Amsterdam, Netherlands, 2018.
31. Mugwanya KK, Pintye J, Kinuthia J, et al. Integrating preexposure prophylaxis delivery in routine family planning clinics: A feasibility programmatic evaluation in Kenya. *PLoS Med* 2019;16(9) doi: <https://doi.org/10.1371/journal.pmed.1002885>
32. Kinuthia J, Pintye J, Abuna F, et al. Pre-exposure prophylaxis uptake and early continuation among pregnant and post-partum women within maternal and child health clinics in Kenya: results from an implementation programme. *Lancet HIV* 2020;7(1):E38-E48. doi: [https://doi.org/10.1016/S2352-3018\(19\)30335-2](https://doi.org/10.1016/S2352-3018(19)30335-2)
33. Pintye J, Kinuthia J, Allen Roberts D, et al. Integration of PrEP services into routine antenatal and postnatal care: Experiences from an implementation program in western Kenya. *J Acquir Immune Defic Syndr* 2018;79(5):590-95.

- 1
- 2
- 3
- 4 34. Ngure K, Velloza J, Patel RC, et al. Alignment of PrEP use and effective contraceptive use
- 5 among East African women in HIV serodiscordant partnerships. *International Journal*
- 6 *of STD and AIDS* 2020;31(13):1263-71. doi: 10.1177/0956462420951501
- 7 35. Were D, Musau A, Mutegi J, et al. Using a HIV prevention cascade for identifying missed
- 8 opportunities in PrEP delivery in Kenya: results from a programmatic surveillance
- 9 study. *J Int AIDS Soc* 2020;23:e25537.
- 10 36. Delany-Moretlwe S, Chersich M, Harvey S, et al. Empowerment clubs did not increase
- 11 PrEP continuation among adolescent girls and young women in South Africa and
- 12 Tanzania - Results from the EMPOWER randomised trial [abstract]. AIDS 2018.
- 13 Amsterdam, Netherlands, 2018.
- 14 37. Donnell D, Beesham I, Welch JD, et al. Incorporating oral PrEP into standard prevention
- 15 services for South African women: a nested interrupted time-series study. *Arch Sex*
- 16 *Behav* 2021 doi: 10.1007/s10508-020-01880-y
- 17 10.1016/s2352-3018(21)00048-5 [published Online First: 2021/05/07]
- 18 38. Hill LM, Maseko B, Chagomerana M, et al. HIV risk, risk perception, and PrEP interest
- 19 among adolescent girls and young women in Lilongwe, Malawi: operationalizing the
- 20 PrEP cascade. *J Int AIDS Soc* 2020;23:e25502.
- 21 39. Maseko B, Hill LM, Phanga T, et al. Perceptions of and interest in HIV pre-exposure
- 22 prophylaxis use among adolescent girls and young women in Lilongwe, Malawi. *PLoS*
- 23 *One* 2020;15(1):e0226062. doi: <https://doi.org/10.1371/journal.pone.0226062>
- 24 40. Heffron R, Ngure K, Odoyo J, et al. Pre-exposure prophylaxis for HIV-negative persons
- 25 with partners living with HIV: uptake, use, and effectiveness in an open-label
- 26 demonstration project in East Africa. *Gates Open Res* 2018;1:3. doi:
- 27 <https://dx.doi.org/10.12688/gatesopenres.12752.2>
- 28 41. Koss CA, Ayieko J, Mwangwa F, et al. Early Adopters of Human Immunodeficiency Virus
- 29 Preexposure Prophylaxis in a Population-based Combination Prevention Study in
- 30 Rural Kenya and Uganda. *Clin Infect Dis* 2018;67(12):1853-60. doi:
- 31 <https://doi.org/10.1093/cid/ciy390>
- 32 42. Mayer CM, Owaraganise A, Kabami J, et al. Distance to clinic is a barrier to PrEP uptake
- 33 and visit attendance in a community in rural Uganda. *J Int AIDS Soc*
- 34 2019;22(4):e25276.
- 35 43. Koss CA, Charlebois ED, Ayieko J, et al. Uptake, engagement, and adherence to pre-
- 36 exposure prophylaxis offered after population HIV testing in rural Kenya and Uganda:
- 37 72-week interim analysis of observational data from the SEARCH study. *Lancet HIV*
- 38 2020
- 39 44. Camlin CS, Koss CA, Getahun M, et al. Understanding Demand for PrEP and Early
- 40 Experiences of PrEP Use Among Young Adults in Rural Kenya and Uganda: A
- 41 Qualitative Study. *AIDS Behav* 2020
- 42 45. Ngure K, Heffron R, Curran K, et al. I Knew I Would Be Safer. Experiences of Kenyan HIV
- 43 Serodiscordant Couples Soon After Pre-Exposure Prophylaxis (PrEP) Initiation. *AIDS*
- 44 *Patient Care STDS* 2016;30(2):78-83.
- 45 46. Gombe M, Cakouros B, Ncube G, et al. Key barriers and enablers associated with uptake
- 46 and continuation of oral pre-exposure prophylaxis (PrEP) in the public sector in
- 47 Zimbabwe: Qualitative perspectives of general population clients at high risk for HIV.
- 48 *PLoS One* 2020;15(1) doi: <https://doi.org/10.1371/journal.pone.0227632>
- 49
- 50
- 51
- 52
- 53
- 54
- 55
- 56
- 57
- 58
- 59
- 60

- 1
- 2
- 3
- 4 47. Bassett IV, Govere S, Millham L, et al. Contraception, HIV Services, and PrEP in South
- 5 African Hair Salons: A Qualitative Study of Owner, Stylist, and Client Perspectives. *J*
- 6 *Community Health* 2019;44(6):1150-59.
- 7 48. Bassett IV, Xu A, Govere S, et al. Contraception and PrEP in South African Hair Salons:
- 8 Owner, Stylist, and Client Views. *J Acquir Immune Defic Syndr* 2018;79(2):E78-E81.
- 9 doi: <https://dx.doi.org/10.1097%2FQAI.0000000000001794>
- 10 49. Lubwama J, Alamo S, Ajulong C, et al. Preexposure Prophylaxis for Key Populations In
- 11 Uganda: Early Scale-Up Lessons [abstract]. CROI 2019. Seattle, Washington, 2019.
- 12 50. Baeten JM, Heffron R, Kidoguchi L, et al. Integrated Delivery of Antiretroviral Treatment
- 13 and Pre-exposure Prophylaxis to HIV-1-Serodiscordant Couples: A Prospective
- 14 Implementation Study in Kenya and Uganda. *PLoS Med* 2016;13(8) doi:
- 15 <https://dx.doi.org/10.1371%2Fjournal.pmed.1002099>
- 16 51. Heffron R, Ngunjiri K, Vellozo J, et al. Implementation of a comprehensive safer conception
- 17 intervention for HIV-serodiscordant couples in Kenya: uptake, use and effectiveness.
- 18 *J Int AIDS Soc* 2019;22(4) doi: <https://doi.org/10.1002/jia2.25261>
- 19 52. Heffron R, Thomson K, Celum C, et al. Fertility Intentions, Pregnancy, and Use of PrEP
- 20 and ART for Safer Conception Among East African HIV Serodiscordant Couples. *AIDS*
- 21 *Behav* 2018;22(6):1758-65.
- 22 53. Morton JF, Myers L, Gill K, et al. Evaluation of a behavior-centered design strategy for
- 23 creating demand for oral PrEP among young women in Cape Town, South Africa.
- 24 *Gates Open Res* 2020;4
- 25 54. Ware NC, Pisarski EE, Nakku-Joloba E, et al. Integrated delivery of antiretroviral
- 26 treatment and pre-exposure prophylaxis to HIV-1 serodiscordant couples in East
- 27 Africa: a qualitative evaluation study in Uganda. *J Int AIDS Soc* 2018;21(5):e25113.
- 28 55. Sack DE, De Schacht C, Paulo P, et al. Pre-exposure prophylaxis use among HIV
- 29 serodiscordant couples: a qualitative study in Mozambique. *Global Health Action*
- 30 2021;14(1) doi: 10.1080/16549716.2021.1940764
- 31 56. Minnis AM, Atujuna M, Browne EN, et al. Preferences for long-acting Pre-Exposure
- 32 Prophylaxis (PrEP) for HIV prevention among South African youth: results of a
- 33 discrete choice experiment. *J Int AIDS Soc* 2020;23(6):e25528.
- 34 57. Cremin I, Morales F, Jewell BL, et al. Seasonal PrEP for partners of migrant miners in
- 35 southern Mozambique: a highly focused PrEP intervention. *J Int AIDS Soc*
- 36 2015;18(4):19946.
- 37 58. Irungu EM, Sharma M, Maronga C, et al. The Incremental Cost of Delivering PrEP as a
- 38 Bridge to ART for HIV Serodiscordant Couples in Public HIV Care Clinics in Kenya.
- 39 *AIDS Res Treat* 2019;2019 doi: <https://doi.org/10.1155/2019/4170615>
- 40 59. Jani N, Pilgrim N, Saria V, et al. Will male partners of adolescent girls and young women
- 41 (AGYW) support their PrEP use? A comparative analysis of AGYW and male partners
- 42 of AGYW views in Tanzania [abstract]. AIDS 2018. Amsterdam, Netherlands, 2018.
- 43 60. Makyao N, Saria V, Jani N, et al. How will social norms about parenting influence
- 44 parental support of adolescent girls and young women's (AGYW) use of PrEP?
- 45 Perspectives from parents in Tanzania [abstract]. AIDS 2018. Amsterdam,
- 46 Netherlands, 2018.
- 47 61. Roche SD, Barnabee G, Omollo V, et al. Implementation strategies for integrating pre-
- 48 exposure prophylaxis for HIV prevention and family planning services for adolescent
- 49 girls and young women in Kenya: a qualitative study. *BMC health services research*
- 50 2022;22(1):1-15.
- 51
- 52
- 53
- 54
- 55
- 56
- 57
- 58
- 59
- 60

- 1
- 2
- 3
- 4 62. Bulstra CA, Hontelez JA, Otto M, et al. Integrating HIV services and other health services:  
5 A systematic review and meta-analysis. *PLoS medicine* 2021;18(11):e1003836.
- 6 63. Surmounting PrEP delivery challenges through adaptation of implementation guidelines:  
7 Lessons learned from HIV care clinics in Kenya. *JOURNAL OF THE INTERNATIONAL*  
8 *AIDS SOCIETY*; 2019. JOHN WILEY & SONS LTD THE ATRIUM, SOUTHERN GATE,  
9 CHICHESTER PO19 8SQ, W ....
- 10 64. Santos RP, Adams ME, Lepow M, et al. Adolescents' Knowledge and Acceptance of Pre-  
11 exposure Prophylaxis (PrEP) in the Capital District Region of New York. *Open Forum*  
12 *Infectious Diseases* 2018;5(Suppl 1):S393.
- 13 65. Taggart T, Liang Y, Pina P, et al. Awareness of and willingness to use PrEP among Black  
14 and Latinx adolescents residing in higher prevalence areas in the United States. *PLoS*  
15 *One* 2020;15(7):e0234821.
- 16 66. Aaron E, Blum C, Seidman D, et al. Optimizing delivery of HIV preexposure prophylaxis  
17 for women in the United States. *AIDS Patient Care STDs* 2018;32(1):16-23.
- 18 67. Auerbach JD, Kinsky S, Brown G, et al. Knowledge, attitudes, and likelihood of pre-  
19 exposure prophylaxis (PrEP) use among US women at risk of acquiring HIV. *AIDS*  
20 *Patient Care STDs* 2015;29(2):102-10.
- 21 68. Mukumbang FC. Leaving no man behind: how differentiated service delivery models  
22 increase men's engagement in HIV care. *International Journal of Health Policy and*  
23 *Management* 2021;10(3):129.
- 24 69. Fleming PJ, Colvin C, Peacock D, et al. What role can gender-transformative  
25 programming for men play in increasing men's HIV testing and engagement in HIV  
26 care and treatment in South Africa? *Culture, health & sexuality* 2016;18(11):1251-64.
- 27 70. Fox MP, Pascoe S, Huber AN, et al. Adherence clubs and decentralized medication  
28 delivery to support patient retention and sustained viral suppression in care: Results  
29 from a cluster-randomized evaluation of differentiated ART delivery models in South  
30 Africa. *PLoS medicine* 2019;16(7):e1002874.
- 31 71. Hlongwa M, Cornell M, Malone S, et al. Uptake and Short-Term Retention in HIV  
32 Treatment Among Men in South Africa: The Coach Mpilo Pilot Project. *Global Health:*  
33 *Science and Practice* 2022;10(1)
- 34 72. The Aurum Institute. Men's Health Month: Aurum partners to implement campaigns  
35 supporting men living with HIV. [2021 [Available from:  
36 [https://www.auruminstitute.org/component/content/article/28-blog/aurum-](https://www.auruminstitute.org/component/content/article/28-blog/aurum-news/455-men-s-health-month-mina-and-coach-mpilo-fight-the-stigma-for-men-living-with-hiv?Itemid=101)  
37 [news/455-men-s-health-month-mina-and-coach-mpilo-fight-the-stigma-for-men-](https://www.auruminstitute.org/component/content/article/28-blog/aurum-news/455-men-s-health-month-mina-and-coach-mpilo-fight-the-stigma-for-men-living-with-hiv?Itemid=101)  
38 [living-with-hiv?Itemid=101](https://www.auruminstitute.org/component/content/article/28-blog/aurum-news/455-men-s-health-month-mina-and-coach-mpilo-fight-the-stigma-for-men-living-with-hiv?Itemid=101) accessed 26 Nov. 2021.
- 39 73. Lecher S, Williams J, Fonjongo PN, et al. Progress with scale-up of HIV viral load  
40 monitoring—seven sub-Saharan African countries, January 2015–June 2016.  
41 *Morbidity and Mortality Weekly Report* 2016;65(47):1332-35.
- 42 74. Smith DK, Toledo L, Smith DJ, et al. Attitudes and program preferences of African-  
43 American urban young adults about pre-exposure prophylaxis (PrEP). *AIDS Educ Prev*  
44 2012;24(5):408-21.
- 45 75. Rubtsova A, M Wingood G, Dunkle K, et al. Young adult women and correlates of  
46 potential adoption of pre-exposure prophylaxis (PrEP): results of a national survey.  
47 *Curr HIV Res* 2013;11(7):543-48.
- 48 76. Wingood GM, Dunkle K, Camp C, et al. Racial differences and correlates of potential  
49 adoption of pre-exposure prophylaxis (PrEP): results of a national survey. *J Acquir*  
50 *Immune Defic Syndr* 2013;63(0 1):S95.
- 51
- 52
- 53
- 54
- 55
- 56
- 57
- 58
- 59
- 60

- 1  
2  
3 77. Sullivan PS, Mena L, Elopre L, et al. Implementation strategies to increase PrEP uptake in  
4 the South. *Curr HIV/AIDS Rep* 2019;16(4):259-69.  
5  
6 78. Mugo NR, Ngure K, Kiragu M, et al. PrEP for Africa: what we have learnt and what is  
7 needed to move to program implementation. *Curr Opin HIV AIDS* 2016;11(1):80.  
8  
9 79. Siegler AJ, Steehler K, Sales JM, et al. A Review of HIV Pre-exposure Prophylaxis  
10 Streamlining Strategies. *Curr HIV/AIDS Rep* 2020:1-11.  
11  
12  
13  
14  
15  
16  
17  
18  
19  
20  
21  
22  
23  
24  
25  
26  
27  
28  
29  
30  
31  
32  
33  
34  
35  
36  
37  
38  
39  
40  
41  
42  
43  
44  
45  
46  
47  
48  
49  
50  
51  
52  
53  
54  
55  
56  
57  
58  
59  
60

For peer review only

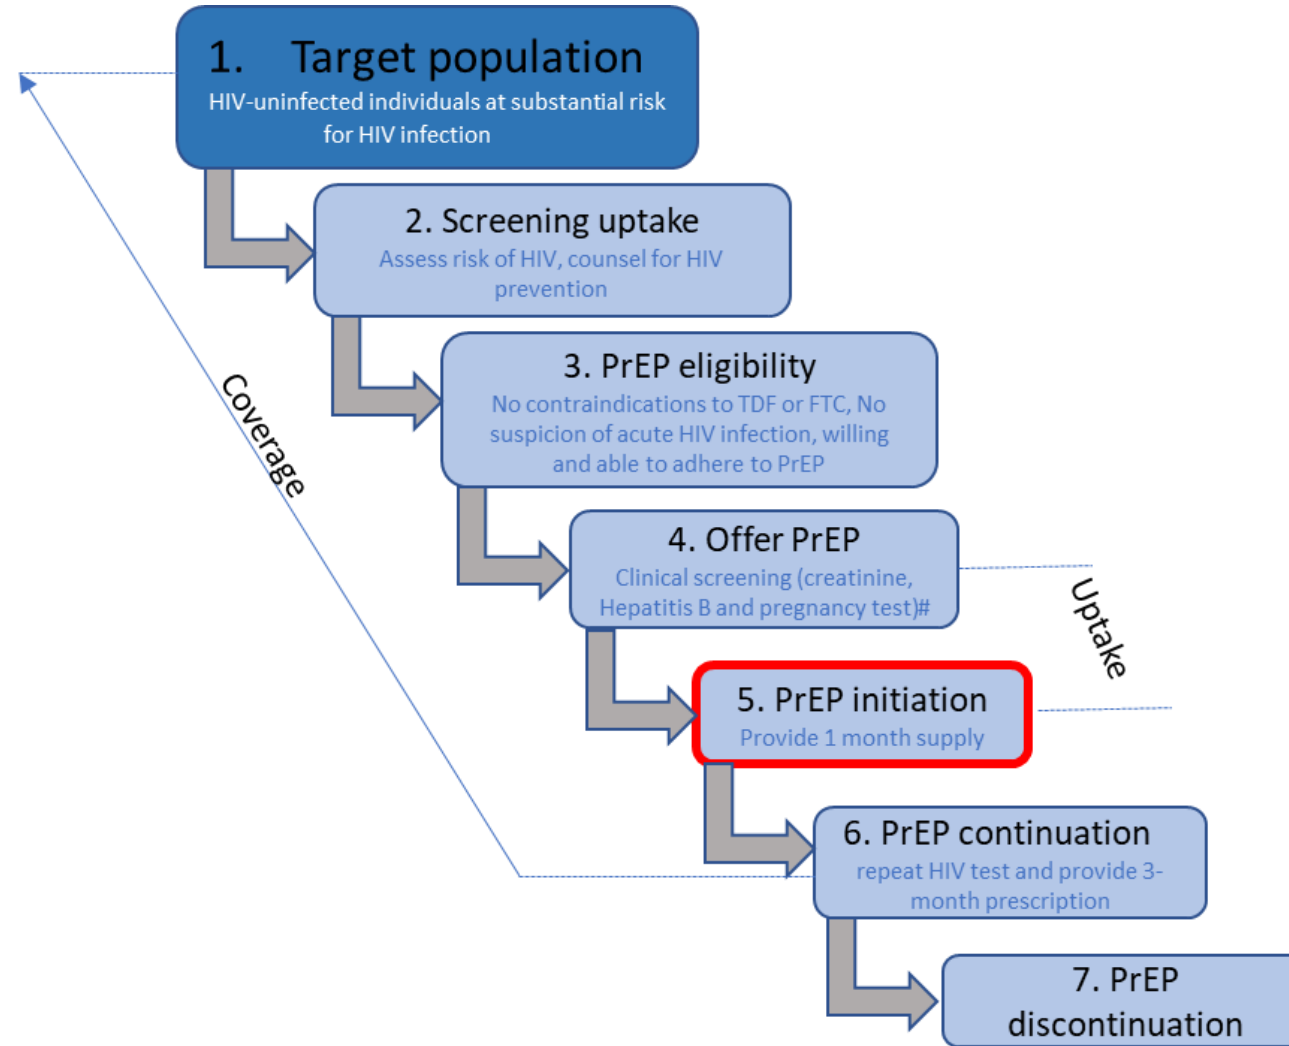

1  
2  
3  
4  
5  
6  
7  
8  
9  
10  
11  
12  
13  
14  
15  
16  
17  
18  
19  
20  
21  
22  
23  
24  
25  
26  
27  
28  
29  
30  
31  
32  
33  
34  
35  
36  
37  
38  
39  
40  
41





1  
2  
3  
4  
5  
6  
7  
8  
9  
10  
11  
12  
13  
14  
15  
16  
17  
18  
19  
20  
21  
22  
23  
24  
25  
26  
27  
28  
29  
30  
31  
32  
33  
34  
35  
36  
37  
38  
39  
40  
41

| SET |                                   | SEARCH TERMS                                                                     |
|-----|-----------------------------------|----------------------------------------------------------------------------------|
| 1   | <b>1 HIV</b>                      | HIV-1                                                                            |
| 2   |                                   | HIV                                                                              |
| 3   |                                   | Hiv                                                                              |
| 4   |                                   | Set 1- 3 will be combined with "or"                                              |
| 5   | <b>2 Pre-exposure Prophylaxis</b> | PRE-EXPOSURE PROPHYLAXIS                                                         |
| 6   |                                   | Pre-Exposure Prophylaxis                                                         |
| 7   |                                   | PrEP                                                                             |
| 8   |                                   | Set 5-7 will be combined with "or"                                               |
| 9   |                                   | Set 4 and 8 will be combined with "and"                                          |
| 10  | <b>3 Linkage to care</b>          | service provision                                                                |
| 11  |                                   | service delivery                                                                 |
| 12  |                                   | SDMs                                                                             |
| 13  |                                   | IMPLEMENTATION SCIENCE                                                           |
| 14  |                                   | model                                                                            |
| 15  |                                   | models of care                                                                   |
| 16  |                                   | differentiated care                                                              |
| 17  |                                   | linkage                                                                          |
| 18  |                                   | linkage to care                                                                  |
| 19  |                                   | intervention                                                                     |
| 20  |                                   | Set 10-19 will be combined with "or"                                             |
| 21  |                                   | Set 4, 9 and 20 will be combined with "and"                                      |
| 22  | <b>4 Country</b>                  | DEVELOPING COUNTRY                                                               |
| 23  |                                   | Sub-Saharan                                                                      |
| 24  |                                   | AFRICA SOUTH OF THE SAHARA                                                       |
| 25  |                                   | AFRICA                                                                           |
| 26  |                                   | <i>All sub-Saharan countries included as MeSH and text term combined with or</i> |
| 27  |                                   | Set 22-26 will be combined with "or"                                             |
| 28  |                                   | Set 4, 9, 20 and 27 will be combined with "and"                                  |

| Service Delivery Modality          | Author (Year) and study setting                  | Publication type and objectives                                                                                                                                 | Study population and Sample                                                                                                                                                                                                                                              | Intervention description                                                                                                                                                                                                                                                                                                                                                                                                                                                                                                                                                                                                                   | Detailed Description of Findings                                                                                                                                                                                                                                                                                                                                                                                                                                                                                                                                                                                                                                                                                                                                                                                                                                                                                                                                                                                |
|------------------------------------|--------------------------------------------------|-----------------------------------------------------------------------------------------------------------------------------------------------------------------|--------------------------------------------------------------------------------------------------------------------------------------------------------------------------------------------------------------------------------------------------------------------------|--------------------------------------------------------------------------------------------------------------------------------------------------------------------------------------------------------------------------------------------------------------------------------------------------------------------------------------------------------------------------------------------------------------------------------------------------------------------------------------------------------------------------------------------------------------------------------------------------------------------------------------------|-----------------------------------------------------------------------------------------------------------------------------------------------------------------------------------------------------------------------------------------------------------------------------------------------------------------------------------------------------------------------------------------------------------------------------------------------------------------------------------------------------------------------------------------------------------------------------------------------------------------------------------------------------------------------------------------------------------------------------------------------------------------------------------------------------------------------------------------------------------------------------------------------------------------------------------------------------------------------------------------------------------------|
| <b>Studies among AGYW</b>          |                                                  |                                                                                                                                                                 |                                                                                                                                                                                                                                                                          |                                                                                                                                                                                                                                                                                                                                                                                                                                                                                                                                                                                                                                            |                                                                                                                                                                                                                                                                                                                                                                                                                                                                                                                                                                                                                                                                                                                                                                                                                                                                                                                                                                                                                 |
| <b>Health facility<sup>a</sup></b> | Maseko et al. (2020) <sup>39</sup><br><br>Malawi | Research article<br><br>To understand knowledge of, interest in, concerns about, and delivery preferences for PrEP among AGYW enrolled in the Girl Power study. | <b>Study population:</b><br>Never been offered to use PrEP services (hypothetical opinions related to PrEP)<br><b>Sample</b><br><b>Sample size (total – N):</b> 40<br><b>Gender distribution:</b> Female: 100%<br><b>Age distribution:</b><br>15-19yrs: 21; 20-24yrs: 19 | <b>Nature of Intervention:</b> Four models of service-delivery were compared in four separate clinics: Model 1) standard of care (SoC), Model 2) Integrated youth-friendly health services; Model 3) Model 2 plus a small-group behavioural intervention on; and Model 4) Model 3 plus a cash transfer (\$5.50/month). An explanation of PrEP was provided to 40 participants prior to IDI<br><b>Intervention components:</b> HIV testing, syndromic management of STIs, family planning, and condom distribution.<br><b>NB:</b> PrEP was not provided in this study, nor was it available in government clinics at the time of the study. | <ul style="list-style-type: none"> <li>• Interest in PrEP based on a belief that their HIV risk exposure was due to factors that were out of their control, including partners having concurrent relationships, challenges with condom negotiation/use, and rape.</li> <li>• Disinterest in PrEP included: perception of low risk because of abstinence or having a single partner, use of PrEP implying infidelity among married AGYW, taking pills daily implying HIV infection.</li> <li>• Interest in initiating PrEP depends upon: <ul style="list-style-type: none"> <li>- ease of accessing PrEP (confidential),</li> <li>- packaging attributes (discrete, cartons, packets, or bottles that would give the appearance of medications for common ailments preferred</li> <li>- delivery context (available in locations frequented by youth such as schools or youth friendly spaces because of ease of access and comfort in the absence of adult patients and family members).</li> </ul> </li> </ul> |

|                                           |                                                         |                                                                                                                                                                                               |                                                                                                                                                                                                                                                                                                           |                                                                                                                                                                                                                                                                                                                                                                                                                                                                                                                                                                                                                                                    |                                                                                                                                                                                                                                                                                                                                                                                                                                                                                                                                                                                                                                                                                                                                                                                                                                                                                                                                                                                                                                                                                                                                                                                                                    |
|-------------------------------------------|---------------------------------------------------------|-----------------------------------------------------------------------------------------------------------------------------------------------------------------------------------------------|-----------------------------------------------------------------------------------------------------------------------------------------------------------------------------------------------------------------------------------------------------------------------------------------------------------|----------------------------------------------------------------------------------------------------------------------------------------------------------------------------------------------------------------------------------------------------------------------------------------------------------------------------------------------------------------------------------------------------------------------------------------------------------------------------------------------------------------------------------------------------------------------------------------------------------------------------------------------------|--------------------------------------------------------------------------------------------------------------------------------------------------------------------------------------------------------------------------------------------------------------------------------------------------------------------------------------------------------------------------------------------------------------------------------------------------------------------------------------------------------------------------------------------------------------------------------------------------------------------------------------------------------------------------------------------------------------------------------------------------------------------------------------------------------------------------------------------------------------------------------------------------------------------------------------------------------------------------------------------------------------------------------------------------------------------------------------------------------------------------------------------------------------------------------------------------------------------|
| <p><b>Health facility<sup>b</sup></b></p> | <p>Mugwanya et al. (2019)<sup>31</sup></p> <p>Kenya</p> | <p>Research article</p> <p>To demonstrate the feasibility of integrating PrEP delivery within routine family planning clinics to reach at-risk AGYW for PrEP in HIV high burden settings.</p> | <p><b>Study population:</b><br/>Offered to use PrEP services</p> <p><b>Sample</b><br/><i>Sample size (total – N):</i> 1271<br/><i>Gender distribution:</i> Female: 100%<br/><i>Age distribution:</i><br/>Median: 25 (22-29)<br/>&lt;20: 105<br/>20-24: 522<br/>25-29: 356<br/>30-34: 172<br/>≥35: 116</p> | <p><b>Nature of Intervention:</b> PrEP-dedicated nurse-led integrated delivery of PrEP in family planning clinics</p> <p><b>Intervention components:</b><br/>Newly hired nurses were trained on HIV risk assessment, counselling, and PrEP provision. These nurses performed only these duties at the FP clinic. Women attending FP clinics completed other services were then referred to the PrEP-dedicated nurse. This nurse counselled and assessed willingness to consider PrEP (guided by a national guidelines and HIV risk assessment screening tool). Interested and medically eligible women were provided same-day PrEP initiation.</p> | <ul style="list-style-type: none"> <li>• Of 1,271 women screened, 22% initiated PrEP, and 41% returned for at least one refill.</li> <li>• PrEP uptake was independently associated with reported male-partner HIV status (<math>p &lt; 0.001</math>) and marital status (<math>p = 0.04</math>).</li> <li>• More women &gt;24 years (26%) initiated PrEP compared to young women &lt;24 years (16%).</li> <li>• For women &gt;24 years, the likelihood of initiating PrEP increased by about 3% for each additional year of a woman's age (<math>p &lt; 0.001</math>).</li> <li>• FP clinics can be an effective platform to efficiently reach HIV at-risk women who may benefit from PrEP.</li> <li>• Integration of PrEP delivery in FP clinics, makes this a potential "one-stop" location for FP and PrEP.</li> <li>• Although FP visits are busy, efficient implementation strategies such as less frequent PrEP visits and expanding the pool of providers who might be able to screen and provide PrEP beyond the few clinicians and nurses (e.g., training and empowering HIV testing counsellors and community health workers or peer educators) can be built into existing routine services.</li> </ul> |
| <p><b>Health facility<sup>b</sup></b></p> | <p>Pintye et al. (2018)<sup>33</sup></p> <p>Kenya</p>   | <p>Research article</p> <p>To define approaches for integrating PrEP into routine</p>                                                                                                         | <p><b>Study population:</b><br/>Offered to use PrEP services</p> <p><b>Sample</b></p>                                                                                                                                                                                                                     | <p><b>Nature of Intervention:</b> Nurse-led teams worked with maternal and child health (MCH) staff at 16 public, faith-based, and</p>                                                                                                                                                                                                                                                                                                                                                                                                                                                                                                             | <ul style="list-style-type: none"> <li>• Clinics developed two approaches for integrating PrEP delivery within ANC/PNC: 1) co-delivery: ANC/PNC and</li> </ul>                                                                                                                                                                                                                                                                                                                                                                                                                                                                                                                                                                                                                                                                                                                                                                                                                                                                                                                                                                                                                                                     |

|                        |                                                   |                                                                                                                                             |                                                                                                                                                                                                                                                                                       |                                                                                                                                                                                                                                                                                                                                                                                                                                                                                                                                                                                                                                    |                                                                                                                                                                                                                                                                                                                                                                                                                                                                                                                                                                                                                                                                                                                                                                                                                                                                                 |
|------------------------|---------------------------------------------------|---------------------------------------------------------------------------------------------------------------------------------------------|---------------------------------------------------------------------------------------------------------------------------------------------------------------------------------------------------------------------------------------------------------------------------------------|------------------------------------------------------------------------------------------------------------------------------------------------------------------------------------------------------------------------------------------------------------------------------------------------------------------------------------------------------------------------------------------------------------------------------------------------------------------------------------------------------------------------------------------------------------------------------------------------------------------------------------|---------------------------------------------------------------------------------------------------------------------------------------------------------------------------------------------------------------------------------------------------------------------------------------------------------------------------------------------------------------------------------------------------------------------------------------------------------------------------------------------------------------------------------------------------------------------------------------------------------------------------------------------------------------------------------------------------------------------------------------------------------------------------------------------------------------------------------------------------------------------------------|
|                        |                                                   | antenatal and post-natal care (ANC/PNC) using PrIYA Program as a case study.                                                                | <p><b>Sample size (total – N):</b> 16 Health facilities; 40 program-supported nurses</p> <p><b>Gender distribution:</b> Female 100%</p> <p><b>Age distribution:</b> not described</p>                                                                                                 | <p>private facilities to determine optimal clinic flow for PrEP integration into antenatal (ANC) and postnatal (PNC) care. A program-dedicated nurse facilitated integration.</p> <p><b>Intervention components:</b></p> <p>All ANC/PNC clients received assessment for behavioural risk (completion of a questionnaire and willingness to consider PrEP, general informational counselling on PrEP depending on the client's awareness and interest in PrEP. Among clients who were willing to initiate PrEP, PrEP counselling also included information on how to use PrEP and adherence as well as medication dispensation.</p> | <p>PrEP services delivered by same MCH nurse or 2) sequential services: PrEP services after ANC/PNC by a PrEP-specialized nurse.</p> <ul style="list-style-type: none"> <li>• 86 ANC/PNC visits were observed.</li> <li>• Clients who initiated PrEP took a median of 18 minutes (IQR 15-26) for PrEP-related activities (risk assessment, PrEP counselling, creatinine testing, dispensation, and documentation) in addition to other routine ANC/PNC activities.</li> <li>• For clients who declined PrEP, an additional 13 minutes (IQR 7-15) was spent on PrEP-related risk assessment and counselling.</li> <li>• PrEP-specific activities took &lt;20 minutes per client, the moderate additional time burden for PrEP initiation in MCH would likely decline with community awareness and innovations such as group/peer counselling or expedited dispensing.</li> </ul> |
| <b>Health facility</b> | Kinuthia et al. (2020) <sup>32</sup><br><br>Kenya | <p>Research article</p> <p>We implemented and evaluated a novel programme to provide PrEP in maternal and child health clinics in Kenya</p> | <p><b>Study population:</b><br/>Offered to use PrEP services</p> <p><b>Sample</b></p> <p><b>Sample size (total – N):</b><br/>9376 women</p> <p><b>Gender distribution:</b><br/>Female:100%</p> <p><b>Age distribution:</b><br/>&lt;24: 5033<br/>Median age: 24 years (IQR: 21-28)</p> | <p><b>Nature of Intervention:</b></p> <p>Integration of PrEP into existing structures at 16 maternal and child health clinics (public, faith-based, and private sector) At each facility, they offered sensitisation sessions to introduce the programme, educate facility staff on PrEP, and seek advice on the best way to integrate PrEP delivery at the facility.</p>                                                                                                                                                                                                                                                          | <ul style="list-style-type: none"> <li>• PrEP initiation: 2030 (21.7%) women-initiated PrEP: 79.3% women with partners living with HIV, 37.2% with partners of unknown HIV status, and 11.6% women with HIV-negative partners.</li> <li>• 999 (49.2%) women who initiated PrEP were younger than 24 years</li> <li>• Reasons for initiating PrEP: having a partner living with HIV</li> </ul>                                                                                                                                                                                                                                                                                                                                                                                                                                                                                   |

1  
2  
3  
4  
5  
6  
7  
8  
9  
10  
11  
12  
13  
14  
15  
16  
17  
18  
19  
20  
21  
22  
23  
24  
25  
26  
27  
28  
29  
30  
31  
32  
33  
34  
35  
36  
37

For peer review only

|                        |                                                 |                                                                                     |                                                                                             |                                                                                                                                                                                                                                                                                                                                                                                                                                                                                                                                 |                                                                                                                                                                                                                                                                                                                                                                                                                                                                                                                                                                                                                                                                                                                                                                                                                                                                                                                                                                                                                                                                                                                                                                       |
|------------------------|-------------------------------------------------|-------------------------------------------------------------------------------------|---------------------------------------------------------------------------------------------|---------------------------------------------------------------------------------------------------------------------------------------------------------------------------------------------------------------------------------------------------------------------------------------------------------------------------------------------------------------------------------------------------------------------------------------------------------------------------------------------------------------------------------|-----------------------------------------------------------------------------------------------------------------------------------------------------------------------------------------------------------------------------------------------------------------------------------------------------------------------------------------------------------------------------------------------------------------------------------------------------------------------------------------------------------------------------------------------------------------------------------------------------------------------------------------------------------------------------------------------------------------------------------------------------------------------------------------------------------------------------------------------------------------------------------------------------------------------------------------------------------------------------------------------------------------------------------------------------------------------------------------------------------------------------------------------------------------------|
|                        |                                                 |                                                                                     |                                                                                             | <p><b>Intervention components:</b><br/> Programme nurses approached all eligible women provided PrEP counselling as part of routine maternal and child health clinic processes. Risk was assessed using a using a risk assessment tool<br/> Women who did not know the HIV status of their partners were offered HIV self-testing kits, if they were willing to test with their partners at home. All women (regardless of risk factors) were informed that PrEP was available if they perceived they were at risk for HIV.</p> | <p>or of unknown HIV status and feeling at risk for acquiring HIV. Reasons for declining PrEP: need to consult partner and low perceived HIV risk Factors associated with initiation: being younger than 24 years, having a partner living with HIV or of unknown HIV status, gestational age less than 26 weeks among pregnant women, having experienced intimate partner violence in the previous 6 months, or sharing needles while engaging in injection drug use, diagnosed or treated for an STI, forced to have sex, and had recurrently used PEP.</p> <ul style="list-style-type: none"> <li>• PrEP continuation: 38.7% of 2030 women returned for PrEP refill at least 1 month after initiation</li> <li>• Factors associated with continuation: women with HIV-positive partners.</li> <li>• Reasons for discontinuation: side effects, no longer perceiving HIV risk, and partner known to be HIV-negative.</li> <li>• PrEP refills: 21.7% of women who initiated PrEP at least 3 months before this evaluation returned for PrEP refill. Of these 242 (54.9%) were younger than 24 years and 199 (45.1%) were aged 24 years or older (p=0.05).</li> </ul> |
| <b>Health facility</b> | Pintye et al. (2019) <sup>29</sup><br><br>Kenya | Conference abstract<br><br>To understand motivations for early PrEP discontinuation | <b>Study population:</b><br>Offered to use PrEP services<br><b>Sample size (total – N):</b> | <b>Nature of Intervention:</b><br>The PrIYA Program provides real world evidence on delivering PrEP to AGYW                                                                                                                                                                                                                                                                                                                                                                                                                     | <ul style="list-style-type: none"> <li>• Interest in initiating PrEP was heavily influenced by one-on-one interactions with a close</li> </ul>                                                                                                                                                                                                                                                                                                                                                                                                                                                                                                                                                                                                                                                                                                                                                                                                                                                                                                                                                                                                                        |

42  
43  
44  
45  
46  
47

|                                    |                                               |                                                                                                                                                                           |                                                                                                                                                                                                                                                                                        |                                                                                                                                                                                                                                                                                                                                                                                                                                                                                                   |                                                                                                                                                                                                                                                                                                                                                                                                                                                                                                                                                                                                                                                                                                |
|------------------------------------|-----------------------------------------------|---------------------------------------------------------------------------------------------------------------------------------------------------------------------------|----------------------------------------------------------------------------------------------------------------------------------------------------------------------------------------------------------------------------------------------------------------------------------------|---------------------------------------------------------------------------------------------------------------------------------------------------------------------------------------------------------------------------------------------------------------------------------------------------------------------------------------------------------------------------------------------------------------------------------------------------------------------------------------------------|------------------------------------------------------------------------------------------------------------------------------------------------------------------------------------------------------------------------------------------------------------------------------------------------------------------------------------------------------------------------------------------------------------------------------------------------------------------------------------------------------------------------------------------------------------------------------------------------------------------------------------------------------------------------------------------------|
|                                    |                                               | among AGYW and Adolescents (PrIYA) Program                                                                                                                                | 69 AGYW<br>69 in-depth interviews: 21 AGYW received, but never used PrEP • 24 discontinued PrEP within 1 month • 24 discontinued PrEP within 3 months<br><b>Gender distribution:</b><br>Females: 100%<br><b>Age distribution:</b><br>Age (years) 22 (20-23)                            | seeking routine ANC, PNC and family planning (FP) services within 16 MCH clinics in Kisumu County, Kenya<br><b>Intervention components:</b><br>N/A<br>AGYW were identified by program nurses and purposively sampled based on 3 categories                                                                                                                                                                                                                                                        | friend, relative, or teacher/professor<br><ul style="list-style-type: none"> <li>• Early PrEP discontinuation patterns were influenced by side effects (feared or experienced) and important life events AGYW frequently stopped PrEP after childbirth and found it challenging to remember to take PrEP during the complex transition to motherhood</li> <li>• AGYW reported that pre-initiation counselling focused on adherence; many were unaware that they could restart PrEP after stopping</li> <li>• Messaging on stopping/restarting PrEP tailored to life events common among AGYW, such as childbirth and periods away from partners, could promote appropriate PrEP use</li> </ul> |
| <b>Health facility<sup>a</sup></b> | Hill et al (2020) <sup>38</sup><br><br>Malawi | Research article<br><br>To understand the level of interest in PrEP among AGYW at highest HIV risk, and the potential role of perceived risk in motivating PrEP interest. | <b>Study population:</b><br>Never been offered to use PrEP services (hypothetical opinions related to PrEP)<br><b>Sample</b><br><b>Sample size (total – N):</b> 825<br><b>Gender distribution:</b> Female: 100%<br><b>Age distribution:</b><br>Median: 20 [18 to 22] (range: 15 to 27) | <b>Nature of Intervention:</b><br>AGYW rated their potential interest in using PrEP after receiving this explanation: "PrEP is a medicine that can be used to prevent HIV for people who are HIV-negative. To be protected with PrEP, a pill is taken every day. These pills contain some of the same medicine used to treat people who already have HIV. PrEP is not currently available in Malawi."<br><b>Intervention components:</b><br>participants were enrolled and followed for one year. | <ul style="list-style-type: none"> <li>• Epidemiologic risk scores were positively associated with PrEP interest, high numbers of AGYW both above and below the high-risk cut-off were very interested in PrEP (68% vs. 63%).</li> <li>• Perceived risk partially explained the relationship between HIV risk and PrEP interest; greater epidemiologic HIV risk was associated with high perceived risk, which was in turn associated with PrEP interest.</li> <li>• Many more high-risk AGYW were interested in PrEP (68%)</li> </ul>                                                                                                                                                         |

|                                                              |                                                                         |                                                                                                                                                     |                                                                                                                                                                                                                                            |                                                                                                                                                                                                                                                                                                                                                        |                                                                                                                                                                                                                                                                                                                                                                                                                                                                                                                                                                             |
|--------------------------------------------------------------|-------------------------------------------------------------------------|-----------------------------------------------------------------------------------------------------------------------------------------------------|--------------------------------------------------------------------------------------------------------------------------------------------------------------------------------------------------------------------------------------------|--------------------------------------------------------------------------------------------------------------------------------------------------------------------------------------------------------------------------------------------------------------------------------------------------------------------------------------------------------|-----------------------------------------------------------------------------------------------------------------------------------------------------------------------------------------------------------------------------------------------------------------------------------------------------------------------------------------------------------------------------------------------------------------------------------------------------------------------------------------------------------------------------------------------------------------------------|
|                                                              |                                                                         |                                                                                                                                                     |                                                                                                                                                                                                                                            | <p><b>NB:</b> PrEP was not provided in this study, nor was it available in government clinics at the time of the study.</p>                                                                                                                                                                                                                            | <p>than expressed a high level of perceived HIV risk (26%).</p> <ul style="list-style-type: none"> <li>• High number of participants with risk scores below the high-risk cut-off who both expressed high perceived risk and interest in PrEP suggesting that demand for PrEP among AGYW may not be well aligned with epidemiologic risk</li> </ul>                                                                                                                                                                                                                         |
| <p><b>Mobile clinic/health facility<sup>c</sup></b></p>      | <p>Travill et al. (2018)<sup>30</sup></p> <p>Kenya and South Africa</p> | <p>Conference abstract</p> <p>To assess PrEP uptake and sexual behaviour in the POWER cohort.</p>                                                   | <p><b>Study population:</b><br/>Offered to use PrEP services</p> <p><b>Sample</b><br/><i>Sample size (total – N):</i> 330<br/><i>Gender distribution:</i> Female: 100%<br/><i>Age distribution:</i> Median age: 20.5 years (IQR:19-22)</p> | <p><b>Nature of Intervention:</b> PrEP was integrated with reproductive health services at family planning clinics (Kisumu, Kenya), an adolescent and youth-friendly clinic (Johannesburg, South Africa [SA]) and a mobile van for reproductive health services for youth (Cape Town, SA)</p> <p><b>Intervention components:</b><br/>PrEP for AGYW</p> | <ul style="list-style-type: none"> <li>• PrEP uptake at the initial visit was 90% across all sites.</li> <li>• Two-thirds (68%) did not know their partners' HIV status and only 4% were in a known sero-discordant relationship.</li> <li>• Main reasons for declining PrEP were fears of HIV stigma or partner reactions</li> <li>• AGYW had evidence of high HIV risk using a risk score, indicating that women initiating PrEP would benefit from it.</li> <li>• AGYW had high willingness to initiate PrEP when delivered in these youth-friendly settings.</li> </ul> |
| <p><b>Hybrid (community-health facility)<sup>c</sup></b></p> | <p>Ong'wen et al. (2018)<sup>28</sup></p> <p>Kenya</p>                  | <p>Conference abstract</p> <p>To know more about adolescent girls accessing routine PrEP services in the context of national scale-up programs.</p> | <p><b>Study population:</b><br/>Offered to use PrEP services</p> <p><b>Sample</b><br/><i>Sample size (total – N):</i> 1851<br/><i>Gender distribution:</i> Females: 100%<br/><i>Age distribution:</i> 15-19 years</p>                      | <p><b>Nature of Intervention:</b><br/>PrEP integration through drop-in centres (DICEs), public and private clinics</p> <p><b>Intervention components:</b><br/>The adolescents received either static or outreach services from 93 Jilinde supported clinics</p>                                                                                        | <ul style="list-style-type: none"> <li>• Among 28,268 clients initiating PrEP, 1851 (6.5%) were adolescent girls</li> <li>• DICEs, clinics designed primarily for sex workers, were the preferred PrEP outlet for adolescent girls, with 66% accessing services in DICEs, 25% accessed PrEP services in public clinics and 9% in private clinics.</li> <li>• Entry to PrEP was through peer educators and networks (50%);</li> </ul>                                                                                                                                        |



|                                                                                                                                                          |                                                                                                                  |                                                                                                                                                                                         |                                                                                                                                                                                                                |                                                                                                                                                                                                                                                                                                                                                            |                                                                                                                                                                                                                                                                                                                                                                                                                                                                                                                                                                                                                                                                                                                                                                                                                          |
|----------------------------------------------------------------------------------------------------------------------------------------------------------|------------------------------------------------------------------------------------------------------------------|-----------------------------------------------------------------------------------------------------------------------------------------------------------------------------------------|----------------------------------------------------------------------------------------------------------------------------------------------------------------------------------------------------------------|------------------------------------------------------------------------------------------------------------------------------------------------------------------------------------------------------------------------------------------------------------------------------------------------------------------------------------------------------------|--------------------------------------------------------------------------------------------------------------------------------------------------------------------------------------------------------------------------------------------------------------------------------------------------------------------------------------------------------------------------------------------------------------------------------------------------------------------------------------------------------------------------------------------------------------------------------------------------------------------------------------------------------------------------------------------------------------------------------------------------------------------------------------------------------------------------|
|                                                                                                                                                          |                                                                                                                  |                                                                                                                                                                                         |                                                                                                                                                                                                                |                                                                                                                                                                                                                                                                                                                                                            | community outreaches (20%); and within health facilities (30%)                                                                                                                                                                                                                                                                                                                                                                                                                                                                                                                                                                                                                                                                                                                                                           |
|                                                                                                                                                          |                                                                                                                  |                                                                                                                                                                                         |                                                                                                                                                                                                                |                                                                                                                                                                                                                                                                                                                                                            | <ul style="list-style-type: none"> <li>• Efforts to make PrEP accessible to AGYW at risk of HIV acquisition should include restructuring the service delivery model</li> </ul>                                                                                                                                                                                                                                                                                                                                                                                                                                                                                                                                                                                                                                           |
| 10<br>11<br>12<br>13<br>14<br>15<br>16<br>17<br>18<br>19<br>20<br>21<br>22<br>23<br>24<br>25<br>26<br>27<br>28<br>29<br>30<br>31<br>32<br>33<br>34<br>35 | <p><b>Mobile clinic<sup>c</sup></b></p> <p>Rousseau et al. (2019)<sup>29</sup></p> <p>South Africa</p>           | <p>Conference abstract</p> <p>Hypothesized that contraceptive use was associated with PrEP uptake and continuation in young women accessing sexual and reproductive health services</p> | <p><b>Study population:</b><br/>Offered to use PrEP services</p> <p><b>Sample</b><br/><i>Sample size (total – N):</i> 1096<br/><i>Gender distribution:</i> Female: 100%<br/><i>Age distribution:</i> 16-25</p> | <p><b>Nature of Intervention:</b><br/>Contraceptive use associated with PrEP uptake and continuation in AGYW accessing sexual and reproductive health services (SRHS) from a mobile clinic</p> <p><b>Intervention components:</b><br/>Sexual reproductive health service including HIV testing, contraception (oral, injectable and implant), and PrEP</p> | <ul style="list-style-type: none"> <li>• Among 1096 AGYW who accessed SRHS 31% initiated PrEP on the same day.</li> <li>• AGYW who were using contraception were significantly more likely to initiate PrEP on the same day compared to those who declined PrEP (76% vs 66% on contraception at that visit; p=0.001).</li> <li>• PrEP initiation was also significantly associated with contraception initiation; contraception was initiated by 44% of AGYW on the same day as PrEP initiation compared to 30% contraception starts in AGYW who declined PrEP (p=0.003).</li> <li>• AGYW's contraception use facilitated PrEP initiation and continuation, PrEP initiation also encouraged young women to initiate contraception use supporting the integration of SRHS with the provision of PrEP for AGYW.</li> </ul> |
| 36<br>37<br>38<br>39<br>40<br>41<br>42<br>43<br>44<br>45<br>46<br>47                                                                                     | <p><b>Research site</b></p> <p>Delany-Moretlwe et al. (2018)<sup>36</sup></p> <p>South Africa &amp; Tanzania</p> | <p>Conference abstract</p> <p>To evaluate whether empowerment clubs increase PrEP uptake and continuation among AGYW.</p>                                                               | <p><b>Study population:</b><br/>Offered to use PrEP services</p> <p><b>Sample</b><br/><i>Sample size (total – N):</i><br/><i>Gender distribution:</i> Female:100%</p>                                          | <p><b>Nature of Intervention:</b><br/>Participants were randomised to standard of care (SoC), which included comprehensive sexual and reproductive health care, with counselling and SMS</p>                                                                                                                                                               | <ul style="list-style-type: none"> <li>• 431 AGYW enrolled and 213 randomised to clubs</li> <li>• 97% initiated PrEP</li> <li>• PrEP continuation did not vary significantly by study arm (p-value =0.31)</li> </ul>                                                                                                                                                                                                                                                                                                                                                                                                                                                                                                                                                                                                     |

|                                           |                                                         |                                                                                                                                                                                                                                     |                                                                                                                                                                                                                                                                                   |                                                                                                                                                                                                                                                                                                                                                                                                                                                                                                                        |                                                                                                                                                                                                                                                                                                                                                                                                                                                                                                                        |
|-------------------------------------------|---------------------------------------------------------|-------------------------------------------------------------------------------------------------------------------------------------------------------------------------------------------------------------------------------------|-----------------------------------------------------------------------------------------------------------------------------------------------------------------------------------------------------------------------------------------------------------------------------------|------------------------------------------------------------------------------------------------------------------------------------------------------------------------------------------------------------------------------------------------------------------------------------------------------------------------------------------------------------------------------------------------------------------------------------------------------------------------------------------------------------------------|------------------------------------------------------------------------------------------------------------------------------------------------------------------------------------------------------------------------------------------------------------------------------------------------------------------------------------------------------------------------------------------------------------------------------------------------------------------------------------------------------------------------|
|                                           |                                                         |                                                                                                                                                                                                                                     | <b>Age distribution:</b><br>Not mentioned                                                                                                                                                                                                                                         | reminders for PrEP users, or to empowerment clubs plus SOC.<br><b>Intervention components:</b><br>Facilitators-led small group sessions and clinic follow-up visits for sexually active AGYW on PrEP                                                                                                                                                                                                                                                                                                                   | <ul style="list-style-type: none"> <li>PrEP continuation was 73% at month 1, 61% at month 3 and 34% at month 6.</li> <li>While PrEP uptake was high in this at-risk population, use diminished with time. Empowerment club participation was low and did not enhance PrEP continuation, contrary to experiences in the HIV treatment field.</li> </ul>                                                                                                                                                                 |
| <b>Research Site</b>                      | Donnell et al. (2021) <sup>37</sup><br><br>South Africa | Research article<br><br>To assess the effect of on-site access to PrEP on HIV incidence.                                                                                                                                            | <b>Study population:</b><br>Offered to use PrEP services<br><b>Sample</b><br><b>Sample size (total – N):</b> 2121<br><b>Gender distribution:</b><br>Female:100%<br><b>Age distribution:</b><br>16-35 years; median age: 23 years (IQR 20-27)                                      | <b>Nature of Intervention:</b><br>On-site PrEP access at nine trial sites provided by research staff<br><b>Intervention components:</b><br>Research nurse provided PrEP                                                                                                                                                                                                                                                                                                                                                | <ul style="list-style-type: none"> <li>After on-site PrEP access began 543 (26%) out of 2124 reported PrEP use.</li> <li>HIV incidence was 2.16% after on-site PrEP access, compared with 4.65% before PrEP access (p=0.0085).</li> <li>Future studies of HIV prevention should incorporate PrEP as part of the standard of prevention</li> </ul>                                                                                                                                                                      |
| <b>Hybrid (community-Health facility)</b> | Were et al (2020) <sup>35</sup><br><br>Kenya            | Research article<br><br>To describe the programmatic application of an oral PrEP cascade; to quantify progression across each step of the cascade for female sex workers (FSW), MSM and AGYW and, to identify missed opportunities. | <b>Study population:</b><br>Offered to use PrEP services<br><b>Sample</b><br><b>Sample size (total – N):</b><br>299,798<br><b>Gender distribution:</b><br>FSW: 211,927, MSM: 47,533 MSM and AGYW: 40,338<br><b>Age distribution:</b><br>AGYW: 15-24; FSW >15 years; MSM:>15 years | <b>Nature of Intervention:</b><br>Scaling up oral PrEP through integration into routine health services in drop-in centres (DICES), public and private health facilities<br><br><b>Intervention components:</b><br>Individuals enter the PrEP pathway through community mobilization. Individuals who are interested in PrEP are referred to facilities providing PrEP, where they undergo HIV testing services. Clients who screen positive for substantial behavioural risk, or who request PrEP, are referred to an | <b>Quantitative:</b> <ul style="list-style-type: none"> <li>Among PrEP-eligible individuals, 2,900 (11%) AGYW, were initiated on PrEP. Of these clients, whereas 55% of AGYW were between 20 and 24 years.</li> <li>Majority (81%) of clients-initiated PrEP through DICES, whereas 14% and 5% were initiated through public and private facilities respectively.</li> <li>PrEP cascade for AGYW aged 15-19 years: HIV- negative (99%), screened (22%), eligible (36%), initiation (95%), month 1 follow-up</li> </ul> |

|  |  |  |                                                                                                                                                                                                                                |                                                                                                                                                                                                                                                                                                                                                                                                                                                                                                                                                                                                                                                                                                                                                                                                                                                                                                                                                                                                                                                                                                                                                                                 |
|--|--|--|--------------------------------------------------------------------------------------------------------------------------------------------------------------------------------------------------------------------------------|---------------------------------------------------------------------------------------------------------------------------------------------------------------------------------------------------------------------------------------------------------------------------------------------------------------------------------------------------------------------------------------------------------------------------------------------------------------------------------------------------------------------------------------------------------------------------------------------------------------------------------------------------------------------------------------------------------------------------------------------------------------------------------------------------------------------------------------------------------------------------------------------------------------------------------------------------------------------------------------------------------------------------------------------------------------------------------------------------------------------------------------------------------------------------------|
|  |  |  | <p>onsite clinician who conducts a clinical assessment and provides PrEP to clients who are eligible and opt-in. Clients are followed-up visit at the same facility one month following initiation and monthly thereafter.</p> | <p>(31%), month 3 follow up (5%)</p> <ul style="list-style-type: none"> <li>• PrEP cascade for AGYW aged 20-24 years: HIV- negative (98%), screened (23%), eligible (34%), initiation (91%), month 1 follow-up (32%), month 3 follow up (5%)</li> <li>• AGYW had higher missed opportunities for screening (78%). Among those screened, a substantially higher proportion of AGYW (65%) were ineligible for PrEP.</li> <li>• Missed opportunities for PrEP initiation was 8% among AGYW.</li> <li>• Majority of AGYW did not persist on PrEP use at month-1 (68%) and month-3 (94%) follow-ups.</li> </ul> <p><b>Qualitative</b></p> <ul style="list-style-type: none"> <li>• Eligibility for PrEP: Poor rapport between AGYW and providers inhibits disclosure of risk behaviours. Peer mobilization and referral of low-risk individuals coupled with inadequate client education on PrEP.</li> <li>• Initiation of PrEP: Myths and misconceptions about PrEP and low risk perception among FSW, MSM and AGYW. Co-location of both PrEP and HIV services in comprehensive care centres (HIV clinics) resulted in PrEP clients feeling stigmatized as HIV positive.</li> </ul> |
|--|--|--|--------------------------------------------------------------------------------------------------------------------------------------------------------------------------------------------------------------------------------|---------------------------------------------------------------------------------------------------------------------------------------------------------------------------------------------------------------------------------------------------------------------------------------------------------------------------------------------------------------------------------------------------------------------------------------------------------------------------------------------------------------------------------------------------------------------------------------------------------------------------------------------------------------------------------------------------------------------------------------------------------------------------------------------------------------------------------------------------------------------------------------------------------------------------------------------------------------------------------------------------------------------------------------------------------------------------------------------------------------------------------------------------------------------------------|

1  
2  
3  
4  
5  
6  
7  
8  
9  
10  
11  
12  
13  
14  
15  
16  
17  
18  
19  
20  
21  
22  
23  
24  
25  
26  
27  
28  
29  
30  
31  
32  
33  
34  
35  
36  
37  
38  
39  
40  
41  
42  
43  
44  
45  
46  
47

1  
2  
3  
4  
5  
6  
7  
8  
9  
10  
11  
12  
13  
14  
15  
16  
17  
18  
19  
20  
21  
22  
23  
24  
25  
26  
27  
28  
29  
30  
31  
32  
33  
34  
35  
36  
37  
38  
39  
40  
41  
42  
43  
44  
45  
46  
47

|                                   |                                                      |                                                                                                                                  |                                                                                                                                                                                                                                                                                        |                                                                                                                                                  |                                                                                                                                                                                                                                                                                                                                                                                                                                                                                                                                                                                                                                                                                                                                                                                                                                                                                  |
|-----------------------------------|------------------------------------------------------|----------------------------------------------------------------------------------------------------------------------------------|----------------------------------------------------------------------------------------------------------------------------------------------------------------------------------------------------------------------------------------------------------------------------------------|--------------------------------------------------------------------------------------------------------------------------------------------------|----------------------------------------------------------------------------------------------------------------------------------------------------------------------------------------------------------------------------------------------------------------------------------------------------------------------------------------------------------------------------------------------------------------------------------------------------------------------------------------------------------------------------------------------------------------------------------------------------------------------------------------------------------------------------------------------------------------------------------------------------------------------------------------------------------------------------------------------------------------------------------|
|                                   |                                                      |                                                                                                                                  |                                                                                                                                                                                                                                                                                        |                                                                                                                                                  | Stigma-related discouragement from peers, family and friends for eligible users. Providers reluctance to prescribe PrEP associated with reluctance to increase provider workload; provider belief that client will not adhere to PrEP. Insensitive referral and access pathways in public and private health facilities.                                                                                                                                                                                                                                                                                                                                                                                                                                                                                                                                                         |
| <b>Studies among Men</b>          |                                                      |                                                                                                                                  |                                                                                                                                                                                                                                                                                        |                                                                                                                                                  |                                                                                                                                                                                                                                                                                                                                                                                                                                                                                                                                                                                                                                                                                                                                                                                                                                                                                  |
| <b>Not specified</b>              | Bell et al. (2019) <sup>25</sup><br><br>South Africa | Conference abstract<br><br>To understand perceptions of PrEP, and barriers and enablers of uptake among young South African men. | <b>Study population:</b> Never been offered to use PrEP services (hypothetical opinions related to PrEP)<br><b>Sample</b><br><i>Sample size (total – N):</i> 2077 (Quantitative: 2019; Qualitative: 58)<br><b>Gender distribution:</b><br>Male: 100%<br><b>Age distribution:</b> 20-34 | <b>Nature of Intervention:</b><br>Perceptions of PrEP use and barriers and enablers of uptake. 58 IDIs<br><b>Intervention components:</b><br>N/A | <ul style="list-style-type: none"> <li>• <b>Enablers to PrEP use:</b> <ul style="list-style-type: none"> <li>- Maintain an HIV-negative status</li> <li>- Avoid conflict and turmoil that HIV diagnosis would bring</li> <li>- High degree of enthusiasm towards the concept</li> </ul> </li> <li>• <b>Barriers to PrEP use:</b> <ul style="list-style-type: none"> <li>- Practical: remembering to take the pill daily, side effects and access to clinics.</li> <li>- Knowledge: Had basic information, confused PrEP with PEP</li> <li>- Psychological: perceived as "only for women" and health seeking behaviour is not the norm for men.</li> <li>- Social: Being seen at clinics by community members, as people will assume that they are HIV positive.</li> <li>- Interpersonal: Keep PrEP use a secret from their partners, friends and family.</li> </ul> </li> </ul> |
| <b>Studies among AGYW and Men</b> |                                                      |                                                                                                                                  |                                                                                                                                                                                                                                                                                        |                                                                                                                                                  |                                                                                                                                                                                                                                                                                                                                                                                                                                                                                                                                                                                                                                                                                                                                                                                                                                                                                  |

|                                                                  |                                                                   |                                                                                                                                                                   |                                                                                                                                                                                                                                                                                                                                                                                                                                                       |                                                                                                                                                                                                                                                                                                                                                                                                                                                                                                                                                            |                                                                                                                                                                                                                                                                                                                                                                                                                                                                                                                                                                                                                                                                                                                                                                                                                                                                                                   |
|------------------------------------------------------------------|-------------------------------------------------------------------|-------------------------------------------------------------------------------------------------------------------------------------------------------------------|-------------------------------------------------------------------------------------------------------------------------------------------------------------------------------------------------------------------------------------------------------------------------------------------------------------------------------------------------------------------------------------------------------------------------------------------------------|------------------------------------------------------------------------------------------------------------------------------------------------------------------------------------------------------------------------------------------------------------------------------------------------------------------------------------------------------------------------------------------------------------------------------------------------------------------------------------------------------------------------------------------------------------|---------------------------------------------------------------------------------------------------------------------------------------------------------------------------------------------------------------------------------------------------------------------------------------------------------------------------------------------------------------------------------------------------------------------------------------------------------------------------------------------------------------------------------------------------------------------------------------------------------------------------------------------------------------------------------------------------------------------------------------------------------------------------------------------------------------------------------------------------------------------------------------------------|
| <p><b>Hybrid (research site-health facility)<sup>e</sup></b></p> | <p>Heffron et al. (2018)<sup>52</sup></p> <p>Kenya and Uganda</p> | <p>Research article</p> <p>To explore fertility intentions, pregnancy, and evaluated the use of PrEP and ART as periconception HIV risk reduction strategies.</p> | <p><b>Study population:</b><br/>Offered to use PrEP services</p> <p><b>Sample</b><br/><i>Sample size (total – N):</i> 1013<br/><i>Gender distribution:</i><br/>HIV-infected females: 455; HIV-uninfected males: 224; HIV infected males: 110; HIV-uninfected females: 224<br/><i>Age distribution:</i><br/>HIV-infected females: 26 (22-30); HIV-uninfected males: 30 (26-37); HIV-uninfected females: 29 (24-35); HIV-infected males: 35 (30-42)</p> | <p><b>Nature of Intervention:</b><br/>The PrEP delivery model integrated PrEP into HIV treatment services. PrEP discontinuation was encouraged once the HIV-infected partner had used ART for at least 6 months (time to achieve HIV viral suppression).</p> <p><b>Intervention components:</b><br/>Couples-based HIV prevention counselling; safer conception counselling or contraceptives; counselling and HIV testing for HIV-uninfected partner; PrEP initiation/prescription and adherence counselling; referral of HIV infected partner for ART</p> | <ul style="list-style-type: none"> <li>• Uptake and adherence to integrated PrEP and ART strategy was high with an estimated 96% reduction in HIV incidence.</li> <li>• During the 6 months preceding pregnancy, 82.9% of couples used PrEP or ART and there were no HIV seroconversions, 14.5% used some ART and/or PrEP and 2.6% used neither PrEP nor ART.</li> <li>• Among the 81 couples who were using ART only (61 couples with HIV-infected women and 20 with HIV-infected men), 91.2% of the HIV-uninfected partners had discontinued PrEP due to sustained (i.e., [6 months] ART use by their HIV infected partner.</li> <li>• Integrated PrEP and ART was readily used by HIV serodiscordant couples.</li> <li>• Widespread scale-up of safer conception counselling and services is warranted to respond to strong desires for pregnancy among HIV-affected men and women.</li> </ul> |
| <p><b>Hybrid (research site-health facility)<sup>e</sup></b></p> | <p>Ngure et al. (2016)<sup>45</sup></p> <p>Kenya</p>              | <p>Research article</p> <p>To gather insights into couples' decision-making, motivations for PrEP uptake, and experiences soon after PrEP initiation.</p>         | <p><b>Study population:</b><br/>Offered to use PrEP services</p> <p><b>Sample</b><br/><i>Sample size (total – N):</i> 40<br/><i>Gender distribution:</i> Female: 20; Male:20<br/><i>Age distribution:</i> Females: 29.1 (20-43), Males: 36.6 (27-57)</p>                                                                                                                                                                                              | <p><b>Nature of Intervention:</b> The PrEP delivery model integrated PrEP into HIV treatment services. PrEP discontinuation was encouraged once the HIV-infected partner had used ART for at least 6 months (time to achieve HIV viral suppression).</p>                                                                                                                                                                                                                                                                                                   | <ul style="list-style-type: none"> <li>• PrEP offered couples an additional strategy to reduce the risk of HIV transmission, meet their fertility desires, and cope with HIV serodiscordance.</li> <li>• Remaining HIV-negative at follow-up visits reinforced couples' decisions and</li> </ul>                                                                                                                                                                                                                                                                                                                                                                                                                                                                                                                                                                                                  |

|                                                              |                                                                |                                                                                                                                                                                          |                                                                                                                                                                                                                                                                                                       |                                                                                                                                                                                                                                                                                                                                                                                                                                                                                                                                                                                |                                                                                                                                                                                                                                                                                                                                                                                                                                                                                                                                                                                                                                                                                                                                                                                 |
|--------------------------------------------------------------|----------------------------------------------------------------|------------------------------------------------------------------------------------------------------------------------------------------------------------------------------------------|-------------------------------------------------------------------------------------------------------------------------------------------------------------------------------------------------------------------------------------------------------------------------------------------------------|--------------------------------------------------------------------------------------------------------------------------------------------------------------------------------------------------------------------------------------------------------------------------------------------------------------------------------------------------------------------------------------------------------------------------------------------------------------------------------------------------------------------------------------------------------------------------------|---------------------------------------------------------------------------------------------------------------------------------------------------------------------------------------------------------------------------------------------------------------------------------------------------------------------------------------------------------------------------------------------------------------------------------------------------------------------------------------------------------------------------------------------------------------------------------------------------------------------------------------------------------------------------------------------------------------------------------------------------------------------------------|
|                                                              |                                                                |                                                                                                                                                                                          |                                                                                                                                                                                                                                                                                                       | <p><b>Intervention components:</b> At the time of interview: time since initiating PrEP was 6.3 months and time since initiating ART was 5.6 months</p>                                                                                                                                                                                                                                                                                                                                                                                                                        | <p>motivated continued adherence to PrEP. Daily PrEP use supported the HIV-infected partners adherence to ART.</p> <ul style="list-style-type: none"> <li>• A positive clinical encounter (provider's advice and client-friendly services) motivated initiation and continuation of PrEP</li> </ul>                                                                                                                                                                                                                                                                                                                                                                                                                                                                             |
| <p><b>Hybrid (community-health facility)<sup>d</sup></b></p> | <p>Koss et al. (2018)<sup>41</sup></p> <p>Kenya and Uganda</p> | <p>Research article</p> <p>To report on "early adopters" of PrEP in the Sustainable East Africa Research in Community Health (SEARCH) study in rural Uganda and Kenya. intervention.</p> | <p><b>Study population:</b><br/>Offered to use PrEP services</p> <p><b>Sample</b></p> <p><b>Population:</b><br/>AGYW Men</p> <p><b>Sample size (total – N):</b><br/>4064</p> <p><b>Gender distribution:</b><br/>1934 females 2130 males<br/>48% females 52% males</p> <p><b>Age distribution:</b></p> | <p><b>Nature of Intervention:</b><br/>PrEP education and discussions occurred on arrival at the health campaign, with HIV counsellors and clinicians. During home-based testing, 1 staff member conducted HIV testing and counselling and provided info about PrEP.</p> <p><b>Intervention components:</b><br/>1-month community mobilization and sensitization activities on PrEP. PrEP risk score or was administered. Hybrid HIV and multi-disease testing was conducted (health campaigns &amp; home-based) with counselling and health education discussions on PrEP.</p> | <ul style="list-style-type: none"> <li>• Of 21 212 HIV-uninfected adults, 4064 were identified for PrEP (2991 by empiric risk score, 1073 by self-identified risk).</li> <li>• 739 individuals started PrEP within 30 days; 77% on the same day.</li> <li>• Among adults identified by risk score, predictors of early adoption included male sex (adjusted odds ratio 1.53; 95% confidence interval, 1.09-2.15), polygamy (1.92; 1.27-2.90), serodiscordant spouse (3.89; 1.18-12.76), self-perceived HIV risk (1.66; 1.28-2.14), and testing at health campaign versus home (5.24; 3.33-8.26).</li> <li>• Among individuals who self-identified for PrEP, predictors of early adoption included older age (2.30; 1.29-4.08) and serodiscordance (2.61; 1.01-6.76).</li> </ul> |
| <p><b>Hybrid (community-</b></p>                             | <p>Koss et al. (2020)<sup>43</sup></p>                         | <p>Research article</p> <p>To assess PrEP uptake and engagement after population-</p>                                                                                                    | <p><b>Study population:</b><br/>Offered to use PrEP services</p> <p><b>Sample</b></p>                                                                                                                                                                                                                 | <p><b>Nature of Intervention:</b><br/>Population-level HIV and multi-disease testing using a hybrid mobile testing approach</p>                                                                                                                                                                                                                                                                                                                                                                                                                                                | <ul style="list-style-type: none"> <li>• In 12935 (10% serodifferent partnership, 54% risk score, 36% self-identified risk) people</li> </ul>                                                                                                                                                                                                                                                                                                                                                                                                                                                                                                                                                                                                                                   |

|                                                       |                                                         |                                                                                                                                                                           |                                                                                                                                                                                                                                                                                                                               |                                                                                                                                                                                                                                                                                                                                                                                                                                                                                                                                                                                                                                                                                                                                                                                                                                                                                                                                                |                                                                                                                                                                                                                                                                                                                                                                                                                                                                                                                                                                                                                                                                                                                                                                                                                                                                                   |
|-------------------------------------------------------|---------------------------------------------------------|---------------------------------------------------------------------------------------------------------------------------------------------------------------------------|-------------------------------------------------------------------------------------------------------------------------------------------------------------------------------------------------------------------------------------------------------------------------------------------------------------------------------|------------------------------------------------------------------------------------------------------------------------------------------------------------------------------------------------------------------------------------------------------------------------------------------------------------------------------------------------------------------------------------------------------------------------------------------------------------------------------------------------------------------------------------------------------------------------------------------------------------------------------------------------------------------------------------------------------------------------------------------------------------------------------------------------------------------------------------------------------------------------------------------------------------------------------------------------|-----------------------------------------------------------------------------------------------------------------------------------------------------------------------------------------------------------------------------------------------------------------------------------------------------------------------------------------------------------------------------------------------------------------------------------------------------------------------------------------------------------------------------------------------------------------------------------------------------------------------------------------------------------------------------------------------------------------------------------------------------------------------------------------------------------------------------------------------------------------------------------|
| <p>health facility)<sup>d</sup></p>                   | <p>Kenya and Uganda</p>                                 | <p>level HIV testing and universal PrEP access to characterise gaps in the PrEP cascade</p>                                                                               | <p><b>Sample size (total – N):</b> 12935 (HIV-negative with elevated risk)<br/> <b>Gender distribution:</b><br/>         Female: 6459;<br/>         Male: 6476<br/> <b>Age distribution:</b><br/>         15-24: 4800;<br/>         25-34: 4712;<br/>         35-44: 1927;<br/>         45-54: 991;<br/>         ≥55: 505</p> | <p>at community health fairs, home-based testing or facilities. PrEP initiation at health fairs or at local clinic.<br/> <b>Intervention components:</b><br/> <i>Community:</i> community sensitisation, HIV testing, PrEP counselling to HIV- negative people at elevated risk (serodifferent partnership, risk score, or self-identified risk); on-site PrEP start at health fairs or same-day PrEP initiation at local clinics. <i>Home:</i> home-based testing and PrEP counselling, offer of PrEP through local clinics.<br/> <i>Local clinic:</i> Patients with HIV were asked to bring their HIV-negative or partners with unknown HIV status to the clinic for HIV testing and the offer of PrEP initiation.<br/> <i>Follow up:</i> visits included supportive delivery system with options for visits at clinic, home, or community locations. Follow up visits included: HCT, PrEP refill blood tests and adherence measurements</p> | <p>at elevated risk, 27% initiated PrEP.</p> <ul style="list-style-type: none"> <li>• 82% initiated PrEP on the same day as HIV testing, 50% of whom were men</li> <li>• 19% of AGYW (15-24 years) initiated PrEP</li> <li>• PrEP uptake was lower among individuals aged 15-24 years and mobile individuals.</li> <li>• At week 4, 64% were engaged in the programme, 49% received medication refills, and 40% self-reported adherence.</li> <li>• At week 72, 56% were engaged, 33% received a refill, and 27% self-reported adherence.</li> <li>• Inclusive risk assessment (combining serodifferent partnership, an empirical risk score, and self-identification of HIV risk) was feasible and identified individuals who could benefit from PrEP.</li> <li>• The biggest gap in the PrEP cascade was PrEP uptake, particularly for young and mobile individuals.</li> </ul> |
| <p>Hybrid (community-health facility)<sup>d</sup></p> | <p>Mayer et al. (2019)<sup>42</sup><br/><br/>Uganda</p> | <p>Research article<br/><br/>To estimate the association between distance to clinic and other transportation-related barriers on PrEP uptake and initial clinic visit</p> | <p><b>Study population:</b><br/>Offered to use PrEP services<br/> <b>Sample</b><br/> <b>Sample size (total – N):</b> 701<br/> <b>Gender distribution:</b><br/>         Female: 300;<br/>         Male: 401<br/> <b>Age distribution:</b><br/>         15-24: 339;<br/>         25-34: 242;</p>                                | <p><b>Nature of Intervention:</b> PrEP was given using a hybrid model and initiation was dependent on participant choice. PrEP could be initiated same day on-site at community health fairs or at local clinic). For those tested at home PrEP was offered within one to six months following the</p>                                                                                                                                                                                                                                                                                                                                                                                                                                                                                                                                                                                                                                         | <ul style="list-style-type: none"> <li>• Of the 701 PrEP-eligible participants, 39% started PrEP within four weeks; of these, 17% were retained at four weeks.</li> <li>• Participants with a distance to clinic of ≥2 km were less likely to start PrEP (p = 0.012) and</li> </ul>                                                                                                                                                                                                                                                                                                                                                                                                                                                                                                                                                                                               |

|                                                               |                                                                    |                                                                                                                                                                                                                                              |                                                                                                                                                                                                                                                |                                                                                                                                                                                                                                                                                                                                                                                                                                                                                                                                                                                                 |                                                                                                                                                                                                                                                                                                                                                                                                                                                                                                                                                                                                                         |
|---------------------------------------------------------------|--------------------------------------------------------------------|----------------------------------------------------------------------------------------------------------------------------------------------------------------------------------------------------------------------------------------------|------------------------------------------------------------------------------------------------------------------------------------------------------------------------------------------------------------------------------------------------|-------------------------------------------------------------------------------------------------------------------------------------------------------------------------------------------------------------------------------------------------------------------------------------------------------------------------------------------------------------------------------------------------------------------------------------------------------------------------------------------------------------------------------------------------------------------------------------------------|-------------------------------------------------------------------------------------------------------------------------------------------------------------------------------------------------------------------------------------------------------------------------------------------------------------------------------------------------------------------------------------------------------------------------------------------------------------------------------------------------------------------------------------------------------------------------------------------------------------------------|
|                                                               |                                                                    |                                                                                                                                                                                                                                              | <p>35-44:77;<br/>45-54: 991;<br/>≥45: 43</p>                                                                                                                                                                                                   | <p>community campaign through local clinics.<br/><b>Intervention components:</b> Meetings with community stakeholders to sensitise them on PrEP, at community health campaigns (CHCs), eligible HIV-negative participants at elevated risk (serodifferent partnership, risk score, or self-identified risk) were directed to a PrEP education station where they were informed about how PrEP works, interested participants were offered referral to a linkage station to make an appointment at clinic for PrEP enrolment or same-day PrEP start or a clinic appointment at a later date.</p> | <p>less likely to be retained on PrEP once initiated (<math>p = 0.024</math>)</p> <ul style="list-style-type: none"> <li>• Eligible participants (from home-based testing) who did not have the option of same-day PrEP initiation were also less likely to initiate PrEP (<math>p &lt; 0.001</math>).</li> <li>• Barriers to PrEP use: daily use of PrEP, "low/no risk of getting HIV, transportation-related barriers (clinic is too far away and travel away from home).</li> </ul>                                                                                                                                  |
| <p><b>Hybrid (community-health facility) <sup>d</sup></b></p> | <p>Camlin et al. (2020)<sup>44</sup><br/><br/>Kenya and Uganda</p> | <p>Research article<br/><br/>To explore understandings of PrEP, elucidate factors influential of demand, decisions around PrEP uptake or non-initiation, and adherence and discontinuation in population subgroups at elevated HIV risk.</p> | <p><b>Study population:</b> Offered to use PrEP services<br/><b>Sample</b><br/><b>Sample size (total – N):</b> 111<br/><b>Gender distribution:</b> Females: 65; Males: 46<br/><b>Age distribution:</b> 15-35, median age: 24 (range 17-35)</p> | <p><b>Nature of Intervention:</b> Same day PrEP initiation on-site at community health campaigns or at health facilities. 8 FGDs (4 male, 4 female groups) each with 8-12 participants; 13 IDIs with PrEP initiators and 10 IDIs with PrEP decliners<br/><b>Intervention components:</b> As per SEARCH study: Same day initiation of PrEP on-site at community health campaigns or health facilities. Transport to clinics for the PrEP initiation visit. Follow-up visits which occurred at local health facilities, participants' homes, or other community-based</p>                         | <ul style="list-style-type: none"> <li>• Gendered motivations for PrEP: young men viewed PrEP as a means to safely pursue multiple partners, while young women saw PrEP as a means to control risks in terms of engagement in transactional sex and difficulty in negotiating condom use and partner testing.</li> <li>• Uptake was hindered by HIV/ART-related stigma (colour of pill same as ART, accessing PrEP at the same facility where HIV care was provided), the need for partners permission, distance to facilities, mixed messaging on the dosing of PrEP, taking daily medications, living with</li> </ul> |



|                                                              |                                                                |                                                                                                                                                                |                                                                                                                                                                                                                                                                                                                                                                                                                                                                                                     |                                                                                                                                                                                                     |                                                                                                                                                                                                                                                                                                                                                                                                                                                                                                                                                                                                                                                                                                                                                                                             |
|--------------------------------------------------------------|----------------------------------------------------------------|----------------------------------------------------------------------------------------------------------------------------------------------------------------|-----------------------------------------------------------------------------------------------------------------------------------------------------------------------------------------------------------------------------------------------------------------------------------------------------------------------------------------------------------------------------------------------------------------------------------------------------------------------------------------------------|-----------------------------------------------------------------------------------------------------------------------------------------------------------------------------------------------------|---------------------------------------------------------------------------------------------------------------------------------------------------------------------------------------------------------------------------------------------------------------------------------------------------------------------------------------------------------------------------------------------------------------------------------------------------------------------------------------------------------------------------------------------------------------------------------------------------------------------------------------------------------------------------------------------------------------------------------------------------------------------------------------------|
|                                                              |                                                                |                                                                                                                                                                |                                                                                                                                                                                                                                                                                                                                                                                                                                                                                                     | locations of the participant's choice.                                                                                                                                                              | <p>parents or were attending school, moral prohibitions against sex among young people, desire for “proof” of efficacy by peers</p> <ul style="list-style-type: none"> <li>• Uptake was motivated by high perceived HIV risk, and beliefs that PrEP use supported life goals (completing schooling or having a family).</li> <li>• Discontinuation of PrEP was due to dissolution of partnerships/changing risk, unsupportive partners/peers, or early side effects/pill burden.</li> </ul>                                                                                                                                                                                                                                                                                                 |
| <p><b>Hybrid (community-health facility)<sup>d</sup></b></p> | <p>Koss et al. (2017)<sup>26</sup></p> <p>Kenya and Uganda</p> | <p>Conference abstract</p> <p>To evaluate barriers to the uptake of open-label PrEP offered in a population-based context in high HIV prevalence settings.</p> | <p><b>Study population:</b><br/>Offered to use PrEP services (nested in SEARCH Trial)</p> <p><b>Sample</b></p> <p><b>Population:</b><br/>Men. Women and youth</p> <p><b>Sample size (total – N):</b><br/>63 Community members: 40% men; 35% women; 25% youth 42 Clients who did not initiate PrEP: 38% women; 45% at risk for HIV by empiric score</p> <p><b>Gender distribution:</b><br/>16-53 years, median age of 28 years</p> <p><b>Age distribution:</b><br/>40% men, 35% women, 25% youth</p> | <p><b>Nature of Intervention:</b><br/>This is a cross sectional study based on SEARCH trial</p> <p><b>Intervention components:</b><br/>n/a</p> <p><b>Intervention delivery setting:</b><br/>n/a</p> | <ul style="list-style-type: none"> <li>- In communities that were offered targeted PrEP in this population-based study, multi-level barriers to the uptake of PrEP were identified.</li> <li>- In addition to barriers identified in prior studies of targeted populations, such as aspects of pill-taking, concerns about effectiveness, and partner and household---level influence, concerns about access to PrEP via health facilities or at school, opportunity costs, mobility, and misconceptions about PrEP as barriers to uptake in SEARCH communities.</li> <li>• Strategies are needed to address these barriers, such as community sensitization, expanded provision of information on PrEP, and community---based delivery mechanisms to facilitate access to PrEP.</li> </ul> |

|                                                                                                                                                                                                                                                |                                                         |                                                                                                                                                                                                                                                                         |                                                                                                                                                                                                                                                                                                                                                                  |                                                                                                                                                                                                                                                                                                                                                                  |                                                                                                                                                                                                                                                                                                                                                                                                                                                                                                                                                                                                                                                                                                                                                                                                                                                                |
|------------------------------------------------------------------------------------------------------------------------------------------------------------------------------------------------------------------------------------------------|---------------------------------------------------------|-------------------------------------------------------------------------------------------------------------------------------------------------------------------------------------------------------------------------------------------------------------------------|------------------------------------------------------------------------------------------------------------------------------------------------------------------------------------------------------------------------------------------------------------------------------------------------------------------------------------------------------------------|------------------------------------------------------------------------------------------------------------------------------------------------------------------------------------------------------------------------------------------------------------------------------------------------------------------------------------------------------------------|----------------------------------------------------------------------------------------------------------------------------------------------------------------------------------------------------------------------------------------------------------------------------------------------------------------------------------------------------------------------------------------------------------------------------------------------------------------------------------------------------------------------------------------------------------------------------------------------------------------------------------------------------------------------------------------------------------------------------------------------------------------------------------------------------------------------------------------------------------------|
| <p>1<br/>2<br/>3<br/>4<br/>5<br/>6<br/>7<br/>8<br/>9<br/>10<br/>11<br/>12<br/>13<br/>14<br/>15<br/>16<br/>17<br/>18<br/>19<br/>20<br/>21<br/>22<br/>23<br/>24<br/>25<br/>26<br/>27<br/>28</p> <p><b>Hybrid (community-health facility)</b></p> | <p>Gombe et al. (2020)<sup>46</sup></p> <p>Zimbabwe</p> | <p>Research article</p> <p>To understand the factors that motivate clients to accept, decline, continue, or discontinue PrEP.</p>                                                                                                                                       | <p><b>Study population:</b><br/>Offered to use PrEP services</p> <p><b>Sample</b><br/><i>Sample size (total – N):</i> 60<br/><i>Gender distribution:</i> Female: 46; Male: 14<br/><i>Age distribution:</i> 16-25: 20%; 26-40: 60%; &gt;41: 20%</p>                                                                                                               | <p><b>Nature of Intervention:</b> PrEP was integrated at two family planning clinics. 54 IDIs with PrEP acceptors and 6 IDIs with PrEP decliners</p> <p><b>Intervention components:</b><br/>HIV testing; screening for PrEP eligibility according to a tool; same day initiation of PrEP (one-month supply); follow-up visit at month 1 (three-month supply)</p> | <ul style="list-style-type: none"> <li>• Motivators to accept PrEP: High HIV risk perception, preference for PrEP over other HIV prevention methods, perceived severity of living with HIV, confidence in PrEP</li> <li>• Barriers to accepting PrEP: fear of pill burden or impact of pills, wanting partners consent or fearing partner reaction to PrEP, feeling satisfied with current method of HIV prevention</li> <li>• Motivators to continue PrEP: focus on original motivation, establishing daily pill routine, accessible PrEP pill storage, planning ahead before travelling out of town, partner or facility support</li> <li>- Barriers to continuing PrEP: being unaccustomed to taking pills, religious issues, travel out of town, clinic schedule/hours, lack of transport funds, misunderstanding dosing guidance, side effects</li> </ul> |
| <p>29<br/>30<br/>31<br/>32<br/>33<br/>34<br/>35<br/>36<br/>37<br/>38<br/>39<br/>40<br/>41<br/>42<br/>43<br/>44<br/>45<br/>46<br/>47</p> <p><b>Health facility</b></p>                                                                          | <p>Sack et al (2020)<sup>55</sup></p> <p>Mozambique</p> | <p>Research article</p> <p>To explore the perspectives, attitudes, and experiences of HIV serodiscordant partners taking PrEP and develop a messaging campaign to improve PrEP uptake in rural Mozambique to reduce HIV transmission among serodiscordant partners.</p> | <p><b>Study population:</b><br/>Offered to use PrEP services</p> <p><b>Sample</b><br/><i>Sample size (total – N):</i> 20<br/><i>Gender distribution:</i> Female: 11; Male: 9<br/><i>Age distribution:</i> Median age 35, interquartile range 26.5-37.5). Female: median age 32, interquartile range 25.5-36; male: median age 36, interquartile range 31-38.</p> | <p><b>Nature of Intervention:</b> Stories will be presented to discordant couples to try to improve PrEP uptake and reduce incident HIV infections.</p> <p><b>Intervention components:</b><br/>Three oral stories designed to educate, empower, and normalize PrEP use.</p>                                                                                      | <ul style="list-style-type: none"> <li>• Individual factors influencing PrEP uptake and adherence: love for one's partner, knowledge about PrEP and the belief it is effective, fear of HIV and PrEP stigma</li> <li>• Interpersonal factors affecting PrEP uptake: desire to protect family, partner support and relationship strength, Overcoming the fear of stigma</li> </ul>                                                                                                                                                                                                                                                                                                                                                                                                                                                                              |

|                  |                                                         |                                                                                                                                              |                                                                                                                                                                                                                                                                                                                                                                                                                                                                                                                                                                                                   |                                                                                                                                 |                                                                                                                                                                                                                                                                                                                                                                                                                                                                                                                                                                                                                   |
|------------------|---------------------------------------------------------|----------------------------------------------------------------------------------------------------------------------------------------------|---------------------------------------------------------------------------------------------------------------------------------------------------------------------------------------------------------------------------------------------------------------------------------------------------------------------------------------------------------------------------------------------------------------------------------------------------------------------------------------------------------------------------------------------------------------------------------------------------|---------------------------------------------------------------------------------------------------------------------------------|-------------------------------------------------------------------------------------------------------------------------------------------------------------------------------------------------------------------------------------------------------------------------------------------------------------------------------------------------------------------------------------------------------------------------------------------------------------------------------------------------------------------------------------------------------------------------------------------------------------------|
|                  |                                                         |                                                                                                                                              |                                                                                                                                                                                                                                                                                                                                                                                                                                                                                                                                                                                                   |                                                                                                                                 | to seek support from family and friends                                                                                                                                                                                                                                                                                                                                                                                                                                                                                                                                                                           |
| <b>Community</b> | Bassett et al. (2018) <sup>48</sup><br><br>South Africa | Research article<br><br>To assess the acceptability and feasibility of offering family planning and HIV prevention services at salons.       | <b>Study population:</b><br>Never been offered to use PrEP services (hypothetical opinions related to PrEP)<br><b>Sample</b><br><b>Population:</b><br>17 hair salons, 92 stylists, 326 clients<br><b>Sample size (total – N):</b><br>Salons (N = 17), Owners (N = 17), Stylists (N = 92), Female clients (N = 326)<br><b>Gender distribution:</b><br>100% of salon clients were female 82% of stylists were female 65% of owners were female<br><b>Age distribution:</b><br>Median age (IQR): Salon clients: 28 (IQR 24 to 33); Stylists: 29 (26-32) Owners: 36 (33-43)                           | <b>Nature of Intervention:</b><br>n/a<br><b>Intervention components:</b><br>n/a<br><b>Intervention delivery setting:</b><br>n/a | <ul style="list-style-type: none"> <li>Overall, most owners, stylists, and clients were willing to receive contraception and PrEP from a nurse in hair salons in and around Umlazi Township.</li> <li>Frequent client visits and willingness of stylists to offer health education suggest that a stylist initiated, nurse-supported health intervention could be feasible in the salon setting.</li> <li>Hair salons represent a promising venue for reaching young women in sub-Saharan Africa at risk of unintended pregnancy and HIV infection.</li> </ul>                                                    |
| <b>Community</b> | Bassett et al. (2019) <sup>47</sup><br><br>South Africa | Research article<br><br>To assess the acceptability of nurse-offered contraceptive and PrEP services at hair salons in Durban, South Africa. | <b>Study population:</b><br>Never been offered to use PrEP services (hypothetical opinions related to PrEP)<br><b>Sample</b><br><b>Population:</b><br>Clients of hair salons-Females, mean age 27 years, hair salon owners, hair stylists<br><b>Sample size (total – N):</b><br>Clients=42 (all female) Stylists=43 (40 female; 3 male) Salon owners=10 (8 female; 2 male)<br><b>Gender distribution:</b><br>Clients: 42 Females Stylists: 40 Females; 3 Males Owners: 8 Females; 2 Males<br><b>Age distribution:</b><br>Clients: M=27.1; SD=6.3 Stylists: M=29.6; SD=5.1 Owners: M=40.3; SD; 7.6 | <b>Nature of Intervention:</b><br>n/a<br><b>Intervention components:</b><br>n/a<br><b>Intervention delivery setting:</b><br>n/a | <ul style="list-style-type: none"> <li>Participants felt that incentives would be beneficial to program enrolment, if not necessary, to garner interest among clients. One client noted that incentives have become an expected part of research</li> <li>Overall, participants liked the idea of receiving personal SMS messages and having WhatsApp groups as adherence supports. Clients preferred SMS messages for direct adherence motivation because they are more private.</li> <li>One client felt that an SMS could also serve as an automated daily reminder for women on PrEP to take their</li> </ul> |

1  
2  
3  
4  
5  
6  
7  
8  
9  
10  
11  
12  
13  
14  
15  
16  
17  
18  
19  
20  
21  
22  
23  
24  
25  
26  
27  
28  
29  
30  
31  
32  
33  
34  
35  
36  
37  
38  
39  
40  
41  
42  
43  
44  
45  
46  
47

|                  |                                                   |                                                                                                                                         |                                                                                                                                                                                                                                                                                                                                                                                                                                                                                                                                                                                                 |                                                                                                      |                                                                                                                                                                                                                                                                                                                                                                                                                                                                                                                                                                                                                                                                                 |
|------------------|---------------------------------------------------|-----------------------------------------------------------------------------------------------------------------------------------------|-------------------------------------------------------------------------------------------------------------------------------------------------------------------------------------------------------------------------------------------------------------------------------------------------------------------------------------------------------------------------------------------------------------------------------------------------------------------------------------------------------------------------------------------------------------------------------------------------|------------------------------------------------------------------------------------------------------|---------------------------------------------------------------------------------------------------------------------------------------------------------------------------------------------------------------------------------------------------------------------------------------------------------------------------------------------------------------------------------------------------------------------------------------------------------------------------------------------------------------------------------------------------------------------------------------------------------------------------------------------------------------------------------|
|                  |                                                   |                                                                                                                                         |                                                                                                                                                                                                                                                                                                                                                                                                                                                                                                                                                                                                 |                                                                                                      | <p>medication. A few participants also noted that SMS would be more accessible than WhatsApp given data constraints.</p> <ul style="list-style-type: none"> <li>• Overall, participants were enthusiastic about the program. Convenience and a conducive environment were noted as facilitators to receiving health services in the hair salon; attention will have to be directed to establishing privacy and program legitimacy.</li> <li>• Hair salons represent an innovative venue for reaching young women at high-risk for unintended pregnancy and HIV infection.</li> </ul>                                                                                            |
| <b>Community</b> | Lubwama et al. (2019) <sup>49</sup><br><br>Uganda | Conference abstract<br><br>A review of PrEP data from PEPFAR Data for Transparency Impact Monitoring (DATIM) for July 2017 to June 2018 | <p><b>Study population:</b><br/>Offered to use PrEP services</p> <p><b>Sample</b><br/><i>Population:</i> Key populations including sex workers (SW), men who have sex with men (MSM), transgender persons (TG) and other high-risk groups (fisher folk [FF], discordant couples [DC], truckers, adolescent girls and young women [AGYW] and people who inject drugs).</p> <p><i>Sample size (total – N):</i><br/>Initiated PrEP (6 sites) 3,846<br/>PrEP clients (1 community): 1538</p> <p><i>Gender distribution:</i><br/>Not mentioned</p> <p><i>Age distribution:</i><br/>Not mentioned</p> | <p><b>Intervention components:</b><br/>Drop-in centres (DINCs), Community based outreach centres</p> | <ul style="list-style-type: none"> <li>• 3,846 individuals-initiated PrEP; 2,568 (67.2%) SW, 327 (8.5%) MSM, 15 (0.4%) TG, and 918 (23.8%) other high-risk groups</li> <li>• One community had 1538 PrEP clients: 58.1% SW, 25.4% FF, 7.4% DC and 0.5% MSM.</li> <li>• Return rates for PrEP were higher among DC (3 months:56.9%, 6 months:46.8%) and low among SW (3 months 37.5%, 6 months 26.3%) and FF (3months 16.4%, 6months 14.2%).</li> <li>• The majority (69.2%, 1064/1538) were reached through outreach models versus fixed public health facilities</li> <li>• More SW than other KP and high-risk groups were reached with PrEP. Retention at 3 and 6</li> </ul> |

|                      |                                                        |                                                                                                                                                                                             |                                                                                                                                                                                                                                                                                                                                                                                                                                                                                                                                                                                                                                                       |                                                                                                                                                                                                                                                                                                                                                                                                                                                                                                                                                                                                                                   |                                                                                                                                                                                                                                                                                                                                                                                                                                                                                                                                                                                                                                            |
|----------------------|--------------------------------------------------------|---------------------------------------------------------------------------------------------------------------------------------------------------------------------------------------------|-------------------------------------------------------------------------------------------------------------------------------------------------------------------------------------------------------------------------------------------------------------------------------------------------------------------------------------------------------------------------------------------------------------------------------------------------------------------------------------------------------------------------------------------------------------------------------------------------------------------------------------------------------|-----------------------------------------------------------------------------------------------------------------------------------------------------------------------------------------------------------------------------------------------------------------------------------------------------------------------------------------------------------------------------------------------------------------------------------------------------------------------------------------------------------------------------------------------------------------------------------------------------------------------------------|--------------------------------------------------------------------------------------------------------------------------------------------------------------------------------------------------------------------------------------------------------------------------------------------------------------------------------------------------------------------------------------------------------------------------------------------------------------------------------------------------------------------------------------------------------------------------------------------------------------------------------------------|
|                      |                                                        |                                                                                                                                                                                             |                                                                                                                                                                                                                                                                                                                                                                                                                                                                                                                                                                                                                                                       |                                                                                                                                                                                                                                                                                                                                                                                                                                                                                                                                                                                                                                   | <p>months was low for sex workers and fisherfolk, somewhat higher for discordant couples.</p> <ul style="list-style-type: none"> <li>• Outreach approaches should be scaled up to reach more KP clients with PrEP. Retention strategies should be strengthened, especially for sex workers and fisherfolk, who may be highly mobile.</li> </ul>                                                                                                                                                                                                                                                                                            |
| <b>Community</b>     | Morton et al (2020) <sup>53</sup><br><br>South Africa  | <p>Research article</p> <p>To understand how to effectively create awareness, stimulate interest, and increase uptake of PrEP.</p>                                                          | <p><b>Study population:</b><br/>Never been offered to use PrEP services (hypothetical opinions related to PrEP)</p> <p><b>Sample</b><br/><b>Sample size (total – N):</b> 385<br/>Quantitative: 320<br/>Qualitative: 28 key stakeholders; 11 PrEP-naïve young, 10 PrEP-experienced women, five older women living with HIV, four men, seven key informants</p> <p><b>Gender distribution:</b><br/>Female 100% in household surveys</p> <p><b>Age distribution:</b><br/>Quantitative: 20 (18, 23) Qualitative: PrEP-naïve young women (aged 16-25), PrEP-experienced women (aged 16-29), older women living with HIV (aged 26-32), men (aged 25-35)</p> | <p><b>Nature of Intervention:</b><br/>Young women were shown a 90-second PrEP demand creation video and two informational brochures and then asked to self-administer a short survey that included questions on demographics, sexual relationships, risk taking, HIV risk perception, PrEP interest and knowledge, and their opinions about the video..</p> <p><b>Intervention components:</b><br/>Research staff visited houses up to three times, requesting to speak with the young woman household resident. Young women who agreed to participate were shown the video and then asked to self-administer a short survey.</p> | <p><b>Quantitative</b></p> <ul style="list-style-type: none"> <li>• Most reported interest in learning more about PrEP (67.7% 'definitely interested' and 9.4% 'somewhat interested') and taking PrEP (56.4% 'definitely interested' and 12.5% 'somewhat interested').</li> <li>• Factors significantly associated with interest in taking PrEP were having a primary partner with whom they regularly have sex (80.0% vs. 65.2% without a primary partner; adjusted odds ratio (AOR)=3.1, 95% CI: 1.3, 7.0) and being in a sexual partnership for &lt;6 months (86.8% vs. 68.5% for &gt;12 months; AOR=3.0, 95% CI: 1.2, 7.3).</li> </ul> |
| <b>Research site</b> | Heffron et al. (2018) <sup>40</sup><br><br>East Africa | <p>Research article</p> <p>To present estimates of effectiveness and patterns of PrEP use within a two-year demonstration project of PrEP for HIV- negative members of heterosexual HIV</p> | <p><b>Study population:</b><br/>Offered to use PrEP services</p> <p><b>Sample</b><br/><b>Population:</b><br/>Serodiscordant couples<br/><b>Sample size (total – N):</b><br/>1010 couples<br/><b>Gender distribution:</b></p>                                                                                                                                                                                                                                                                                                                                                                                                                          | <p><b>Nature of Intervention:</b><br/>PrEP was offered at enrolment at research site to all HIV-negative participants as PrEP with a daily dosing schedule; participants electing not to initiate PrEP at enrolment were</p>                                                                                                                                                                                                                                                                                                                                                                                                      | <ul style="list-style-type: none"> <li>• 97% of HIV-negative partners-initiated PrEP.</li> <li>• Median duration of PrEP use was 12 months (IQR 6-18)</li> <li>• Adherence: 71% of HIV-negative participants took ≥80% of expected doses</li> </ul>                                                                                                                                                                                                                                                                                                                                                                                        |

|                                  |                                                         |                                                                                                                                                                                               |                                                                                                                                                                                                                                                                                                        |                                                                                                                                                                                                                                                                                                                                                                        |                                                                                                                                                                                                                                                                                                                                                                                                                                                                                                                                                                                                                              |
|----------------------------------|---------------------------------------------------------|-----------------------------------------------------------------------------------------------------------------------------------------------------------------------------------------------|--------------------------------------------------------------------------------------------------------------------------------------------------------------------------------------------------------------------------------------------------------------------------------------------------------|------------------------------------------------------------------------------------------------------------------------------------------------------------------------------------------------------------------------------------------------------------------------------------------------------------------------------------------------------------------------|------------------------------------------------------------------------------------------------------------------------------------------------------------------------------------------------------------------------------------------------------------------------------------------------------------------------------------------------------------------------------------------------------------------------------------------------------------------------------------------------------------------------------------------------------------------------------------------------------------------------------|
|                                  |                                                         | serodiscordant couples in East Africa.                                                                                                                                                        | Males: 1010<br>Females 1010<br><b>Age distribution:</b><br>HIV-: Age, years 30 (26, 36)<br>HIV+: Age, years 28 (23, 35)                                                                                                                                                                                | offered PrEP initiation at subsequent visits<br><b>Intervention components:</b> N/A<br><br><b>Intervention delivery setting:</b><br>Research site                                                                                                                                                                                                                      | <ul style="list-style-type: none"> <li>• 95% reduction (95% CI 86-98%, p&lt;0.0001) in HIV incidence, relative to estimated HIV incidence for the population in the absence of PrEP integrated into HIV treatment services.</li> </ul>                                                                                                                                                                                                                                                                                                                                                                                       |
| <b>Research site<sup>e</sup></b> | Ware et al. (2018) <sup>54</sup><br><br>Uganda          | Research article<br><br>To evaluate the integrated strategy of delivering PrEP & ART to find out why it was successful.                                                                       | <b>Study population:</b><br>Offered to use PrEP services<br><b>Sample</b><br><b>Sample size (total – N):</b> 93 couples<br><b>Gender distribution:</b> Female HIV-uninfected partner: (46%)<br><b>Age distribution:</b><br>HIV uninfected partner: 31 (26 to 37)<br>HIV infected partner 31 (25 to 37) | <b>Nature of Intervention:</b> The integrated strategy offered time-limited PrEP to uninfected partners as a "bridge" to long-term ART in the infected partner. Uninfected partners were offered PrEP at baseline and encouraged to discontinue once infected partners had used ART for six months.<br><b>Intervention components:</b><br>PrEP was integrated with ART | <ul style="list-style-type: none"> <li>• Couples viewed in services as hope for staying together, attending joint follow up appointments together increased mutual support, and travelling and waiting room time provided an opportunity for discussion, reflection and joint decision making.</li> <li>• Concern for partner wellbeing was a reason for initiating ART whilst the simultaneous use of ARVs turned management of HIV into a shared experience</li> <li>• Couples devised joint strategies for adhering to PrEP and ART such as mutual reminders and emotional and material support for adherence.</li> </ul> |
| <b>Research site</b>             | Atujuna et al. (2018) <sup>27</sup><br><br>South Africa | Research article<br><br>To explore acceptability and preferences for New biomedical prevention technologies (NPTs) among key and other vulnerable populations in two South African townships. | <b>Study population:</b><br>Never been offered to use PrEP services (hypothetical opinions related to PrEP)<br><b>Sample</b><br><b>Sample size (total – N)</b><br>Adolescents=14<br><b>Gender distribution:</b><br>Heterosexual women=10 Heterosexual men=9                                            | <b>Nature of Intervention:</b><br>n/a<br><b>Intervention components:</b><br>n/a<br><b>Intervention delivery setting:</b><br>n/a                                                                                                                                                                                                                                        | <ul style="list-style-type: none"> <li>• Different product preferences and motivations emerged by population based on similarity to existing practices and contexts of vulnerability.</li> <li>• Adult women and female adolescents preferred a vaginal ring and HIV vaccine, motivated by longer duration of protection to mitigate feared repercussions from male partners, including threats to their marriage and</li> </ul>                                                                                                                                                                                             |

|                                  |                                                                  |                                                                                                                                                                                                               |                                                                                                                                                                                                                                                                                                                                                                              |                                                                                                                                                                                                                                                                                                                                                                                                                                                                                                                                                                                                |                                                                                                                                                                                                                                                                                                                                                                                                                                                                                                                                                                                                                                                                                                                                          |
|----------------------------------|------------------------------------------------------------------|---------------------------------------------------------------------------------------------------------------------------------------------------------------------------------------------------------------|------------------------------------------------------------------------------------------------------------------------------------------------------------------------------------------------------------------------------------------------------------------------------------------------------------------------------------------------------------------------------|------------------------------------------------------------------------------------------------------------------------------------------------------------------------------------------------------------------------------------------------------------------------------------------------------------------------------------------------------------------------------------------------------------------------------------------------------------------------------------------------------------------------------------------------------------------------------------------------|------------------------------------------------------------------------------------------------------------------------------------------------------------------------------------------------------------------------------------------------------------------------------------------------------------------------------------------------------------------------------------------------------------------------------------------------------------------------------------------------------------------------------------------------------------------------------------------------------------------------------------------------------------------------------------------------------------------------------------------|
|                                  |                                                                  |                                                                                                                                                                                                               |                                                                                                                                                                                                                                                                                                                                                                              |                                                                                                                                                                                                                                                                                                                                                                                                                                                                                                                                                                                                | <p>safety, and a context of ubiquitous rape.</p> <ul style="list-style-type: none"> <li>• Male adolescents preferred an HIV vaccine, seen as protection in serodiscordant relationships and convenient in obviating the HIV stigma and cost involved in buying condoms.</li> <li>• Adult men preferred PrEP, given familiarity with oral medications and mistrust of injections, seen as enabling serodiscordant couples to have a child.</li> </ul>                                                                                                                                                                                                                                                                                     |
| <b>Research site<sup>e</sup></b> | <p>Baeten et al. (2016)<sup>50</sup></p> <p>Kenya and Uganda</p> | <p>Research article</p> <p>To understand the delivery feasibility and uptake of, as well as adherence to, an integrated package of ART and PrEP among high-risk heterosexual HIV-1-serodiscordant couples</p> | <p><b>Study population:</b><br/>Offered to use PrEP services</p> <p><b>Sample</b><br/><i>Sample size (total – N)</i><br/>1013 serodiscordant couples</p> <p><b>Gender distribution:</b><br/>HIV-1-uninfected partner Male: 679 (67%)</p> <p><b>Age distribution:</b><br/>HIV-1-uninfected partner Age &lt;25 y=207 (20%), HIV-1-infected partner Age &lt;25 y= 317 (31%)</p> | <p><b>Nature of Intervention:</b><br/>HIV- partners were offered PrEP which was provided at the study sites, as PrEP was not available otherwise in Kenya and Uganda during the study period. ART was offered at the study site or by referral to another HIV-1 care center of their choice</p> <p><b>Intervention components:</b></p> <ul style="list-style-type: none"> <li>- Couples were offered antiretroviral medications</li> <li>- Counselling on HIV-1 prevention benefits</li> </ul> <p>PrEP discontinued 6 months after the infected partner initiated antiretroviral treatment</p> | <ul style="list-style-type: none"> <li>• ART was initiated by 789 (78%) HIV-1-infected partners.</li> <li>• 960/1 013 (95%) HIV-uninfected partners-initiated PrEP at enrolment, and 2% initiated PrEP at a later visit.</li> <li>• Among those initiating PrEP at enrolment and attending the month 1 and 3 visits, 840 (97%) and 792 (94%) continued to receive PrEP.</li> <li>• Adherence to PrEP measured by pill counts of returned, unused pills, indicated that 95% of dispensed pills had been taken as expected and 88% of periods between study visits had adherence &gt;80%.</li> <li>• 14 initially HIV-1-seronegative partners seroconverted during follow-up (12 were infected at the time of study enrolment).</li> </ul> |

|                             |                                                             |                                                                                                                                                                                                                |                                                                                                                                                                                                                                                                                                   |                                                                                                                                                                                                                                                                                                                                                                                                                                                                                                                                                                                                                                                                                                                                                                                                                                                |                                                                                                                                                                                                                                                                                                                                                                                                                                                                                                                                                                                                                                                                                                                                                                                                                                                                                                                                   |
|-----------------------------|-------------------------------------------------------------|----------------------------------------------------------------------------------------------------------------------------------------------------------------------------------------------------------------|---------------------------------------------------------------------------------------------------------------------------------------------------------------------------------------------------------------------------------------------------------------------------------------------------|------------------------------------------------------------------------------------------------------------------------------------------------------------------------------------------------------------------------------------------------------------------------------------------------------------------------------------------------------------------------------------------------------------------------------------------------------------------------------------------------------------------------------------------------------------------------------------------------------------------------------------------------------------------------------------------------------------------------------------------------------------------------------------------------------------------------------------------------|-----------------------------------------------------------------------------------------------------------------------------------------------------------------------------------------------------------------------------------------------------------------------------------------------------------------------------------------------------------------------------------------------------------------------------------------------------------------------------------------------------------------------------------------------------------------------------------------------------------------------------------------------------------------------------------------------------------------------------------------------------------------------------------------------------------------------------------------------------------------------------------------------------------------------------------|
| <p><b>Research site</b></p> | <p>Heffron et al. (2019)<sup>51</sup></p> <p>Kenya</p>      | <p>Research article</p> <p>To determine uptake, use and effectiveness of a comprehensive safer conception intervention among HIV-serodiscordant couples with immediate fertility desires.</p>                  | <p><b>Study population:</b><br/>Offered to use PrEP services</p> <p><b>Sample Population:</b><br/>Serodiscordant couples</p> <p><b>Sample size (total – N):</b><br/>74</p> <p><b>Gender distribution:</b><br/>HIV-negative females/HIV positive males= 54%</p>                                    | <p><b>Nature of Intervention:</b><br/>Couples attended monthly visits at the study clinic prior to pregnancy and quarterly visits during pregnancy. Couples were followed for 12 months or until the end of pregnancy. During all visits, couples received counselling about HIV prevention, information about how to track women's menstrual cycles and identify peak fertility days and how to conduct vaginal self-insemination</p> <p><b>Intervention components:</b><br/>The intervention package included antiretroviral therapy (ART) for HIV-positive partners, oral pre-exposure prophylaxis (PrEP) for HIV-negative partners, daily fertility and sexual behaviour tracking via short message service (SMS) surveys, counselling on self-insemination, and referrals for voluntary medical male circumcision and fertility care.</p> | <ul style="list-style-type: none"> <li>• Of the 74 enrolled couples, 54% were HIV-negative female/HIV-positive male couples.</li> <li>• Prior to pregnancy, 100% of partners living with HIV used ART and 100% of HIV-negative partners-initiated PrEP.</li> <li>• One-month preceding pregnancy, 80.9% of HIV-positive partners were virally suppressed and 81.4% of HIV-negative partners were highly adherent to PrEP.</li> <li>• 42.6% pregnancies were protected using all four strategies i.e., men were circumcised, high adherence to PrEP, ART and timed condomless sex.</li> <li>• In addition to male circumcision, seven pregnancies (14.9%) were also protected by high adherence to PrEP and ART, 5 (10.6%) were protected by PrEP and timed condomless sex.</li> <li>• 0 HIV seroconversions (95% CI 0.0 to 6.0 per 100-person years) were observed indicating a 100% reduction in HIV risk (p = 0.04).</li> </ul> |
| <p><b>Research Site</b></p> | <p>Minnis et al (2020)<sup>56</sup></p> <p>South Africa</p> | <p>Research article</p> <p>Examined youths' preferences for key attributes of long-acting PrEP, with a focus on characteristics pertinent to product delivery alongside key modifiable product attributes.</p> | <p><b>Study population:</b><br/>Never been offered to use PrEP services (hypothetical opinions related to PrEP)</p> <p><b>Sample</b><br/><b>Sample size (total – N):</b> 807</p> <p><b>Gender distribution:</b><br/>Female: 401 (50%);<br/>Men who have sex with women only (MSW): 216 (27%).</p> | <p><b>Nature of Intervention:</b><br/>Participants were asked to choose between two hypothetical PrEP products composed of five attributes product form (injection, implant); dosing frequency (two, six or twelve months); where to obtain the product (clinic, pharmacy, community</p>                                                                                                                                                                                                                                                                                                                                                                                                                                                                                                                                                       | <ul style="list-style-type: none"> <li>• All three subgroups had strong preference for a product with a one-year duration over two months (p &lt; 0.001).</li> <li>• MSW placed the most importance on dosing frequency, with it being five times more important than any other attribute.</li> </ul>                                                                                                                                                                                                                                                                                                                                                                                                                                                                                                                                                                                                                             |



|                      |                                                  |                                                                                                                                                                                        |                                                                                                                                                                                                                                                                                     |                                                                                                                                                                                                                                                                                                                                                                                                                                                                                                                                                                                           |                                                                                                                                                                                                                                                                                                                                                                                                                                                                                                                                                                                                                                                                                                                                                                                                                                                                                                |
|----------------------|--------------------------------------------------|----------------------------------------------------------------------------------------------------------------------------------------------------------------------------------------|-------------------------------------------------------------------------------------------------------------------------------------------------------------------------------------------------------------------------------------------------------------------------------------|-------------------------------------------------------------------------------------------------------------------------------------------------------------------------------------------------------------------------------------------------------------------------------------------------------------------------------------------------------------------------------------------------------------------------------------------------------------------------------------------------------------------------------------------------------------------------------------------|------------------------------------------------------------------------------------------------------------------------------------------------------------------------------------------------------------------------------------------------------------------------------------------------------------------------------------------------------------------------------------------------------------------------------------------------------------------------------------------------------------------------------------------------------------------------------------------------------------------------------------------------------------------------------------------------------------------------------------------------------------------------------------------------------------------------------------------------------------------------------------------------|
|                      |                                                  |                                                                                                                                                                                        | <p>Men who have sex with men MSM): 190 (23%)</p> <p><b>Age distribution:</b><br/>Median age (IQR):<br/>Female: 21 (19 to 22);<br/>men who have sex with women only: 21 (19 to 22) men who have sex with men: 20 (19 to 22)</p>                                                      | <p>distribution, mobile clinic - all models for current HIV prevention and contraceptive service delivery); pain involved with injection or insertion (mild, moderate) and delivery location on the body (arm, buttock, thigh).</p> <p><b>Intervention components:</b><br/>Participants completed interviews on a tablet computer. The survey first introduced each attribute individually with both visual and narrative descriptions. Participants were then presented with nine DCE choice questions, each one a unique choice<br/><b>NB:</b> PrEP was not provided in this study.</p> | <ul style="list-style-type: none"> <li>• Females had greater preference for a single injection over an implant compared to MSW (<math>p \leq 0.004</math>).</li> <li>• Females and MSW expressed more preference for two injections compared with implants (<math>p \leq 0.009</math>).</li> <li>• Females preferred using a product that was offered at a health clinic over accessing it at a pharmacy (<math>p &lt; 0.001</math>).</li> <li>• All youth preferred product insertion in the arm (<math>p &lt; 0.001</math>).</li> <li>• Females disliked insertion in the thigh and both MSW and MSM disliked insertion on the buttocks (<math>p = 0.01</math>).</li> <li>• Youth indicated strong preferences for longer duration products.</li> </ul> <p>Each attribute nonetheless influenced preferences, offering insight into trade-offs that inform long-acting PrEP development.</p> |
| <b>Other</b>         |                                                  |                                                                                                                                                                                        |                                                                                                                                                                                                                                                                                     |                                                                                                                                                                                                                                                                                                                                                                                                                                                                                                                                                                                           |                                                                                                                                                                                                                                                                                                                                                                                                                                                                                                                                                                                                                                                                                                                                                                                                                                                                                                |
| <b>Not described</b> | Jani et al. (2018) <sup>59</sup><br><br>Tanzania | Conference abstract<br><br>To describe support for PrEP use among male partners of AGYW in Tanzania via a qualitative comparative analysis of AGYW's and male partners of AGYW's views | <p><b>Study population:</b><br/>Never been offered to use PrEP services (hypothetical opinions related to PrEP)</p> <p><b>Sample</b><br/><b>Sample size (total – N):</b> not described<br/><b>Gender distribution:</b> not described<br/><b>Age distribution:</b> not described</p> | <p><b>Nature of Intervention:</b> Prior to IDIs and FGDs participants were acquainted with PrEP, by sharing a visual, standardized script of PrEP information with them. 24 IDIs and 4 FGDs with AGYW; 16 IDIs with men</p> <p><b>Intervention components:</b><br/>PrEP for AGYW</p>                                                                                                                                                                                                                                                                                                      | <ul style="list-style-type: none"> <li>• AGYW and male partners agreed that most male partners would be willing to support PrEP use by AGYW.</li> <li>• However, male partner support might be contingent on their early involvement in the decision-making process regarding PrEP.</li> <li>• Early inclusion was perceived to remove suspicion of infidelity and alleviate negative consequences associated with</li> </ul>                                                                                                                                                                                                                                                                                                                                                                                                                                                                  |

1  
2  
3  
4  
5  
6  
7  
8  
9  
10  
11  
12  
13  
14  
15  
16  
17  
18  
19  
20  
21  
22  
23  
24  
25  
26  
27  
28  
29  
30  
31  
32  
33  
34  
35  
36  
37  
38  
39  
40  
41  
42  
43  
44  
45  
46  
47

|                      |                                                    |                                                                                                                                          |                                                                                                                                                                                                                                                                                                 |                                                                                                                                                                                                                                                                                               |                                                                                                                                                                                                                                                                                                                                                                                                                                                                                                                                                                                                                                                                                                                                                                                            |
|----------------------|----------------------------------------------------|------------------------------------------------------------------------------------------------------------------------------------------|-------------------------------------------------------------------------------------------------------------------------------------------------------------------------------------------------------------------------------------------------------------------------------------------------|-----------------------------------------------------------------------------------------------------------------------------------------------------------------------------------------------------------------------------------------------------------------------------------------------|--------------------------------------------------------------------------------------------------------------------------------------------------------------------------------------------------------------------------------------------------------------------------------------------------------------------------------------------------------------------------------------------------------------------------------------------------------------------------------------------------------------------------------------------------------------------------------------------------------------------------------------------------------------------------------------------------------------------------------------------------------------------------------------------|
|                      |                                                    |                                                                                                                                          |                                                                                                                                                                                                                                                                                                 |                                                                                                                                                                                                                                                                                               | <p>late or inadvertent disclosure of PrEP use.</p> <ul style="list-style-type: none"> <li>• AGYW suggested potential social harms (relationship dissolution, loss of financial support, and verbal and physical violence) if male partners are not involved whilst male partners denied such potential extreme consequences.</li> <li>• Male participants recommended strategies on gaining men’s support of PrEP including providing education to men on PrEP, equipping AGYW with skills to educate their partners, couples counselling by providers, provision of PrEP for men, and community education and sensitization.</li> <li>• Educating male partners about PrEP and engaging them in implementation activities should be part of PrEP roll-out strategies for AGYW.</li> </ul> |
| <b>Not described</b> | Makyao et al. (2018) <sup>60</sup><br><br>Tanzania | Conference abstract<br><br>To explore how social norms and gendered parenting roles might influence parental support of AGYW's PrEP use. | <p><b>Study population:</b><br/>Never been offered to use PrEP services (hypothetical opinions related to PrEP)</p> <p><b>Sample</b><br/><i>Sample size (total – N):</i> 55<br/><i>Gender distribution:</i> Female parents: 28; Male parents: 27<br/><i>Age distribution:</i> not described</p> | <p><b>Nature of Intervention:</b> Prior to IDIs and FGDs participants were acquainted with PrEP, by sharing a visual, standardized script of PrEP information with them. 4 FGDs with male parents and 4 FGDs with female parents</p> <p><b>Intervention components:</b><br/>PrEP for AGYW</p> | <ul style="list-style-type: none"> <li>• Parents supported PrEP availability recognizing AGYW's high risk of HIV due to limited power to negotiate preventative behaviours and frequent violence in sexual relationships.</li> <li>• Differential parenting roles influenced the type of support. Men noted shame and embarrassment in communicating with their</li> </ul>                                                                                                                                                                                                                                                                                                                                                                                                                 |

|                         |                                                      |                                                                                                                                                                                                        |                                                                                                                                                                                                                                                                                                                                                 |                                                                                                                                                   |                                                                                                                                                                                                                                                                                                                                                                                                                                                                                                                                                                                                                  |
|-------------------------|------------------------------------------------------|--------------------------------------------------------------------------------------------------------------------------------------------------------------------------------------------------------|-------------------------------------------------------------------------------------------------------------------------------------------------------------------------------------------------------------------------------------------------------------------------------------------------------------------------------------------------|---------------------------------------------------------------------------------------------------------------------------------------------------|------------------------------------------------------------------------------------------------------------------------------------------------------------------------------------------------------------------------------------------------------------------------------------------------------------------------------------------------------------------------------------------------------------------------------------------------------------------------------------------------------------------------------------------------------------------------------------------------------------------|
|                         |                                                      |                                                                                                                                                                                                        |                                                                                                                                                                                                                                                                                                                                                 |                                                                                                                                                   | <p>daughters about relationships and sex.</p> <ul style="list-style-type: none"> <li>• Social norms around adolescent sexuality influenced parental support. Parents were wary of being viewed as condoning pre-marital sexual activity, while they worried that AGYW could be stigmatized as promiscuous.</li> <li>• Parents recommended strategies for supporting their daughters PrEP use included: creating a supportive environment for PrEP use (e.g., ensuring good diet) while male parents described offering logistical and material support (e.g., providing transport to health centres).</li> </ul> |
| n/a<br><b>Modelling</b> | Cremin et al. (2015) <sup>57</sup><br><br>Mozambique | <p>Research article</p> <p>The aim of this paper is to estimate the prevention impact and the cost effectiveness of providing time-limited PrEP to partners of migrant miners in Gaza, Mozambique.</p> | <p><b>Study population:</b><br/>Never been offered to use PrEP services (hypothetical opinions related to PrEP)</p> <p><b>Sample</b><br/><b>Population:</b><br/>adult heterosexual</p> <p><b>Sample size (total – N):</b><br/>Note mentioned (modelling)</p> <p><b>Gender distribution:</b><br/>N/A</p> <p><b>Age distribution:</b><br/>N/A</p> | <p><b>Nature of Intervention:</b><br/>n/a</p> <p><b>Intervention components:</b><br/>n/a</p> <p><b>Intervention delivery setting:</b><br/>n/a</p> | <ul style="list-style-type: none"> <li>• Providing time-limited PrEP to partners of migrant miners in Gaza Province during periods of increased exposure would be a novel strategy for providing PrEP. This strategy would allow for a better prioritized intervention, with the potential to improve the efficiency of a PrEP intervention considerably, as well as providing important reproductive health benefits</li> </ul>                                                                                                                                                                                 |
| n/a<br><b>Modelling</b> | Irungu et al. (2019) <sup>58</sup><br><br>Kenya      | <p>Research article</p> <p>To provide estimates of the cost of delivering antiretroviral-based HIV prevention to HIV serodiscordant couples in</p>                                                     | <p><b>Study population:</b><br/>Never been offered to use PrEP services (hypothetical opinions related to PrEP)</p> <p><b>Sample</b><br/><b>Population:</b><br/>Heterosexual couples</p> <p><b>Sample size (total – N):</b> N/A</p>                                                                                                             | <p><b>Nature of Intervention:</b><br/>n/a</p> <p><b>Intervention components:</b><br/>n/a</p>                                                      | <ul style="list-style-type: none"> <li>• Time-limited provision of PrEP to the HIV uninfected partner within HIV serodiscordant couples can be an affordable delivery model implemented in HIV care programs in Kenya and similar settings. These</li> </ul>                                                                                                                                                                                                                                                                                                                                                     |

|                               |                                                           |                                                                                                                                              |                                                                                                                                                                                                                                                                                           |                                                                                                                                                                                                 |                                                                                                                                                                                                                                                                                                                                                                                                                                                                                                            |
|-------------------------------|-----------------------------------------------------------|----------------------------------------------------------------------------------------------------------------------------------------------|-------------------------------------------------------------------------------------------------------------------------------------------------------------------------------------------------------------------------------------------------------------------------------------------|-------------------------------------------------------------------------------------------------------------------------------------------------------------------------------------------------|------------------------------------------------------------------------------------------------------------------------------------------------------------------------------------------------------------------------------------------------------------------------------------------------------------------------------------------------------------------------------------------------------------------------------------------------------------------------------------------------------------|
|                               |                                                           | public health facilities in Kenya and the incremental cost of providing PrEP as a component of this strategy.                                | <p><b>Gender distribution:</b><br/>none provided</p> <p><b>Age distribution:</b><br/>No age disaggregation</p>                                                                                                                                                                            |                                                                                                                                                                                                 | costs can be used for budgetary planning and cost effectiveness analyses.                                                                                                                                                                                                                                                                                                                                                                                                                                  |
| n/a<br>Modelling <sup>e</sup> | Ngure et al. (2020) <sup>34</sup><br><br>Kenya and Uganda | Research article<br><br>To estimate the associations between effective contraceptive use and 1) PrEP dispensation 2) high effective PrEP use | <p><b>Study population:</b><br/>Offered to use PrEP services</p> <p><b>Sample</b></p> <p><b>Population:</b></p> <p><b>Sample size (total – N):</b> 311</p> <p><b>Gender distribution:</b><br/>Female: 100%</p> <p><b>Age distribution:</b><br/>Median age: 29 years ([IQR] 24.0-35.0)</p> | <p><b>Nature of Intervention:</b><br/>HIV-uninfected women were provided with both PrEP and effective contraception</p> <p><b>Intervention components:</b><br/>PrEP was integrated with ART</p> | <ul style="list-style-type: none"> <li>• PrEP dispensation was more frequent among those concurrently using effective contraception, (adjusted relative risk [aRR]=1.19; 95% confidence interval [CI]=1.08-1.32) and contraceptive use was more common among those on PrEP (aRR=1.63; 95% CI=1.18-2.25).</li> <li>• Healthcare delivery models that integrate the provision of family planning and PrEP may successfully promote both preventive products, especially long-acting contraception</li> </ul> |

a. Conducted in the context of the Girl Power study b. Conducted in the context of the PrEP Implementation in Young Women and Adolescents (PriYA) study c. Conducted in the context of the Prevention Option for Women Evaluation Research (POWER) project d. Conducted in the context of the Sustainable East Africa Research in Community Health (SEARCH) study e. Implemented within The Partners Demonstration Project

| Author                                                                                                                                                                                            | Item |   |   |   |   |     |   |   |   |    | 11 |
|---------------------------------------------------------------------------------------------------------------------------------------------------------------------------------------------------|------|---|---|---|---|-----|---|---|---|----|----|
|                                                                                                                                                                                                   | 1    | 2 | 3 | 4 | 5 | 6   | 7 | 8 | 9 | 10 |    |
| <b>Qualitative studies using the CASP Tool <sup>22</sup></b>                                                                                                                                      |      |   |   |   |   |     |   |   |   |    |    |
| Atujuna et al., 2018 <sup>51</sup>                                                                                                                                                                | +    | + | + | + | + | +   | + | + | + | +  |    |
| Bassett et al., 2019 <sup>46</sup>                                                                                                                                                                | +    | + | + | ? | + | ?   | + | + | + | +  |    |
| Bell et al., 2019 <sup>36*</sup>                                                                                                                                                                  | +    | + | + | ? | ? | -   | - | ? | - | ?  |    |
| Camlin et al., 2020 <sup>42</sup>                                                                                                                                                                 | +    | + | + | + | + | +   | + | + | + | +  |    |
| Gombe et al., 2020 <sup>44</sup>                                                                                                                                                                  | +    | + | ? | ? | + | +   | + | + | + | +  |    |
| Jani et al., <sup>55</sup>                                                                                                                                                                        | +    | + | + | ? | ? | -   | ? | ? | + | ?  |    |
| Makyao et al., <sup>56</sup>                                                                                                                                                                      | +    | + | + | ? | ? | -   | - | ? | ? | ?  |    |
| Maseko et al., <sup>25</sup>                                                                                                                                                                      | +    | ? | - | - | + | ?   | - | + | ? | ?  |    |
| Ngure et al., 2016 <sup>38</sup>                                                                                                                                                                  | +    | + | + | + | + | +   | + | + | + | +  |    |
| Pintye et al., 2019 <sup>29</sup>                                                                                                                                                                 | +    | + | + | ? | + | ?   | ? | ? | + | +  |    |
| Ware et al., 2018 <sup>50</sup>                                                                                                                                                                   | +    | + | + | + | + | ?   | + | ? | ? | ?  |    |
| Morton et al., 2020 <sup>48*</sup>                                                                                                                                                                | +    | + | + | + | + | -   | + | ? | + | +  |    |
| Were et al., 2020 <sup>35*</sup>                                                                                                                                                                  | +    | + | + | + | + | +   | + | + | + | +  |    |
| Sack et al., 2021 <sup>51</sup>                                                                                                                                                                   | +    | + | + | + | + | +   | + | + | + | +  |    |
| <b>Comparative studies including randomised trials, nonrandomised trials, interrupted time series and controlled-before after studies using the EPOC tool <sup>21</sup></b>                       |      |   |   |   |   |     |   |   |   |    |    |
| Delany-Moretlwe et al., 2018 <sup>34</sup>                                                                                                                                                        | ?    | ? | + | ? | ? | ?   | ? | ? | ? |    |    |
| Koss et al., 2018 <sup>39</sup>                                                                                                                                                                   | -    | ? | + | + | ? | +   | + | + | + |    |    |
| Donnell et al., 2021 <sup>34</sup>                                                                                                                                                                | ?    | ? | + | + | ? | ?   | ? | + | + |    |    |
| <b>Studies involving descriptions of interventions, implementation or policy processes with very limited empirical data and other non-conventional sources using the WEIRD tool <sup>23</sup></b> |      |   |   |   |   |     |   |   |   |    |    |
| Baetan et al., 2016 <sup>52</sup>                                                                                                                                                                 | +    | + | + | ! | + | N/A | ! | + | + | +  | +  |
| Bassett et al., 2018 <sup>45</sup>                                                                                                                                                                | +    | + | ? | + | + | +   | ? | + | + | +  | +  |
| Bell et al., 2019 <sup>36*</sup>                                                                                                                                                                  | !    | - | - | ? | ? | ?   | ? | - | ? | -  | -  |
| Heffron et al., 2018 <sup>49</sup>                                                                                                                                                                | +    | ? | ! | ? | ? | +   | ? | + | + | +  | +  |
| Heffron et al., 2018 <sup>37</sup>                                                                                                                                                                | +    | ! | ! | ! | - | !   | ? | ? | ? | +  | +  |

|                                    |   |   |   |   |     |     |   |   |   |   |   |
|------------------------------------|---|---|---|---|-----|-----|---|---|---|---|---|
| Kinuthia et al.,2020 <sup>28</sup> | + | + | + | ! | ?   | N/A | ! | ! | ! | + | + |
| Koss et al., 2020 <sup>40</sup>    | ? | ? | ? | ? | ?   | ?   | ? | ? | ? | ? | ? |
| Koss et al.,2017 <sup>43</sup>     | - | - | - | - | -   | +   | ? | ? | + | ? | - |
| Lubwama et al., 2019 <sup>47</sup> | - | + | - | ? | N/A | !   | - | - | ? | + | - |
| Mayer et al.,2019 <sup>41</sup>    | + | + | + | + | +   | N/A | ! | + | + | + | + |
| Mugwanya et al.,2019 <sup>26</sup> | + | + | ? | ? | !   | !   | ! | ! | ! | + | ! |
| Ongwen et al.,2019 <sup>32</sup>   | ! | ! | ? | ! | +   | N/A | ! | - | ! | ? | - |
| Pintye et al.,2018 <sup>27</sup>   | + | ! | ! | ! | ?   | ?   | ? | ! | ! | ? | ? |
| Rousseau et al.,2019 <sup>33</sup> | ? | ? | ? | ? | ?   | ?   | ? | ? | ? | ? | ? |
| Travill et al.,2018 <sup>31</sup>  | ! | ? | ? | ! | ?   | ?   | ? | - | - | - | - |
| Hill et al.,2020 <sup>30</sup>     | + | + | + | + | +   | +   | + | + | + | + | + |
| Morton et al.,2020 <sup>48*</sup>  | + | + | + | + | +   | +   | + | + | + | ! | + |
| Minnis et al.,2020 <sup>54</sup>   | + | + | + | + | +   | +   | + | + | + | + | + |
| Were et al.,2020 <sup>35*</sup>    | + | + | + | + | +   | +   | + | + | + | + | + |

+=Yes/Low risk/No or very minor concerns; -=No/High risk/Serious concerns'; ?=Can't tell/Unclear risk/Moderate concerns; !=Minor concerns

\*Mixed methods study, Modelling studies were not appraised

## Preferred Reporting Items for Systematic reviews and Meta-Analyses extension for Scoping Reviews (PRISMA-ScR) Checklist

| SECTION                                               | ITEM | PRISMA-ScR CHECKLIST ITEM                                                                                                                                                                                                                                                                                  | REPORTED ON PAGE # |
|-------------------------------------------------------|------|------------------------------------------------------------------------------------------------------------------------------------------------------------------------------------------------------------------------------------------------------------------------------------------------------------|--------------------|
| <b>TITLE</b>                                          |      |                                                                                                                                                                                                                                                                                                            |                    |
| Title                                                 | 1    | Identify the report as a scoping review.                                                                                                                                                                                                                                                                   | 1                  |
| <b>ABSTRACT</b>                                       |      |                                                                                                                                                                                                                                                                                                            |                    |
| Structured summary                                    | 2    | Provide a structured summary that includes (as applicable): background, objectives, eligibility criteria, sources of evidence, charting methods, results, and conclusions that relate to the review questions and objectives.                                                                              | 2                  |
| <b>INTRODUCTION</b>                                   |      |                                                                                                                                                                                                                                                                                                            |                    |
| Rationale                                             | 3    | Describe the rationale for the review in the context of what is already known. Explain why the review questions/objectives lend themselves to a scoping review approach.                                                                                                                                   | 3-5                |
| Objectives                                            | 4    | Provide an explicit statement of the questions and objectives being addressed with reference to their key elements (e.g., population or participants, concepts, and context) or other relevant key elements used to conceptualize the review questions and/or objectives.                                  | 5                  |
| <b>METHODS</b>                                        |      |                                                                                                                                                                                                                                                                                                            |                    |
| Protocol and registration                             | 5    | Indicate whether a review protocol exists; state if and where it can be accessed (e.g., a Web address); and if available, provide registration information, including the registration number.                                                                                                             | 6                  |
| Eligibility criteria                                  | 6    | Specify characteristics of the sources of evidence used as eligibility criteria (e.g., years considered, language, and publication status), and provide a rationale.                                                                                                                                       | 6-7                |
| Information sources*                                  | 7    | Describe all information sources in the search (e.g., databases with dates of coverage and contact with authors to identify additional sources), as well as the date the most recent search was executed.                                                                                                  | 7                  |
| Search                                                | 8    | Present the full electronic search strategy for at least 1 database, including any limits used, such that it could be repeated.                                                                                                                                                                            | 7                  |
| Selection of sources of evidence†                     | 9    | State the process for selecting sources of evidence (i.e., screening and eligibility) included in the scoping review.                                                                                                                                                                                      | 7                  |
| Data charting process‡                                | 10   | Describe the methods of charting data from the included sources of evidence (e.g., calibrated forms or forms that have been tested by the team before their use, and whether data charting was done independently or in duplicate) and any processes for obtaining and confirming data from investigators. | 7                  |
| Data items                                            | 11   | List and define all variables for which data were sought and any assumptions and simplifications made.                                                                                                                                                                                                     | 7                  |
| Critical appraisal of individual sources of evidence§ | 12   | If done, provide a rationale for conducting a critical appraisal of included sources of evidence; describe the methods used and how this information was used in any data synthesis (if appropriate).                                                                                                      | 7                  |



| SECTION                                       | ITEM | PRISMA-ScR CHECKLIST ITEM                                                                                                                                                                       | REPORTED ON PAGE # |
|-----------------------------------------------|------|-------------------------------------------------------------------------------------------------------------------------------------------------------------------------------------------------|--------------------|
| Synthesis of results                          | 13   | Describe the methods of handling and summarizing the data that were charted.                                                                                                                    | 8                  |
| <b>RESULTS</b>                                |      |                                                                                                                                                                                                 |                    |
| Selection of sources of evidence              | 14   | Give numbers of sources of evidence screened, assessed for eligibility, and included in the review, with reasons for exclusions at each stage, ideally using a flow diagram.                    | 8-9                |
| Characteristics of sources of evidence        | 15   | For each source of evidence, present characteristics for which data were charted and provide the citations.                                                                                     | 9-28               |
| Critical appraisal within sources of evidence | 16   | If done, present data on critical appraisal of included sources of evidence (see item 12).                                                                                                      | 29                 |
| Results of individual sources of evidence     | 17   | For each included source of evidence, present the relevant data that were charted that relate to the review questions and objectives.                                                           | 29-33              |
| Synthesis of results                          | 18   | Summarize and/or present the charting results as they relate to the review questions and objectives.                                                                                            | 29-33              |
| <b>DISCUSSION</b>                             |      |                                                                                                                                                                                                 |                    |
| Summary of evidence                           | 19   | Summarize the main results (including an overview of concepts, themes, and types of evidence available), link to the review questions and objectives, and consider the relevance to key groups. | 33-36              |
| Limitations                                   | 20   | Discuss the limitations of the scoping review process.                                                                                                                                          | 36                 |
| Conclusions                                   | 21   | Provide a general interpretation of the results with respect to the review questions and objectives, as well as potential implications and/or next steps.                                       | 36                 |
| <b>FUNDING</b>                                |      |                                                                                                                                                                                                 |                    |
| Funding                                       | 22   | Describe sources of funding for the included sources of evidence, as well as sources of funding for the scoping review. Describe the role of the funders of the scoping review.                 | 37                 |

JBI = Joanna Briggs Institute; PRISMA-ScR = Preferred Reporting Items for Systematic reviews and Meta-Analyses extension for Scoping Reviews.

\* Where *sources of evidence* (see second footnote) are compiled from, such as bibliographic databases, social media platforms, and Web sites.

† A more inclusive/heterogeneous term used to account for the different types of evidence or data sources (e.g., quantitative and/or qualitative research, expert opinion, and policy documents) that may be eligible in a scoping review as opposed to only studies. This is not to be confused with *information sources* (see first footnote).

‡ The frameworks by Arksey and O'Malley (6) and Levac and colleagues (7) and the JBI guidance (4, 5) refer to the process of data extraction in a scoping review as data charting.

§ The process of systematically examining research evidence to assess its validity, results, and relevance before using it to inform a decision. This term is used for items 12 and 19 instead of "risk of bias" (which is more applicable to systematic reviews of interventions) to include and acknowledge the various sources of evidence that may be used in a scoping review (e.g., quantitative and/or qualitative research, expert opinion, and policy document).

From: Tricco AC, Lillie E, Zarin W, O'Brien KK, Colquhoun H, Levac D, et al. PRISMA Extension for Scoping Reviews (PRISMA-ScR): Checklist and Explanation. *Ann Intern Med.* 2018;169:467–473. doi: [10.7326/M18-0850](https://doi.org/10.7326/M18-0850).



St. Michael's

Inspired Care.  
Inspiring Science.

For peer review only - <http://bmjopen.bmj.com/site/about/guidelines.xhtml>
