# Supplementary material for: Service delivery models that promote linkages to PrEP for adolescent girls and young women and men in sub-Saharan Africa: a scoping review
Source: PubMed Central journal article supplement — BMJ Open. 2023 Mar 27;13(3):e061503. doi: 10.1136/bmjopen-2022-061503 (PMC10069497; doi:10.1136/bmjopen-2022-061503), 2023-03-27
Supplement: bmjopen-2022-061503supp001.pdf [file bmjopen-2022-061503supp001.pdf]

| SET |                                   | SEARCH TERMS                                                                     |
|-----|-----------------------------------|----------------------------------------------------------------------------------|
| 1   | <b>1 HIV</b>                      | HIV-1                                                                            |
| 2   |                                   | HIV                                                                              |
| 3   |                                   | Hiv                                                                              |
| 4   |                                   | Set 1- 3 will be combined with “or”                                              |
| 5   | <b>2 Pre-exposure Prophylaxis</b> | PRE-EXPOSURE PROPHYLAXIS                                                         |
| 6   |                                   | Pre-Exposure Prophylaxis                                                         |
| 7   |                                   | PrEP                                                                             |
| 8   |                                   | Set 5-7 will be combined with “or”                                               |
| 9   |                                   | Set 4 and 8 will be combined with “and”                                          |
| 10  | <b>3 Linkage to care</b>          | service provision                                                                |
| 11  |                                   | service delivery                                                                 |
| 12  |                                   | SDMs                                                                             |
| 13  |                                   | IMPLEMENTATION SCIENCE                                                           |
| 14  |                                   | model                                                                            |
| 15  |                                   | models of care                                                                   |
| 16  |                                   | differentiated care                                                              |
| 17  |                                   | linkage                                                                          |
| 18  |                                   | linkage to care                                                                  |
| 19  | intervention                      |                                                                                  |
| 20  |                                   | Set 10-19 will be combined with “or”                                             |
| 21  |                                   | Set 4, 9 and 20 will be combined with “and”                                      |
| 22  | <b>4 Country</b>                  | DEVELOPING COUNTRY                                                               |
| 23  |                                   | Sub-Saharan                                                                      |
| 24  |                                   | AFRICA SOUTH OF THE SAHARA                                                       |
| 25  |                                   | AFRICA                                                                           |
| 26  |                                   | <i>All sub-Saharan countries included as MeSH and text term combined with or</i> |
| 27  |                                   | Set 22-26 will be combined with “or”                                             |
| 28  |                                   | Set 4, 9, 20 and 27 will be combined with “and”                                  |
