# Supplementary material for: Service delivery models that promote linkages to PrEP for adolescent girls and young women and men in sub-Saharan Africa: a scoping review
Source: PubMed Central journal article supplement — BMJ Open. 2023 Mar 27;13(3):e061503. doi: 10.1136/bmjopen-2022-061503 (PMC10069497; doi:10.1136/bmjopen-2022-061503), 2023-03-27
Supplement: bmjopen-2022-061503supp003.pdf [file bmjopen-2022-061503supp003.pdf]

| Author                                                                                                                                                                                           | Item |   |   |   |   |     |   |   |   |    | 11 |
|--------------------------------------------------------------------------------------------------------------------------------------------------------------------------------------------------|------|---|---|---|---|-----|---|---|---|----|----|
|                                                                                                                                                                                                  | 1    | 2 | 3 | 4 | 5 | 6   | 7 | 8 | 9 | 10 |    |
| <b>Qualitative studies using the CASP Tool<sup>22</sup></b>                                                                                                                                      |      |   |   |   |   |     |   |   |   |    |    |
| Atujuna et al., 2018 <sup>51</sup>                                                                                                                                                               | +    | + | + | + | + | +   | + | + | + | +  |    |
| Bassett et al., 2019 <sup>46</sup>                                                                                                                                                               | +    | + | + | ? | + | ?   | + | + | + | +  |    |
| Bell et al., 2019 <sup>36*</sup>                                                                                                                                                                 | +    | + | + | ? | ? | -   | - | ? | - | ?  |    |
| Camlin et al., 2020 <sup>42</sup>                                                                                                                                                                | +    | + | + | + | + | +   | + | + | + | +  |    |
| Gombe et al., 2020 <sup>44</sup>                                                                                                                                                                 | +    | + | ? | ? | + | +   | + | + | + | +  |    |
| Jani et al., <sup>55</sup>                                                                                                                                                                       | +    | + | + | ? | ? | -   | ? | ? | + | ?  |    |
| Makyao et al., <sup>56</sup>                                                                                                                                                                     | +    | + | + | ? | ? | -   | - | ? | ? | ?  |    |
| Maseko et al., <sup>25</sup>                                                                                                                                                                     | +    | ? | - | - | + | ?   | - | + | ? | ?  |    |
| Ngure et al., 2016 <sup>38</sup>                                                                                                                                                                 | +    | + | + | + | + | +   | + | + | + | +  |    |
| Pintye et al., 2019 <sup>29</sup>                                                                                                                                                                | +    | + | + | ? | + | ?   | ? | ? | + | +  |    |
| Ware et al., 2018 <sup>50</sup>                                                                                                                                                                  | +    | + | + | + | + | ?   | + | ? | ? | ?  |    |
| Morton et al., 2020 <sup>48*</sup>                                                                                                                                                               | +    | + | + | + | + | -   | + | ? | + | +  |    |
| Were et al., 2020 <sup>35*</sup>                                                                                                                                                                 | +    | + | + | + | + | +   | + | + | + | +  |    |
| Sack et al., 2021 <sup>51</sup>                                                                                                                                                                  | +    | + | + | + | + | +   | + | + | + | +  |    |
| <b>Comparative studies including randomised trials, nonrandomised trials, interrupted time series and controlled-before after studies using the EPOC tool<sup>21</sup></b>                       |      |   |   |   |   |     |   |   |   |    |    |
| Delany-Moretlwe et al., 2018 <sup>34</sup>                                                                                                                                                       | ?    | ? | + | ? | ? | ?   | ? | ? | ? |    |    |
| Koss et al., 2018 <sup>39</sup>                                                                                                                                                                  | -    | ? | + | + | ? | +   | + | + | + |    |    |
| Donnell et al., 2021 <sup>34</sup>                                                                                                                                                               | ?    | ? | + | + | ? | ?   | ? | + | + |    |    |
| <b>Studies involving descriptions of interventions, implementation or policy processes with very limited empirical data and other non-conventional sources using the WEIRD tool<sup>23</sup></b> |      |   |   |   |   |     |   |   |   |    |    |
| Baetan et al., 2016 <sup>52</sup>                                                                                                                                                                | +    | + | + | ! | + | N/A | ! | + | + | +  | +  |
| Bassett et al., 2018 <sup>45</sup>                                                                                                                                                               | +    | + | ? | + | + | +   | ? | + | + | +  | +  |
| Bell et al., 2019 <sup>36*</sup>                                                                                                                                                                 | !    | - | - | ? | ? | ?   | ? | - | ? | -  | -  |
| Heffron et al., 2018 <sup>49</sup>                                                                                                                                                               | +    | ? | ! | ? | ? | +   | ? | + | + | +  | +  |
| Heffron et al., 2018 <sup>37</sup>                                                                                                                                                               | +    | ! | ! | ! | - | !   | ? | ? | ? | +  | +  |

|                                    |   |   |   |   |     |     |   |   |   |   |   |
|------------------------------------|---|---|---|---|-----|-----|---|---|---|---|---|
| Kinuthia et al.,2020 <sup>28</sup> | + | + | + | ! | ?   | N/A | ! | ! | ! | + | + |
| Koss et al., 2020 <sup>40</sup>    | ? | ? | ? | ? | ?   | ?   | ? | ? | ? | ? | ? |
| Koss et al.,2017 <sup>43</sup>     | - | - | - | - | -   | +   | ? | ? | + | ? | - |
| Lubwama et al., 2019 <sup>47</sup> | - | + | - | ? | N/A | !   | - | - | ? | + | - |
| Mayer et al.,2019 <sup>41</sup>    | + | + | + | + | +   | N/A | ! | + | + | + | + |
| Mugwanya et al.,2019 <sup>26</sup> | + | + | ? | ? | !   | !   | ! | ! | ! | + | ! |
| Ongwen et al.,2019 <sup>32</sup>   | ! | ! | ? | ! | +   | N/A | ! | - | ! | ? | - |
| Pintye et al.,2018 <sup>27</sup>   | + | ! | ! | ! | ?   | ?   | ? | ! | ! | ? | ? |
| Rousseau et al.,2019 <sup>33</sup> | ? | ? | ? | ? | ?   | ?   | ? | ? | ? | ? | ? |
| Travill et al.,2018 <sup>31</sup>  | ! | ? | ? | ! | ?   | ?   | ? | - | - | - | - |
| Hill et al.,2020 <sup>30</sup>     | + | + | + | + | +   | +   | + | + | + | + | + |
| Morton et al.,2020 <sup>48*</sup>  | + | + | + | + | +   | +   | + | + | + | ! | + |
| Minnis et al.,2020 <sup>54</sup>   | + | + | + | + | +   | +   | + | + | + | + | + |
| Were et al.,2020 <sup>35*</sup>    | + | + | + | + | +   | +   | + | + | + | + | + |

+ = Yes/Low risk/No or very minor concerns; - = No/High risk/Serious concerns; ? = Can't tell/Unclear risk/Moderate concerns; ! = Minor concerns

\*Mixed methods study, Modelling studies were not appraised
